# Supplementary material for: Anthraquinone Derivatives and Other Aromatic Compounds from Marine Fungus Asteromyces cruciatus KMM 4696 and Their Effects against Staphylococcus aureus
Source: MDPI journal article supplement (doi:10.3390/md21080431), 2023-07-29

## **SUPPLEMENTARY MATERIALS**

**Anthraquinone derivatives and other aromatic compounds from marine fungus *Asteromyces cruciatus* KMM 4696 and their effects against *Staphylococcus aureus***

## Content

|                                                                                                  |    |
|--------------------------------------------------------------------------------------------------|----|
| Figure S1. UV spectrum of <b>1</b> .....                                                         | 5  |
| Figure S2. CD spectrum of <b>1</b> .....                                                         | 5  |
| Figure S3. UV spectrum of <b>2</b> .....                                                         | 6  |
| Figure S4. CD spectrum of <b>2</b> .....                                                         | 6  |
| Figure S5. UV spectrum of <b>3</b> .....                                                         | 7  |
| Figure S6. CD spectrum of <b>3</b> .....                                                         | 7  |
| Figure S7. <sup>1</sup> H NMR spectrum (500 MHz, acetone-d <sub>6</sub> ) of <b>1</b> .....      | 8  |
| Figure S8. <sup>13</sup> C NMR spectrum (125.75 MHz, acetone-d <sub>6</sub> ) of <b>1</b> .....  | 9  |
| Figure S9. COSY-45 spectrum (500 MHz, acetone-d <sub>6</sub> ) of <b>1</b> .....                 | 10 |
| Figure S10. HSQC spectrum (500 MHz, acetone-d <sub>6</sub> ) of <b>1</b> .....                   | 11 |
| Figure S11. HMBC spectrum (500 MHz, acetone-d <sub>6</sub> ) of <b>1</b> .....                   | 12 |
| Figure S12. ROESY spectrum (700 MHz, acetone-d <sub>6</sub> ) of <b>1</b> .....                  | 13 |
| Figure S13. <sup>1</sup> H NMR spectrum (500 MHz, acetone-d <sub>6</sub> ) of <b>2</b> .....     | 14 |
| Figure S14. <sup>13</sup> C NMR spectrum (125.75 MHz, acetone-d <sub>6</sub> ) of <b>2</b> ..... | 15 |
| Figure S15. DEPT-135 spectrum (125.75 MHz, acetone-d <sub>6</sub> ) of <b>2</b> .....            | 16 |
| Figure S16. COSY-45 spectrum (700 MHz, acetone-d <sub>6</sub> ) of <b>2</b> .....                | 17 |
| Figure S17. HSQC spectrum (700 MHz, acetone-d <sub>6</sub> ) of <b>2</b> .....                   | 18 |
| Figure S18. HMBC spectrum (700 MHz, acetone-d <sub>6</sub> ) of <b>2</b> .....                   | 19 |
| Figure S19. ROESY spectrum (700 MHz, acetone-d <sub>6</sub> ) of <b>2</b> .....                  | 20 |
| Figure S20. <sup>1</sup> H NMR spectrum (700 MHz, acetone-d <sub>6</sub> ) of <b>3</b> .....     | 21 |
| Figure S21. <sup>13</sup> C NMR spectrum (75.48 MHz, acetone-d <sub>6</sub> ) of <b>3</b> .....  | 22 |
| Figure S22. COSY-45 spectrum (700 MHz, acetone-d <sub>6</sub> ) of <b>3</b> .....                | 23 |
| Figure S23. HSQC spectrum (700 MHz, acetone-d <sub>6</sub> ) of <b>3</b> .....                   | 24 |
| Figure S24. HMBC spectrum (700 MHz, acetone-d <sub>6</sub> ) of <b>3</b> .....                   | 25 |
| Figure S25. ROESY spectrum (700 MHz, acetone-d <sub>6</sub> ) of <b>3</b> .....                  | 27 |
| Figure S26. <sup>1</sup> H spectrum (500 MHz, acetone-d <sub>6</sub> ) of <b>4</b> .....         | 28 |
| Figure S27. <sup>13</sup> C spectrum (125.77 MHz, acetone-d <sub>6</sub> ) of <b>4</b> .....     | 29 |
| Figure S28. DEPT-135 NMR spectrum (125.77 MHz, acetone-d <sub>6</sub> ) of <b>4</b> .....        | 30 |
| Figure S29. COSY-45 spectrum (500 MHz, acetone-d <sub>6</sub> ) of <b>4</b> .....                | 31 |
| Figure S30. HSQC spectrum (500 MHz, acetone-d <sub>6</sub> ) of <b>4</b> .....                   | 32 |
| Figure S31. HMBC spectrum (500 MHz, acetone-d <sub>6</sub> ) of <b>4</b> .....                   | 33 |
| Figure S32. ROESY spectrum (500 MHz, acetone-d <sub>6</sub> ) of <b>4</b> .....                  | 34 |
| Figure S33. <sup>1</sup> H NMR spectrum (500 MHz, CDCl <sub>3</sub> ) of <b>5</b> .....          | 35 |
| Figure S34. <sup>13</sup> C NMR spectrum (125.77 MHz, CDCl <sub>3</sub> ) of <b>5</b> .....      | 36 |
| Figure S35. DEPT-135 spectrum (125.77 MHz, CDCl <sub>3</sub> ) of <b>5</b> .....                 | 37 |
| Figure S36. <sup>1</sup> H NMR spectrum (700 MHz, acetone-d <sub>6</sub> ) of <b>6</b> .....     | 38 |
| Figure S37. <sup>13</sup> C NMR spectrum (125.77 MHz, acetone-d <sub>6</sub> ) of <b>6</b> ..... | 39 |
| Figure S38. DEPT-135 spectrum (125.77 MHz, acetone-d <sub>6</sub> ) of <b>6</b> .....            | 40 |

|                                                                                                   |    |
|---------------------------------------------------------------------------------------------------|----|
| Figure S39. COSY-45 spectrum (700 MHz, acetone-d <sub>6</sub> ) of <b>6</b> .....                 | 41 |
| Figure S40. HSQC spectrum (700 MHz, acetone-d <sub>6</sub> ) of <b>6</b> .....                    | 42 |
| Figure S41. HMBC spectrum (700 MHz, acetone-d <sub>6</sub> ) of <b>6</b> .....                    | 43 |
| Figure S42. ROESY spectrum (500 MHz, acetone-d <sub>6</sub> ) of <b>6</b> .....                   | 44 |
| Figure S43. <sup>1</sup> H NMR spectrum (700 MHz, acetone-d <sub>6</sub> ) of <b>7</b> .....      | 45 |
| Figure S44. <sup>13</sup> C NMR spectrum (176.04 MHz, acetone-d <sub>6</sub> ) of <b>7</b> .....  | 46 |
| Figure S45. DEPT-135 spectrum (176.04 MHz, acetone-d <sub>6</sub> ) of <b>7</b> .....             | 47 |
| Figure S46. COSY-45 spectrum (700 MHz, acetone-d <sub>6</sub> ) of <b>7</b> .....                 | 48 |
| Figure S47. HSQC spectrum (700 MHz, acetone-d <sub>6</sub> ) of <b>7</b> .....                    | 49 |
| Figure S48. HMBC spectrum (700 MHz, acetone-d <sub>6</sub> ) of <b>7</b> .....                    | 50 |
| Figure S49. ROESY spectrum (700 MHz, acetone-d <sub>6</sub> ) of <b>7</b> .....                   | 51 |
| Figure S50. <sup>1</sup> H NMR spectrum (700 MHz, acetone-d <sub>6</sub> ) of <b>8</b> .....      | 52 |
| Figure S51. <sup>13</sup> C NMR spectrum (176.04 MHz, acetone-d <sub>6</sub> ) of <b>8</b> .....  | 53 |
| Figure S52. DEPT-135 spectrum (176.04 MHz, acetone-d <sub>6</sub> ) of <b>8</b> .....             | 54 |
| Figure S53. COSY-45 spectrum (700 MHz, acetone-d <sub>6</sub> ) of <b>8</b> .....                 | 55 |
| Figure S54. HSQC spectrum (700 MHz, acetone-d <sub>6</sub> ) of <b>8</b> .....                    | 56 |
| Figure S55. HMBC spectrum (700 MHz, acetone-d <sub>6</sub> ) of <b>8</b> .....                    | 57 |
| Figure S56. ROESY spectrum (700 MHz, acetone-d <sub>6</sub> ) of <b>8</b> .....                   | 58 |
| Figure S57. <sup>1</sup> H NMR spectrum (500 MHz, acetone-d <sub>6</sub> ) of <b>9</b> .....      | 59 |
| Figure S58. <sup>13</sup> C NMR spectrum (125.77 MHz, acetone-d <sub>6</sub> ) of <b>9</b> .....  | 60 |
| Figure S59. DEPT-135 spectrum (125.77 MHz, acetone-d <sub>6</sub> ) of <b>9</b> .....             | 61 |
| Figure S60. COSY-45 spectrum (500 MHz, acetone-d <sub>6</sub> ) of <b>9</b> .....                 | 62 |
| Figure S61. HSQC spectrum (500 MHz, acetone-d <sub>6</sub> ) of <b>9</b> .....                    | 63 |
| Figure S62. HMBC spectrum (500 MHz, acetone-d <sub>6</sub> ) of <b>9</b> .....                    | 64 |
| Figure S63. ROESY spectrum (500 MHz, acetone-d <sub>6</sub> ) of <b>9</b> .....                   | 65 |
| Figure S64. <sup>1</sup> H NMR spectrum (500 MHz, acetone-d <sub>6</sub> ) of <b>10</b> .....     | 66 |
| Figure S65. <sup>13</sup> C NMR spectrum (125.77 MHz, acetone-d <sub>6</sub> ) of <b>10</b> ..... | 67 |
| Figure S66. DEPT-135 spectrum (125.77 MHz, acetone-d <sub>6</sub> ) of <b>10</b> .....            | 68 |
| Figure S67. COSY-45 spectrum (500 MHz, acetone-d <sub>6</sub> ) of <b>10</b> .....                | 69 |
| Figure S68. HSQC spectrum (500 MHz, acetone-d <sub>6</sub> ) of <b>10</b> .....                   | 70 |
| Figure S69. HMBC spectrum (500 MHz, acetone-d <sub>6</sub> ) of <b>10</b> .....                   | 71 |
| Figure S70. ROESY spectrum (500 MHz, acetone-d <sub>6</sub> ) of <b>10</b> .....                  | 72 |
| Figure S71. <sup>1</sup> H NMR spectrum (700 MHz, acetone-d <sub>6</sub> ) of <b>11</b> .....     | 73 |
| Figure S72. <sup>13</sup> C NMR spectrum (176.04 MHz, acetone-d <sub>6</sub> ) of <b>11</b> ..... | 74 |
| Figure S73. DEPT-135 NMR spectrum (176.04 MHz, acetone-d <sub>6</sub> ) of <b>11</b> .....        | 75 |
| Figure S74. COSY-45 spectrum (700 MHz, acetone-d <sub>6</sub> ) of <b>11</b> .....                | 76 |
| Figure S75. HSQC spectrum (700 MHz, acetone-d <sub>6</sub> ) of <b>11</b> .....                   | 77 |
| Figure S76. HMBC spectrum (700 MHz, acetone-d <sub>6</sub> ) of <b>11</b> .....                   | 78 |
| Figure S77. ROESY spectrum (700 MHz, acetone-d <sub>6</sub> ) of <b>11</b> .....                  | 79 |

|                                                                                                  |     |
|--------------------------------------------------------------------------------------------------|-----|
| Figure S78. $^1\text{H}$ NMR spectrum (500 MHz, acetone- $\text{d}_6$ ) of <b>12</b> .....       | 80  |
| Figure S79. $^{13}\text{C}$ NMR spectrum (125.77 MHz, acetone- $\text{d}_6$ ) of <b>12</b> ..... | 81  |
| Figure S80. COSY-45 spectrum (500 MHz, acetone- $\text{d}_6$ ) of <b>12</b> .....                | 82  |
| Figure S81. HSQC spectrum (500 MHz, acetone- $\text{d}_6$ ) of <b>12</b> .....                   | 83  |
| Figure S82. HMBC spectrum (700 MHz, acetone- $\text{d}_6$ ) of <b>12</b> .....                   | 84  |
| Figure S83. ROESY spectrum (700 MHz, acetone- $\text{d}_6$ ) of <b>12</b> .....                  | 85  |
| Figure S84. $^1\text{H}$ NMR spectrum (700 MHz, $\text{CDCl}_3$ ) of <b>13</b> .....             | 86  |
| Figure S85. $^{13}\text{C}$ NMR spectrum (176.04 MHz, $\text{CDCl}_3$ ) of <b>13</b> .....       | 87  |
| Figure S86. DEPT-135 NMR spectrum (176.04 MHz, $\text{CDCl}_3$ ) of <b>13</b> .....              | 88  |
| Figure S87. COSY-45 spectrum (700 MHz, $\text{CDCl}_3$ ) of <b>13</b> .....                      | 89  |
| Figure S88. HSQC spectrum (700 MHz, $\text{CDCl}_3$ ) of <b>13</b> .....                         | 90  |
| Figure S89. HMBC spectrum (700 MHz, $\text{CDCl}_3$ ) of <b>13</b> .....                         | 91  |
| Figure S90. ROESY spectrum (700 MHz, $\text{CDCl}_3$ ) of <b>13</b> .....                        | 92  |
| Figure S91. (+) ESI MS of <b>1</b> .....                                                         | 93  |
| Figure S92. (-) ESI MS of <b>1</b> .....                                                         | 93  |
| Figure S93. (+) ESI MS of <b>2</b> .....                                                         | 94  |
| Figure S94. (-) ESI MS of <b>2</b> .....                                                         | 94  |
| Figure S95. (+) ESI MS of <b>3</b> .....                                                         | 95  |
| Figure S96. (-) ESI MS of <b>3</b> .....                                                         | 95  |
| Figure S97. (+) ESI MS of <b>6</b> .....                                                         | 96  |
| Figure S98. (+) ESI MS of <b>7</b> .....                                                         | 97  |
| Figure S99. (+) ESI MS of <b>8</b> .....                                                         | 98  |
| Figure S100. (-) ESI MS of <b>9</b> .....                                                        | 99  |
| Figure S101. (-) ESI MS of <b>10</b> .....                                                       | 100 |
| Figure S102. (-) ESI MS of <b>11</b> .....                                                       | 101 |
| Figure S103. (+) ESI MS of <b>12</b> .....                                                       | 101 |
| Figure S104. (+) ESI MS of <b>13</b> .....                                                       | 102 |

Figure S1. UV spectrum of **1**

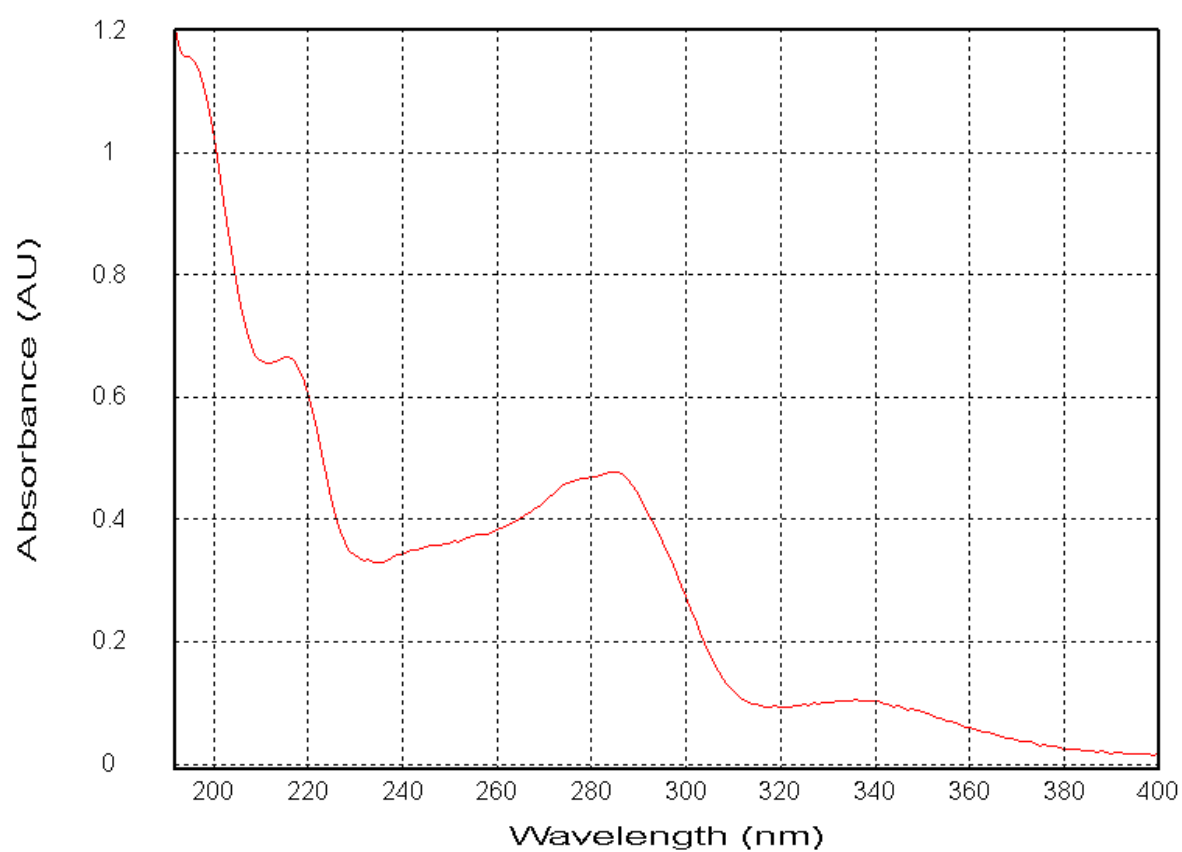

Figure S2. CD spectrum of **1**

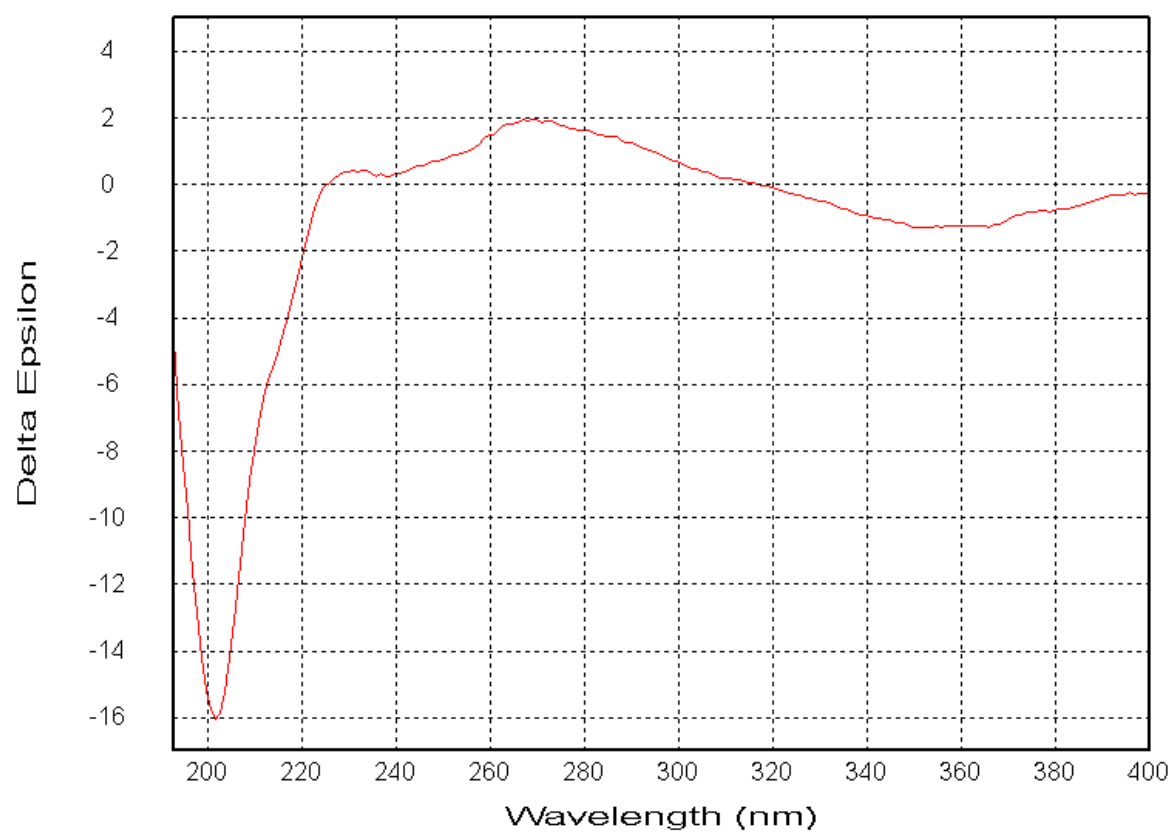

Figure S3. UV spectrum of **2**

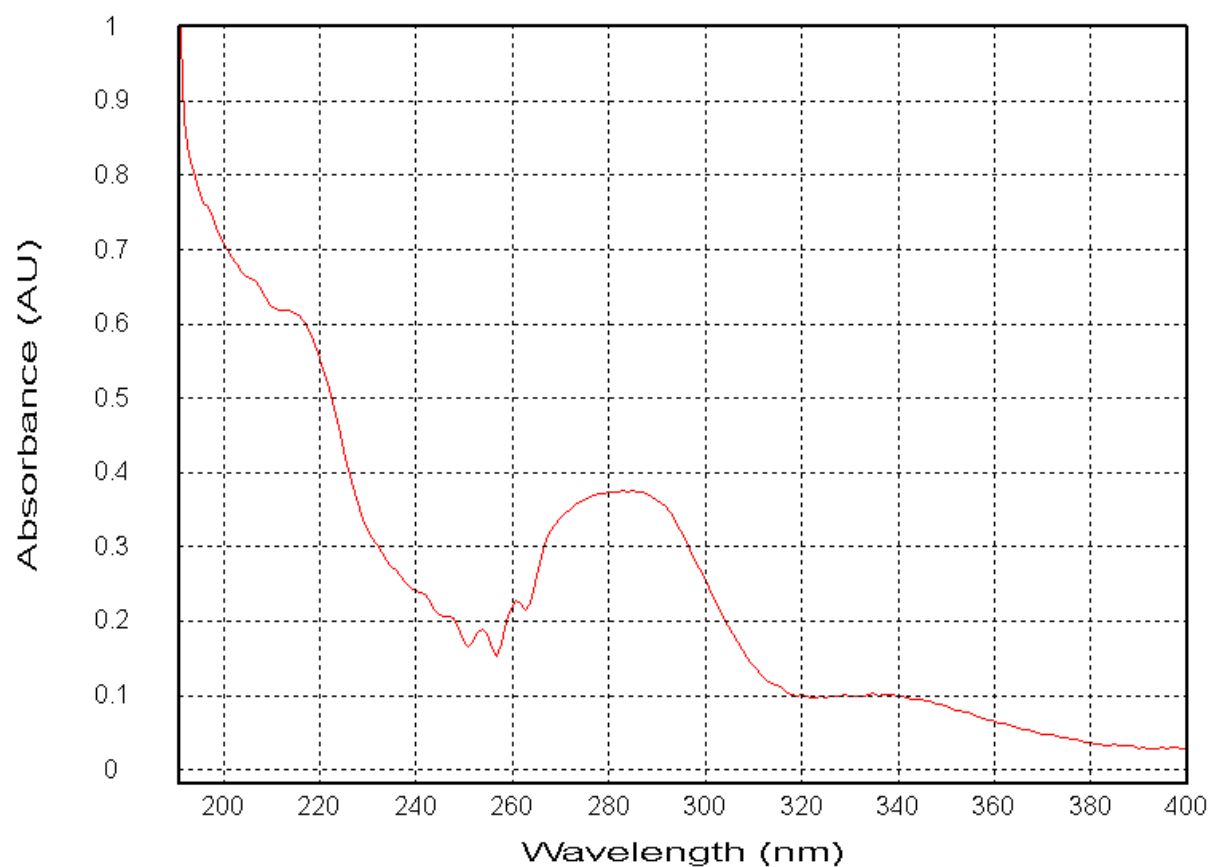

Figure S4. CD spectrum of **2**

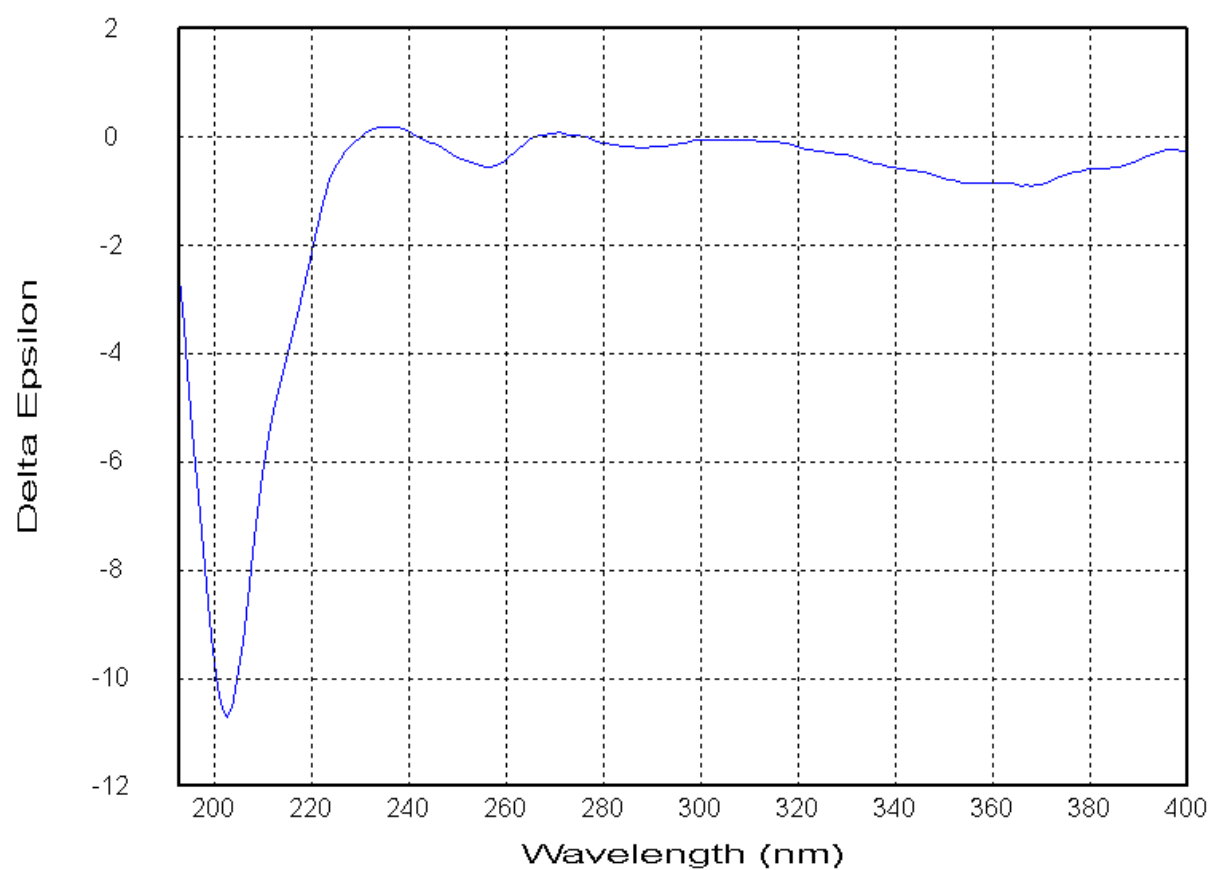

Figure S5. UV spectrum of **3**

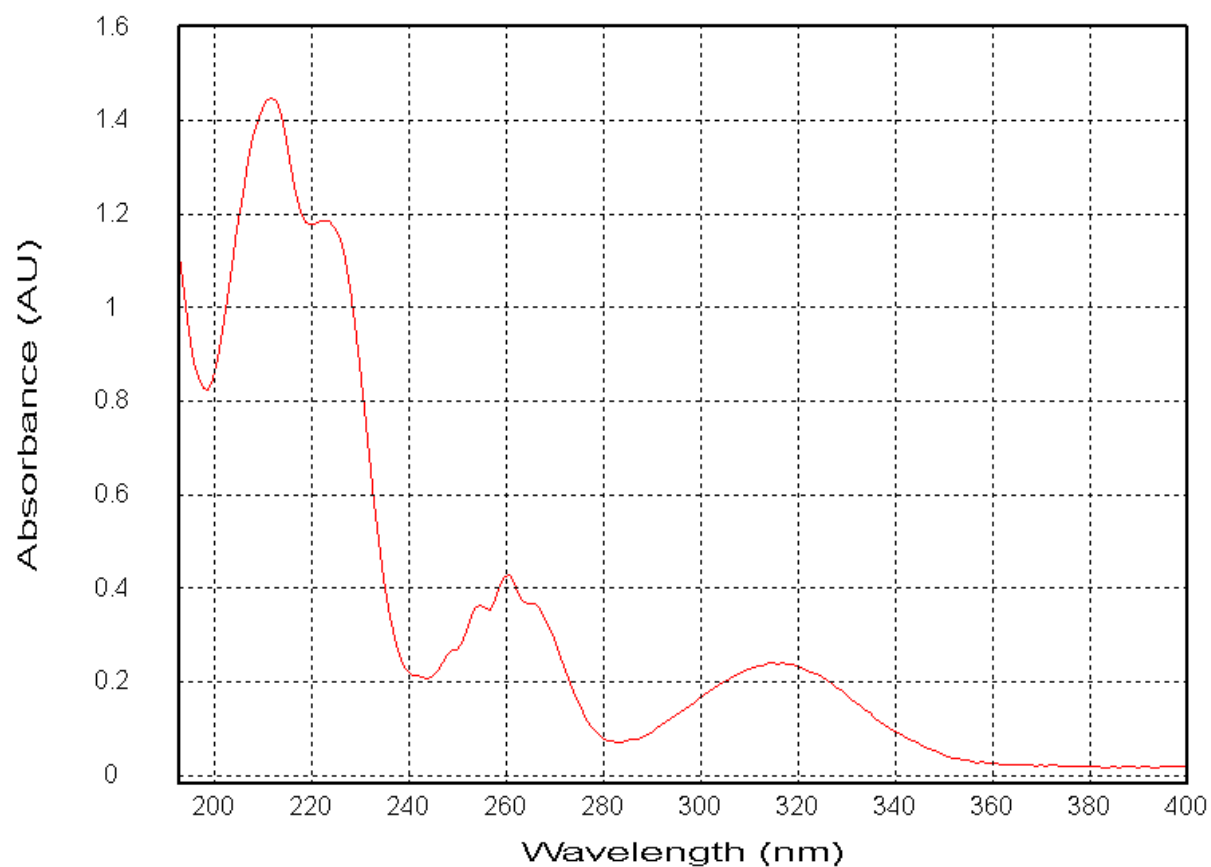

Figure S6. CD spectrum of **3**

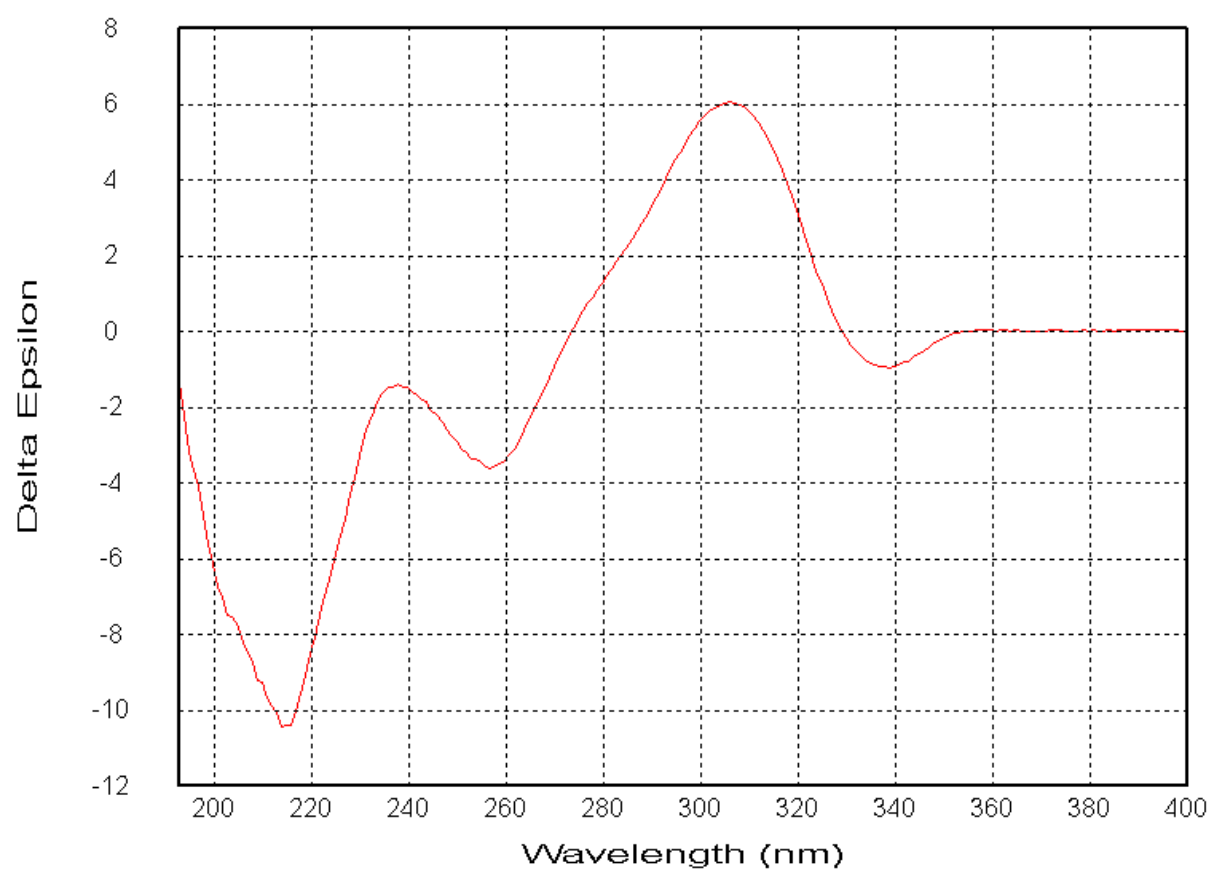

Figure S7.  $^1\text{H}$  NMR spectrum (500 MHz, acetone- $\text{d}_6$ ) of **1**

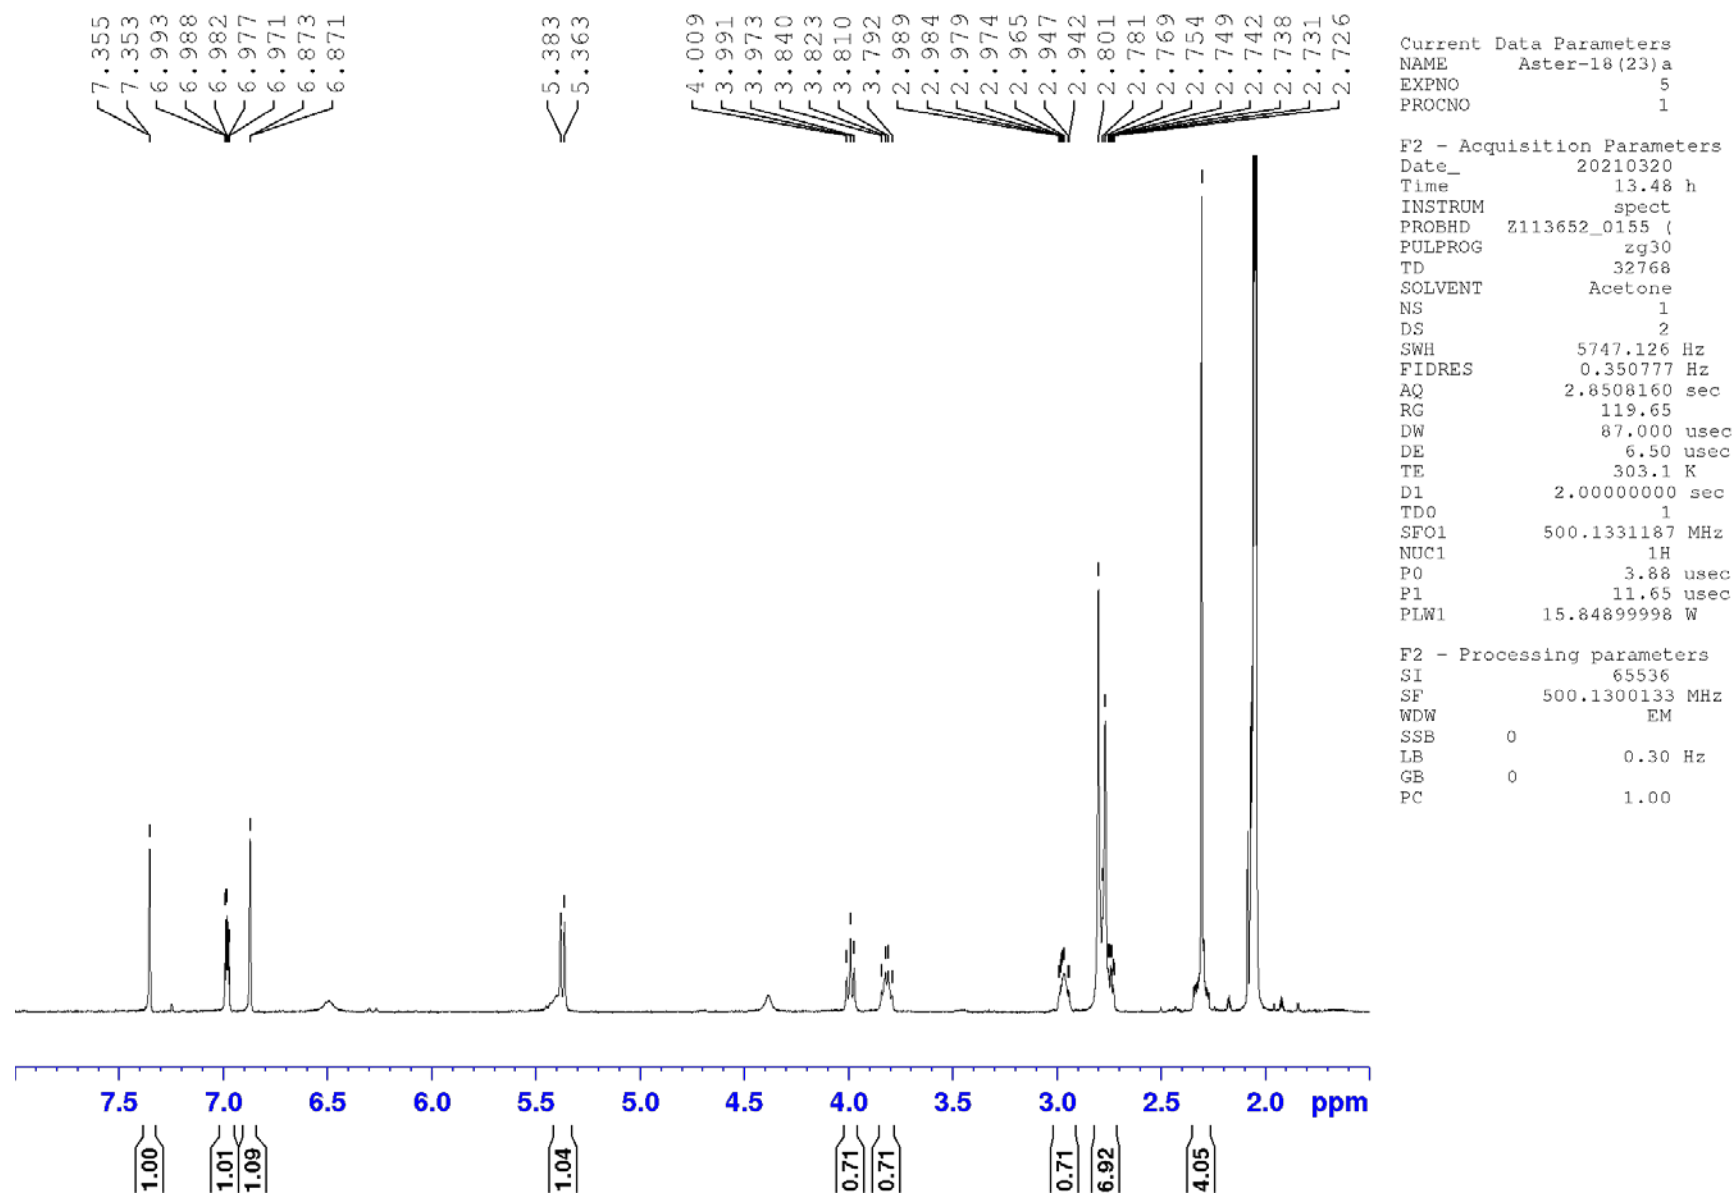



Figure S8.  $^{13}\text{C}$  NMR spectrum (125.75 MHz, acetone- $\text{d}_6$ ) of **1**

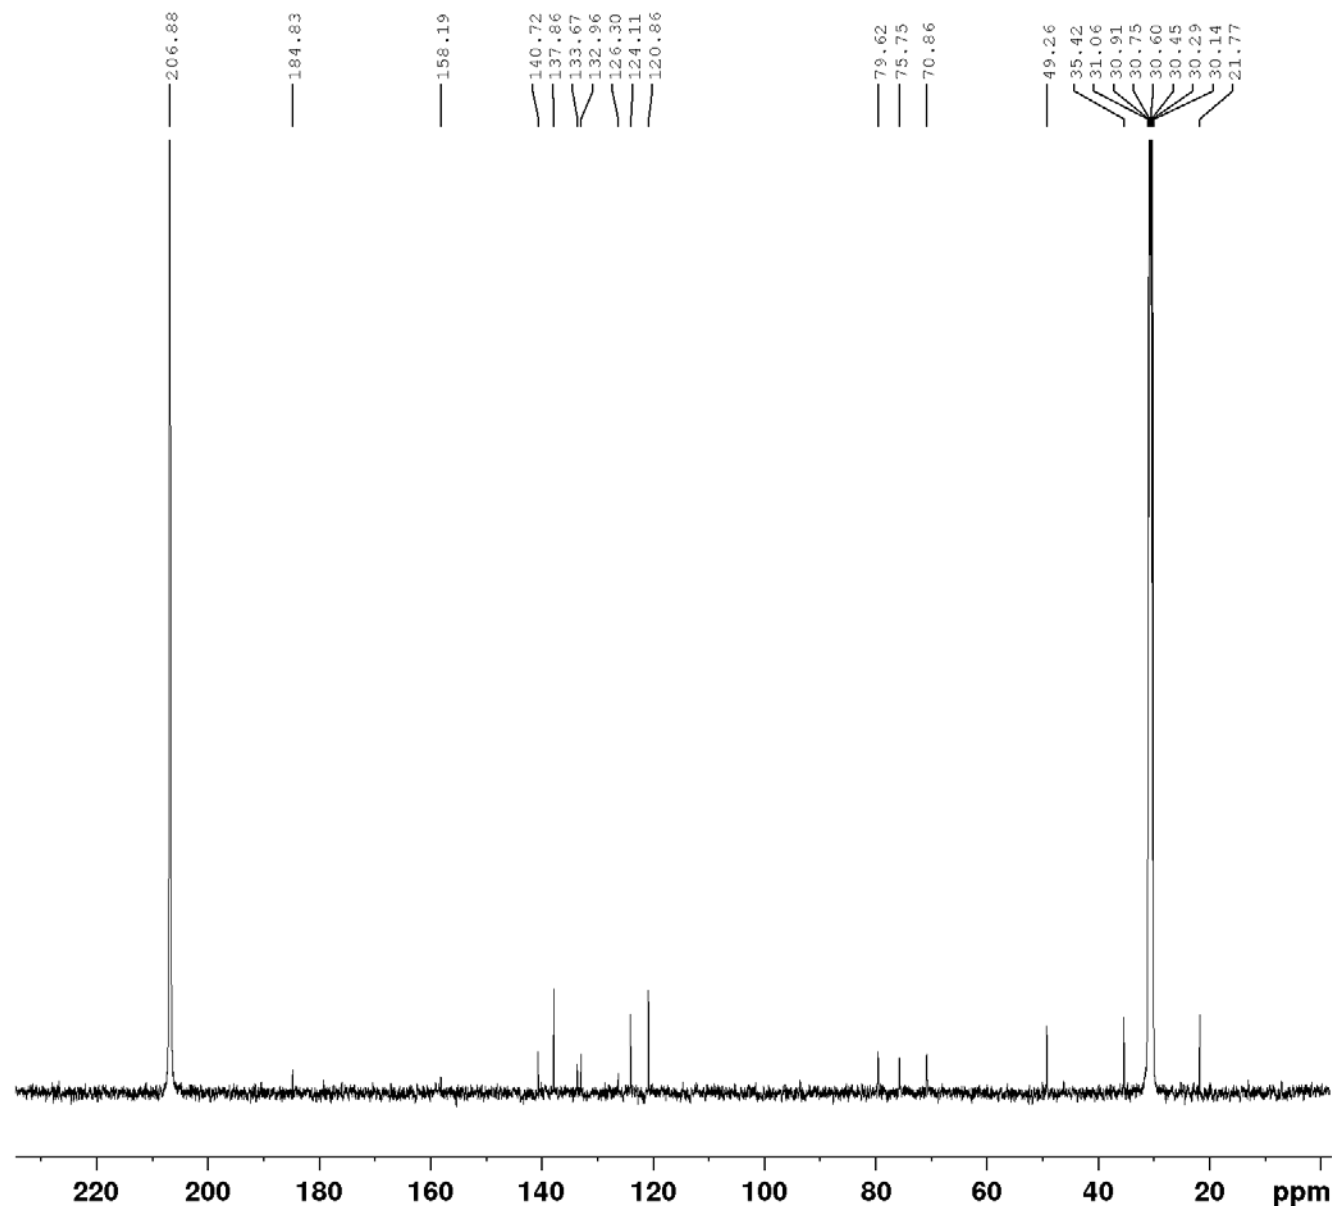

Current Data Parameters  
NAME Aster-18 (23)a  
EXPNO 11  
PROCNO 1

F2 - Acquisition Parameters  
Date\_ 20210320  
Time 13.46 h  
INSTRUM spect  
PROBHD Z113652\_0155 (   
PULPROG zgpg30  
TD 32768  
SOLVENT Acetone  
NS 1291  
DS 4  
SWH 29761.904 Hz  
FIDRES 1.816522 Hz  
AQ 0.5505024 sec  
RG 196.84  
DW 16.800 usec  
DE 6.50 usec  
TE 303.1 K  
D1 1.50000000 sec  
D11 0.03000000 sec  
TD0 128  
SFO1 125.7722511 MHz  
NUC1 13C  
P0 4.03 usec  
P1 12.10 usec  
PLW1 79.43299866 W  
SFO2 500.1320005 MHz  
NUC2 1H  
CPDPRG[2] waltz16  
PCPD2 80.00 usec  
PLW2 15.84899998 W  
PLW12 0.33610001 W  
PLW13 0.16906001 W

F2 - Processing parameters  
SI 65536  
SF 125.7575780 MHz  
WDW EM  
SSB 0  
LB 5.00 Hz  
GB 0  
PC 1.30

Figure S9. COSY-45 spectrum (500 MHz, acetone-d<sub>6</sub>) of **1**

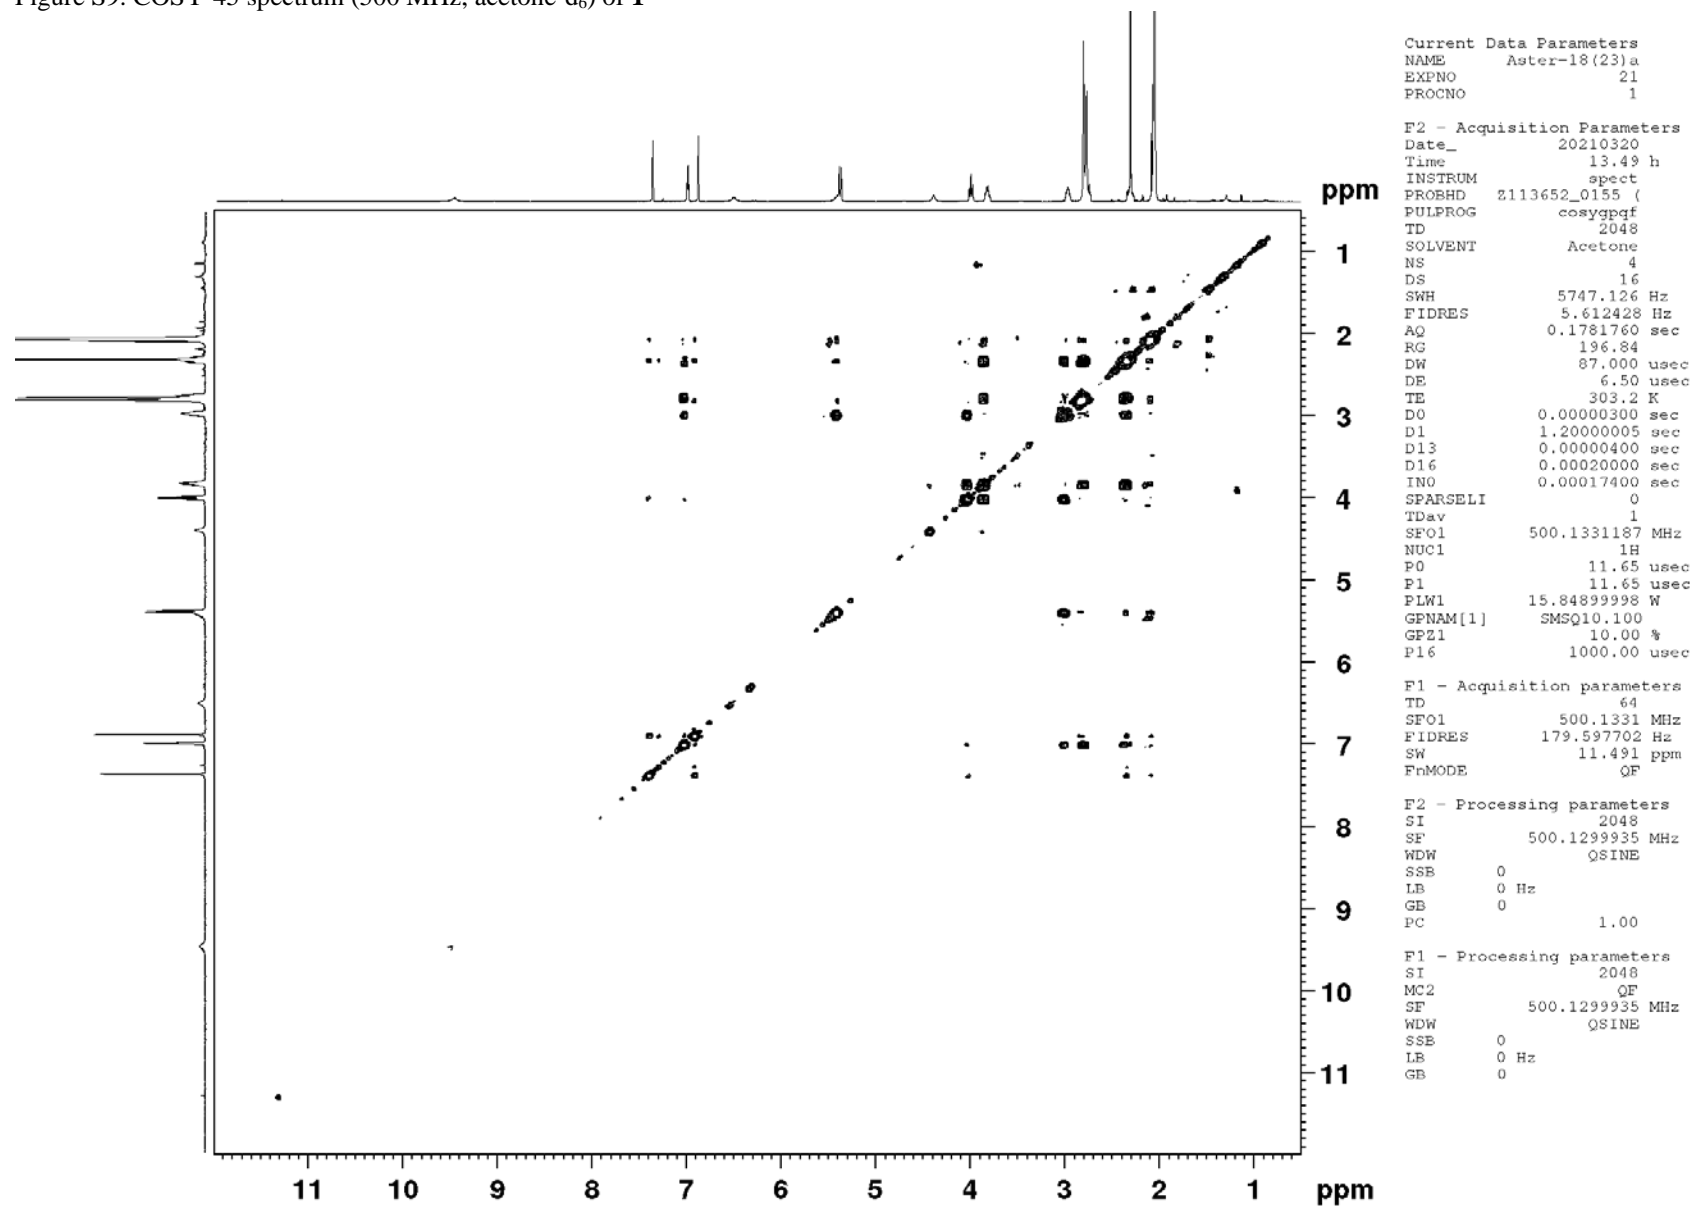

Figure S10. HSQC spectrum (500 MHz, acetone-d<sub>6</sub>) of **1**

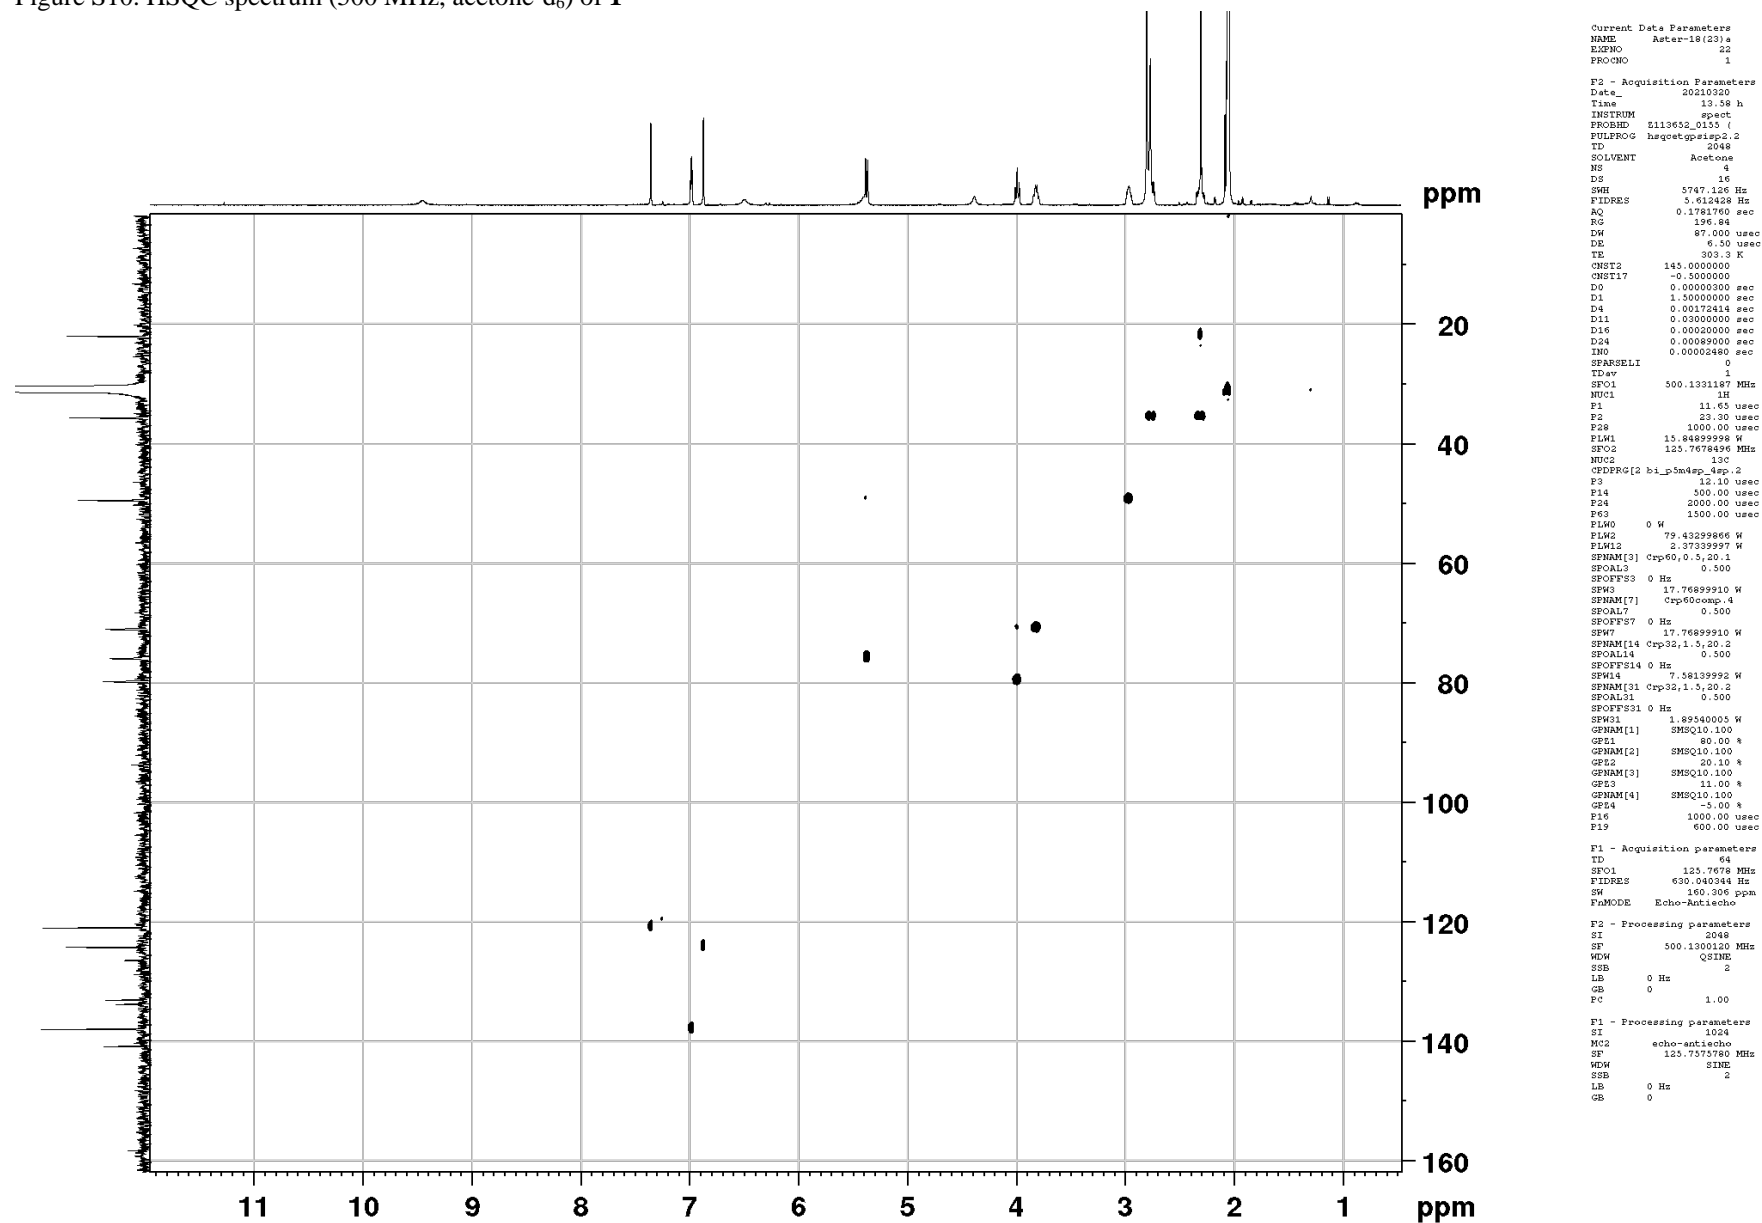

Figure S11. HMBC spectrum (500 MHz, acetone-d<sub>6</sub>) of **1**

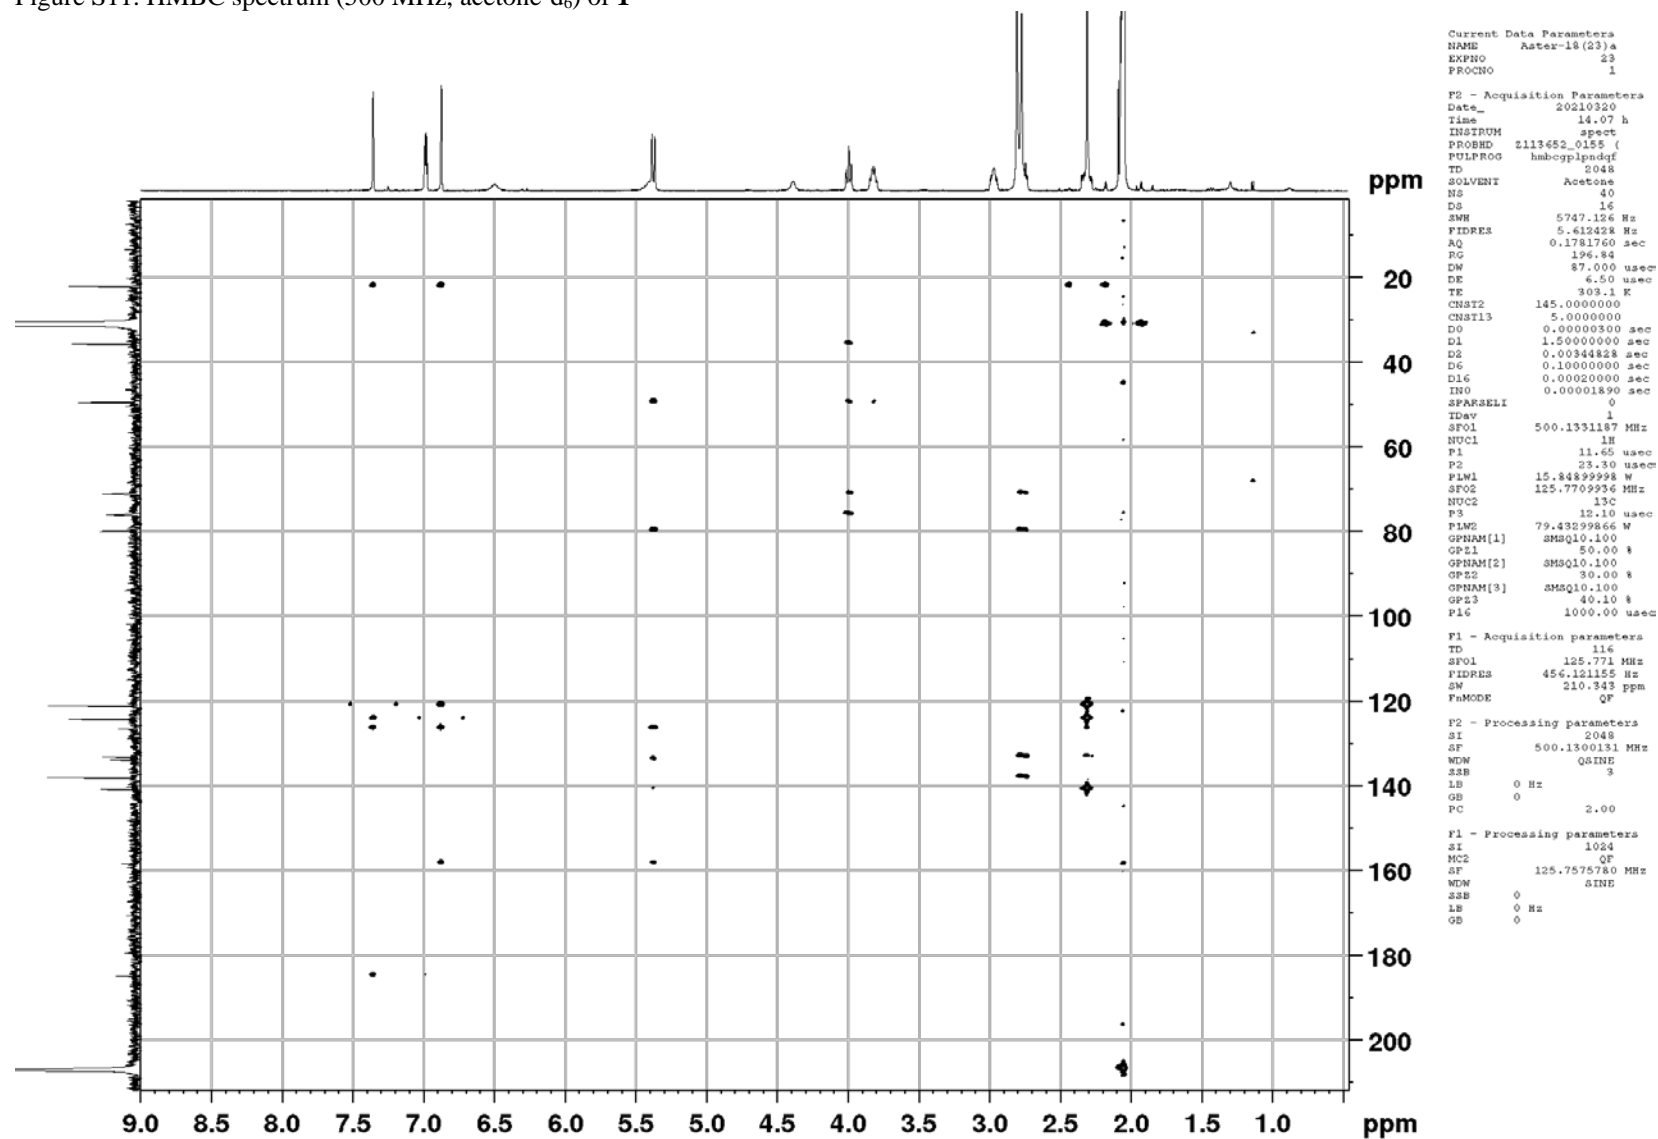

Figure S12. ROESY spectrum (700 MHz, acetone-d<sub>6</sub>) of **1**

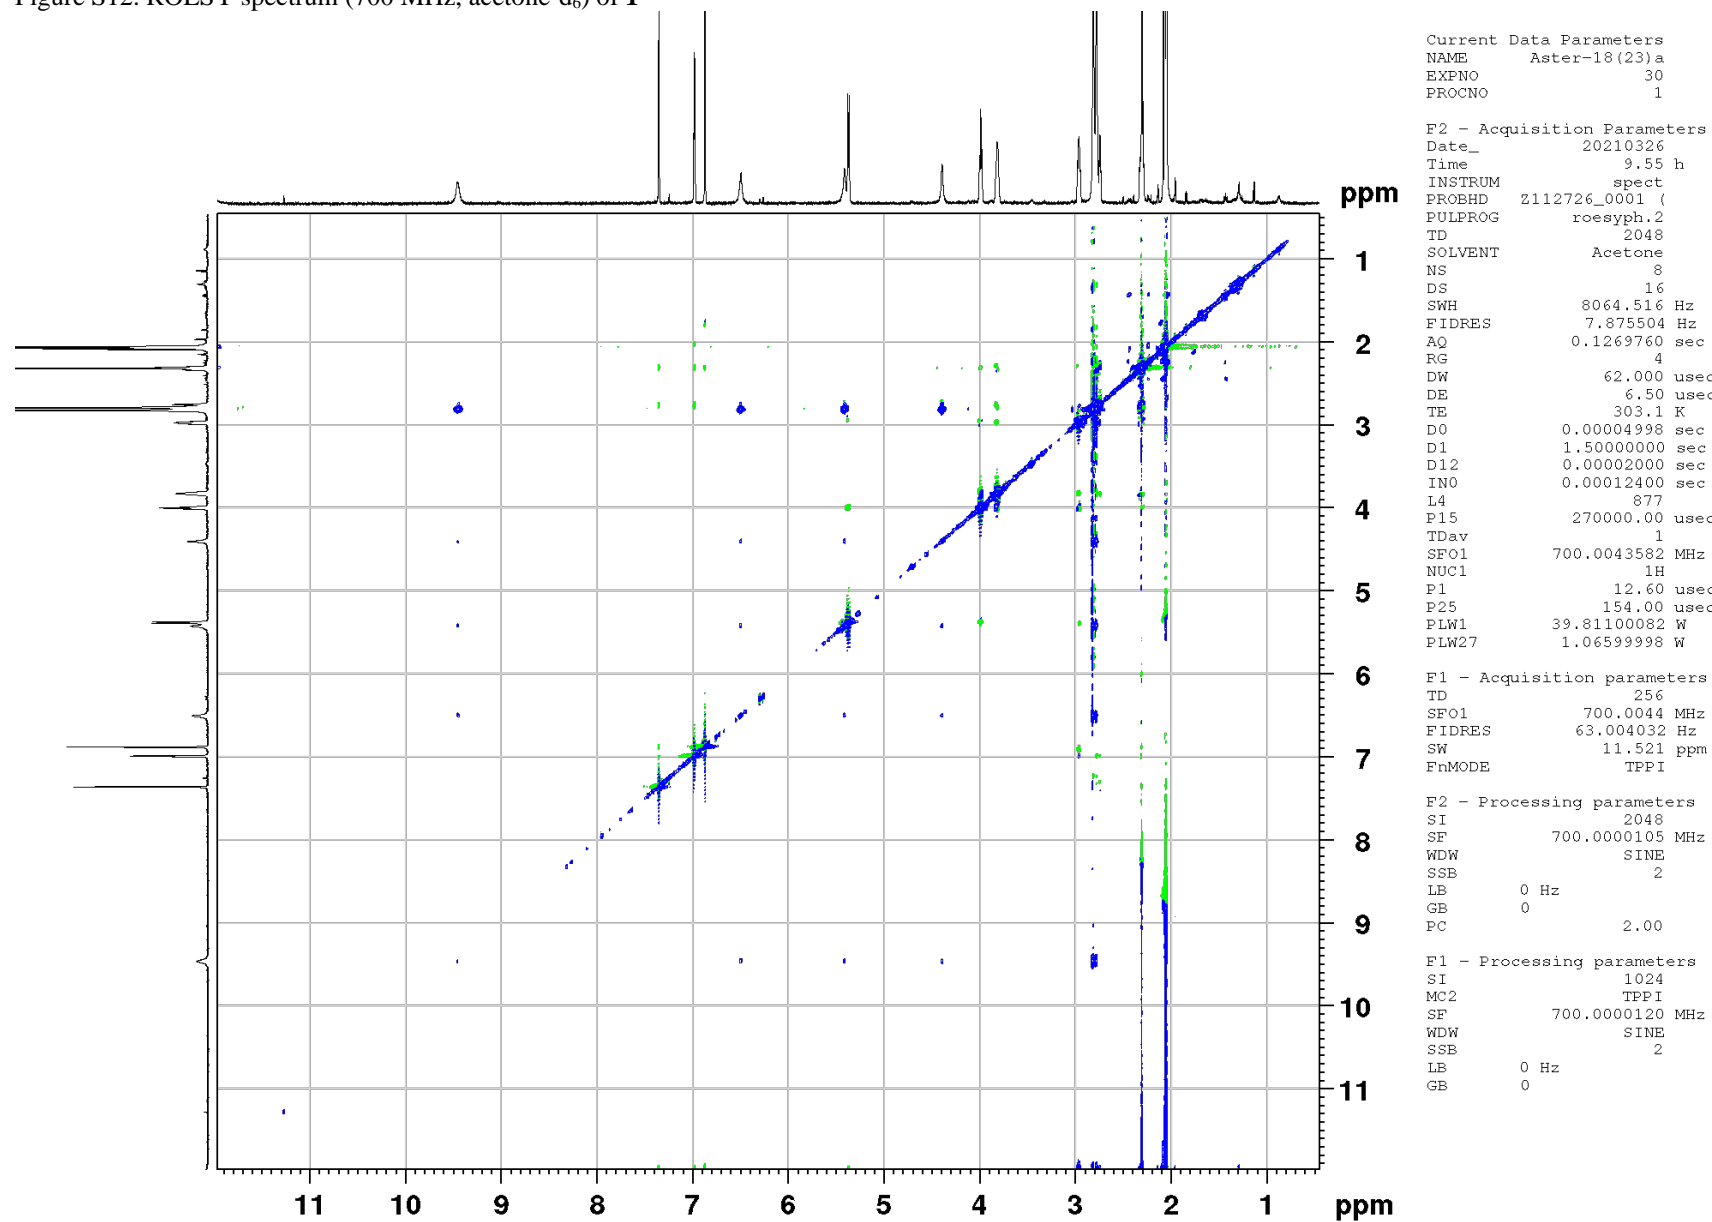

Figure S13. <sup>1</sup>H NMR spectrum (500 MHz, acetone-d<sub>6</sub>) of **2**

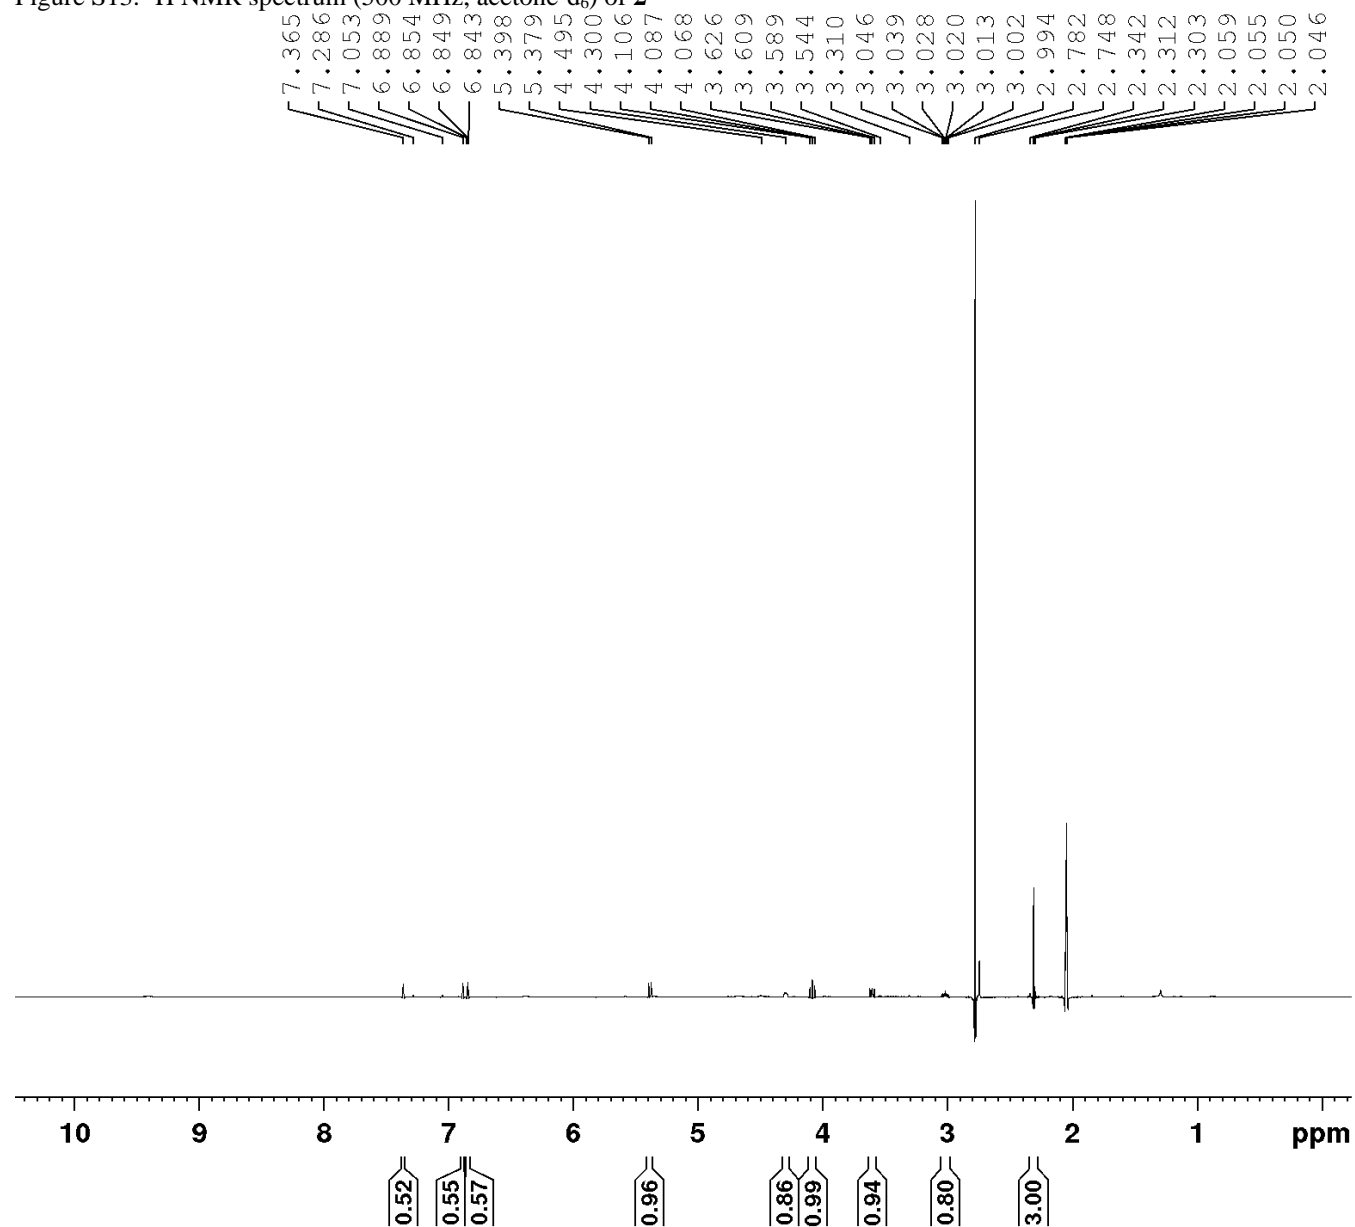

Current Data Parameters  
NAME Aster-53-4  
EXPNO 30  
PROCNO 1

F2 - Acquisition Parameters  
Date\_ 20210913  
Time 17.02 h  
INSTRUM spect  
PROBHD Z113652\_0155 (  
PULPROG zg  
TD 32768  
SOLVENT Acetone  
NS 1  
DS 2  
SWH 8012.820 Hz  
FIDRES 0.489064 Hz  
AQ 2.0447233 sec  
RG 91.04  
DW 62.400 usec  
DE 6.50 usec  
TE 303.2 K  
D1 1.00000000 sec  
TD0 1  
SFO1 500.1339010 MHz  
NUC1 1H  
P1 12.00 usec  
PLW1 15.84899998 W

F2 - Processing parameters  
SI 65536  
SF 500.1300133 MHz  
WDW GM  
SSB 0  
LB -2.50 Hz  
GB 0.1  
PC 3.00

Figure S14.  $^{13}\text{C}$  NMR spectrum (125.75 MHz, acetone- $\text{d}_6$ ) of 2

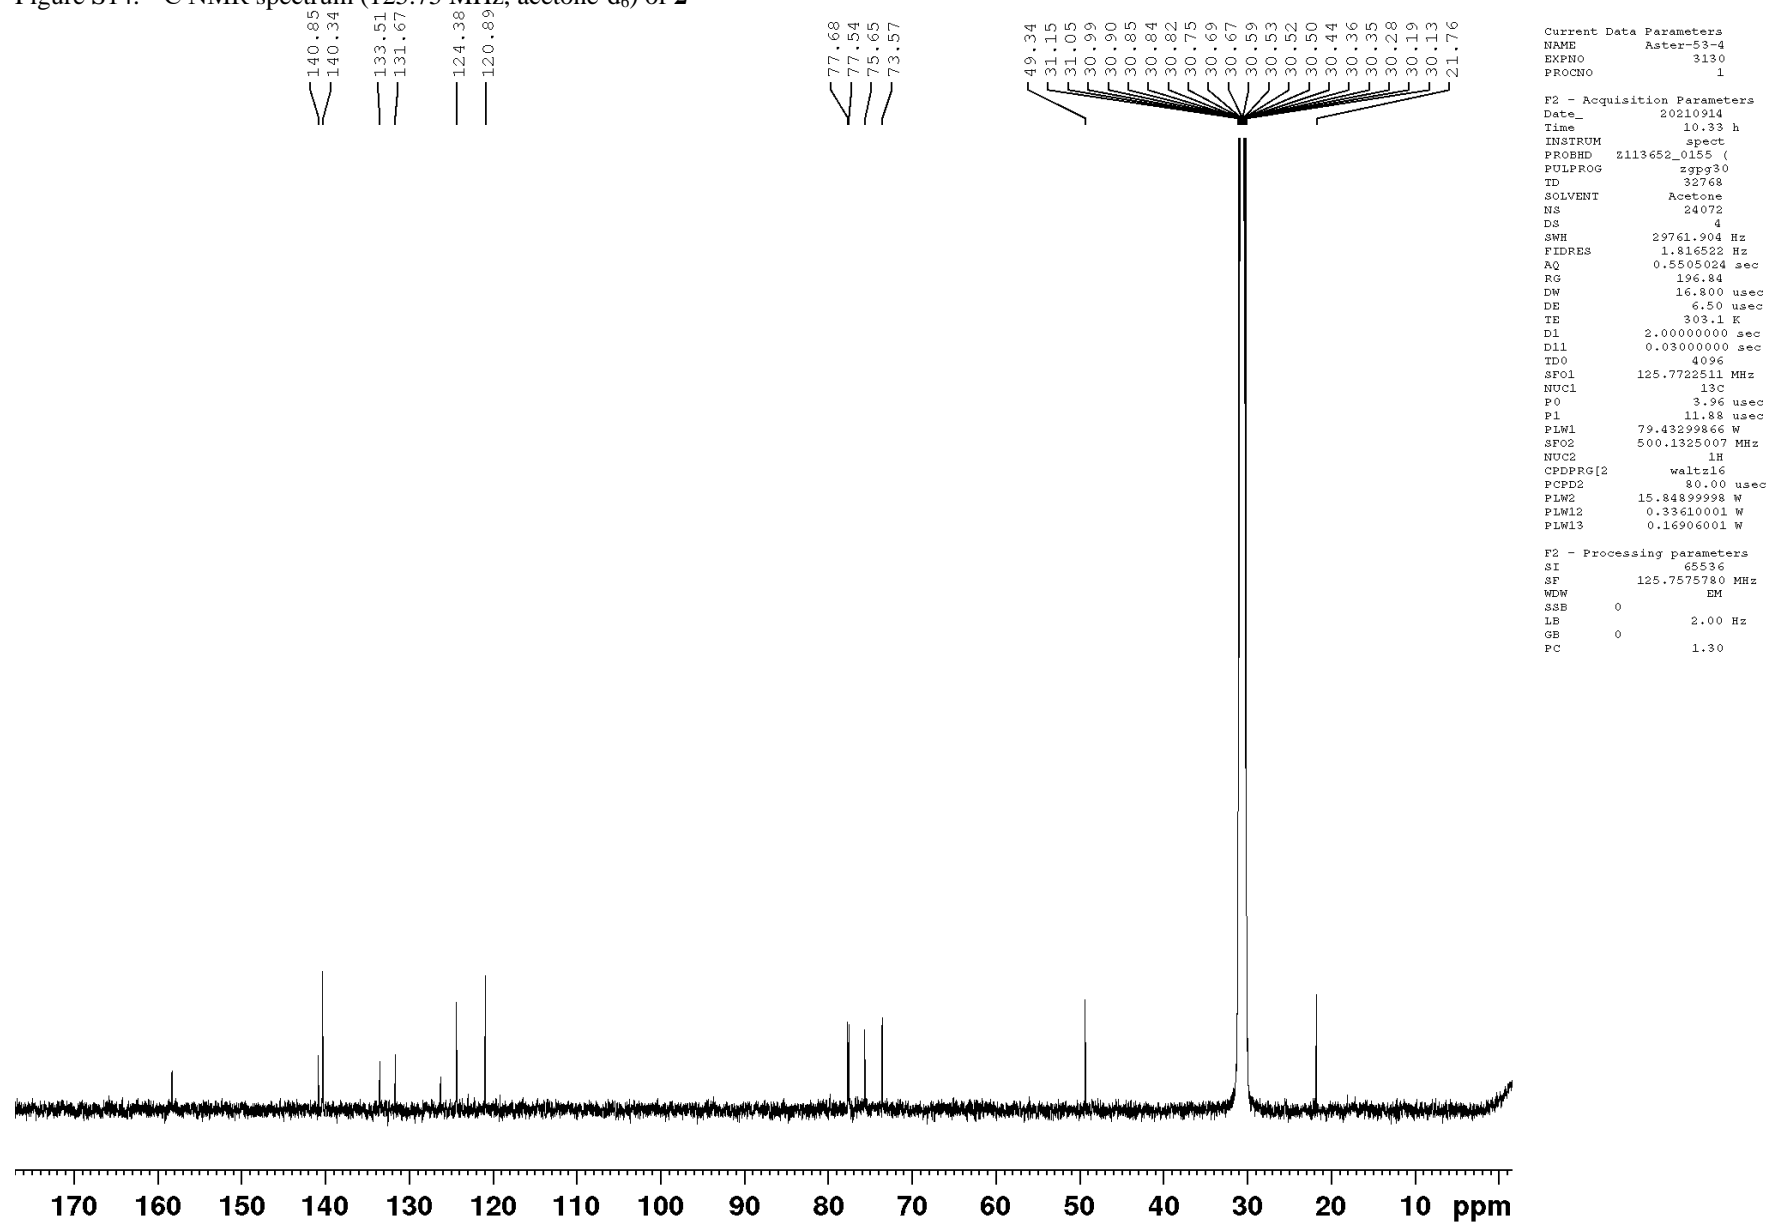

Figure S15. DEPT-135 spectrum (125.75 MHz, acetone-d<sub>6</sub>) of **2**

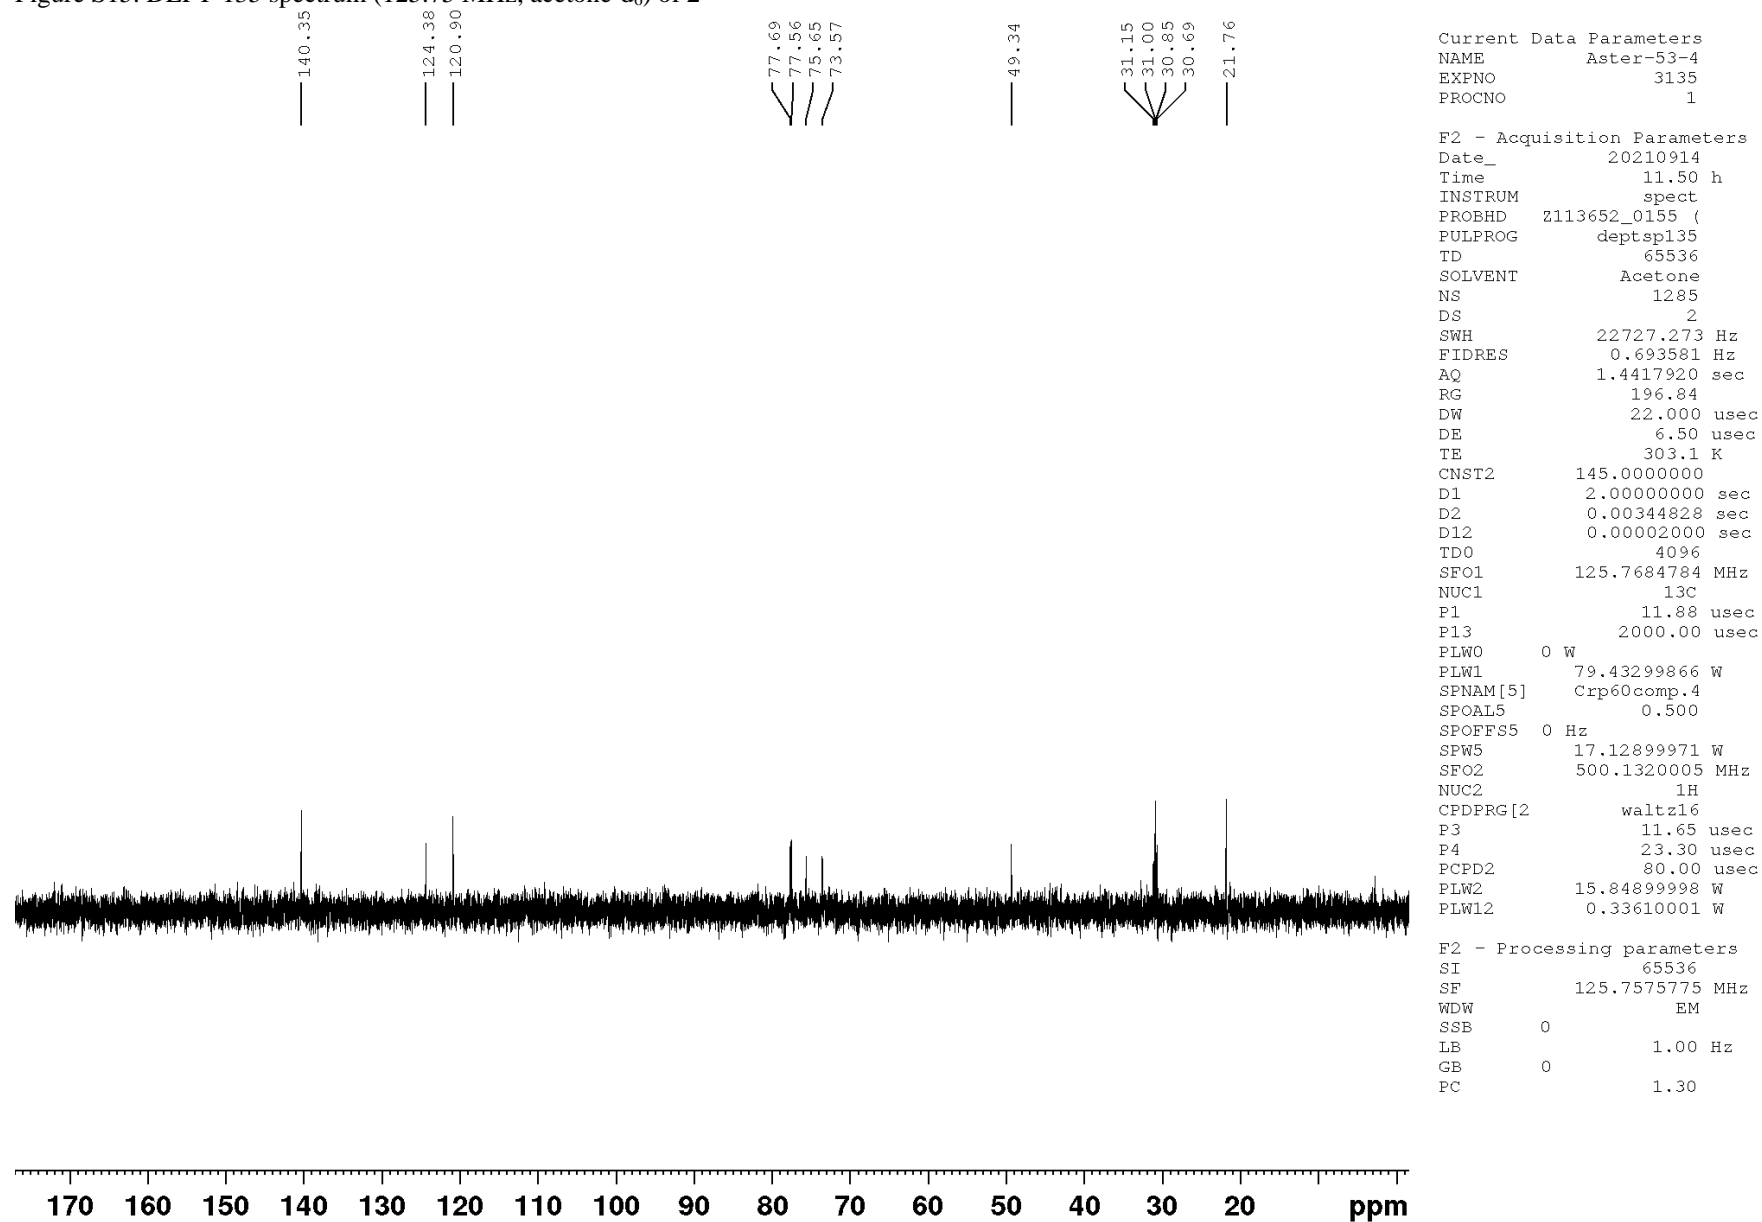



Figure S16. COSY-45spectrum (700 MHz, acetone-d<sub>6</sub>) of **2**

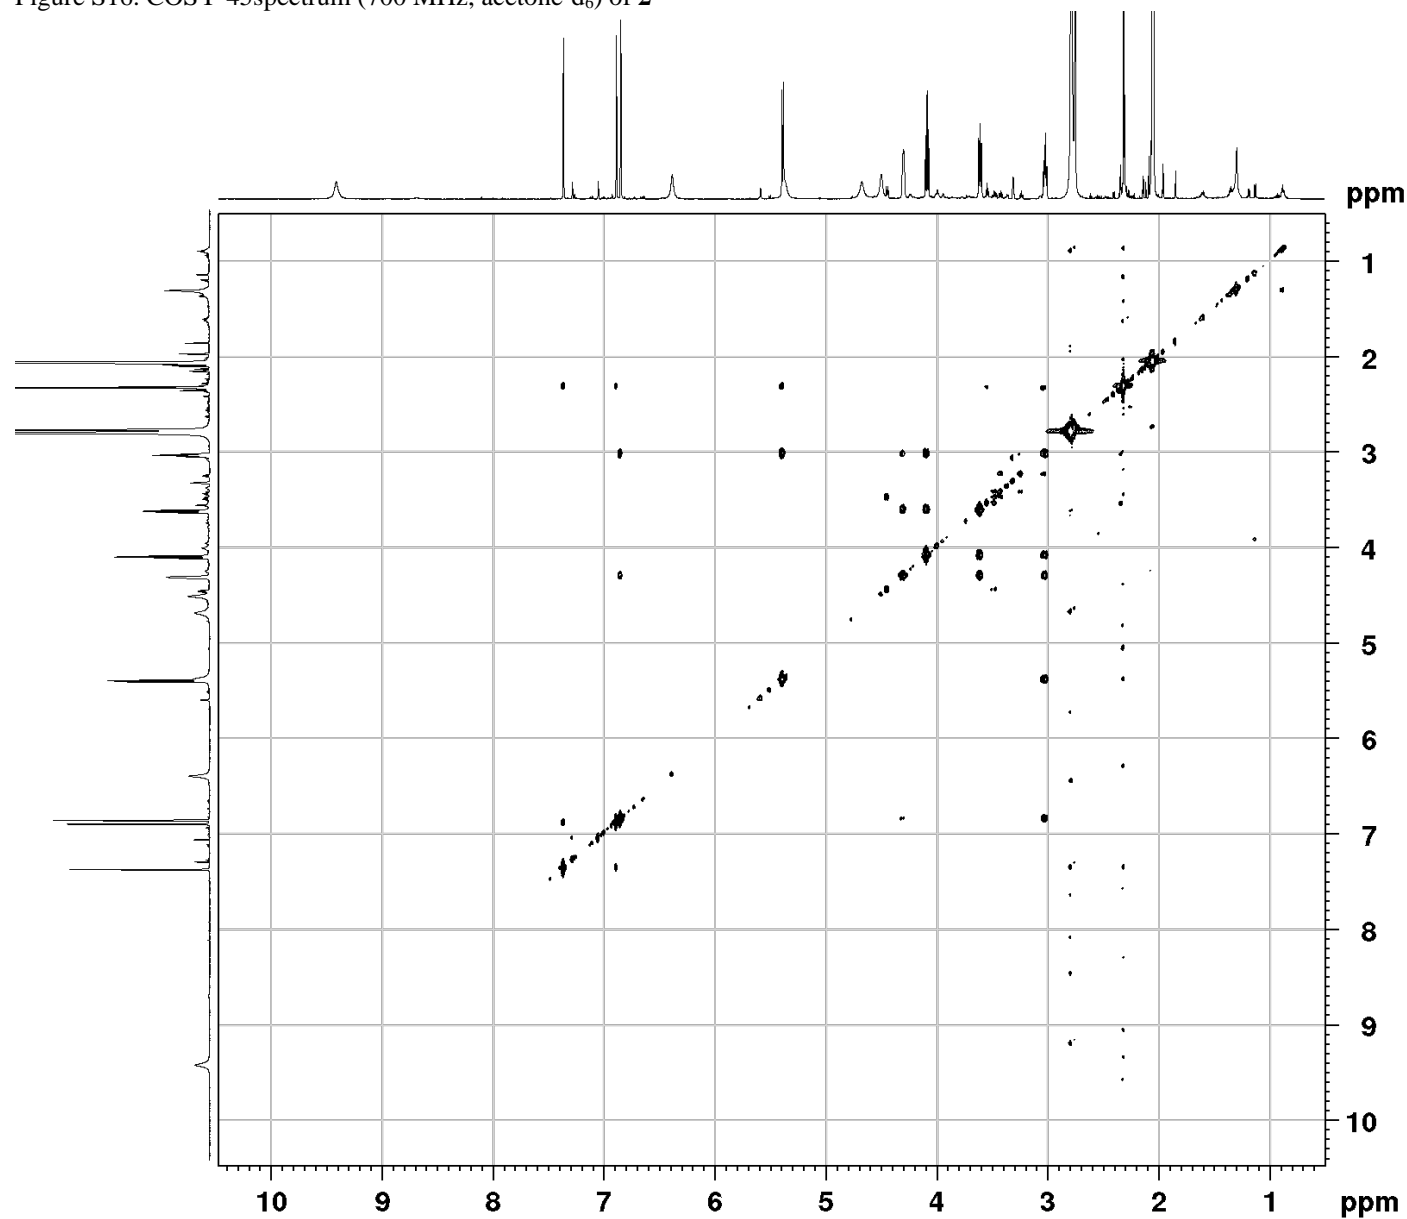

```

Current Data Parameters
NAME      Aster-53-4
EXPNO     455
PROCNO    1

F2 - Acquisition Parameters
Date_     20210918
Time      14.30 h
INSTRUM   spect
PROBHD    Z180728_0001 (
PULPROG   cosygpgpf
TD        4096
SOLVENT   Acetone
NS        16
DS        8
SWH       7692.308 Hz
FIDRES    3.756010 Hz
AQ        0.2662400 sec
RG        191.01
DW        65.000 usec
DE        6.50 usec
TE        303.1 K
D0        0.00000300 sec
D1        2.00000000 sec
D13       0.00000400 sec
D16       0.00020000 sec
IN0       0.00013000 sec
SPARSELI   0
TDAV      1
SF01      700.0035000 MHz
NUC1      1H
P0        8.00 usec
P1        8.00 usec
PLW1      18.54100037 W
GPNAM[1]  SINE.100
GPZ1      10.00 %
P16       1000.00 usec

F1 - Acquisition parameters
TD        128
SF01      700.0035 MHz
FIDRES    120.192307 Hz
SW        10.989 ppm
FnMODE    QF

F2 - Processing parameters
SI        2048
SF        700.0000133 MHz
WDW       SINE
SSB       0
LB        0 Hz
GB        0
PC        1.00

F1 - Processing parameters
SI        2048
MC2       QF
SF        700.0000123 MHz
WDW       SINE
SSB       0
LB        0 Hz
GB        0

```

Figure S17. HSQC spectrum (700 MHz, acetone-d<sub>6</sub>) of **2**

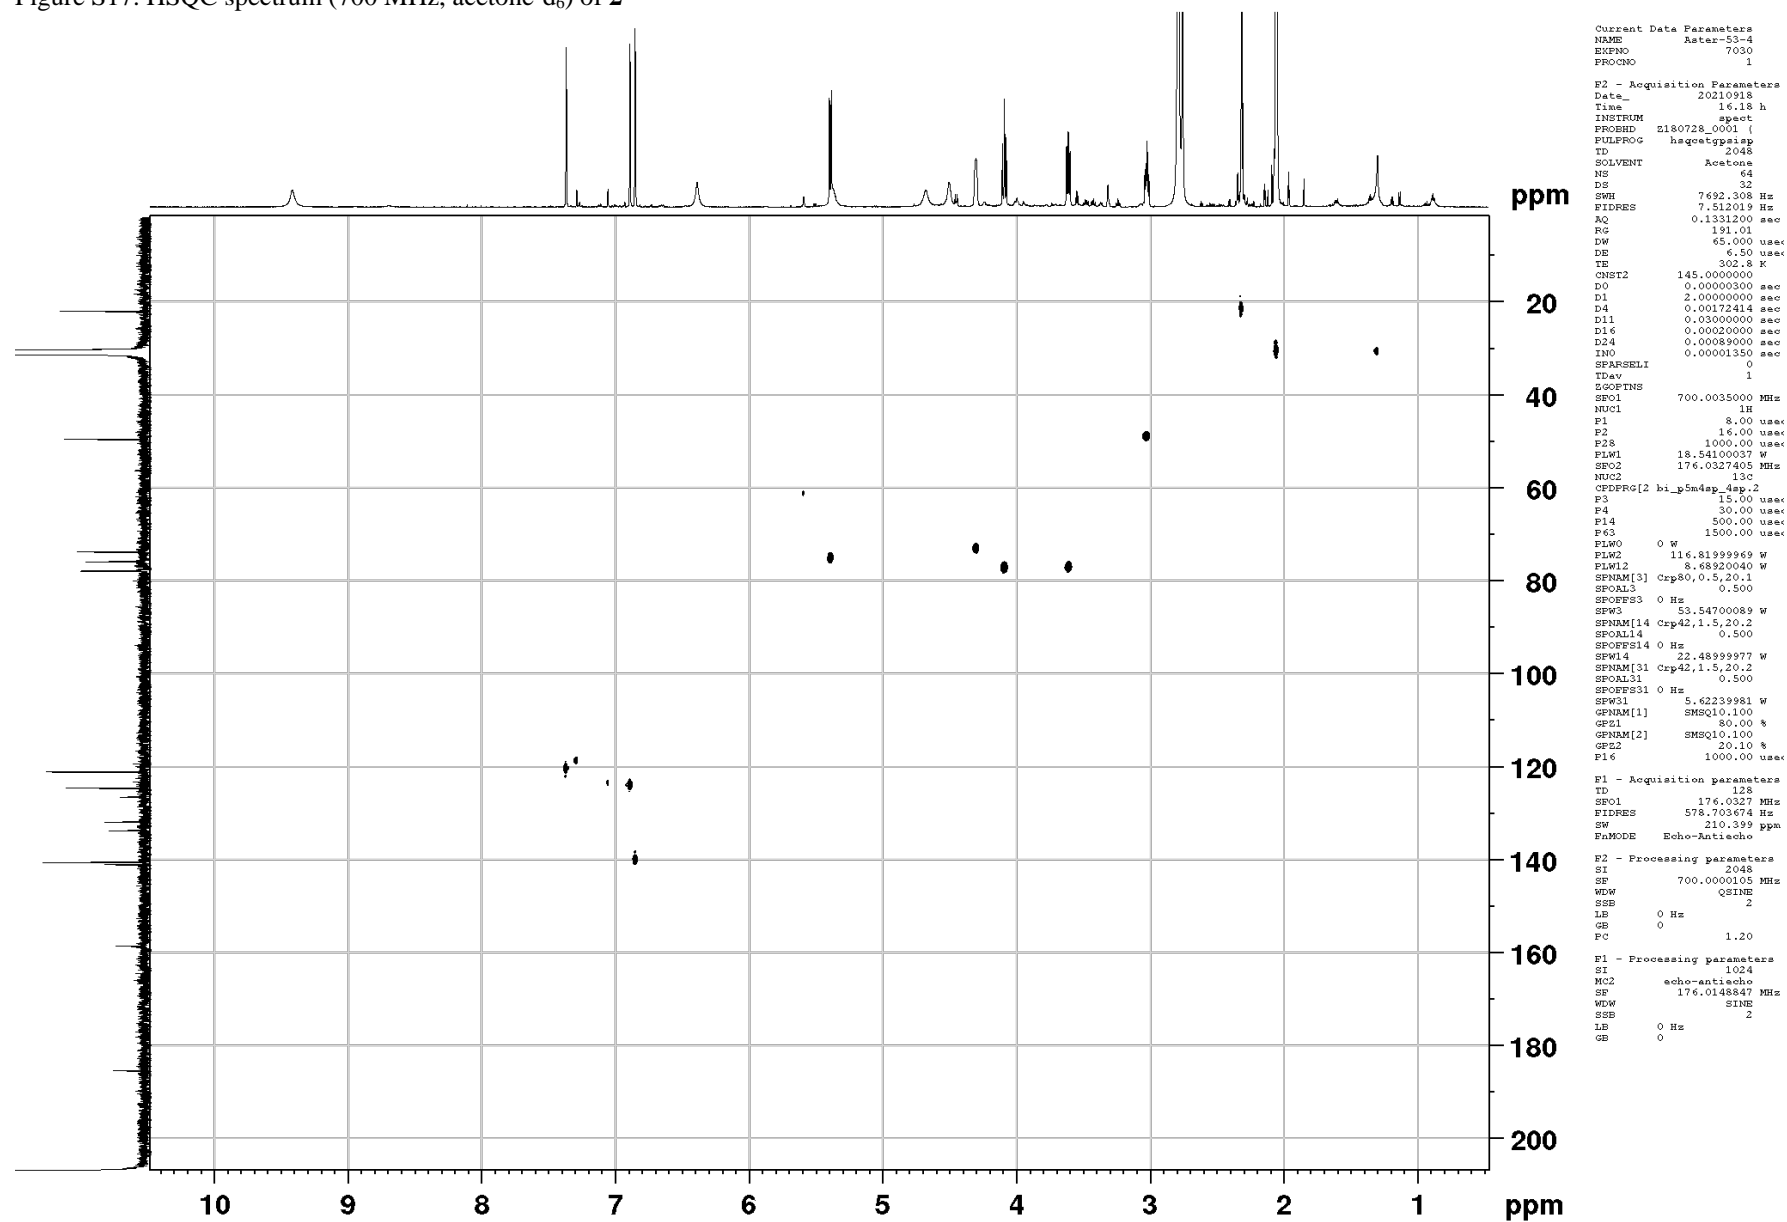

Figure S18. HMBC spectrum (700 MHz, acetone-d<sub>6</sub>) of **2**

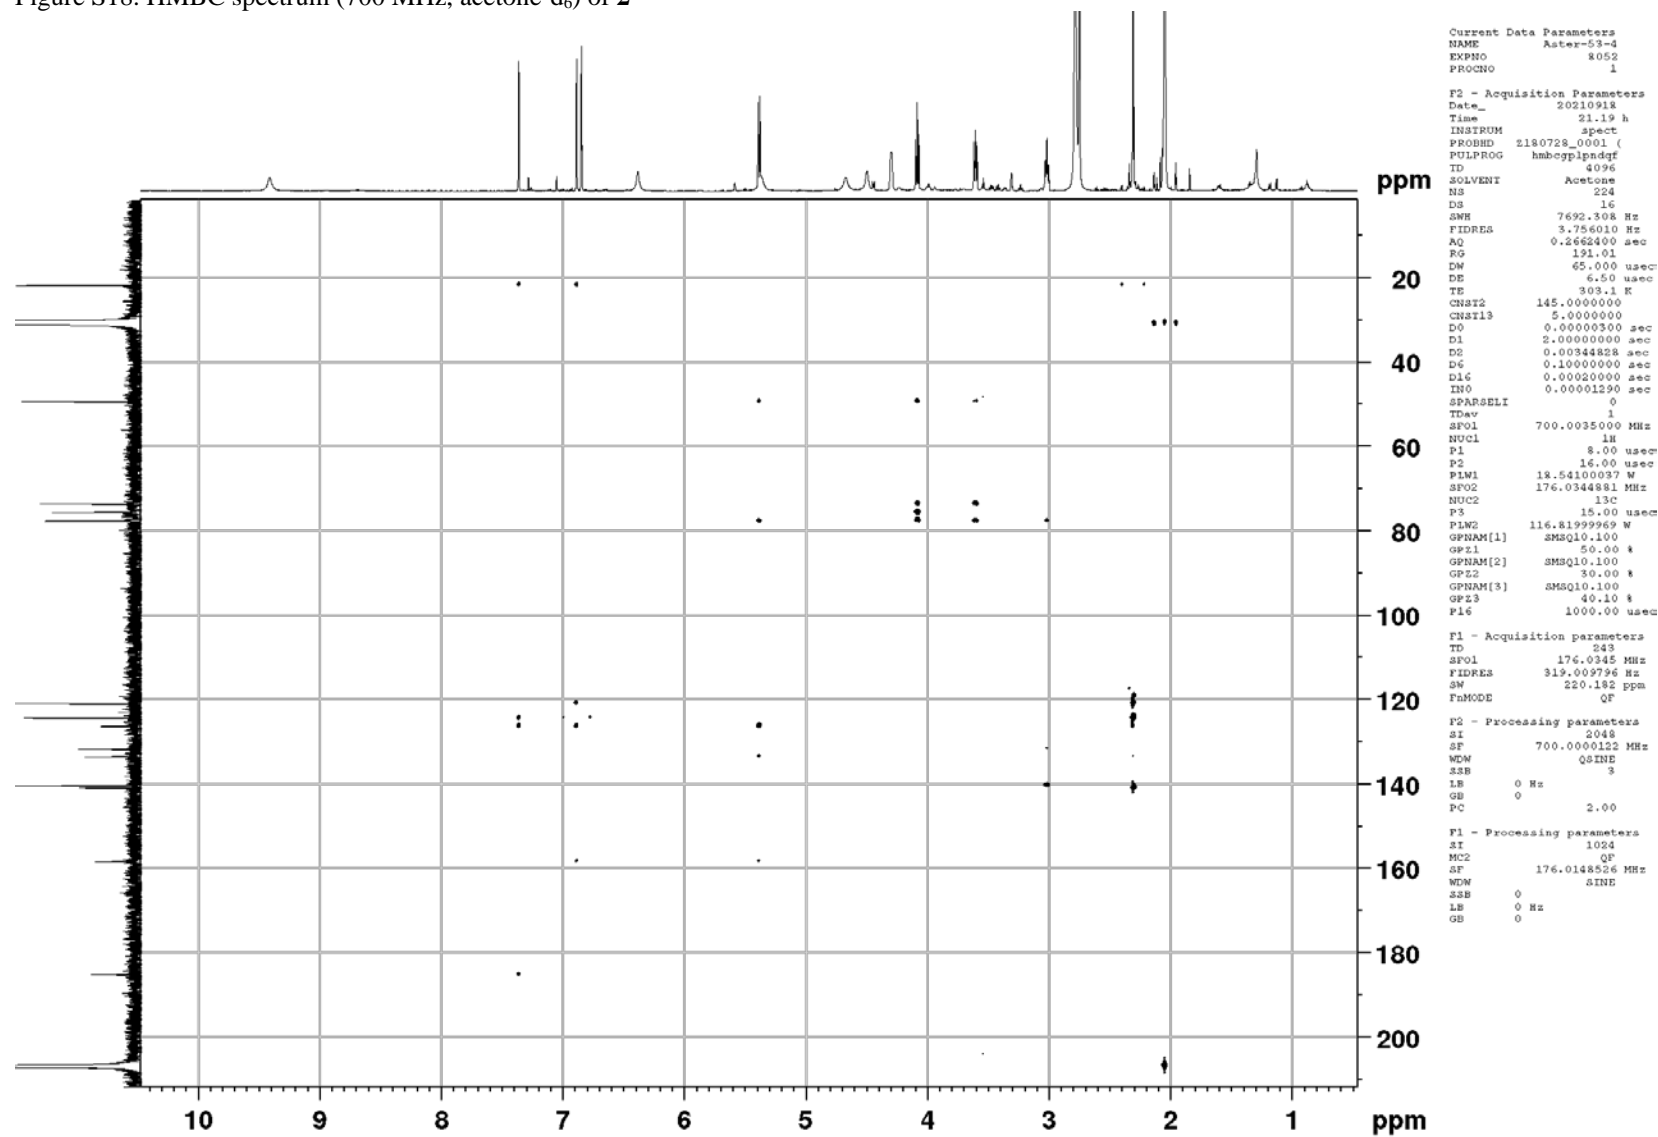

Figure S19. ROESY spectrum (700 MHz, acetone-d<sub>6</sub>) of **2**

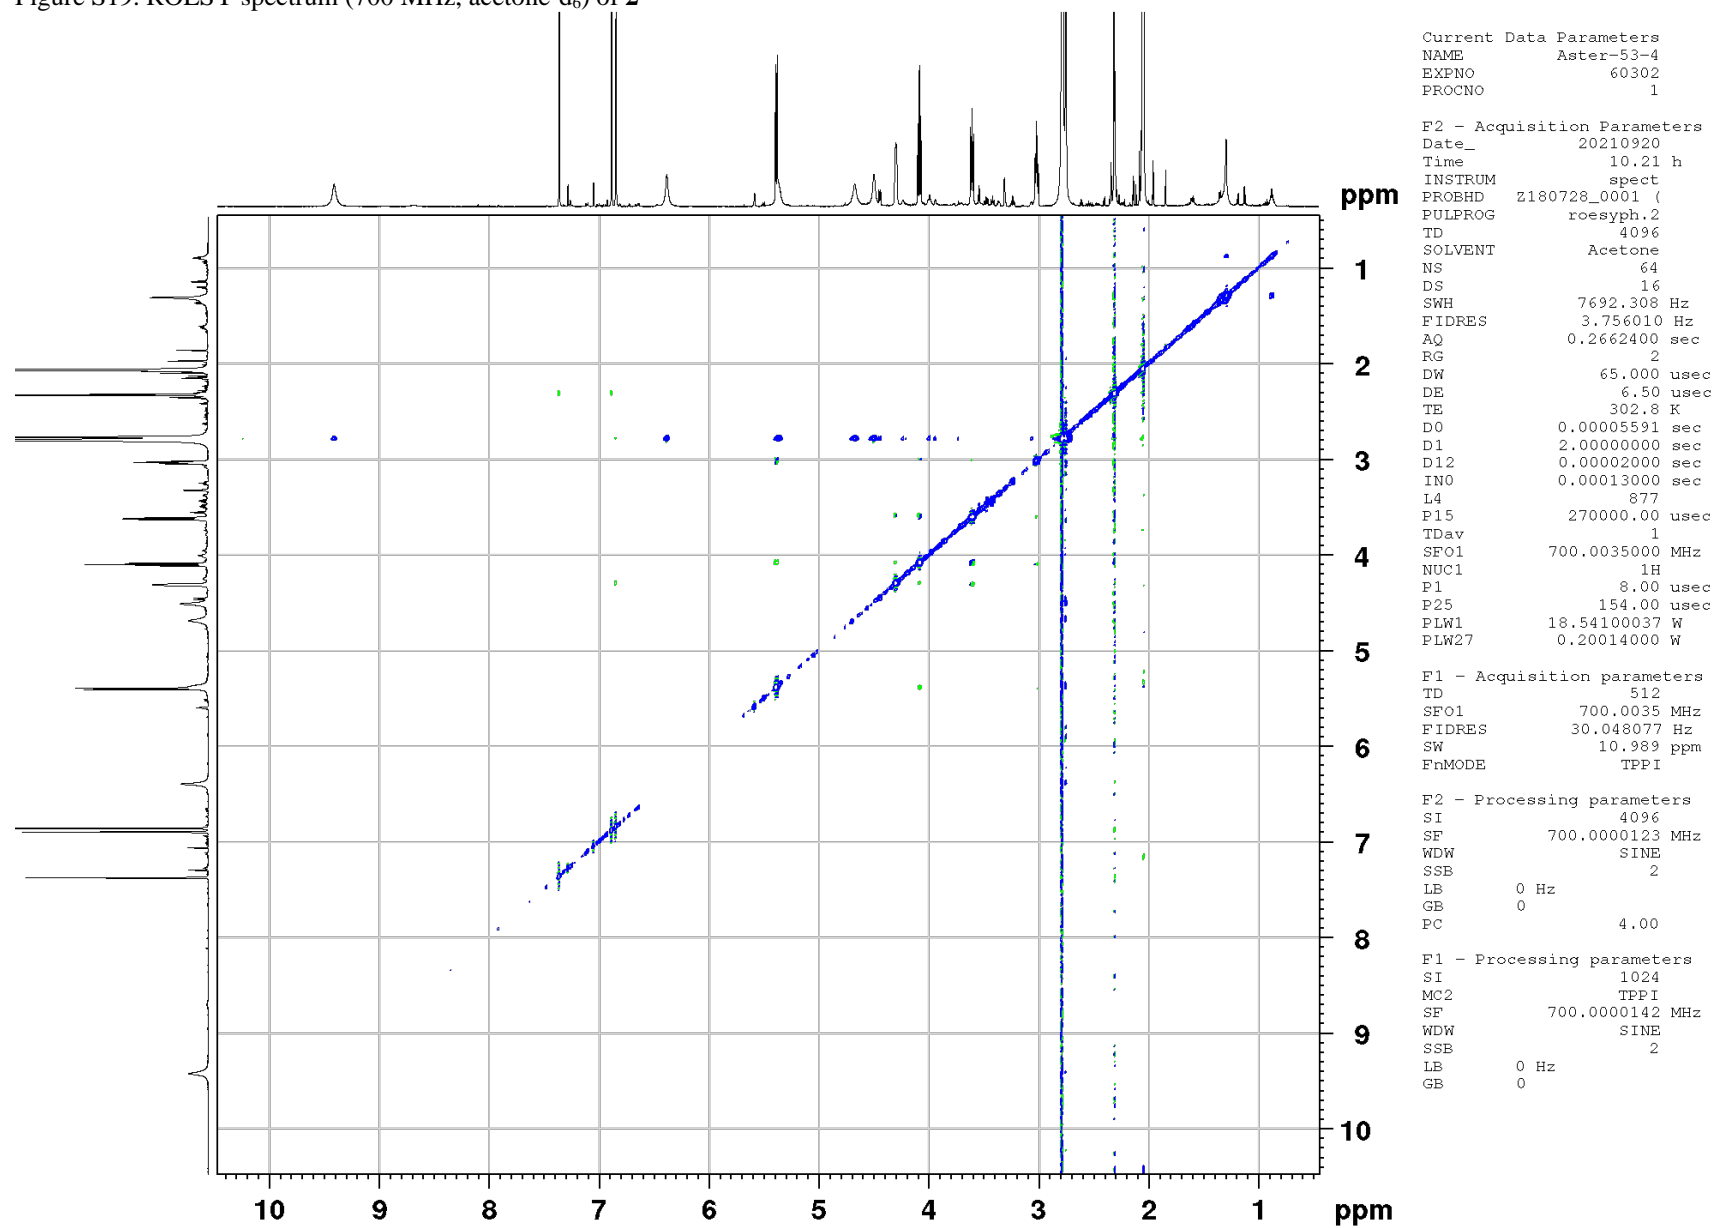

Figure S20.  $^1\text{H}$  NMR spectrum (700 MHz, acetone- $d_6$ ) of **3**

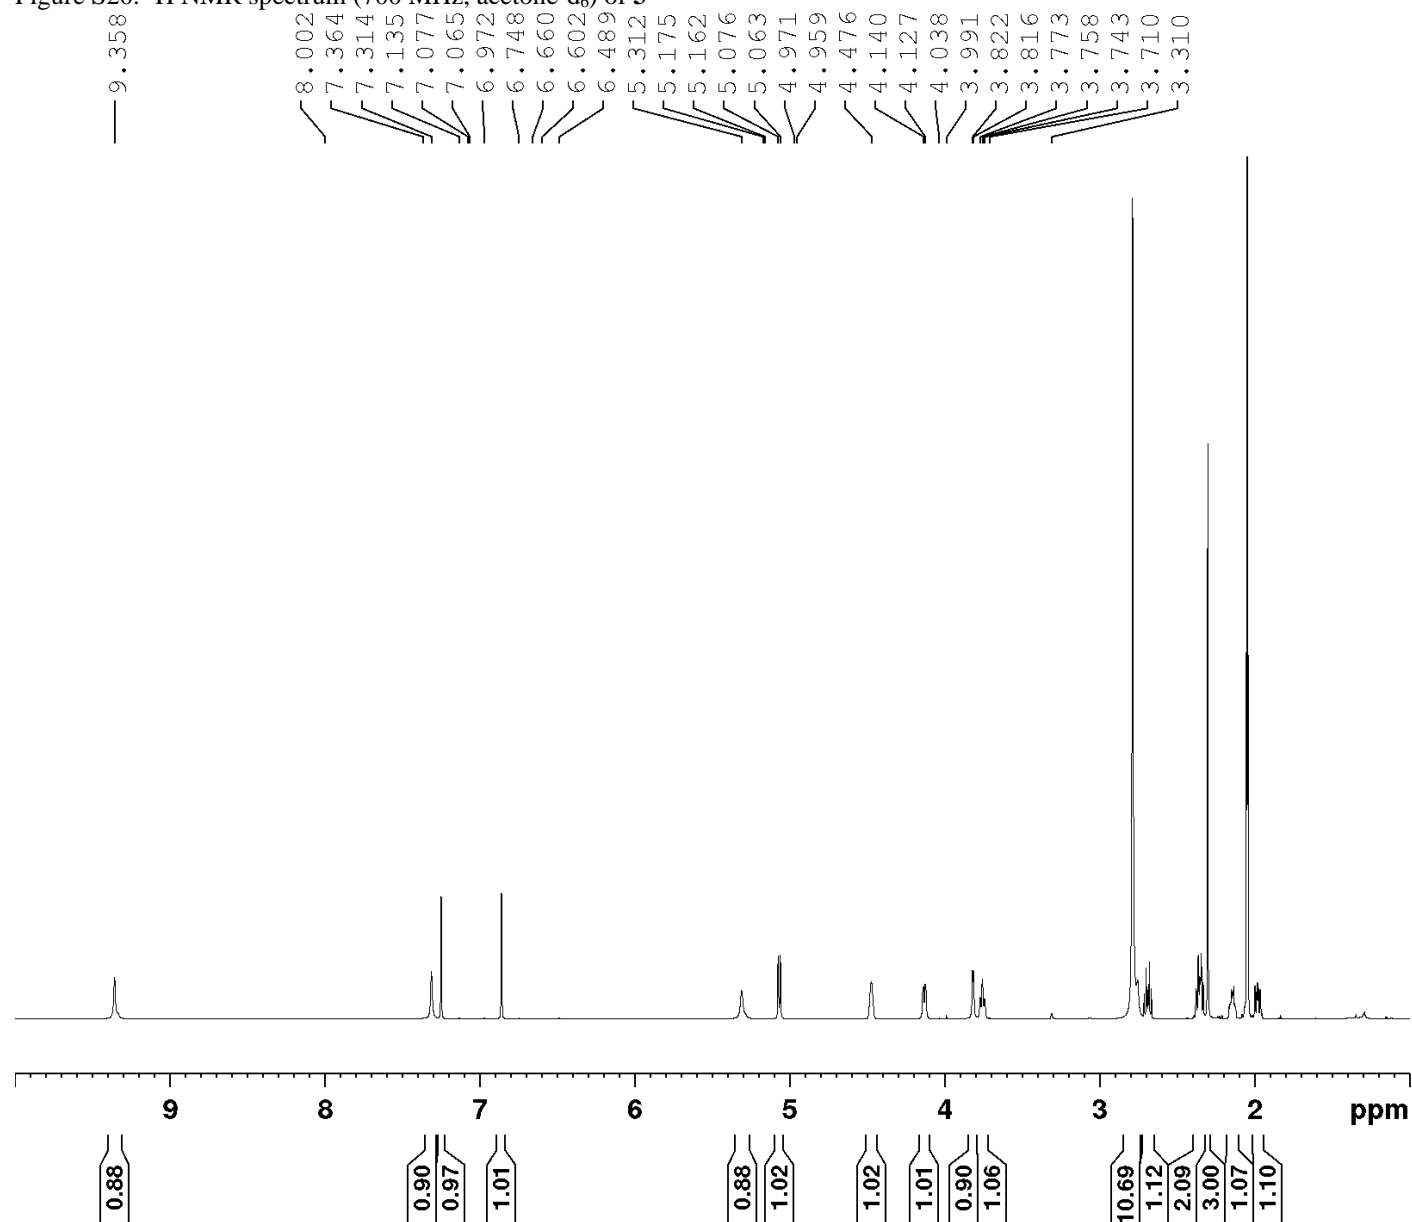

Current Data Parameters  
NAME Aster-45a  
EXPNO 32  
PROCNO 1

F2 - Acquisition Parameters  
Date\_ 20210924  
Time 12.15 h  
INSTRUM spect  
PROBHD Z180728\_0001 (  
PULPROG zg30  
TD 32768  
SOLVENT Acetone  
NS 120  
DS 4  
SWH 8417.509 Hz  
FIDRES 0.513764 Hz  
AQ 1.9464192 sec  
RG 165.68  
DW 59.400 usec  
DE 6.50 usec  
TE 302.9 K  
D1 2.00000000 sec  
TD0 1  
SF01 700.0035000 MHz  
NUC1 1H  
P0 2.67 usec  
P1 8.00 usec  
PLW1 18.54100037 W

F2 - Processing parameters  
SI 32768  
SF 700.0000119 MHz  
WDW EM  
SSB 0  
LB 0.30 Hz  
GB 0  
PC 4.00

Figure S21.  $^{13}\text{C}$  NMR spectrum (75.48 MHz, acetone- $\text{d}_6$ ) of **3**

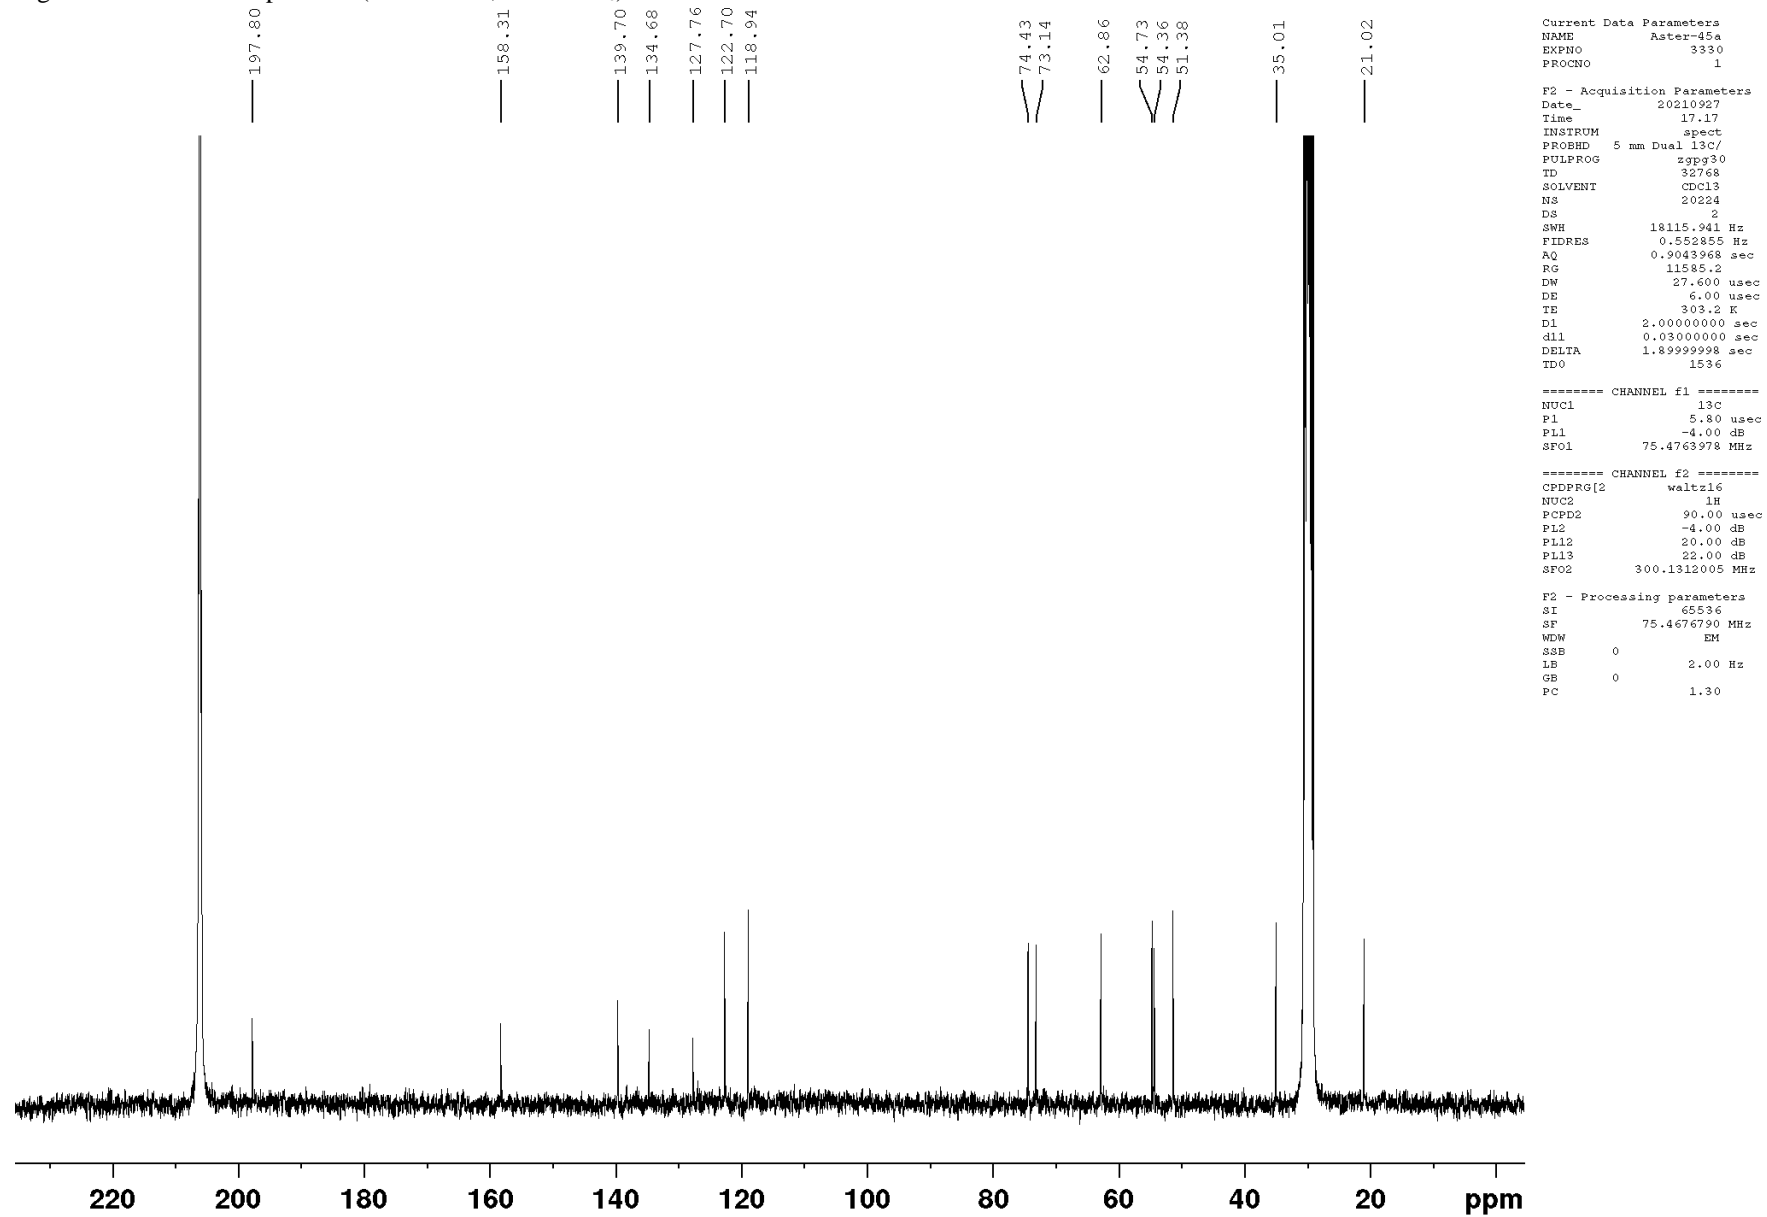

Figure S22. COSY-45 spectrum (700 MHz, acetone-d<sub>6</sub>) of **3**

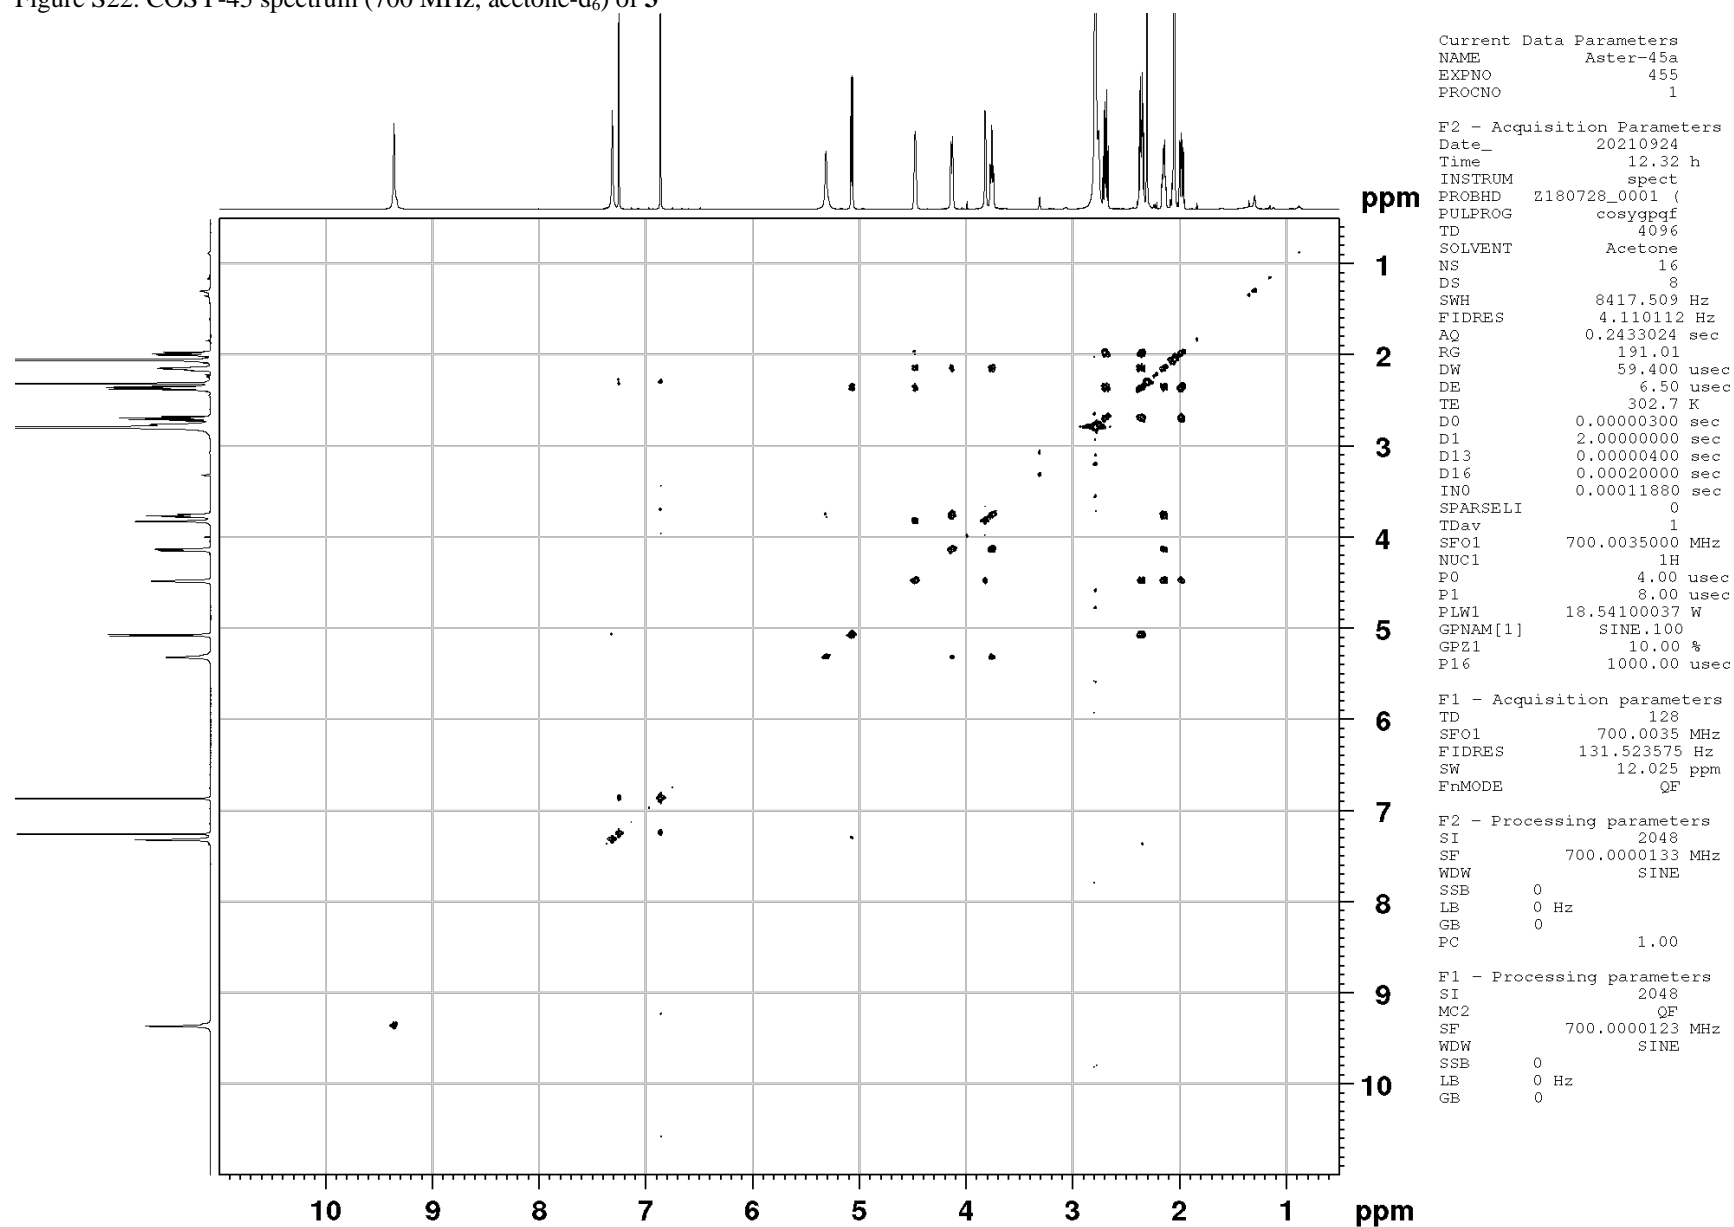

Figure S23. HSQC spectrum (700 MHz, acetone-d<sub>6</sub>) of **3**

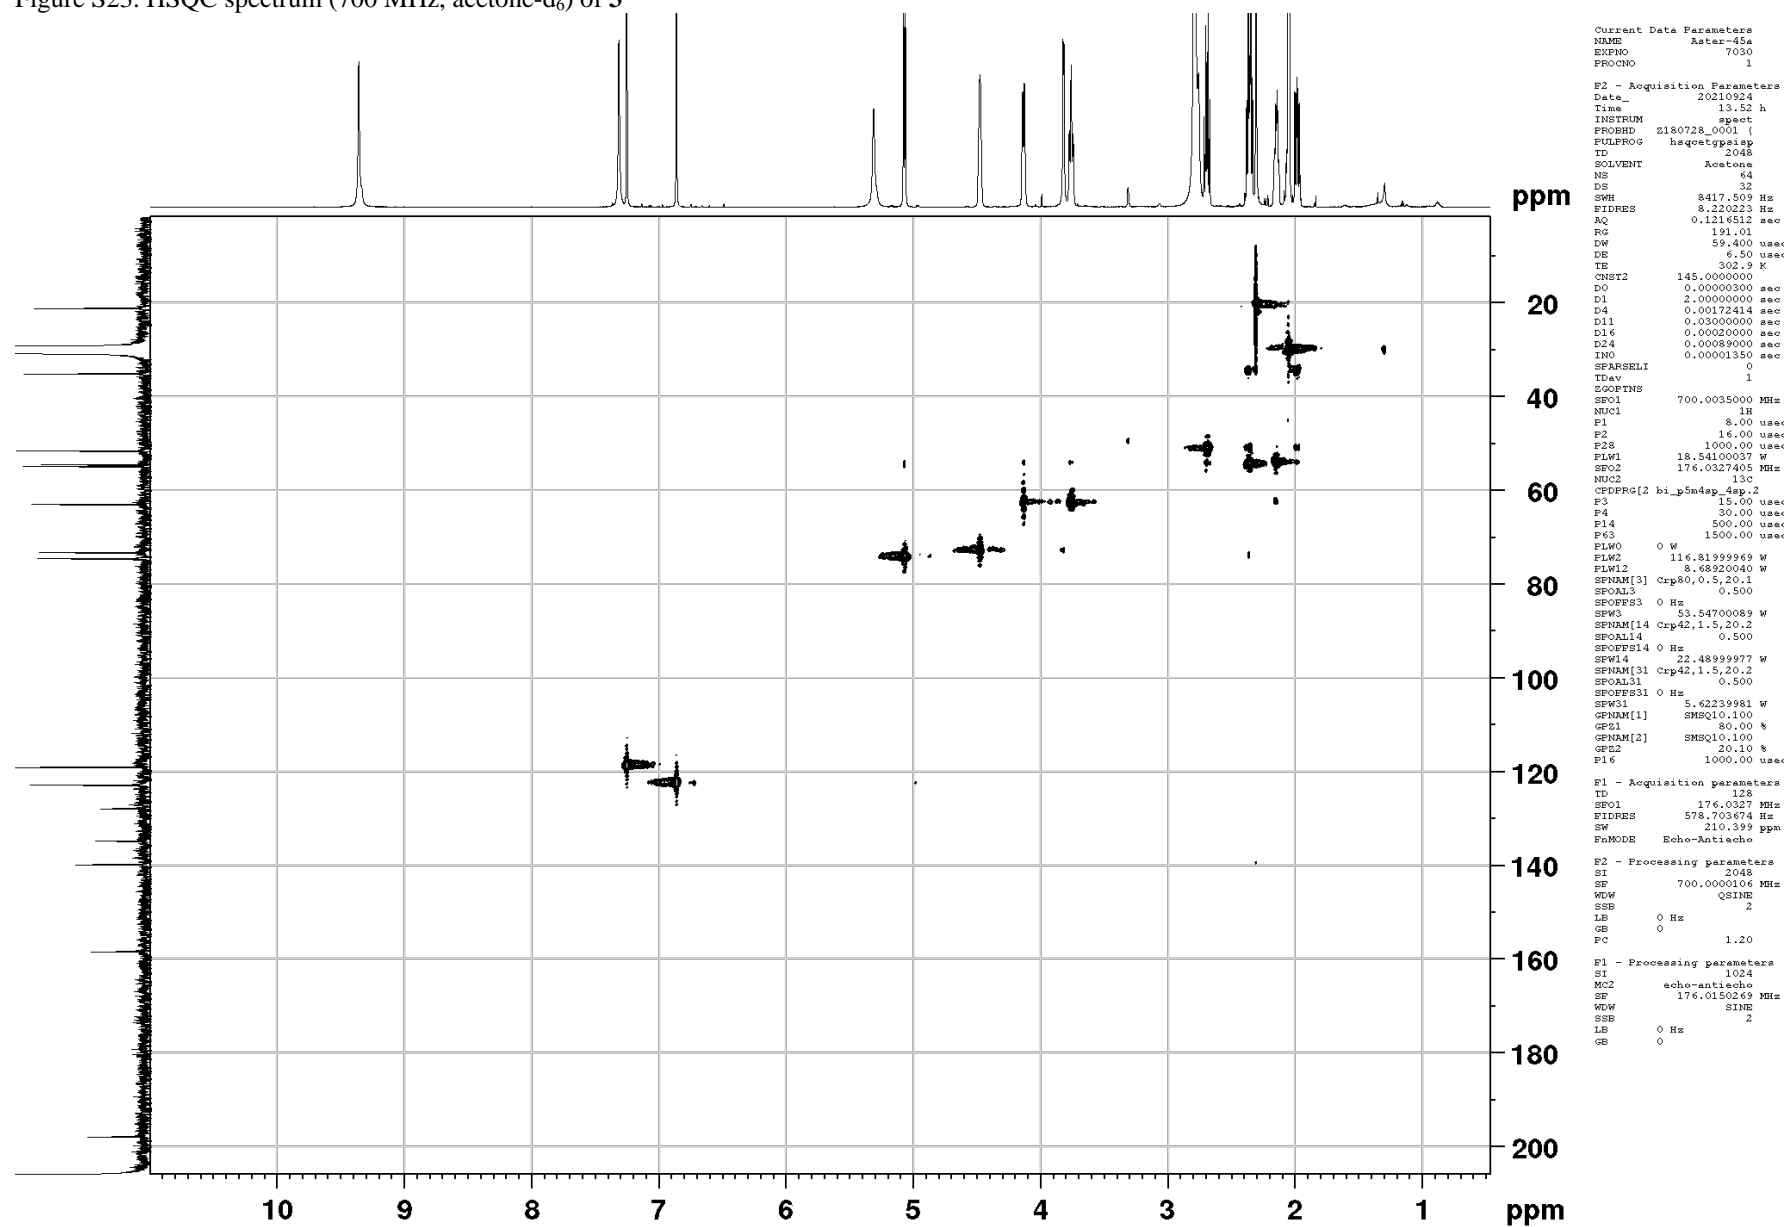



Figure S24. HMBC spectrum (700 MHz, acetone-d<sub>6</sub>) of **3**

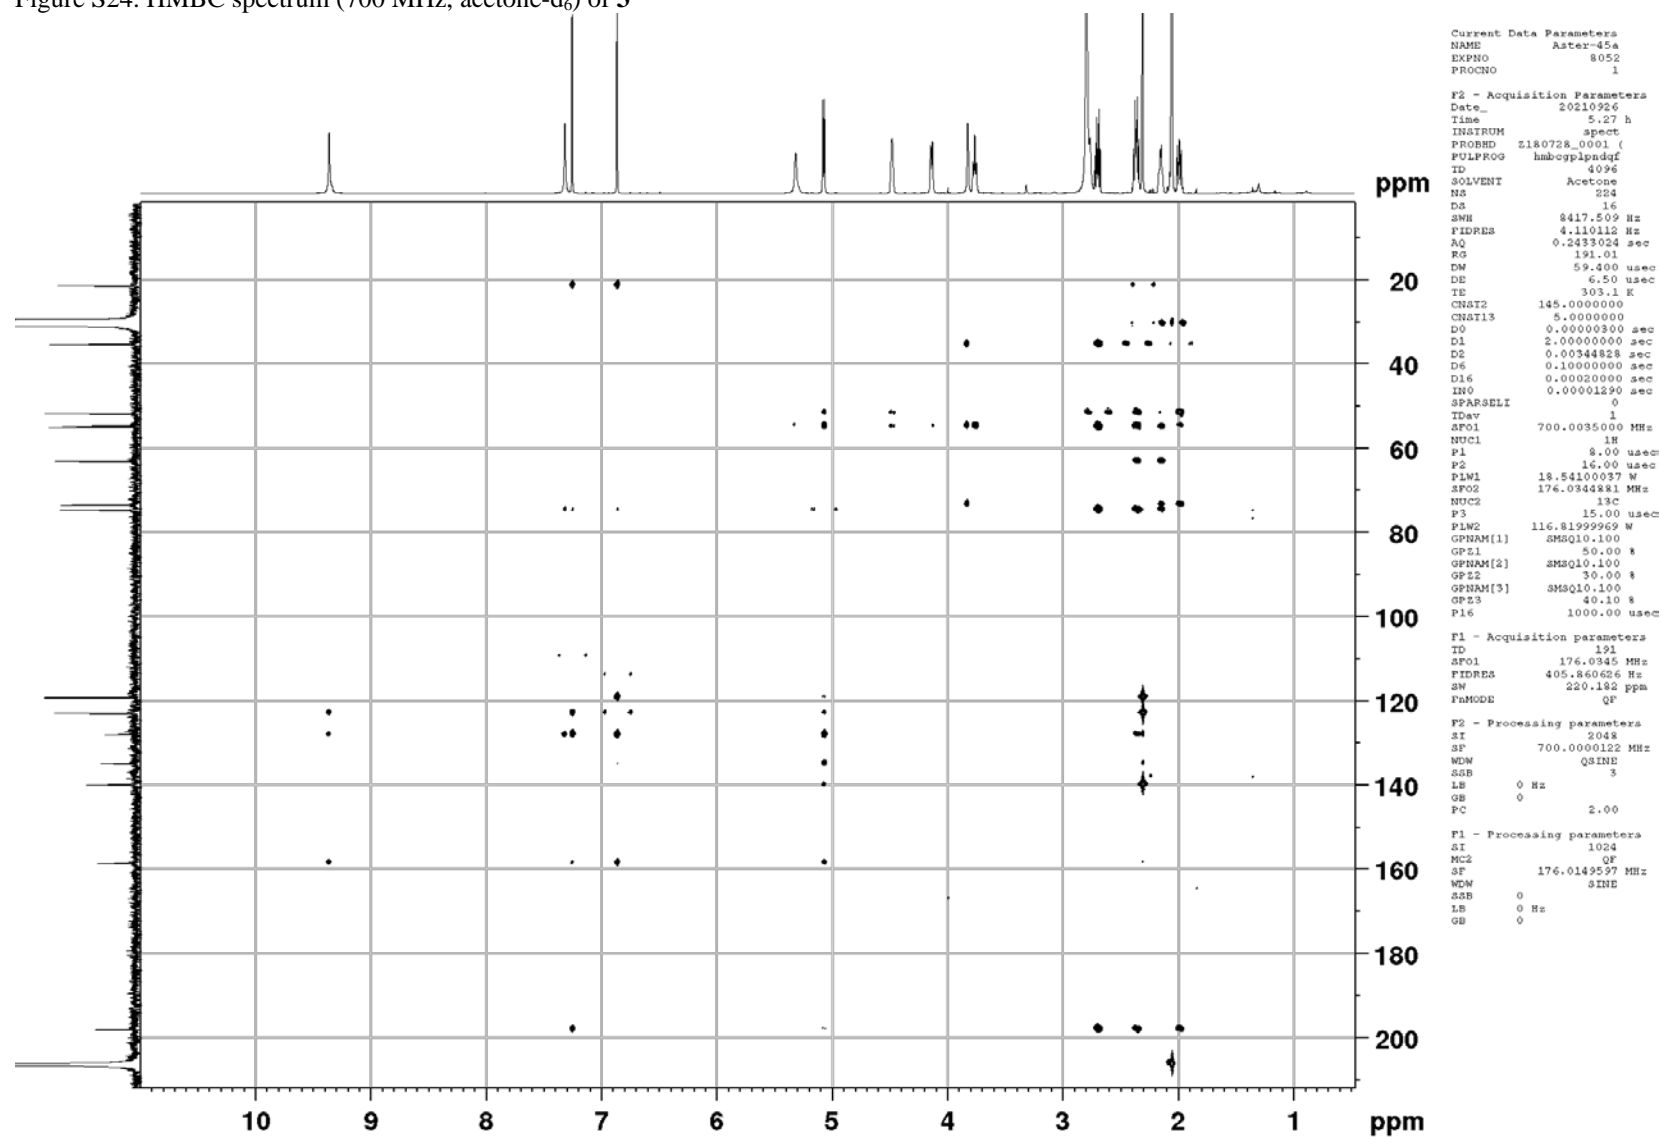

Current Data Parameters  
NAME Aster-45a  
EXPNO 8052  
PROCNO 1

F2 - Acquisition Parameters  
Date\_ 20210926  
Time 5:27 h  
INSTRUM spect  
PROBHD Z190728\_0001 (

PULPROG hmcgppipndgfi  
ID 4096  
SOLVENT Acetone  
NS 224  
DS 16  
SMH 8417.509 Hz  
FIDRES 4.110112 Hz  
AQ 0.2433024 sec  
RG 191.01  
DM 59.400 usec  
DE 6.50 usec  
TE 303.1 K  
CNS12 145.0000000  
CNS13 5.0000000  
D0 0.00000300 sec  
D1 2.00000000 sec  
D2 0.00344828 sec  
D4 0.10000000 sec  
D16 0.00020000 sec  
INO 0.00001290 sec  
SPARSELI 0  
TDav 1  
SF01 700.0035000 MHz  
NUC1 1H  
P1 8.00 usec  
P2 16.00 usec  
PLW1 18.54100037 W  
SF02 176.0344881 MHz  
NUC2 13C  
P3 15.00 usec  
PLW2 116.81999969 W  
GPNAM[1] SMSQ10.100  
GP11 50.00 %  
GPNAM[2] SMSQ10.100  
GP12 30.00 %  
GPNAM[3] SMSQ10.100  
GP13 40.10 %  
PL6 1000.00 usec

F1 - Acquisition parameters  
TD 191  
SF01 176.0345 MHz  
FIDRES 405.860626 Hz  
SW 220.182 ppm  
F0MODE QF

F2 - Processing parameters  
SI 2048  
SF 700.0000122 MHz  
WDW Q3INE  
SSB 3  
LB 0 Hz  
GB 0  
PC 2.00

F1 - Processing parameters  
SI 1024  
MC2 QF  
SF 176.0149597 MHz  
WDW SINE  
SSB 0  
LB 0 Hz  
GB 0

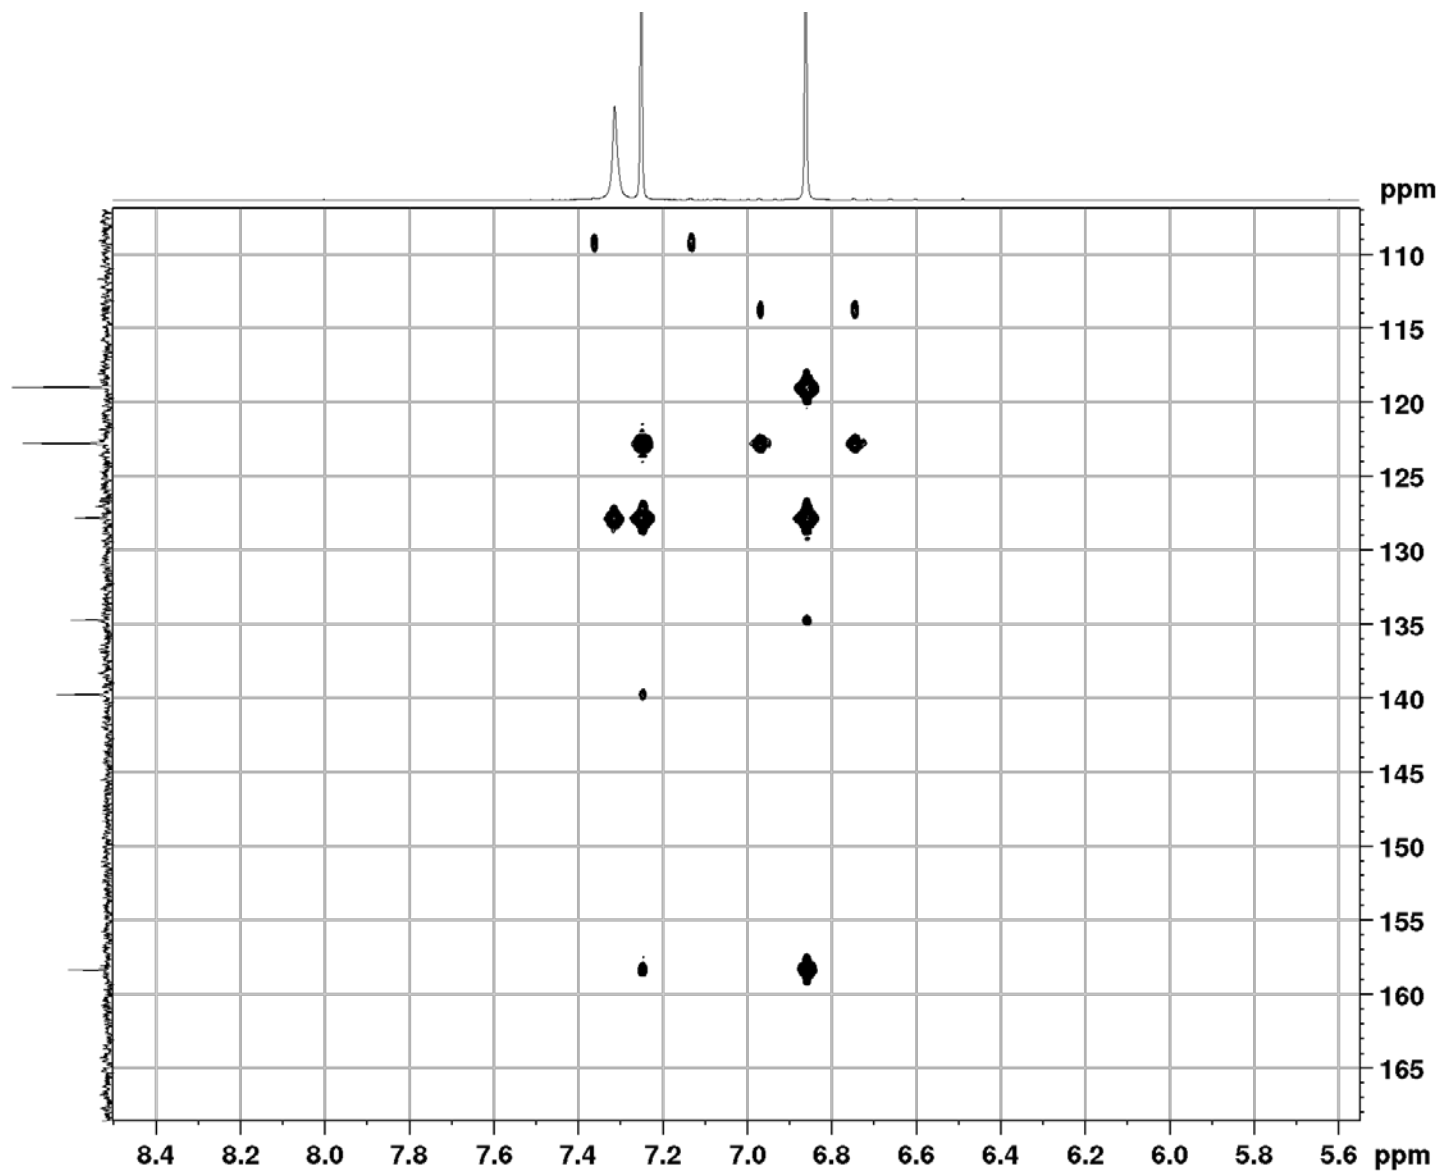

Figure S25. ROESY spectrum (700 MHz, acetone-d<sub>6</sub>) of **3**

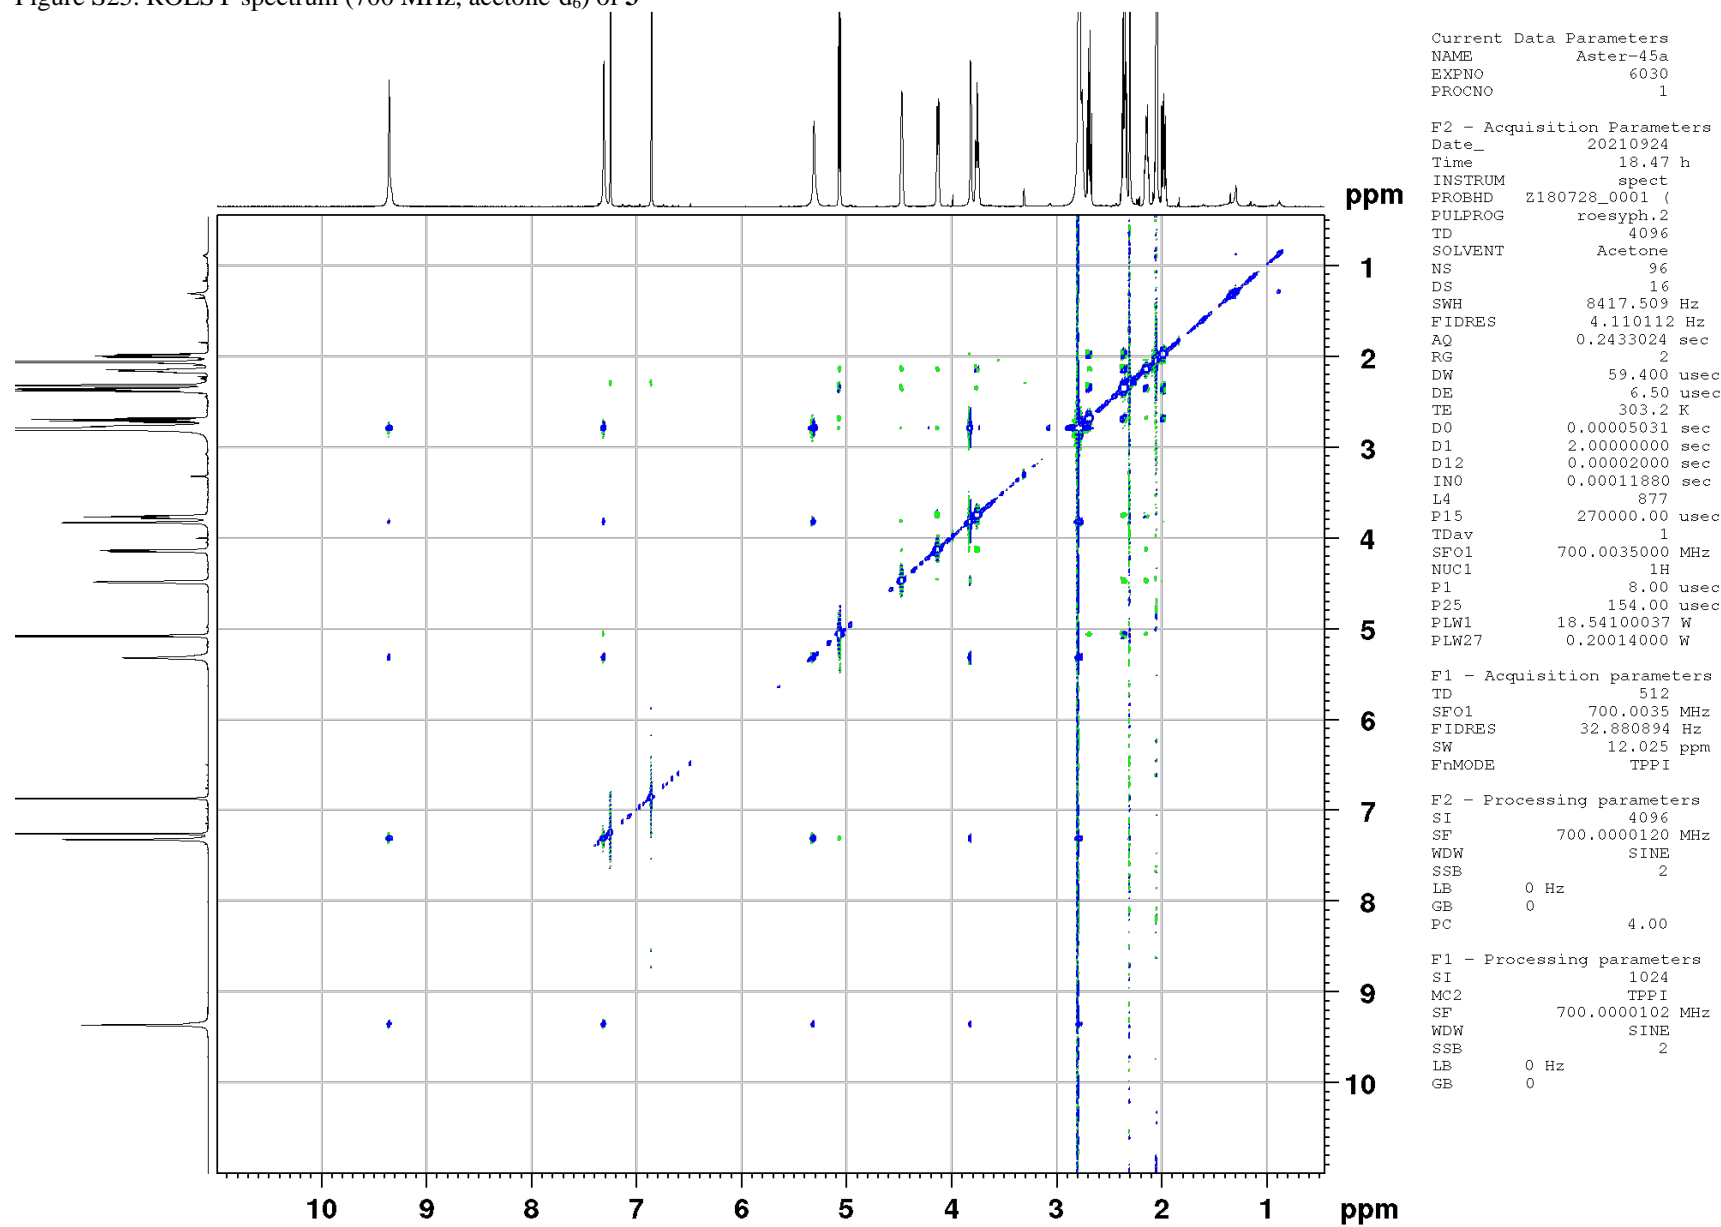

Figure S26. <sup>1</sup>H spectrum (500 MHz, acetone-d<sub>6</sub>) of **4**

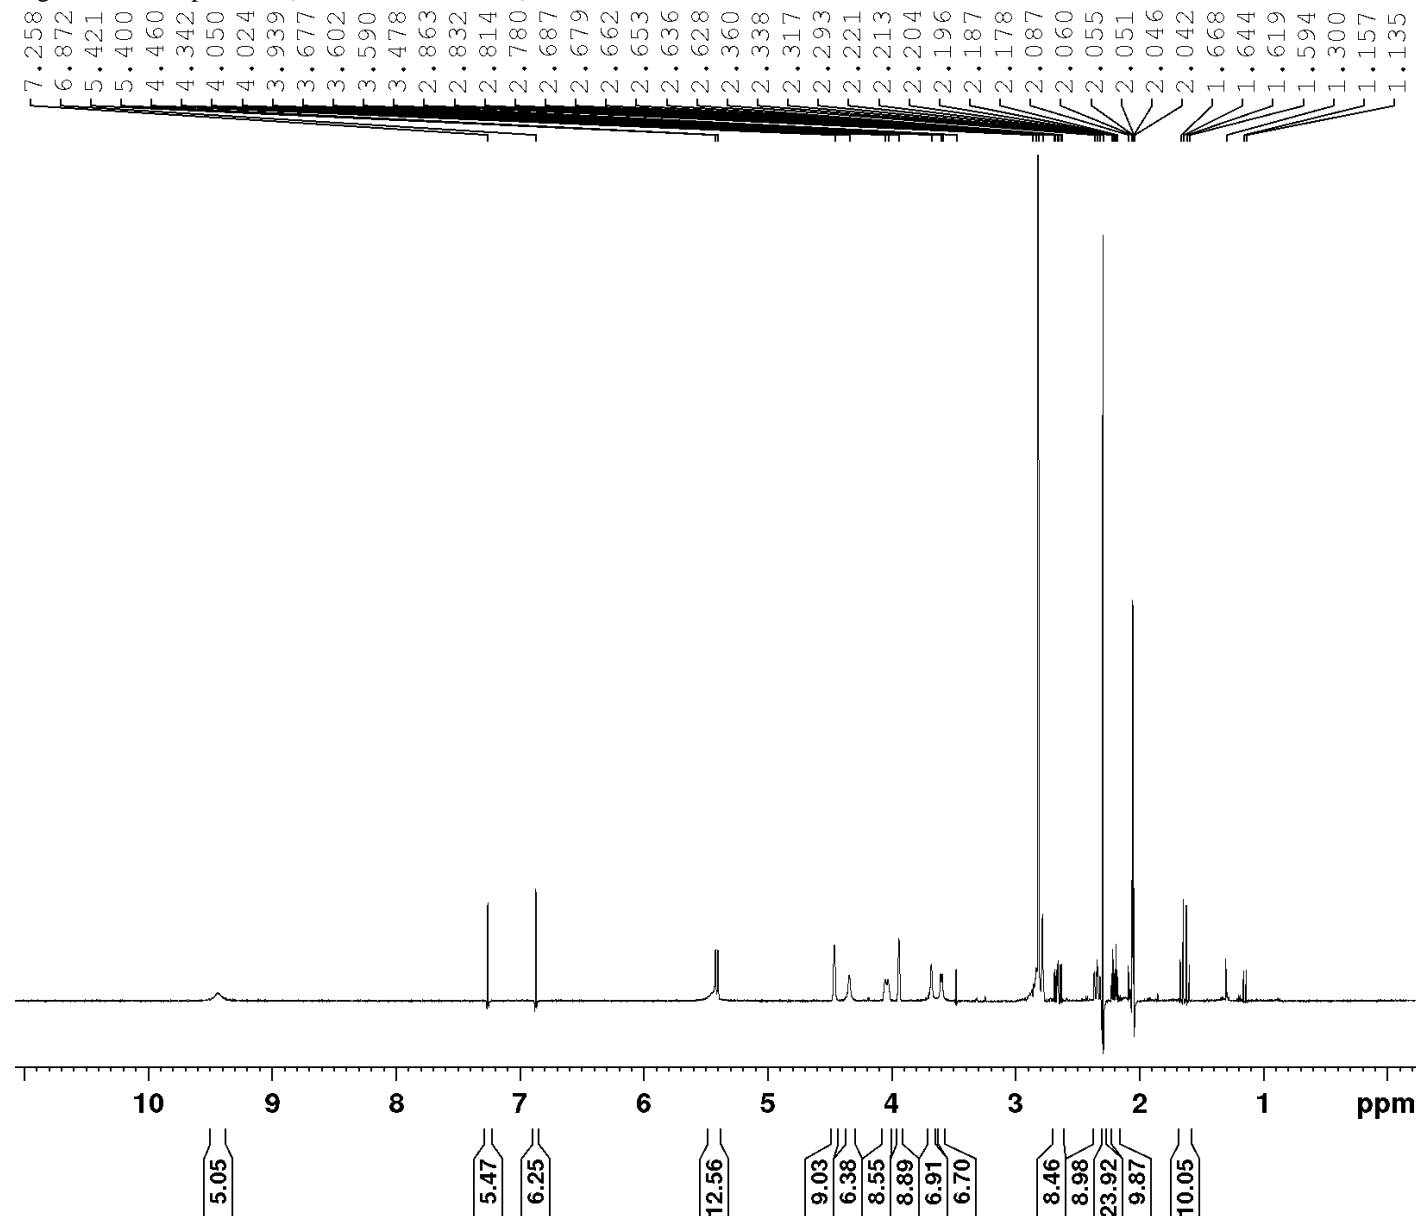

Current Data Parameters  
NAME Aster-53-1  
EXPNO 40  
PROCNO 1

F2 - Acquisition Parameters  
Date\_ 20210914  
Time 12.04 h  
INSTRUM spect  
PROBHD Z113652\_0155 (  
PULPROG zg  
TD 32768  
SOLVENT Acetone  
NS 1  
DS 2  
SWH 5656.108 Hz  
FIDRES 0.345221 Hz  
AQ 2.8966911 sec  
RG 91.04  
DW 88.400 usec  
DE 6.50 usec  
TE 303.2 K  
D1 1.00000000 sec  
TD0 1  
SFO1 500.1327246 MHz  
NUC1 1H  
P1 12.00 usec  
PLW1 15.84899998 W

F2 - Processing parameters  
SI 65536  
SF 500.1300133 MHz  
WDW GM  
SSB 0  
LB -2.50 Hz  
GB 0.1  
PC 3.00

Figure S27.  $^{13}\text{C}$  spectrum (125.77 MHz, acetone- $\text{d}_6$ ) of **4**

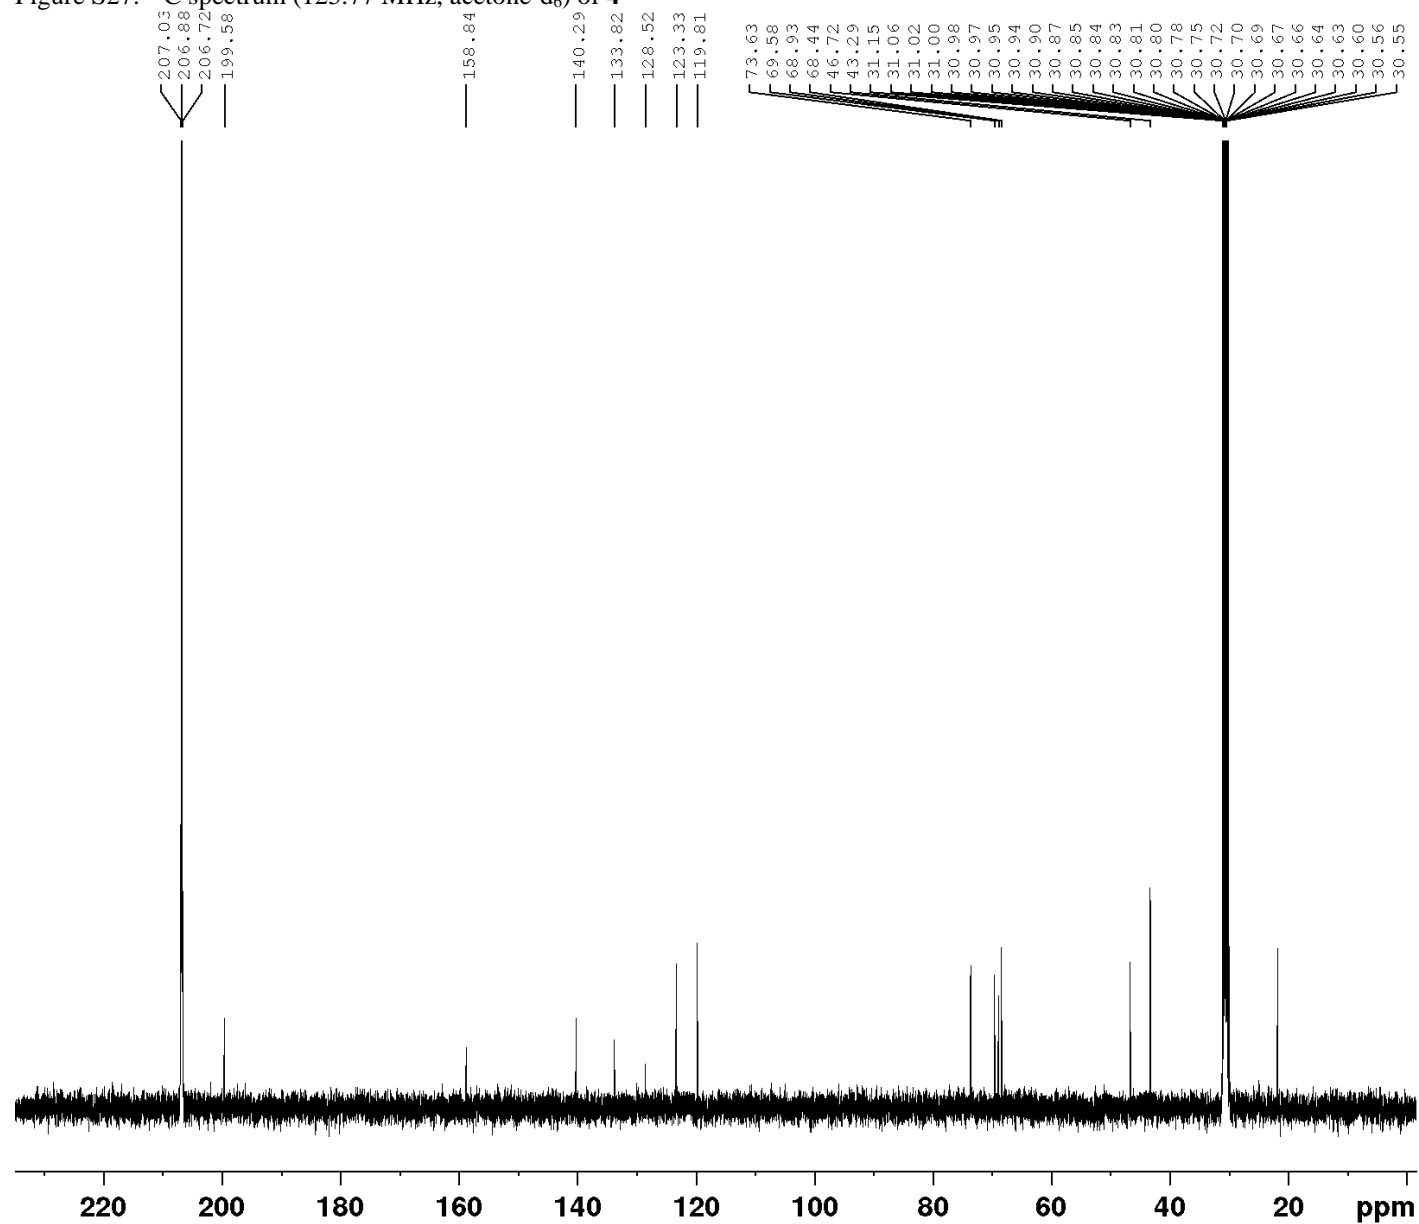

Current Data Parameters  
 NAME Aster-53-1  
 EXPNO 3130  
 PROCNO 1

F2 - Acquisition Parameters  
 Date\_ 20210909  
 Time 10.49 h  
 INSTRUM spect  
 PROBHD Z113652\_0155 (  
 PULPROG zgpg30  
 TD 32768  
 SOLVENT Acetone  
 NS 1094  
 DS 4  
 SWH 29761.904 Hz  
 FIDRES 1.816522 Hz  
 AQ 0.5505024 sec  
 RG 196.84  
 DW 16.800 usec  
 DE 6.50 usec  
 TE 303.1 K  
 D1 2.00000000 sec  
 D11 0.03000000 sec  
 TD0 4096  
 SFO1 125.7722511 MHz  
 NUC1  $^{13}\text{C}$   
 P0 3.96 usec  
 P1 11.88 usec  
 PLW1 79.43299866 W  
 SFO2 500.1325007 MHz  
 NUC2  $^1\text{H}$   
 CPDPRG[2] waltz16  
 PCPD2 80.00 usec  
 PLW2 15.84899998 W  
 PLW12 0.33610001 W  
 PLW13 0.16906001 W

F2 - Processing parameters  
 SI 65536  
 SF 125.7575780 MHz  
 WDW EM  
 SSB 0  
 LB 1.00 Hz  
 GB 0  
 PC 1.40

Figure S28. DEPT-135 NMR spectrum (125.77 MHz, acetone-d<sub>6</sub>) of **4**

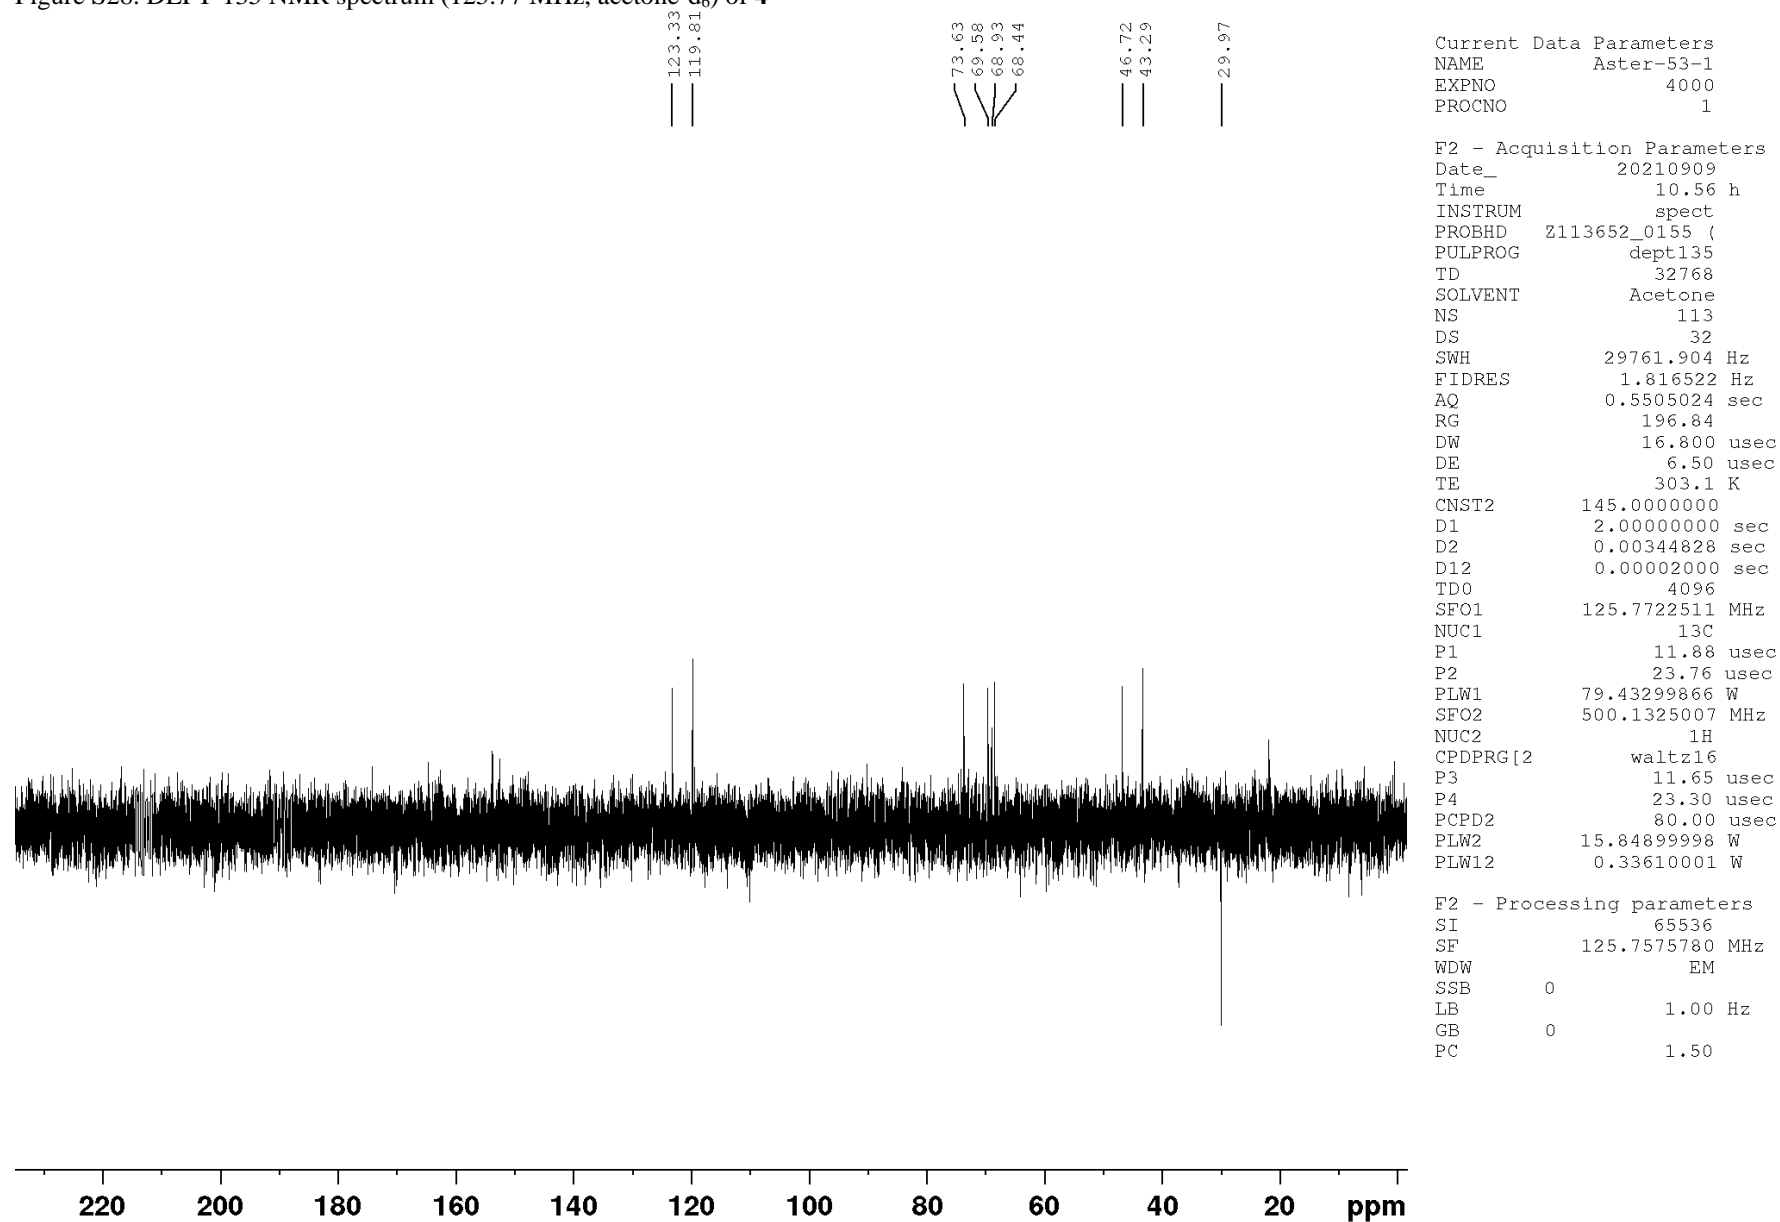

Figure S29. COSY-45 spectrum (500 MHz, acetone-d<sub>6</sub>) of **4**

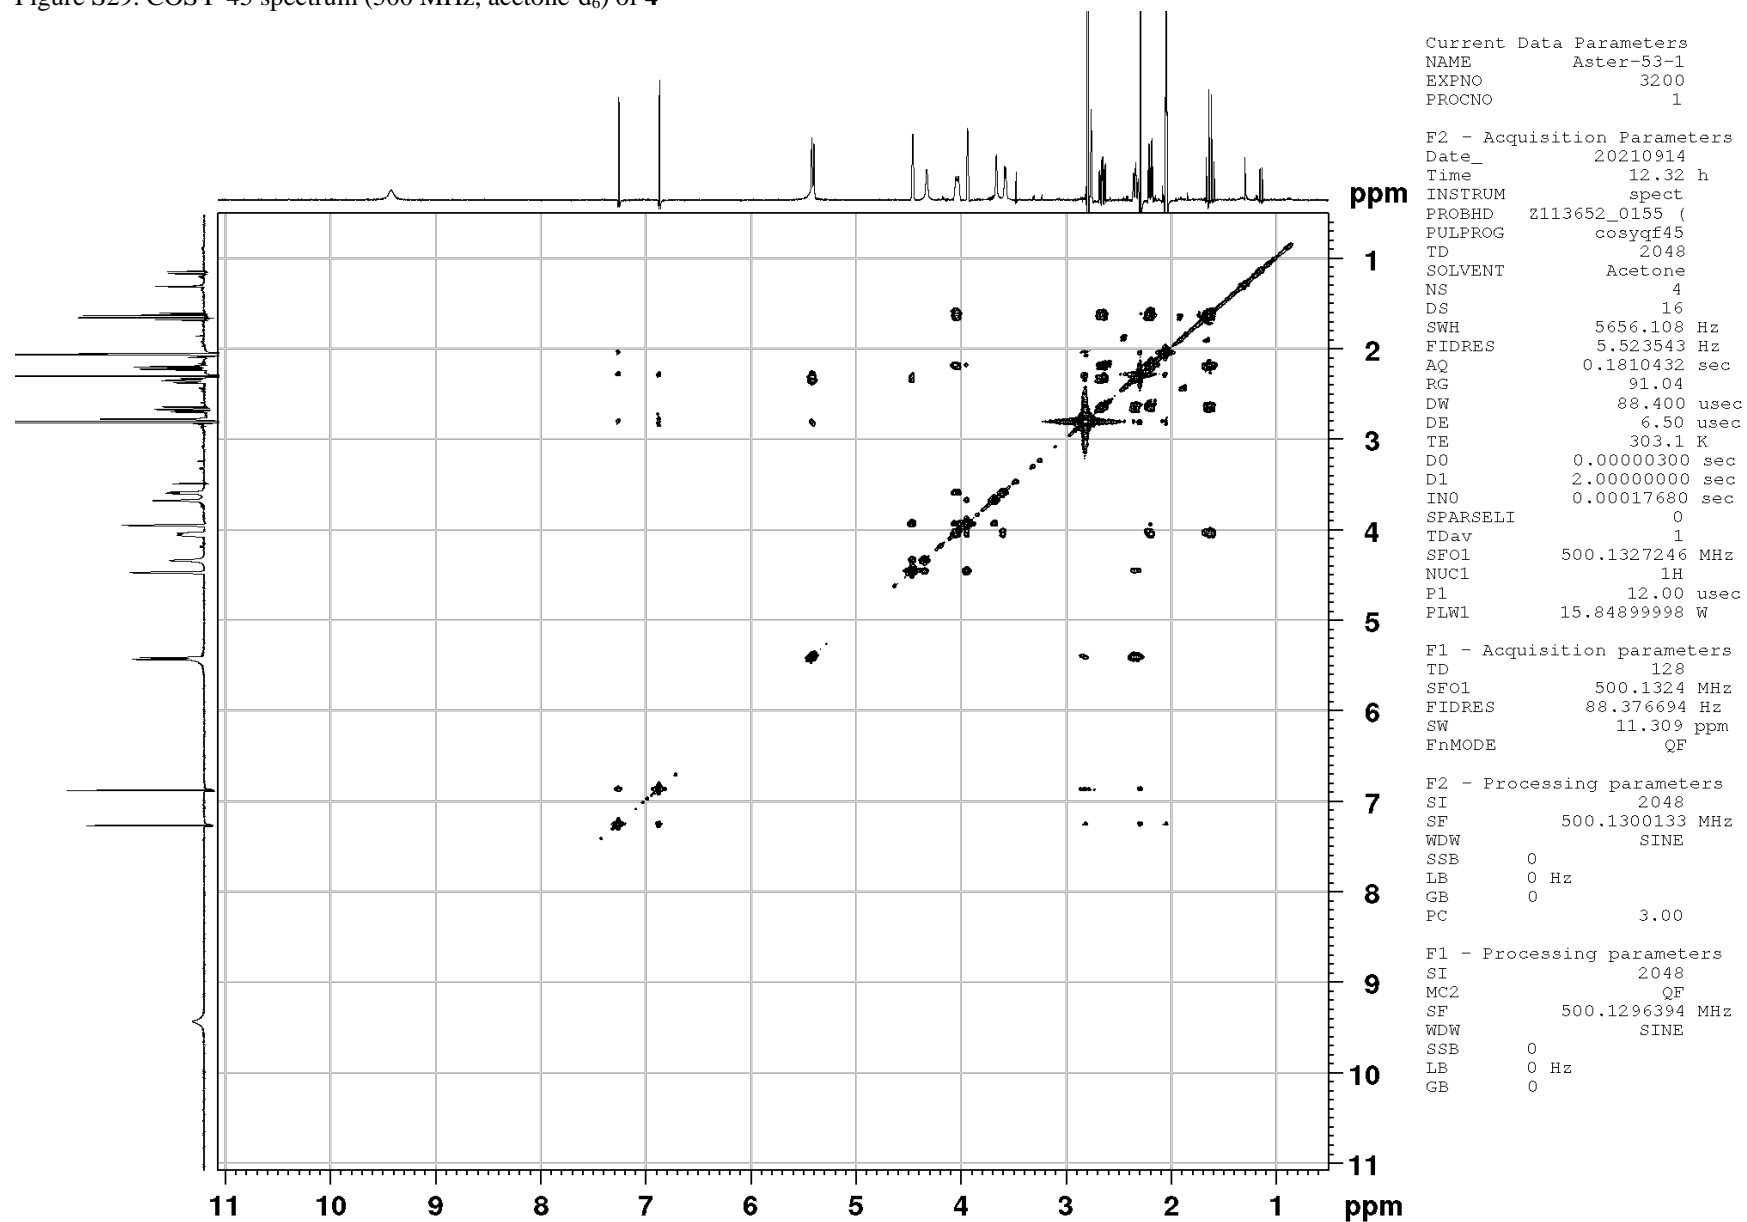

Figure S30. HSQC spectrum (500 MHz, acetone-d<sub>6</sub>) of **4**

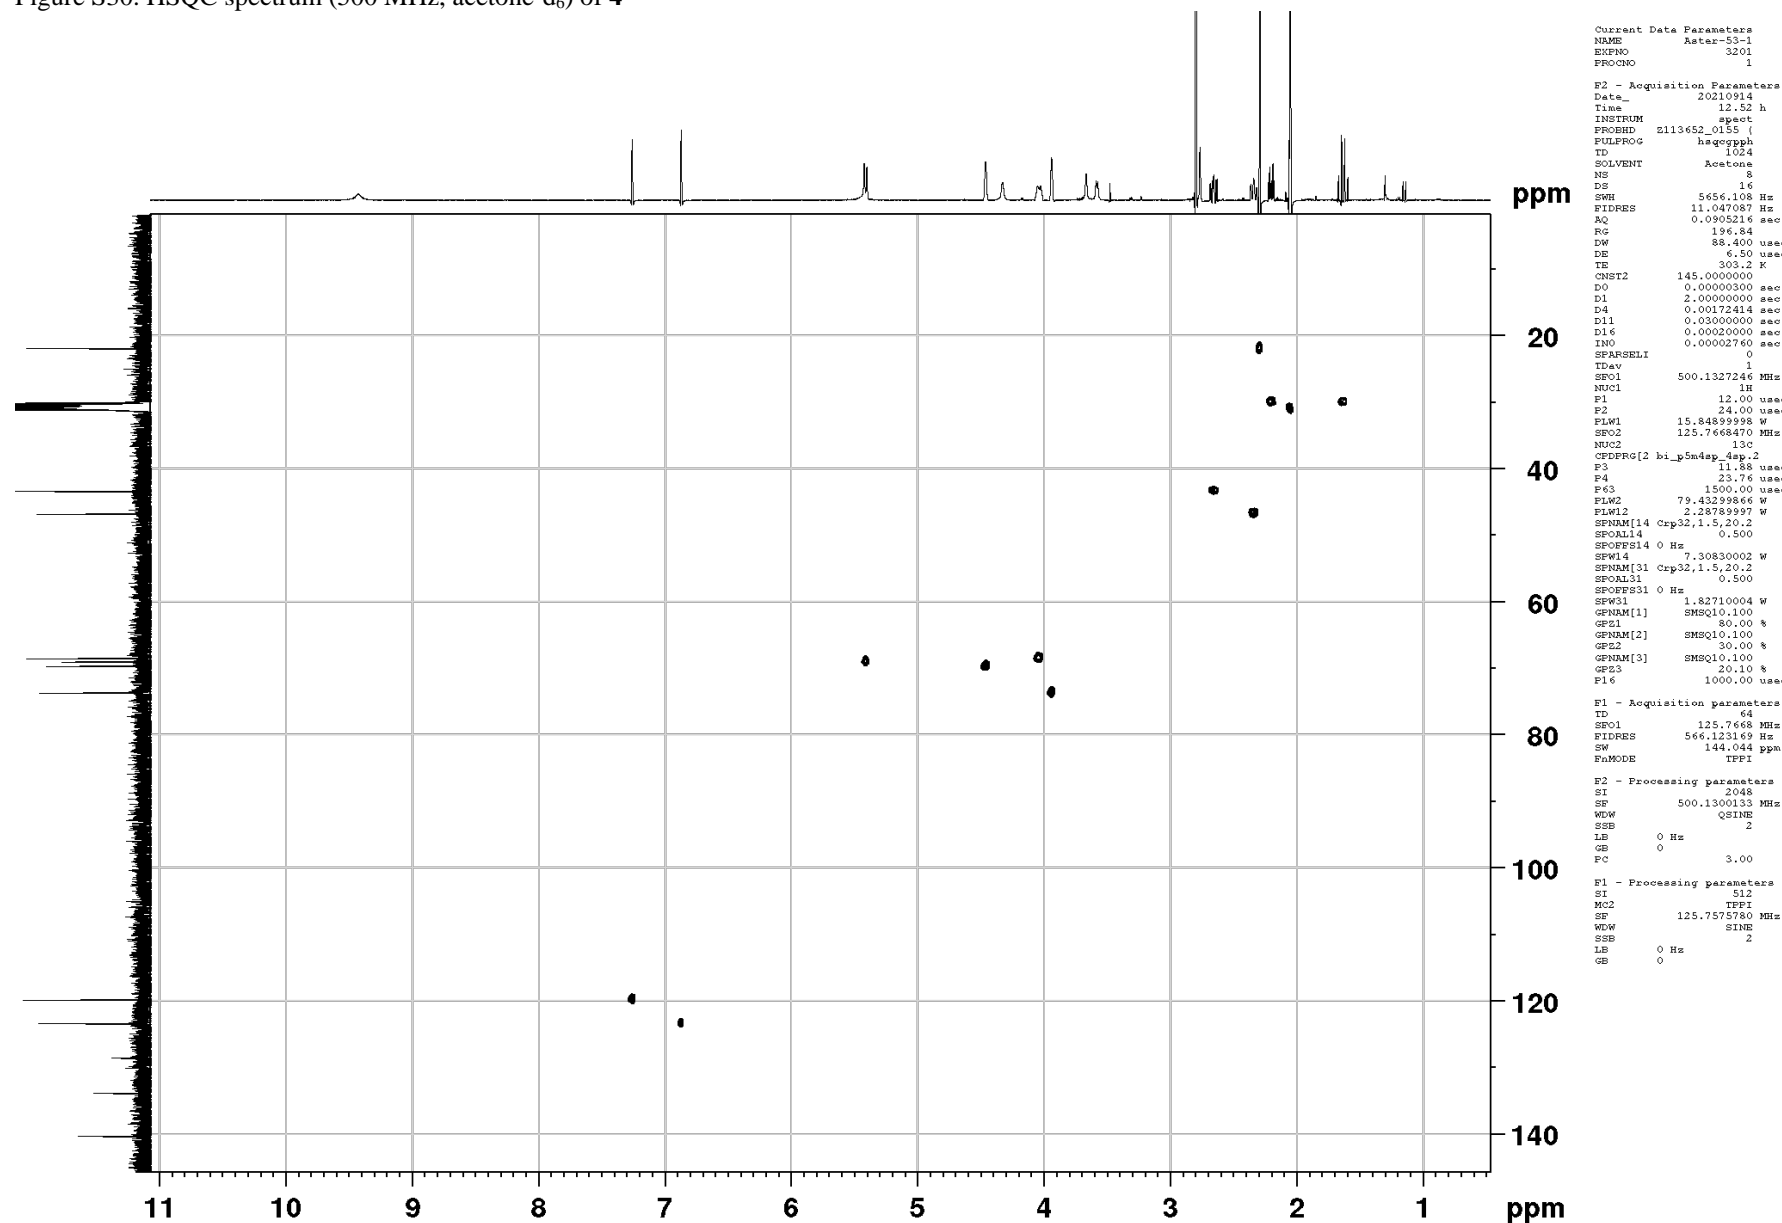



Figure S31. HMBC spectrum (500 MHz, acetone-d<sub>6</sub>) of **4**

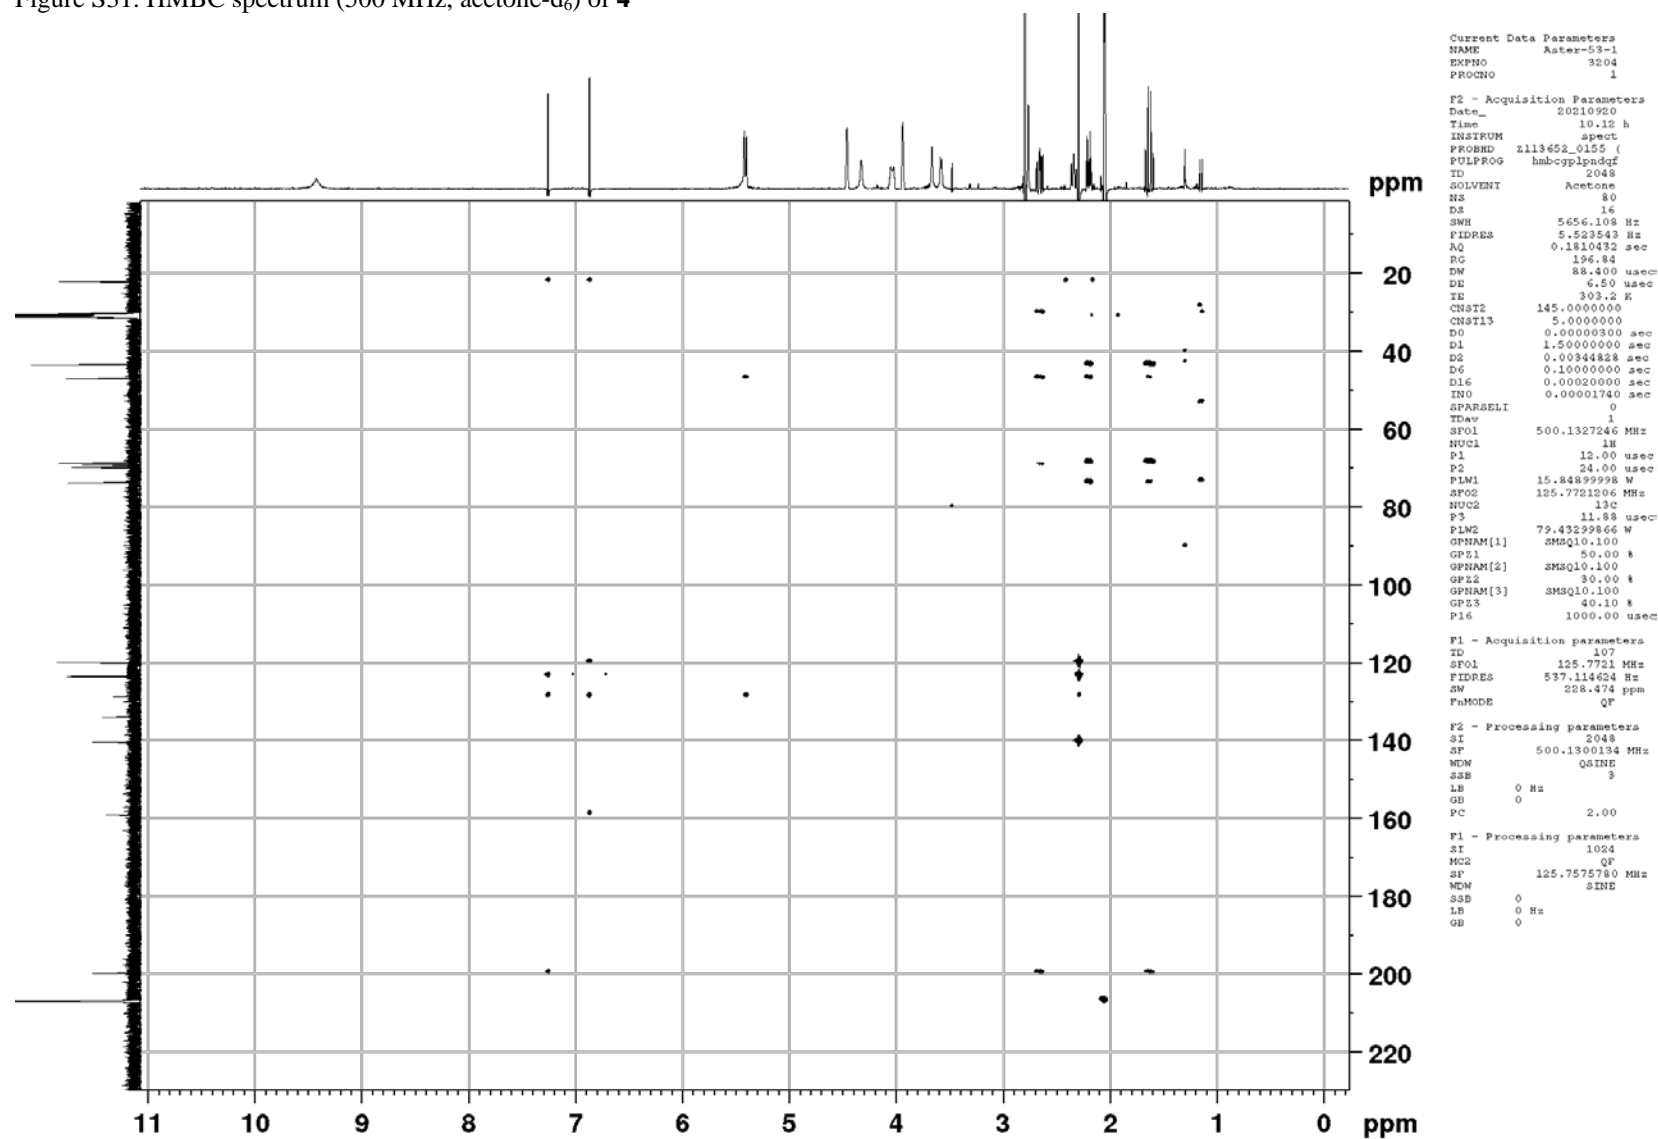

Figure S32. ROESY spectrum (500 MHz, acetone-d<sub>6</sub>) of **4**

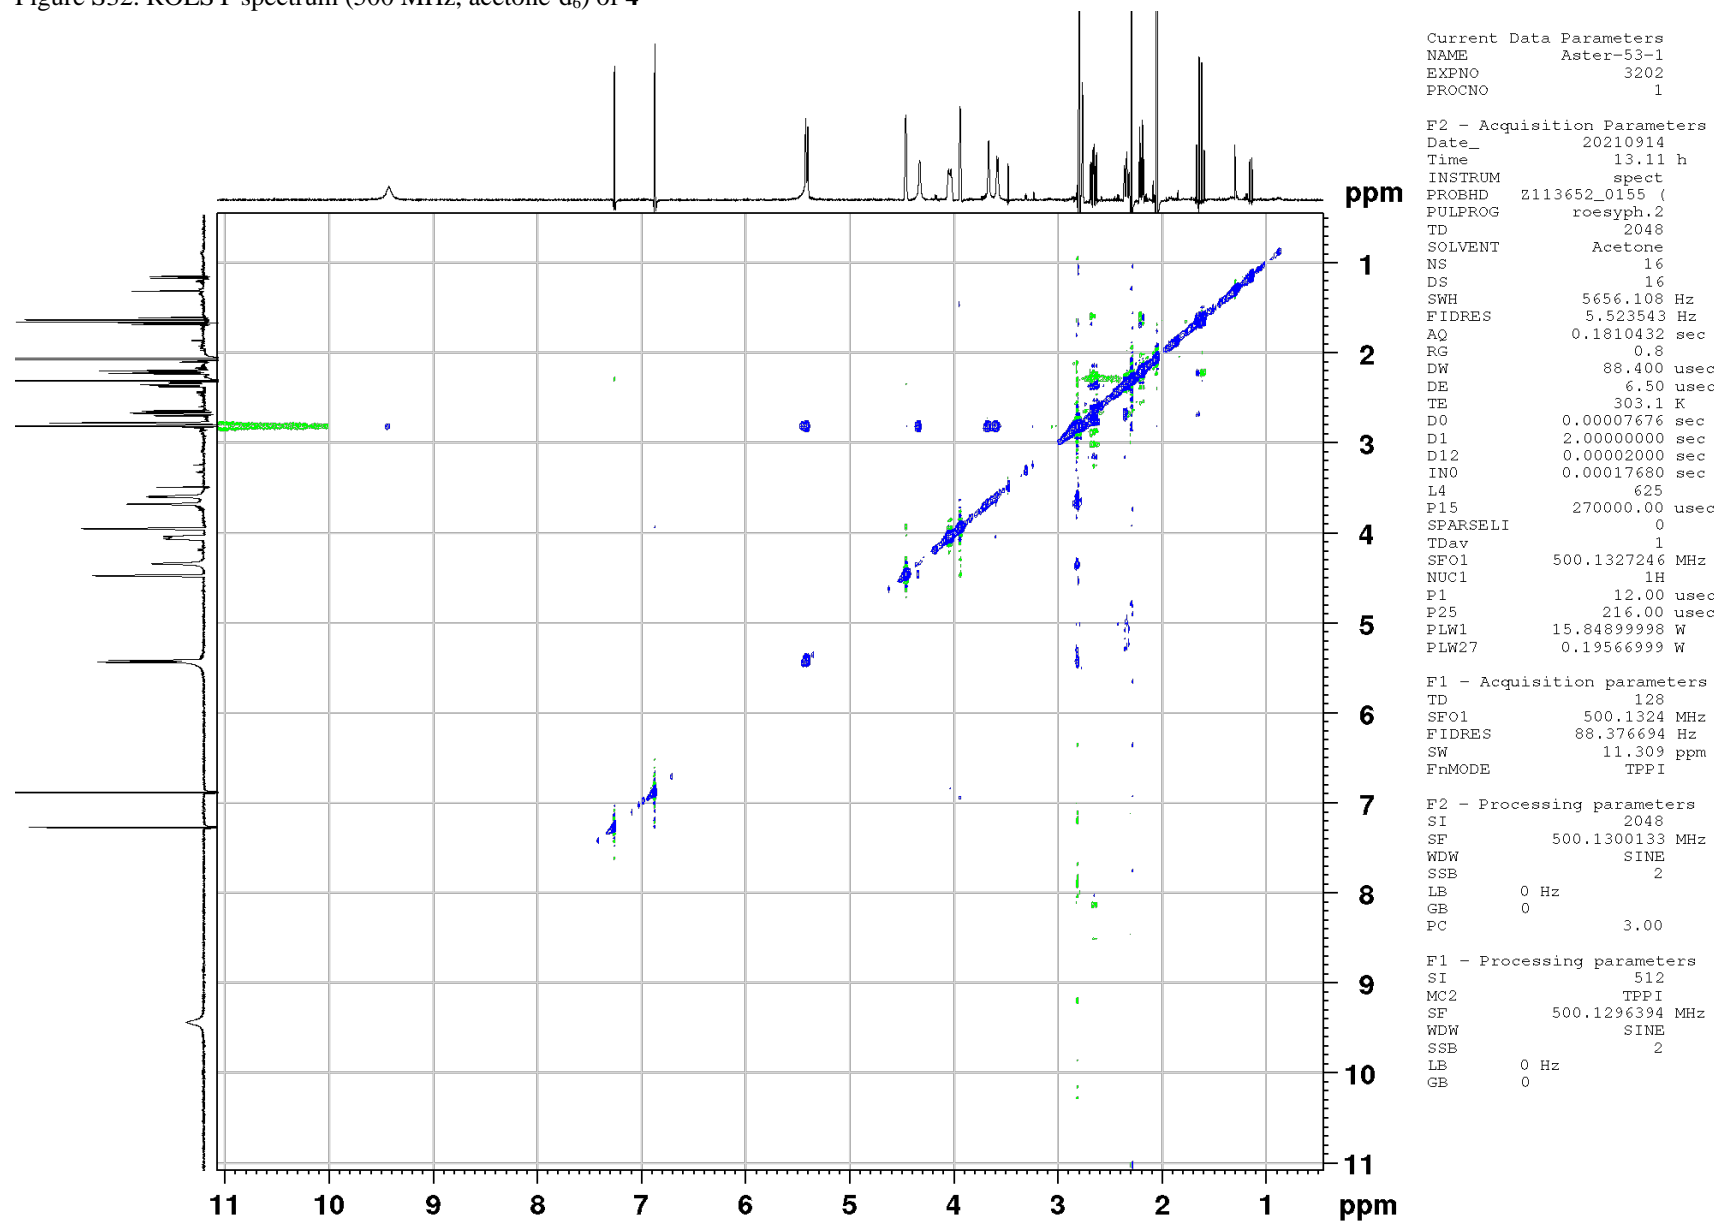

Figure S33.  $^1\text{H}$  NMR spectrum (500 MHz,  $\text{CDCl}_3$ ) of **5**

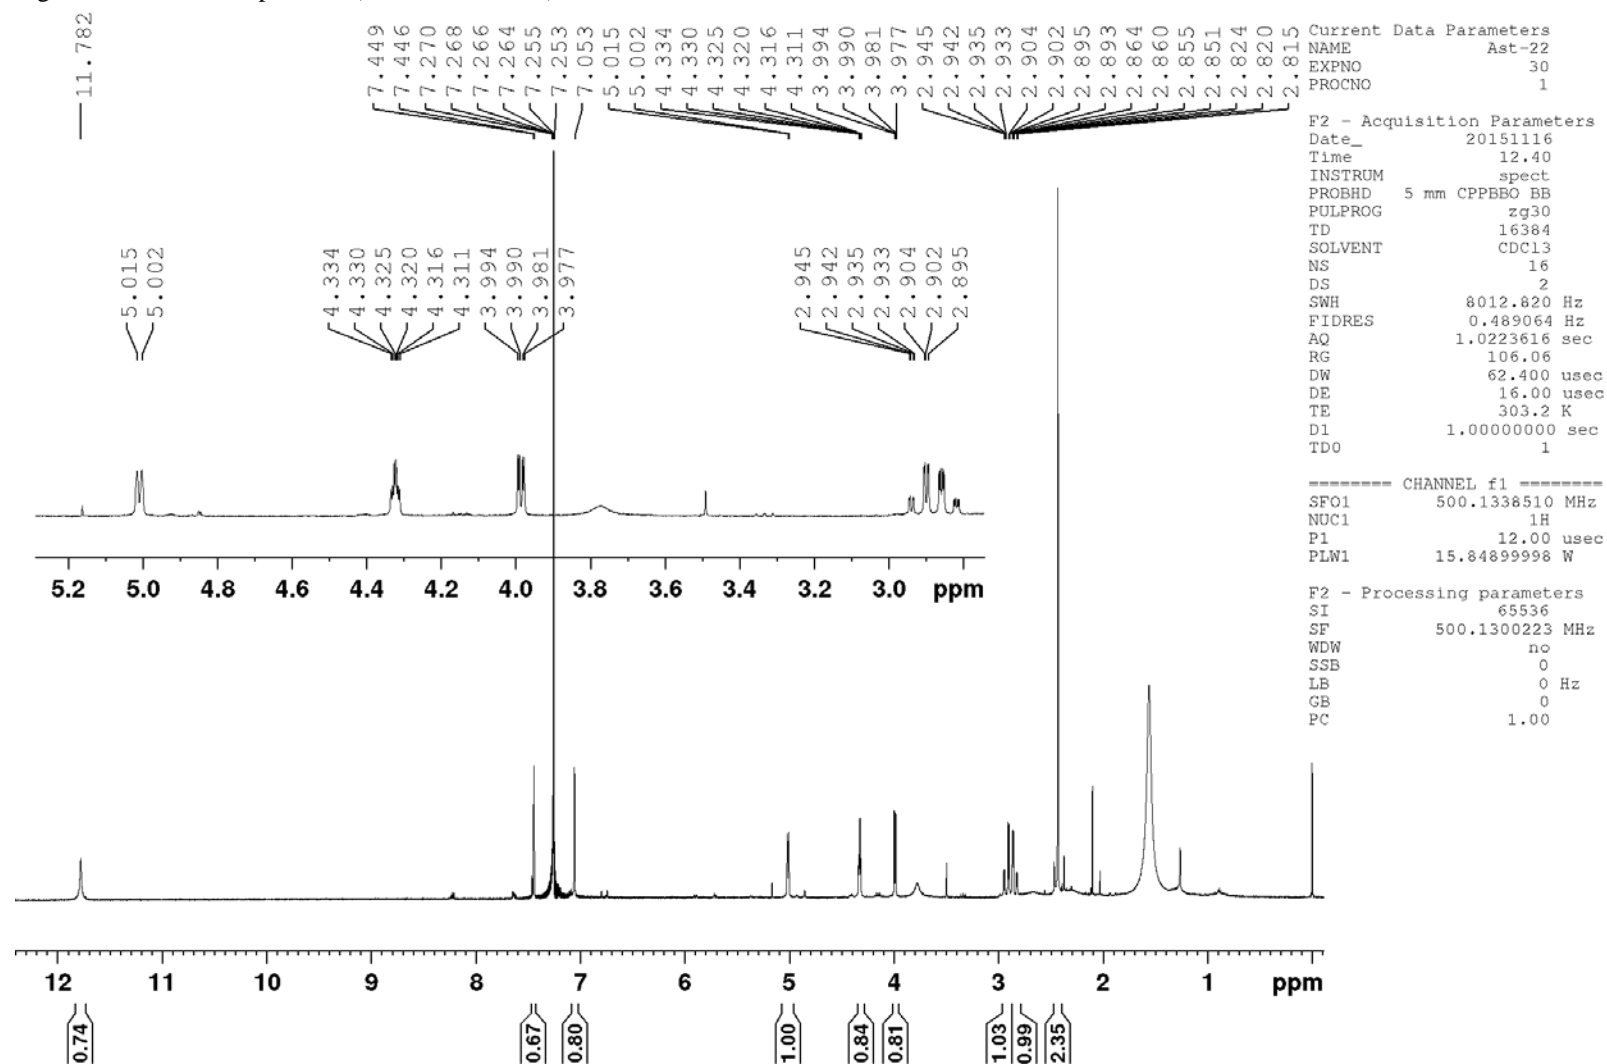

Figure S34.  $^{13}\text{C}$  NMR spectrum (125.77 MHz,  $\text{CDCl}_3$ ) of **5**

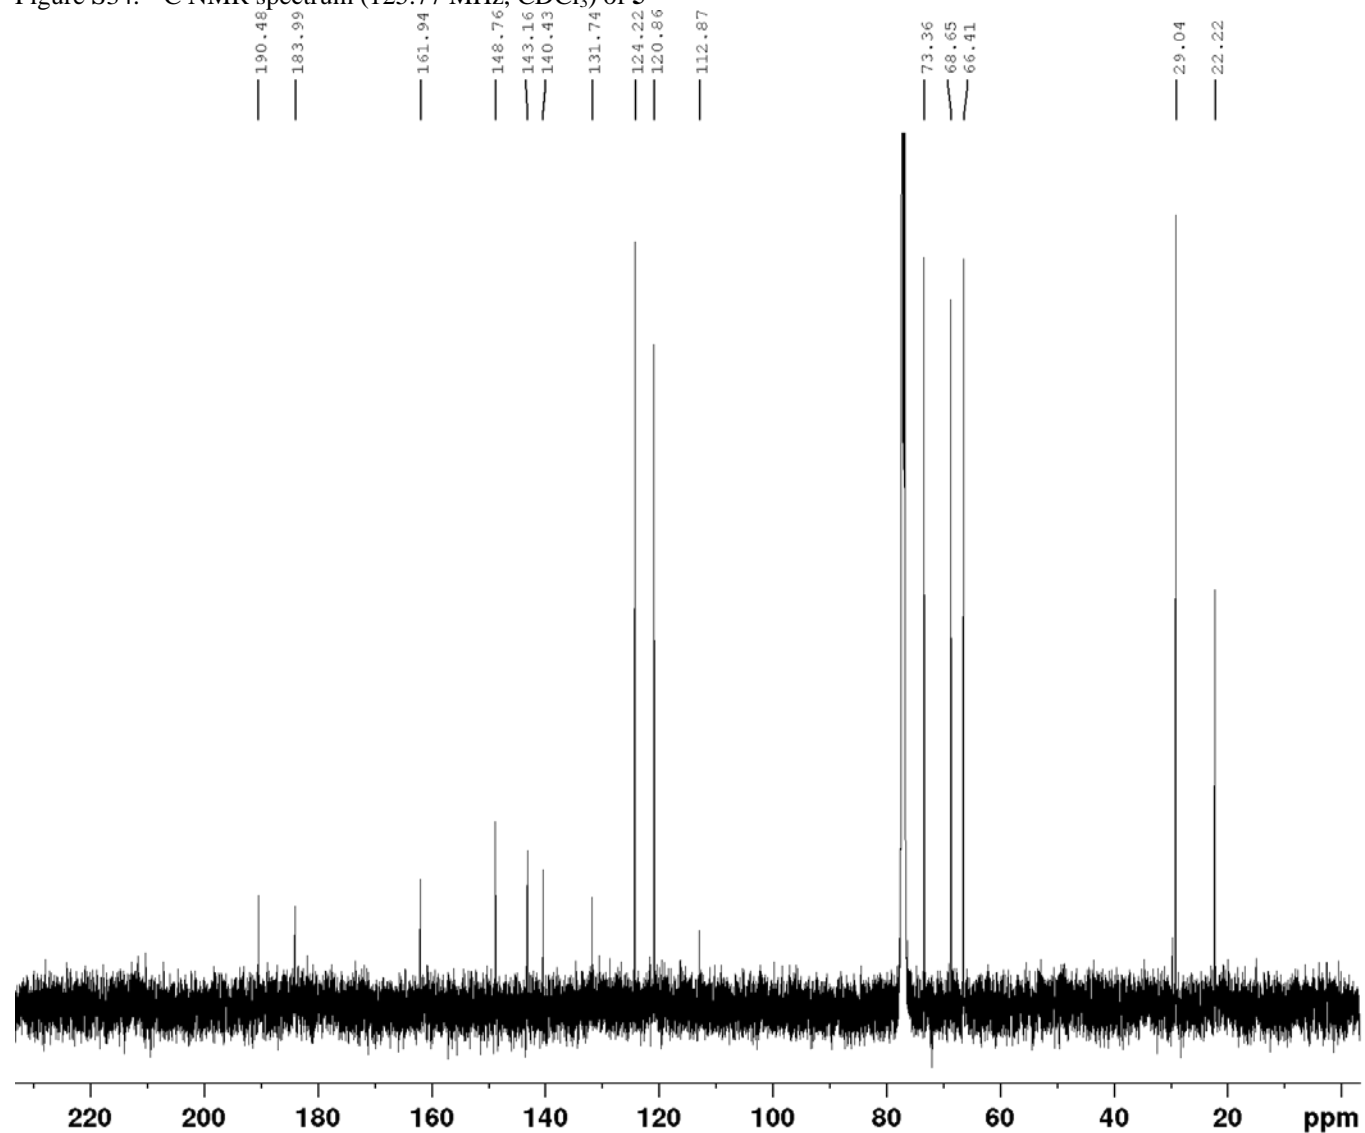

```

Current Data Parameters
NAME           Ast-22
EXPNO          3530
PROCNO         1

F2 - Acquisition Parameters
Date_          20151116
Time           12.43
INSTRUM        spect
PROBHD         5 mm CPPBBO BB
PULPROG        zgpg
TD             65536
SOLVENT        CDCl3
NS             2947
DS             2
SWH            29761.904 Hz
FIDRES         0.454131 Hz
AQ            1.1010048 sec
RG            196.84
DW            16.800 usec
DE            32.00 usec
TE            303.2 K
D1            2.00000000 sec
D11           0.03000000 sec
TD0           4096

===== CHANNEL f1 =====
SFO1          125.7722511 MHz
NUC1           13C
P1            10.00 usec
PLW1          74.13099670 W

===== CHANNEL f2 =====
SFO2          500.1325007 MHz
NUC2           1H
CPDPRG[2]     waltz16
PCPD2         78.40 usec
PLW2          15.84899998 W
PLW12         0.31623000 W
PLW13         0.15849000 W

F2 - Processing parameters
SI            65536
SF           125.7577920 MHz
WDW           EM
SSB           0
LB            1.00 Hz
GB            0
PC            1.40
    
```

Figure S35. DEPT-135 spectrum (125.77 MHz, CDCl<sub>3</sub>) of **5**

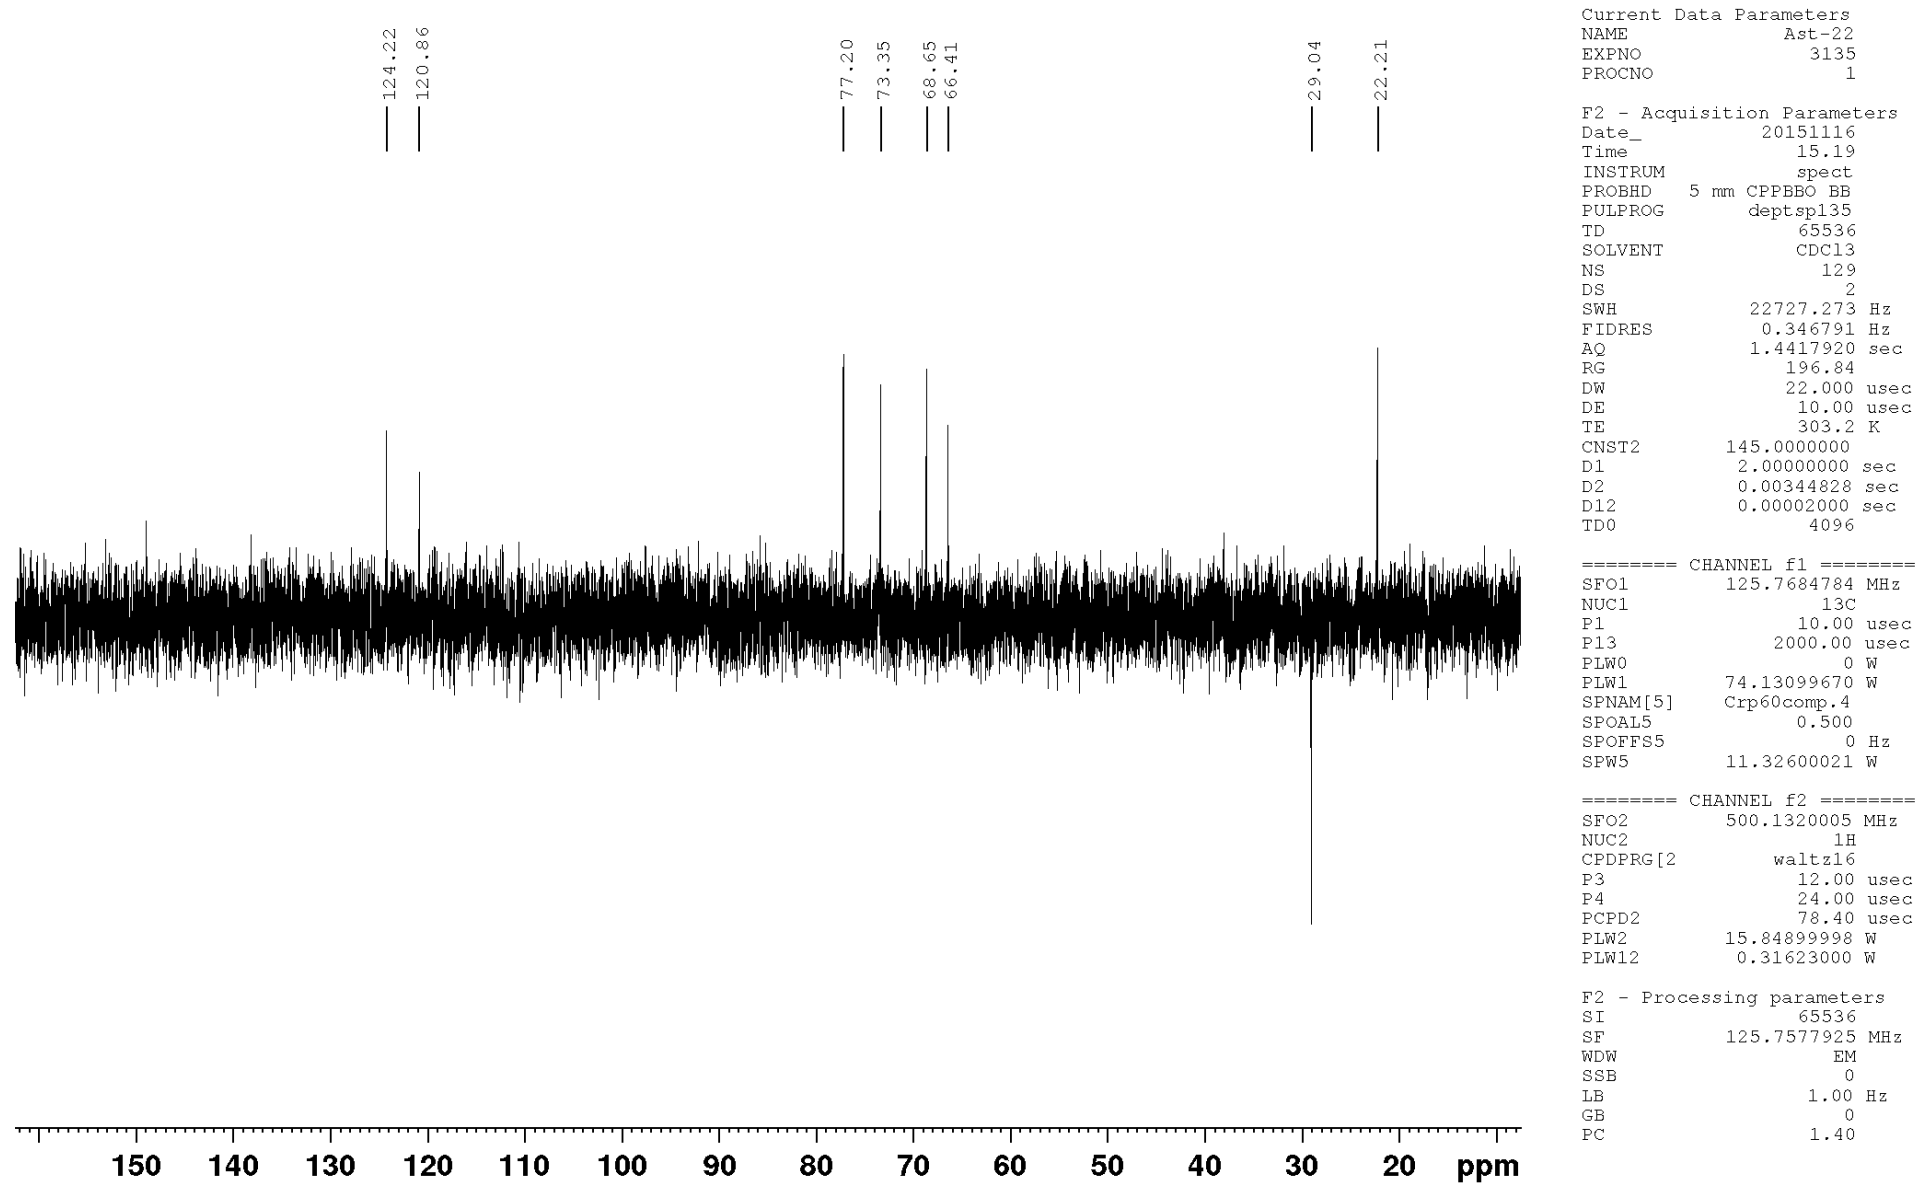

Figure S36. <sup>1</sup>H NMR spectrum (700 MHz, acetone-d<sub>6</sub>) of **6**

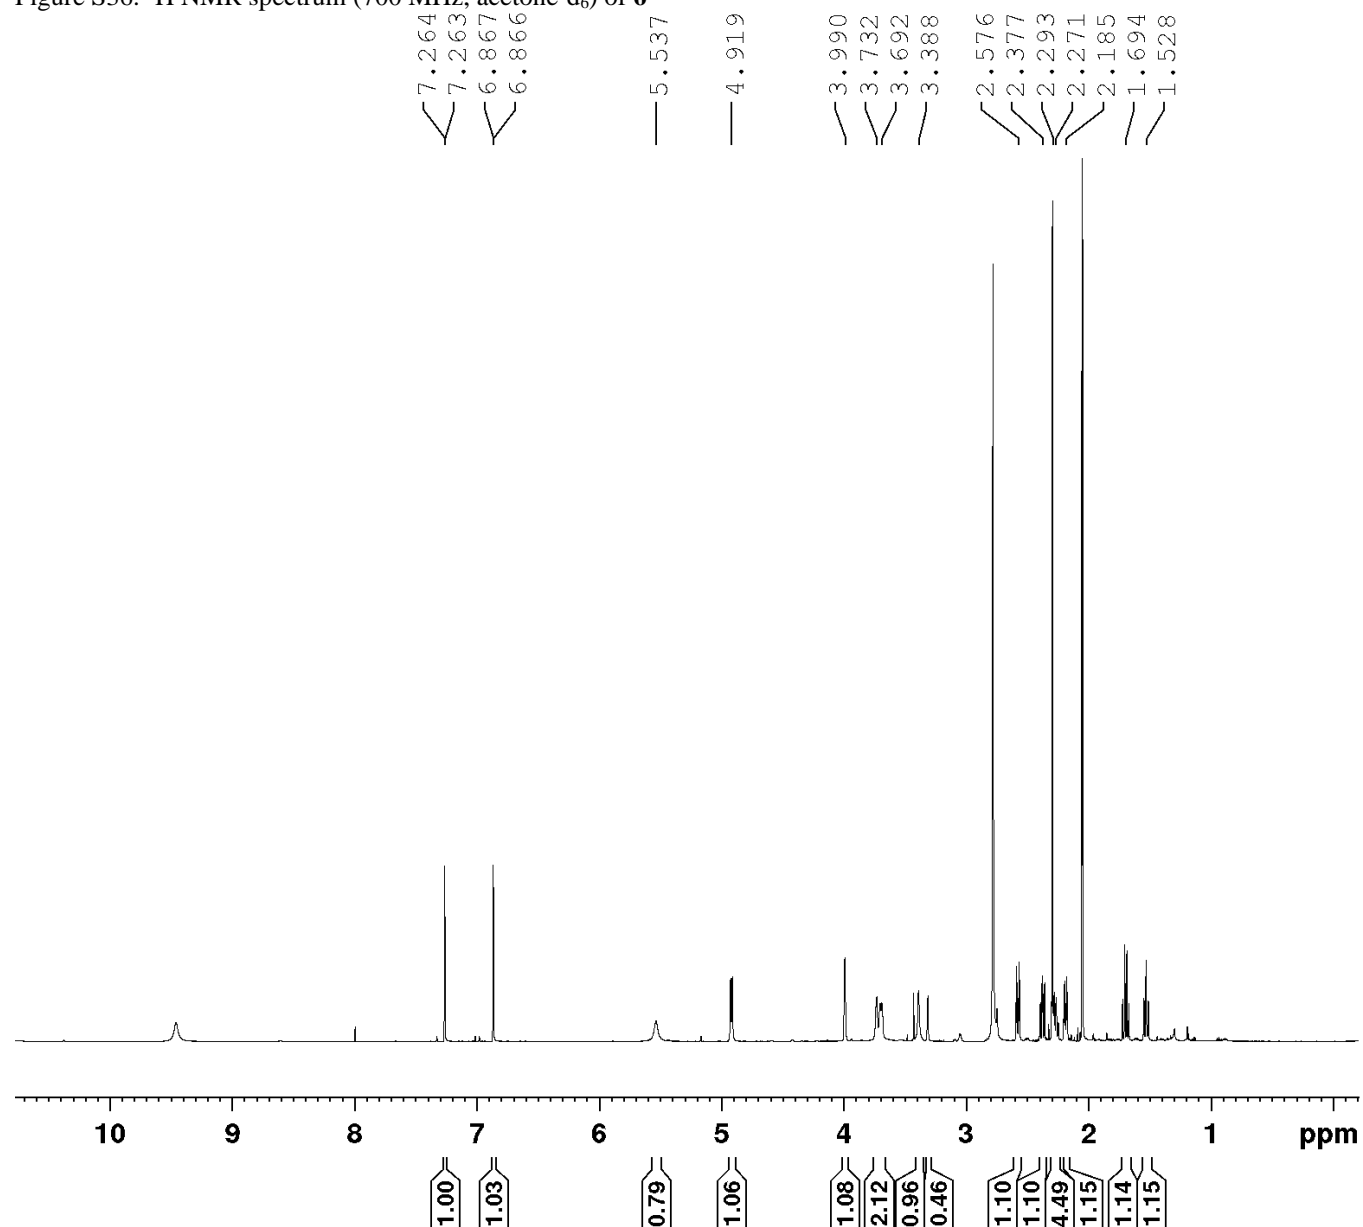

Current Data Parameters  
NAME Aster-44a  
EXPNO 33  
PROCNO 1

F2 - Acquisition Parameters  
Date\_ 20210813  
Time 17.23 h  
INSTRUM spect  
PROBHD Z180728\_0001 (  
PULPROG zg30  
TD 65536  
SOLVENT Acetone  
NS 34  
DS 4  
SWH 7692.308 Hz  
FIDRES 0.234751 Hz  
AQ 4.2598400 sec  
RG 165.68  
DW 65.000 usec  
DE 6.50 usec  
TE 306.0 K  
D1 0 sec  
TD0 1  
SFO1 700.0037100 MHz  
NUC1 1H  
P0 2.67 usec  
P1 8.00 usec  
PLW1 18.54100037 W

F2 - Processing parameters  
SI 65536  
SF 700.0000120 MHz  
WDW EM  
SSB 0  
LB 0.10 Hz  
GB 0  
PC 4.00

Figure S37.  $^{13}\text{C}$  NMR spectrum (125.77 MHz, acetone- $\text{d}_6$ ) of **6**

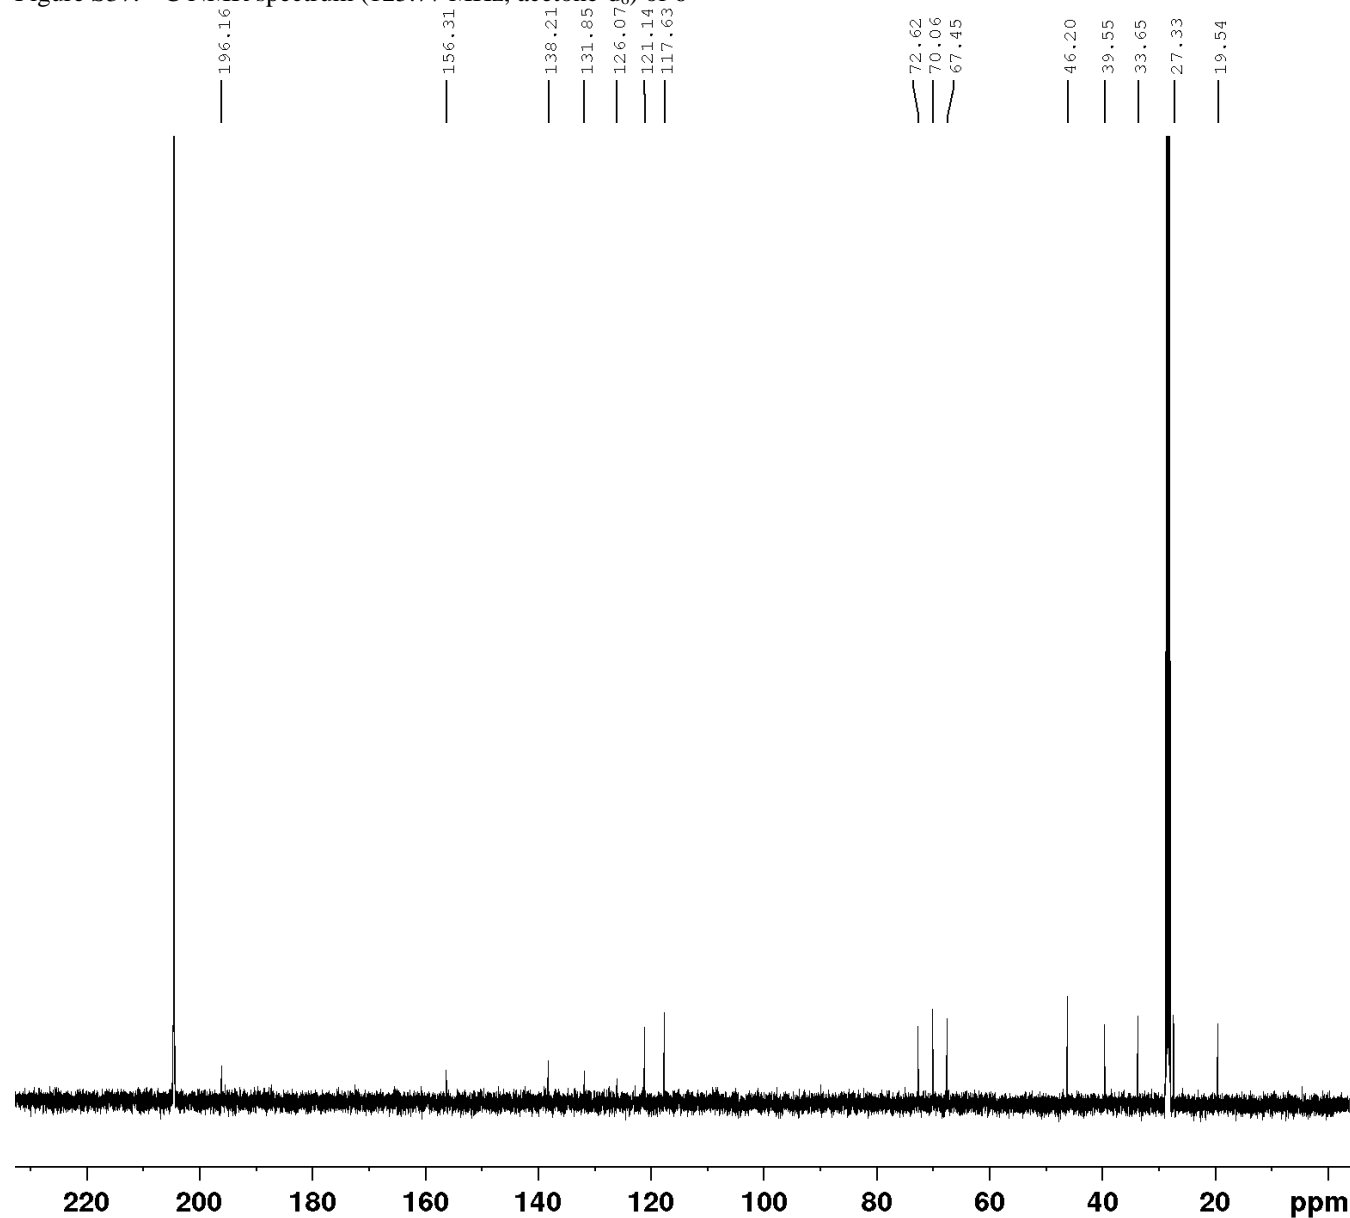

Current Data Parameters  
NAME Aster-44a  
EXPNO 3535  
PROCNO 1

F2 - Acquisition Parameters  
Date\_ 20210817  
Time 15.53 h  
INSTRUM spect  
PROBHD Z113652\_0155 (   
PULPROG zgpg30  
TD 32768  
SOLVENT Acetone  
NS 256  
DS 2  
SWH 29761.904 Hz  
FIDRES 1.816522 Hz  
AQ 0.5505024 sec  
RG 196.84  
DW 16.800 usec  
DE 6.50 usec  
TE 308.2 K  
D1 2.00000000 sec  
D11 0.03000000 sec  
TD0 512  
SFO1 125.7722511 MHz  
NUC1  $^{13}\text{C}$   
P0 3.96 usec  
P1 11.88 usec  
PLW1 79.43299866 W  
SFO2 500.1325007 MHz  
NUC2  $^1\text{H}$   
CPDPRG[2] waltz16  
PCPD2 80.00 usec  
PLW2 15.84899998 W  
PLW12 0.33610001 W  
PLW13 0.16906001 W

F2 - Processing parameters  
SI 65536  
SF 125.7578616 MHz  
WDW EM  
SSB 0  
LB 1.00 Hz  
GB 0  
PC 1.50

Figure S38. DEPT-135 spectrum (125.77 MHz, acetone-d<sub>6</sub>) of **6**

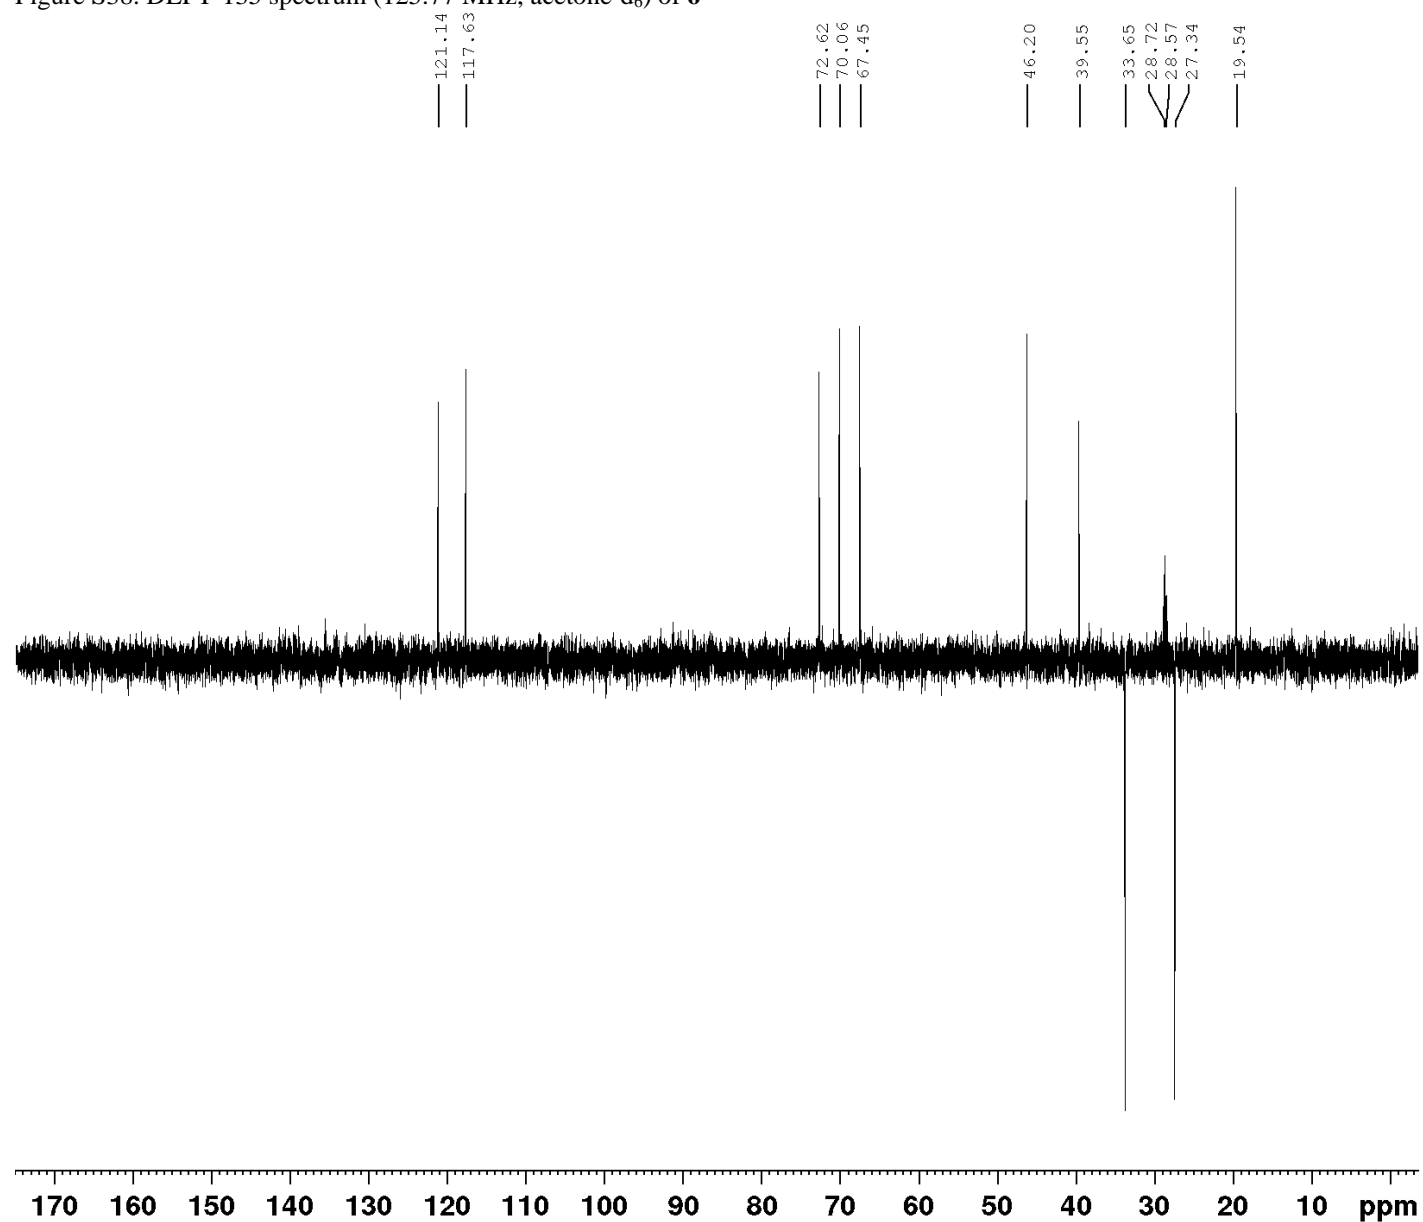

Current Data Parameters  
NAME Aster-44a  
EXPNO 3135  
PROCNO 1

F2 - Acquisition Parameters  
Date\_ 20210817  
Time 15.41 h  
INSTRUM spect  
PROBHD Z113652\_0155 (  
PULPROG deptsp135  
TD 65536  
SOLVENT Acetone  
NS 234  
DS 2  
SWH 22727.273 Hz  
FIDRES 0.693581 Hz  
AQ 1.4417920 sec  
RG 196.84  
DW 22.000 usec  
DE 6.50 usec  
TE 308.1 K  
CNST2 145.0000000  
D1 2.00000000 sec  
D2 0.00344828 sec  
D12 0.00002000 sec  
TD0 64  
SFO1 125.7684784 MHz  
NUC1 13C  
P1 11.88 usec  
P13 2000.00 usec  
PLW0 0 W  
PLW1 79.43299866 W  
SPNAM[5] Crp60comp.4  
SPOAL5 0.500  
SPOFFS5 0 Hz  
SPW5 17.12899971 W  
SFO2 500.1320005 MHz  
NUC2 1H  
CPDPRG[2] waltz16  
P3 12.00 usec  
P4 24.00 usec  
PCPD2 80.00 usec  
PLW2 15.84899998 W  
PLW12 0.33610001 W

F2 - Processing parameters  
SI 65536  
SF 125.7578616 MHz  
WDW EM  
SSB 0  
LB 1.00 Hz  
GB 0  
PC 2.00



Figure S39. COSY-45 spectrum (700 MHz, acetone-d<sub>6</sub>) of **6**

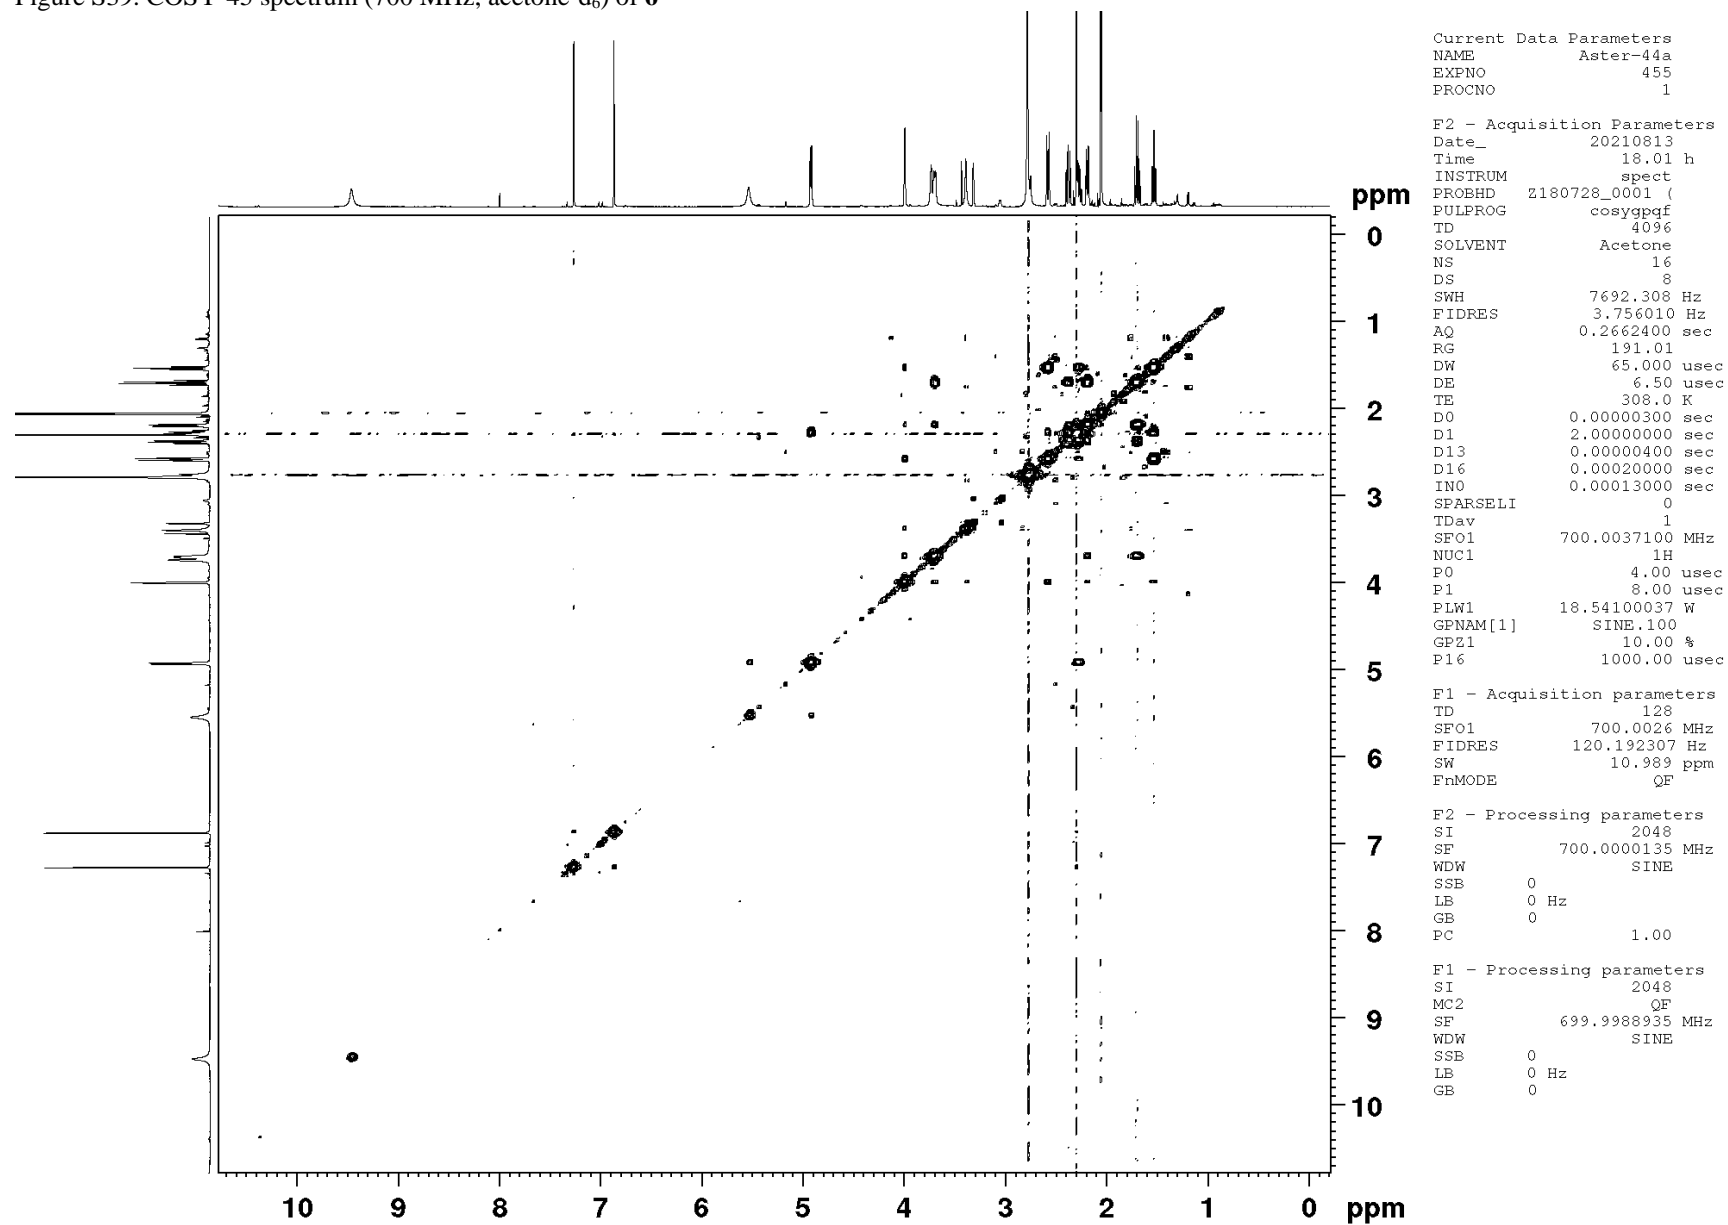

Figure S40. HSQC spectrum (700 MHz, acetone-d<sub>6</sub>) of **6**

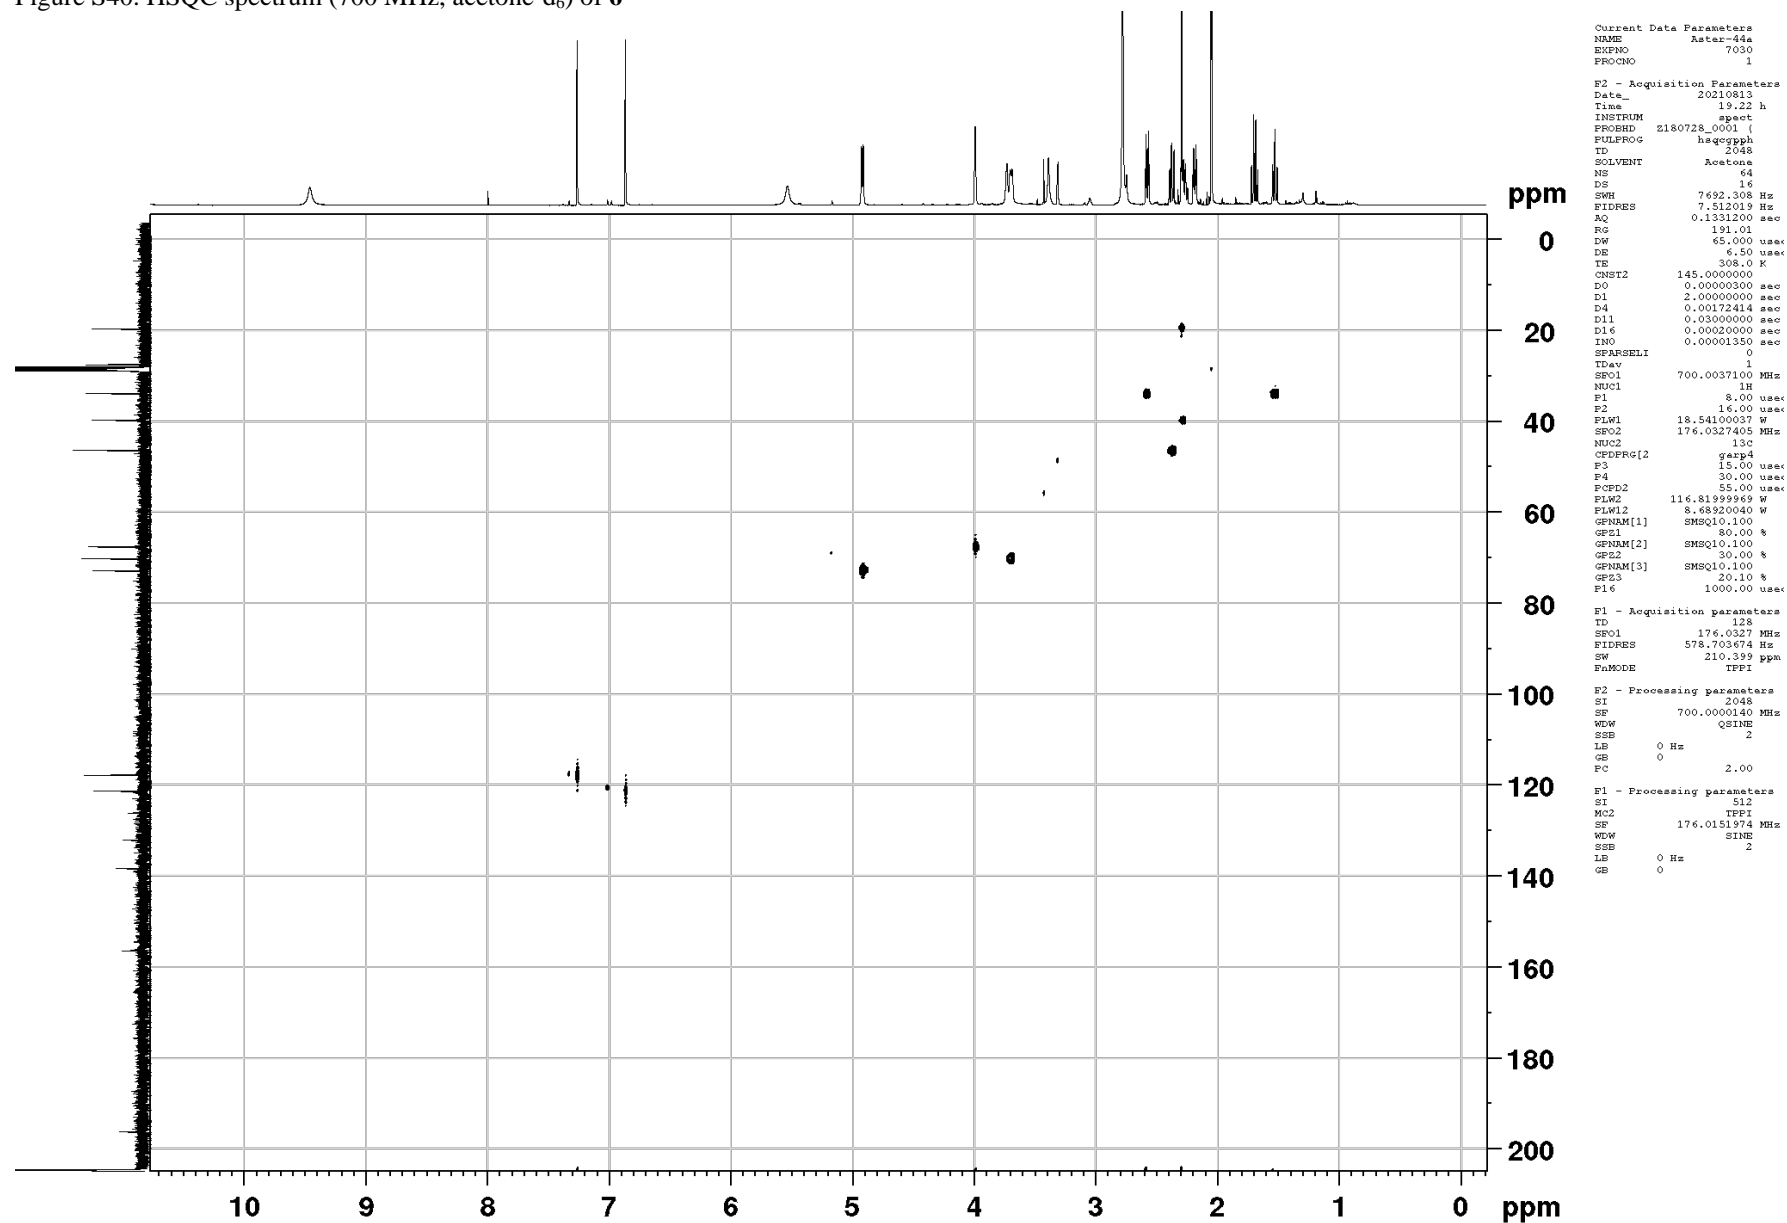

Figure S41. HMBC spectrum (700 MHz, acetone-d<sub>6</sub>) of **6**

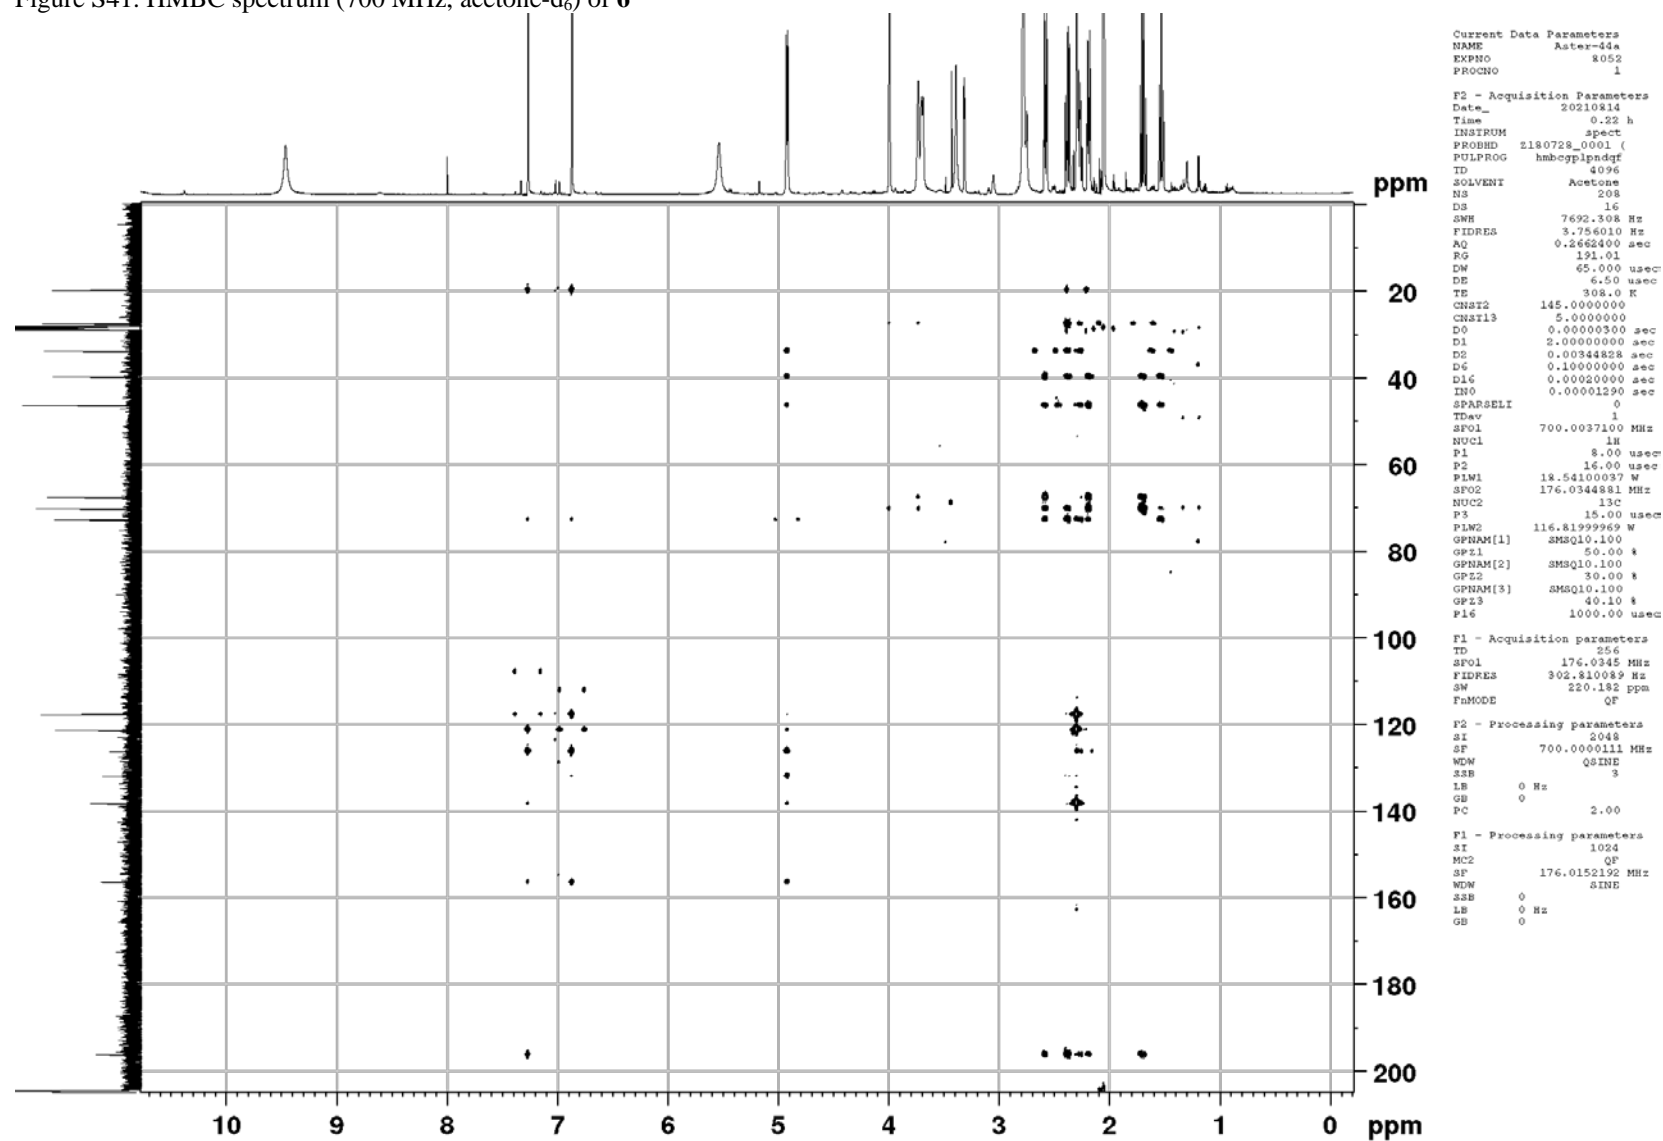

Figure S42. ROESY spectrum (500 MHz, acetone-d<sub>6</sub>) of **6**

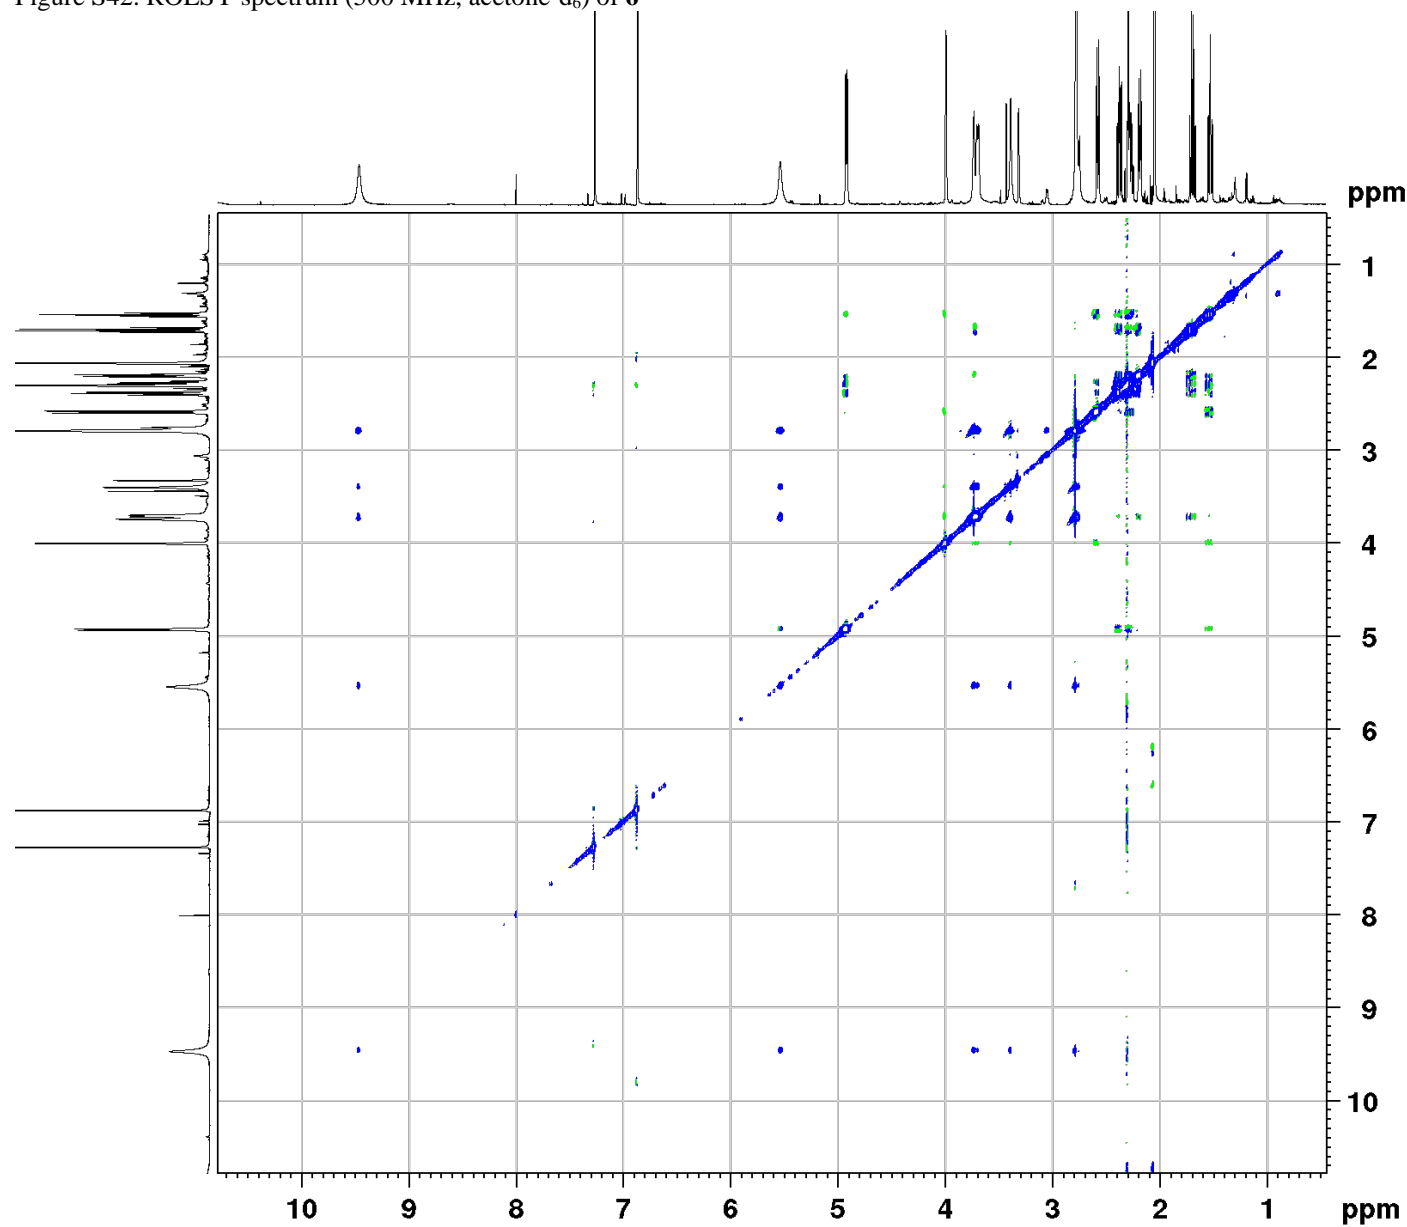

```

Current Data Parameters
NAME          Aster-44a
EXPNO         6130
PROCNO        1

F2 - Acquisition Parameters
Date_         20210817
Time          20.46 h
INSTRUM       spect
PROBHD        Z113652_0155 (
PULPROG       roesyph.2
TD            4096
SOLVENT       Acetone
NS            40
DS            16
SWH           5498.534 Hz
FIDRES        2.684831 Hz
AQ            0.3724629 sec
RG            4.19
DW            90.933 usec
DE            6.50 usec
TE            308.2 K
D0            0.00007926 sec
D1            2.00000000 sec
D12           0.00002000 sec
IN0           0.00018180 sec
L4            625
P15           270000.00 usec
TDav          1
SF01          500.1326507 MHz
NUC1           1H
P1            12.00 usec
P25           216.00 usec
PLW1          15.84899998 W
PLW27         0.19566999 W

F1 - Acquisition parameters
TD            512
SF01          500.1327 MHz
FIDRES        21.486525 Hz
SW            10.998 ppm
FnMODE        TPPI

F2 - Processing parameters
SI            2048
SF            500.1300083 MHz
WDW           SINE
SSB           2
LB            0 Hz
GB            0
PC            2.00

F1 - Processing parameters
SI            512
MC2           TPPI
SF            500.1300095 MHz
WDW           SINE
SSB           2
LB            0 Hz
GB            0
  
```

Figure S43. <sup>1</sup>H NMR spectrum (700 MHz, acetone-d<sub>6</sub>) of 7

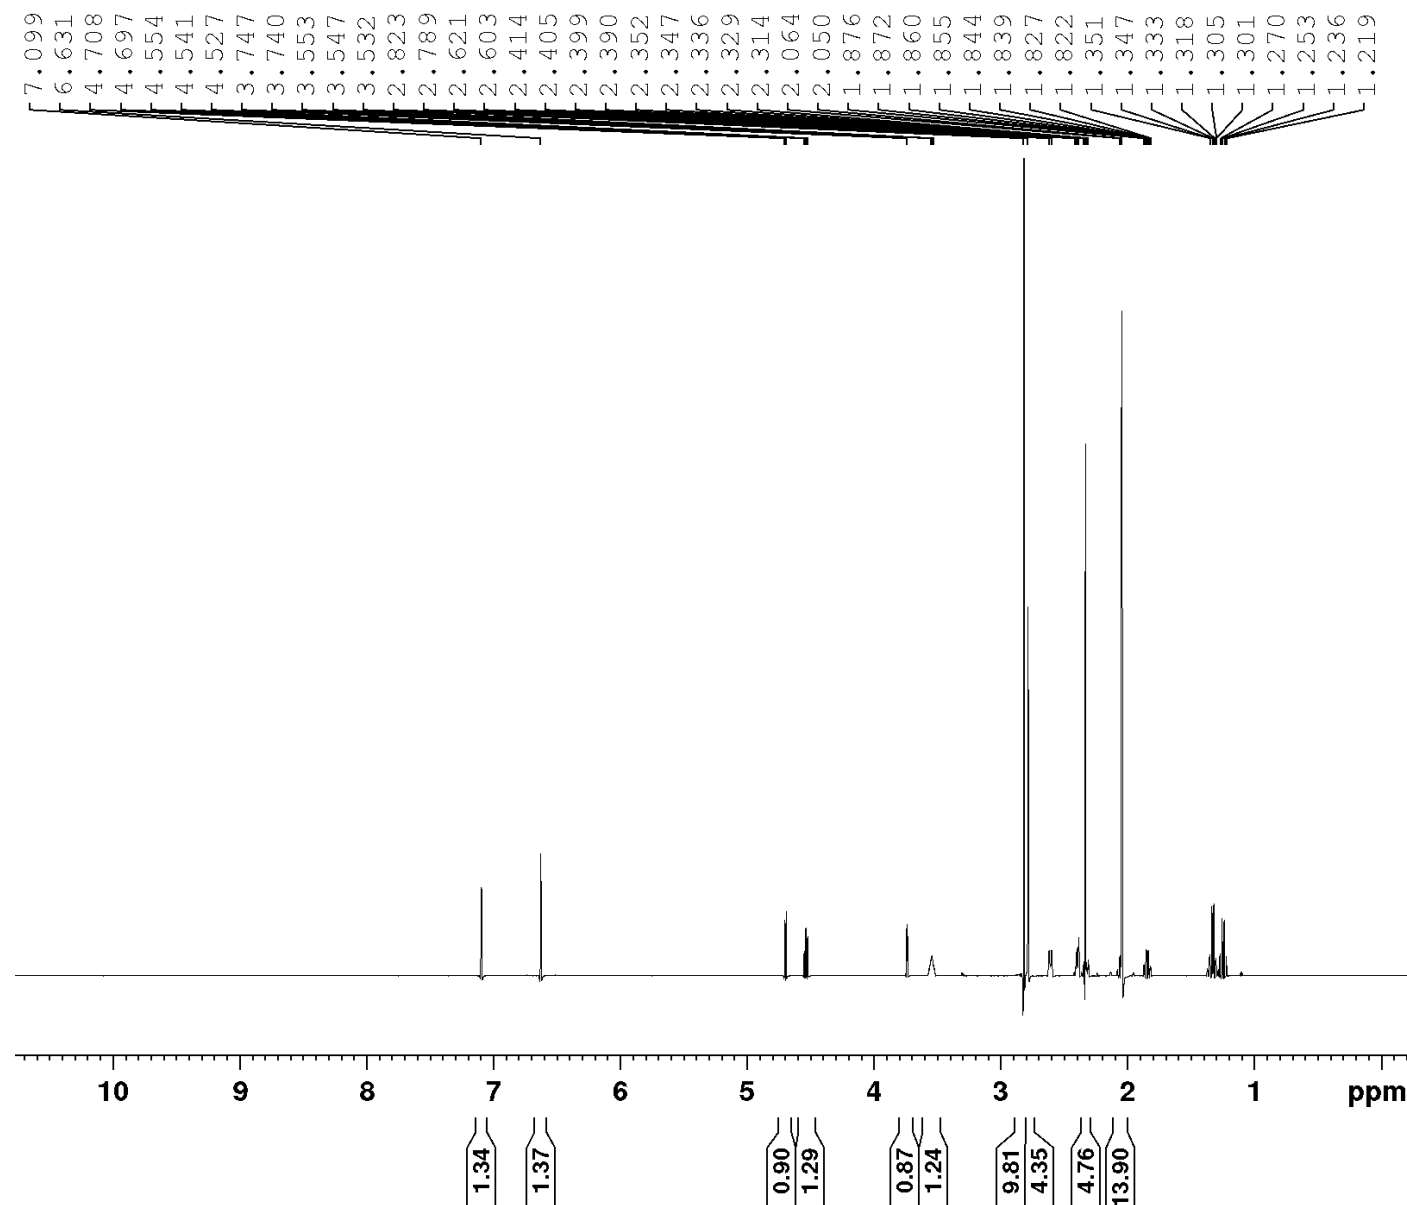

Current Data Parameters  
NAME Aster-41a  
EXPNO 1  
PROCNO 1

F2 - Acquisition Parameters  
Date\_ 20210501  
Time 10.58 h  
INSTRUM spect  
PROBHD Z112726\_0001 (  
PULPROG zg  
TD 32768  
SOLVENT Acetone  
NS 1  
DS 0  
SWH 11160.714 Hz  
FIDRES 0.681196 Hz  
AQ 1.4680064 sec  
RG 181  
DW 44.800 usec  
DE 6.50 usec  
TE 303.0 K  
D1 0 sec  
TD0 1  
SFO1 700.0053900 MHz  
NUC1 1H  
P1 12.60 usec  
PLW1 39.81100082 W

F2 - Processing parameters  
SI 32768  
SF 700.0000117 MHz  
WDW GM  
SSB 0  
LB -2.50 Hz  
GB 0.08  
PC 4.00

Figure S44.  $^{13}\text{C}$  NMR spectrum (176.04 MHz, acetone- $\text{d}_6$ ) of **7**

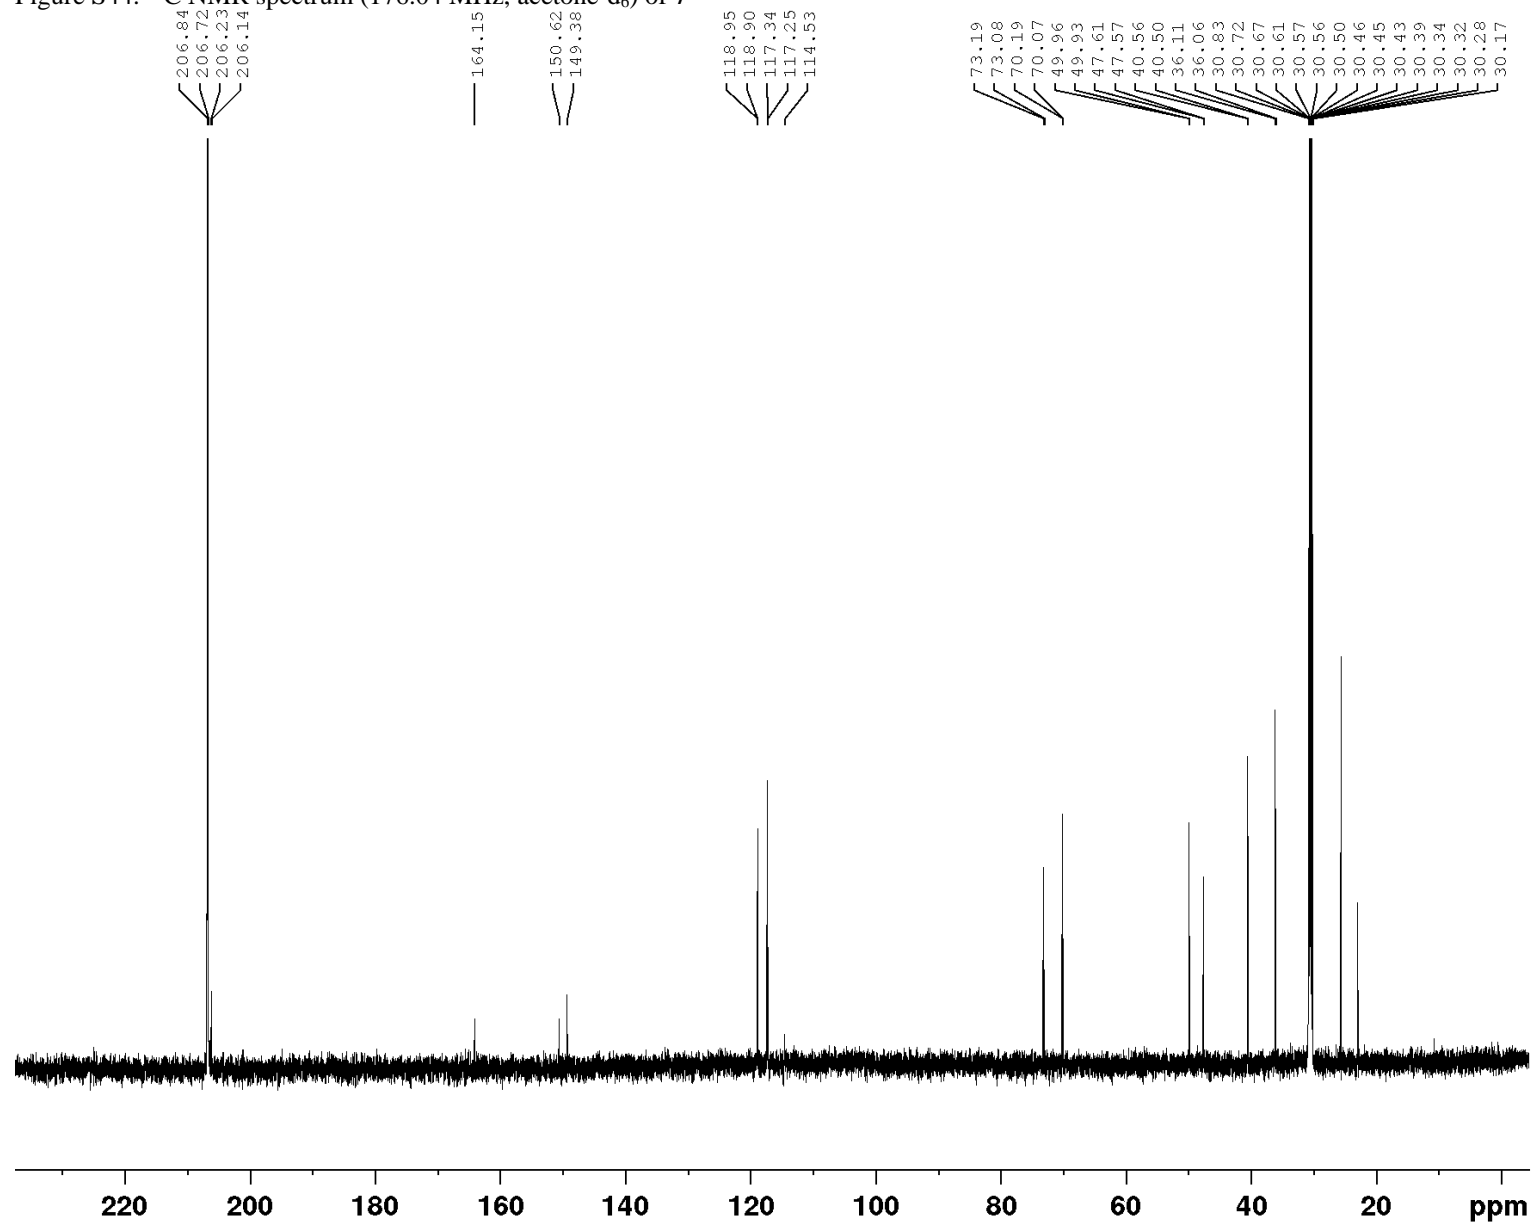

```

Current Data Parameters
NAME          Aster-41a
EXPNO         11
PROCNO        1

F2 - Acquisition Parameters
Date_         20210501
Time          11.33 h
INSTRUM       spect
PROBHD        z112726_0001 (
PULPROG       zgpg
TD            32768
SOLVENT       Acetone
NS            677
DS            2
SWH           42613.637 Hz
FIDRES        2.600930 Hz
AQ            0.3844779 sec
RG            203
DW            11.733 usec
DE            6.50 usec
TE            303.5 K
D1            2.00000000 sec
D11           0.03000000 sec
TD0           128
SFO1          176.0353807 MHz
NUC1          13C
P1            10.50 usec
PLW1          35.48099899 W
SFO2          700.0035000 MHz
NUC2          1H
CPDPRG[2]    waltz16
PCPD2         70.00 usec
PLW2          39.81100082 W
PLW12         1.43719995 W
PLW13         0.83929998 W

F2 - Processing parameters
SI            65536
SF            176.0148619 MHz
WDW           EM
SSB           0
LB            1.50 Hz
GB            0
PC            1.30
    
```

Figure S45. DEPT-135 spectrum (176.04 MHz, acetone-d<sub>6</sub>) of **7**

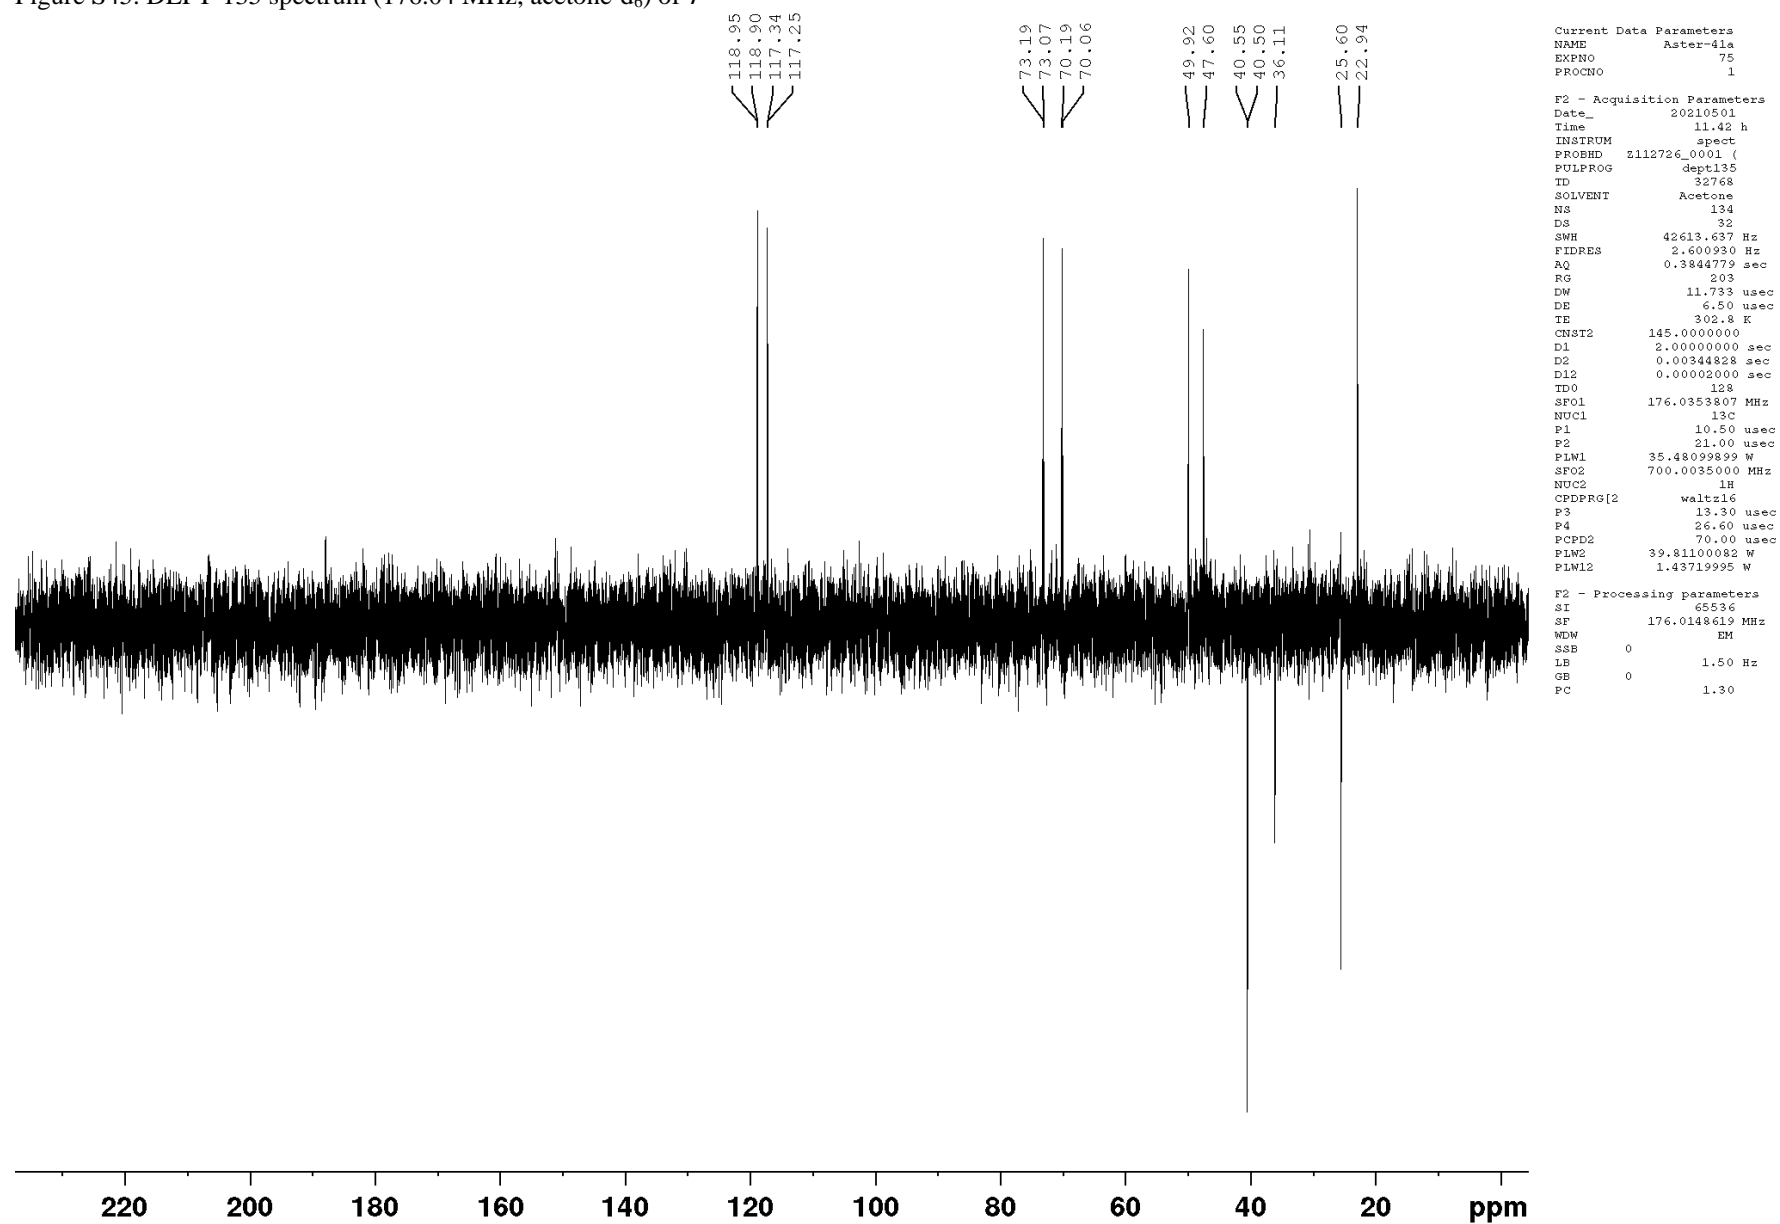

Figure S46. COSY-45 spectrum (700 MHz, acetone-d<sub>6</sub>) of **7**

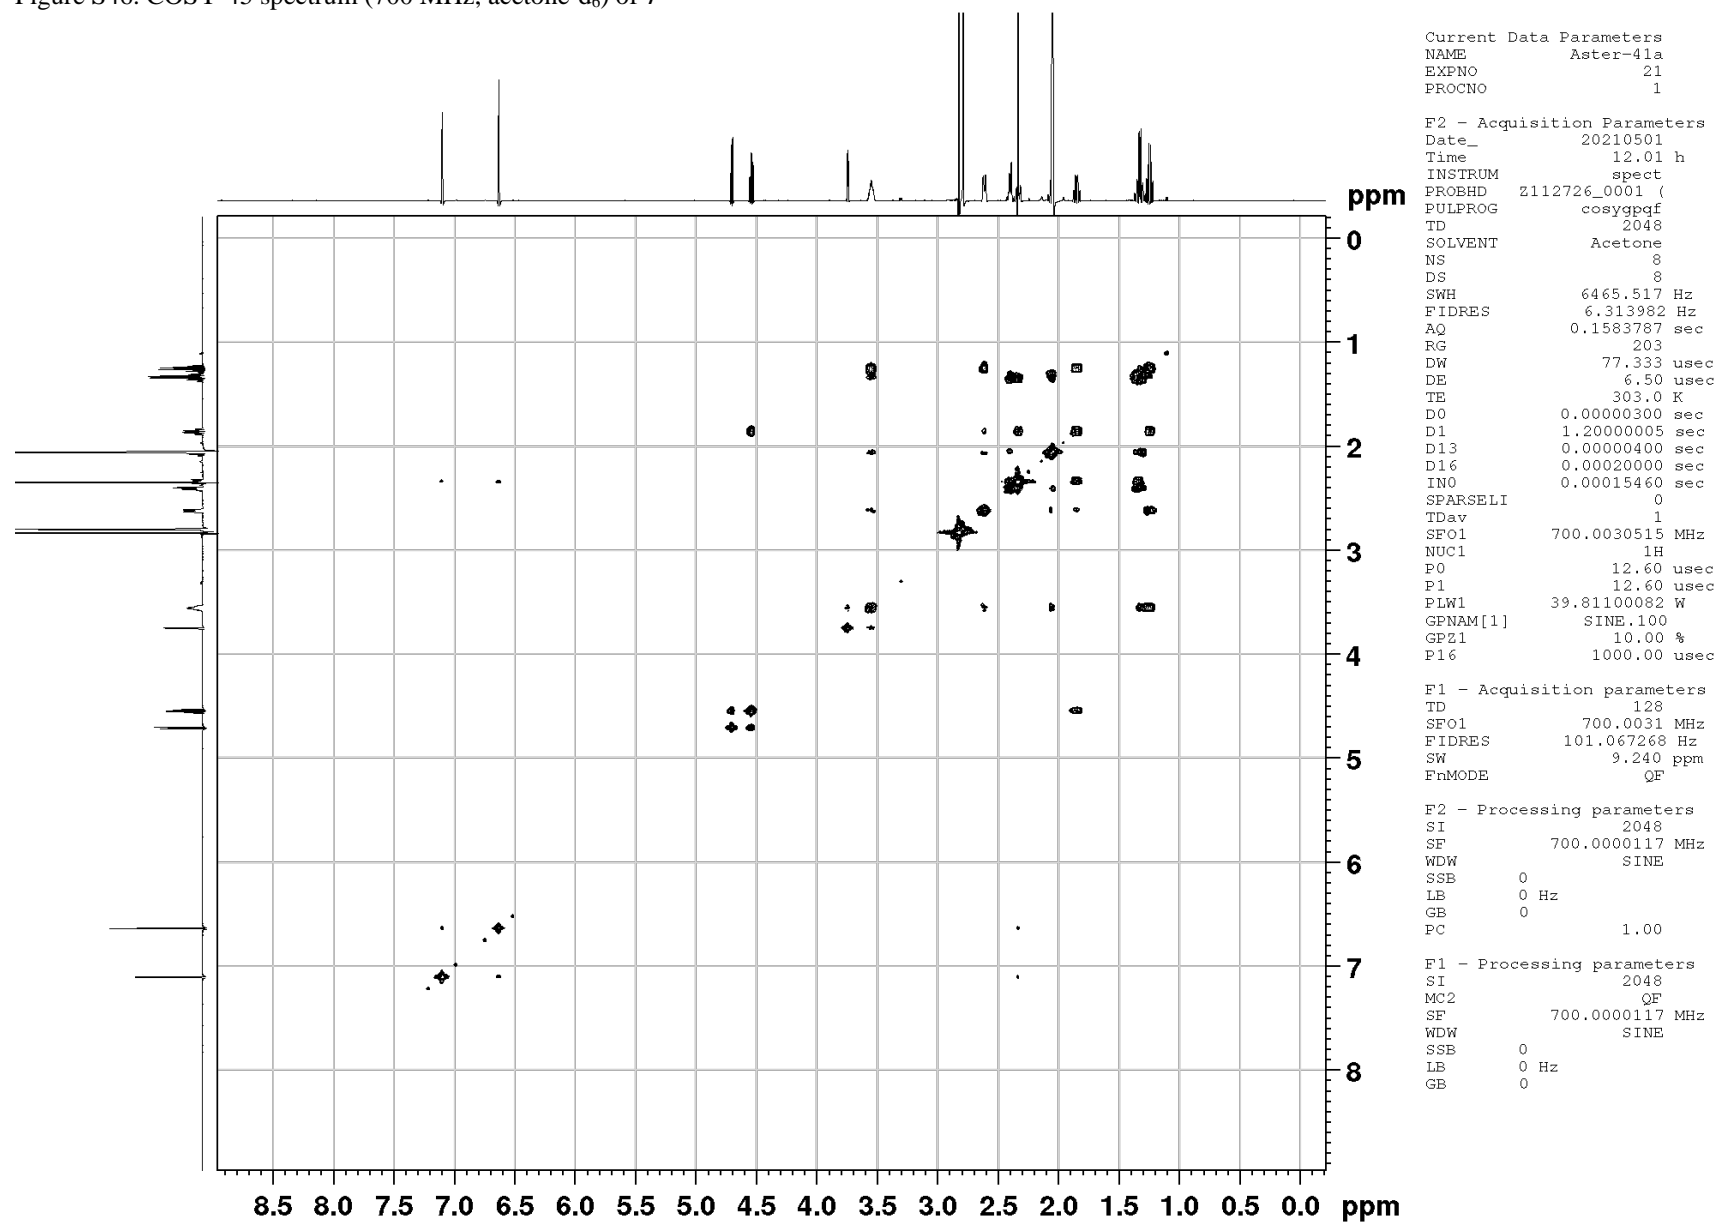



Figure S47. HSQC spectrum (700 MHz, acetone-d<sub>6</sub>) of **7**

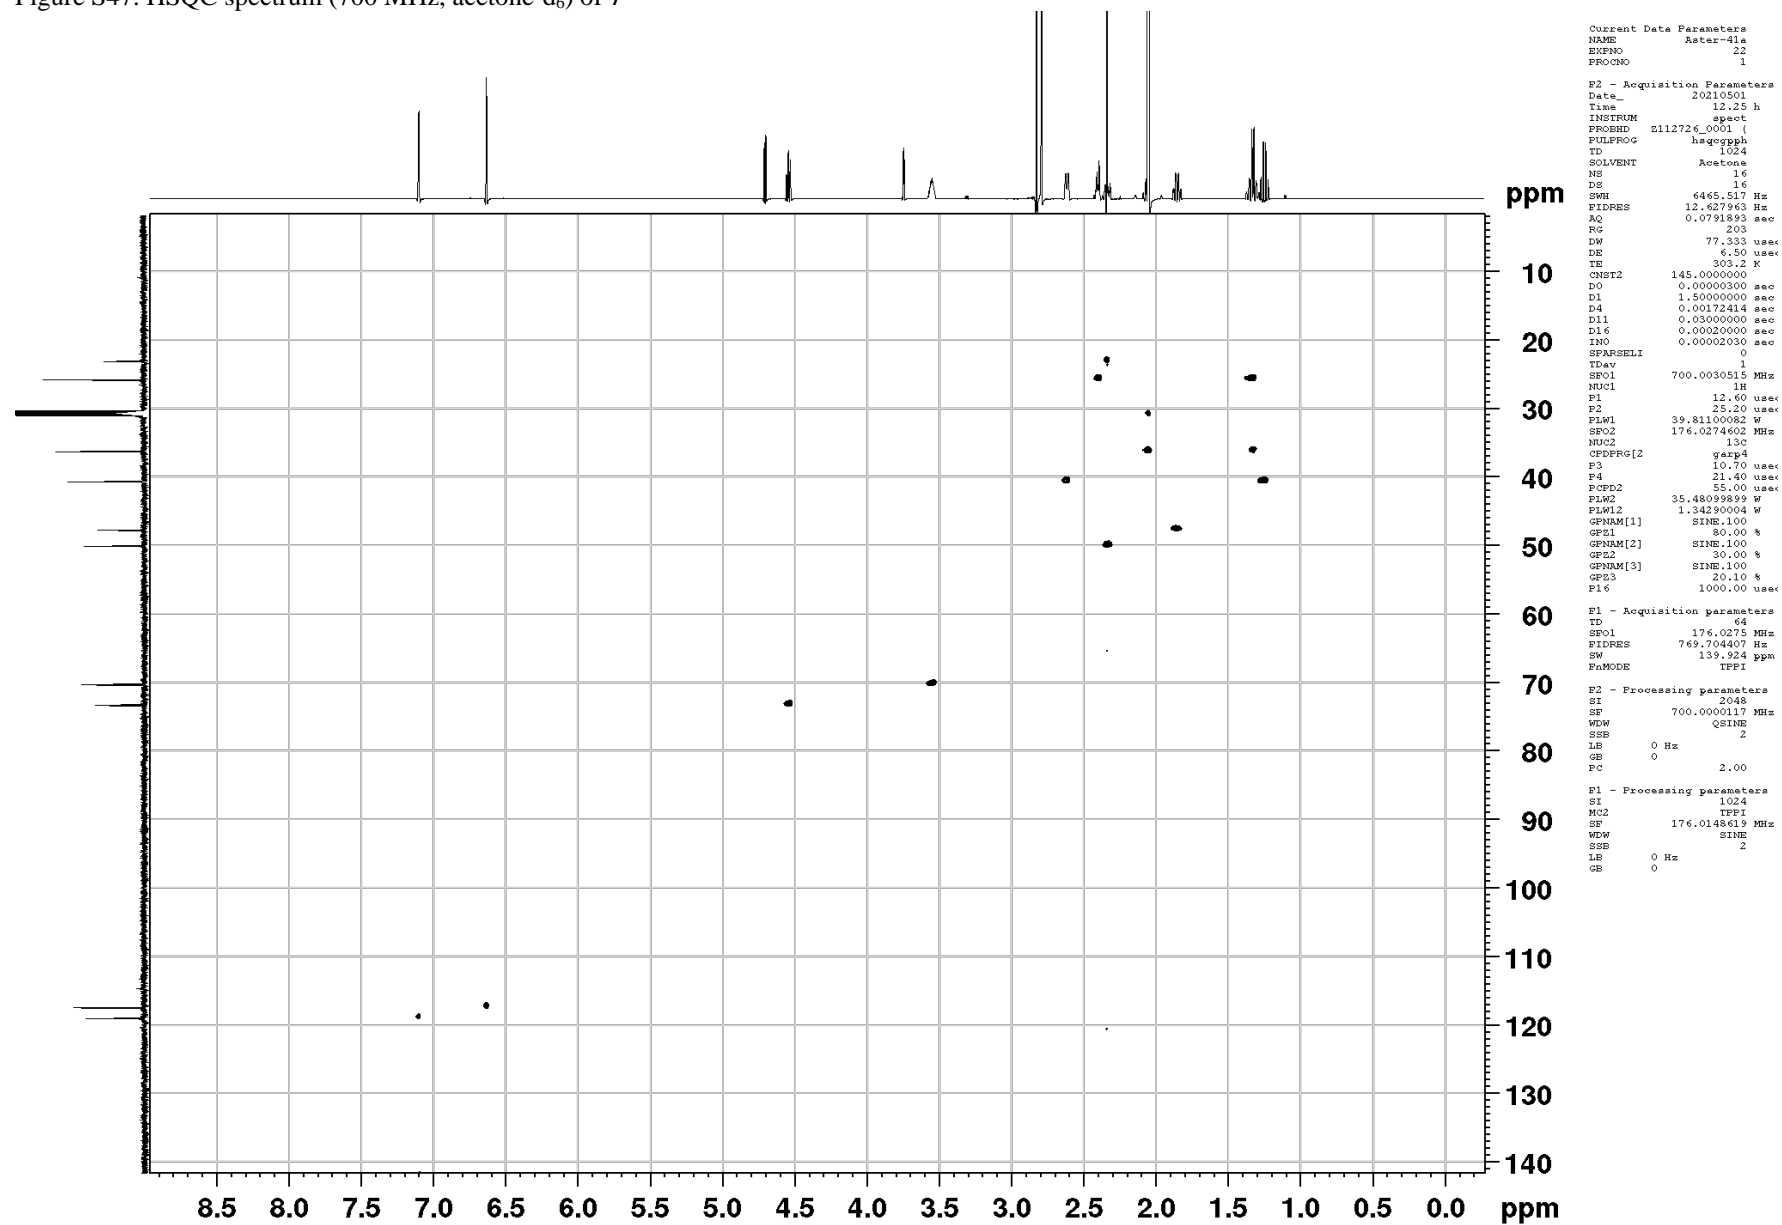

Figure S48. HMBC spectrum (700 MHz, acetone-d<sub>6</sub>) of **7**

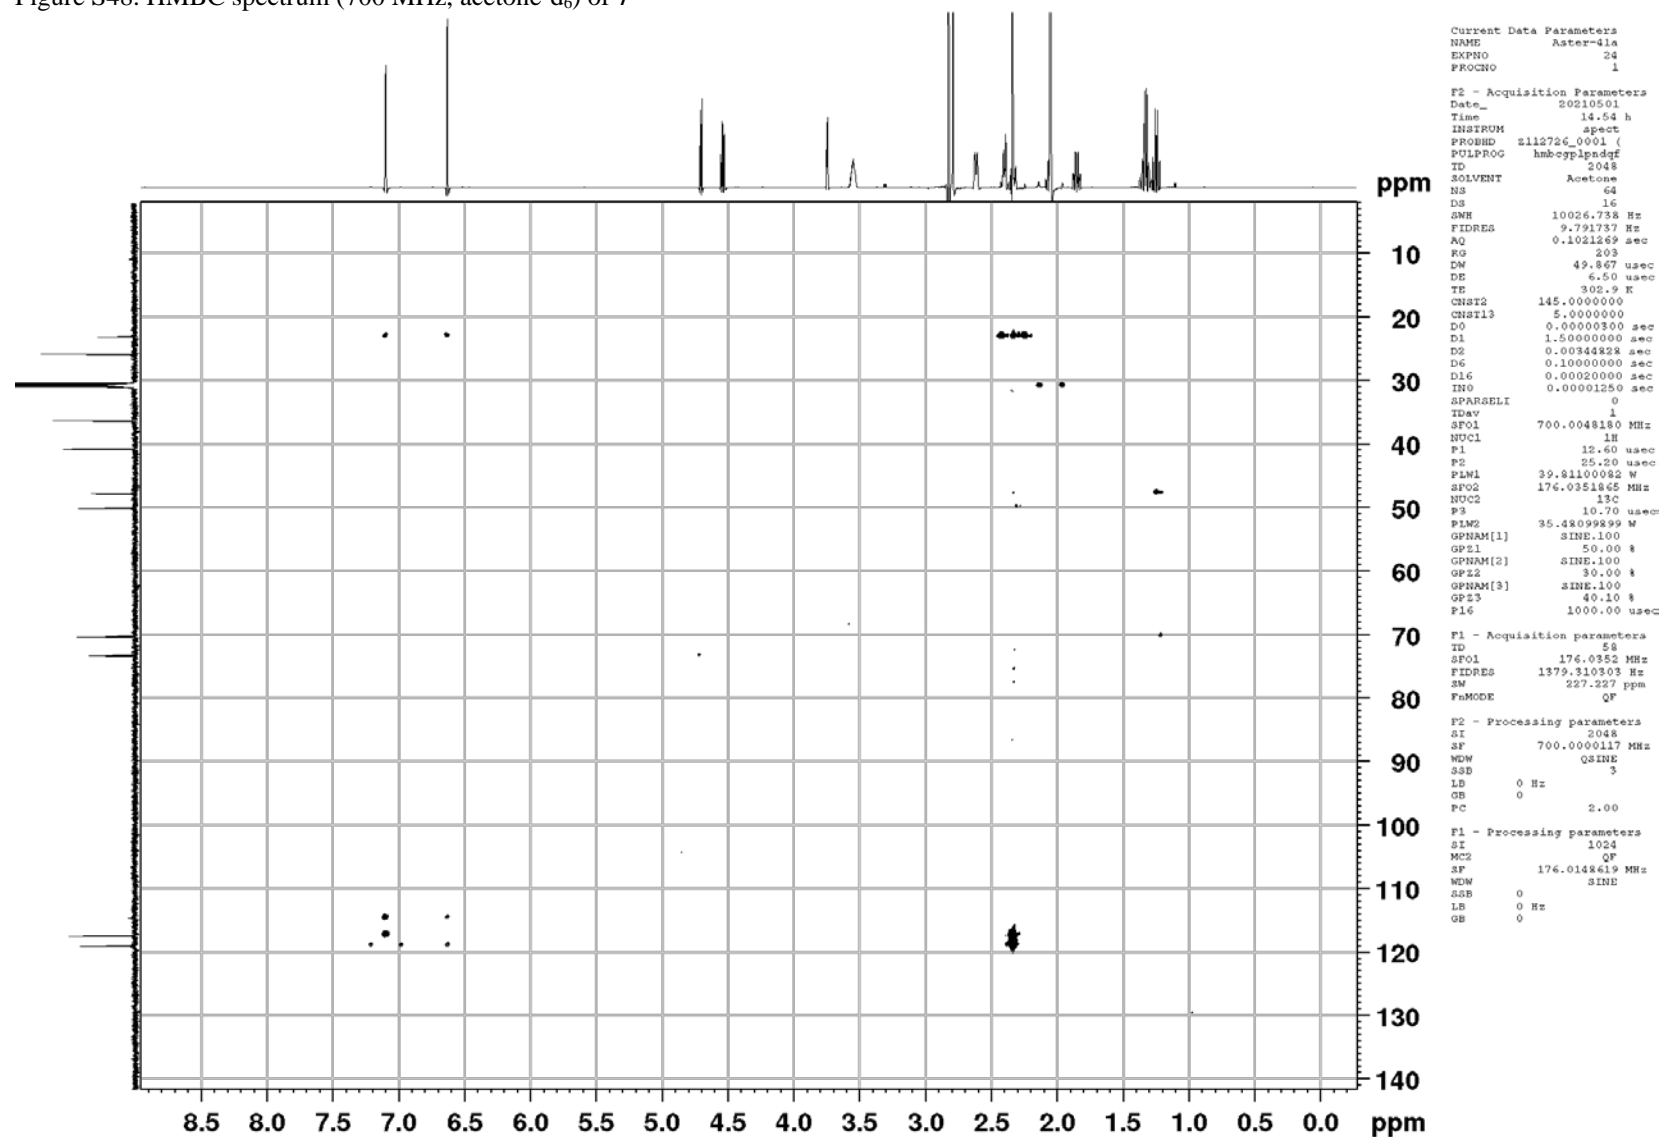

Figure S49. ROESY spectrum (700 MHz, acetone-d<sub>6</sub>) of 7

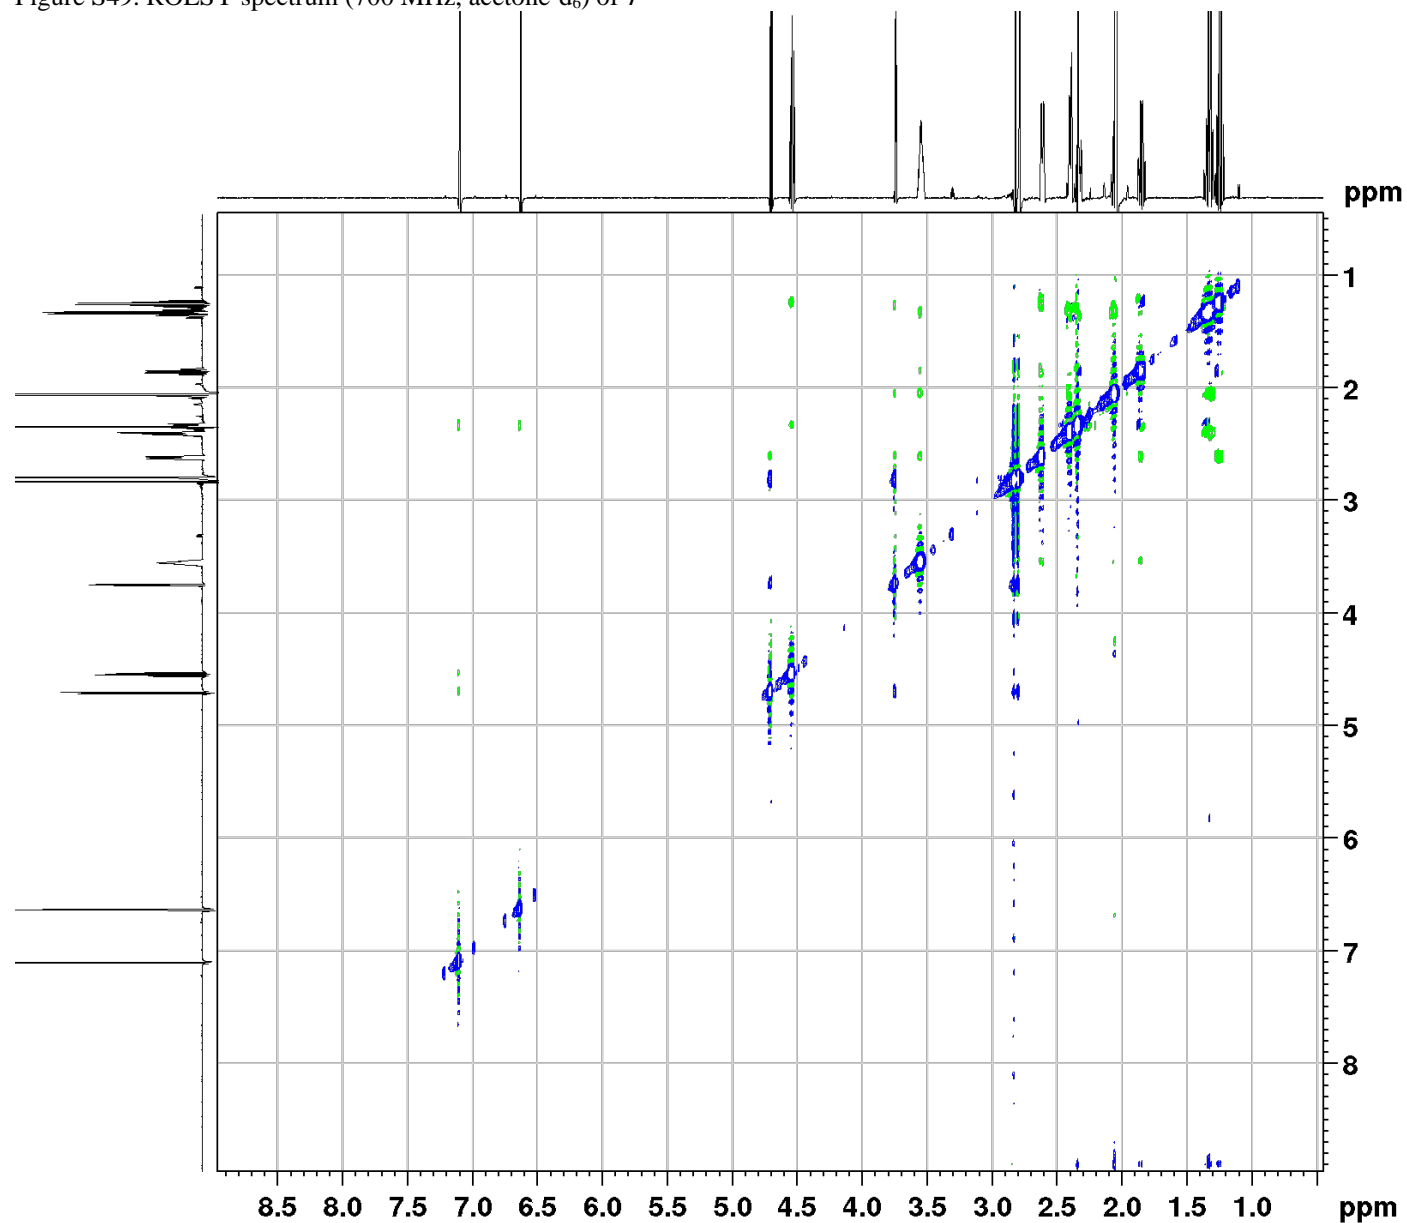

```

Current Data Parameters
NAME      Aster-41a
EXPNO     23
PROCNO    1

F2 - Acquisition Parameters
Date_     20210501
Time      12.53 h
INSTRUM    spect
PROBHD     Z112726_0001 (
PULPROG    roesyph.2
TD         2048
SOLVENT     Acetone
NS         16
DS         16
SWH         6465.517 Hz
FIDRES      6.313982 Hz
AQ         0.1583787 sec
RG         2
DW         77.333 usec
DE         6.50 usec
TE         303.0 K
D0         0.00006528 sec
D1         2.00000000 sec
D12        0.00002000 sec
IN0        0.00015460 sec
L4         877
P15        270000.00 usec
TDav       1
SF01       700.0030515 MHz
NUC1       1H
P1         12.60 usec
P25        154.00 usec
PLW1       39.81100082 W
PLW27      1.06599998 W

F1 - Acquisition parameters
TD         183
SF01       700.0033 MHz
FIDRES     70.691864 Hz
SW         9.240 ppm
FnMODE     TPPI

F2 - Processing parameters
SI         2048
SF         700.0000074 MHz
WDW        SINE
SSB        2
LB         0 Hz
GB         0
PC         4.00

F1 - Processing parameters
SI         512
MC2        TPPI
SF         700.0002528 MHz
WDW        SINE
SSB        2
LB         0 Hz
GB         0
    
```

Figure S50. <sup>1</sup>H NMR spectrum (700 MHz, acetone-d<sub>6</sub>) of **8**

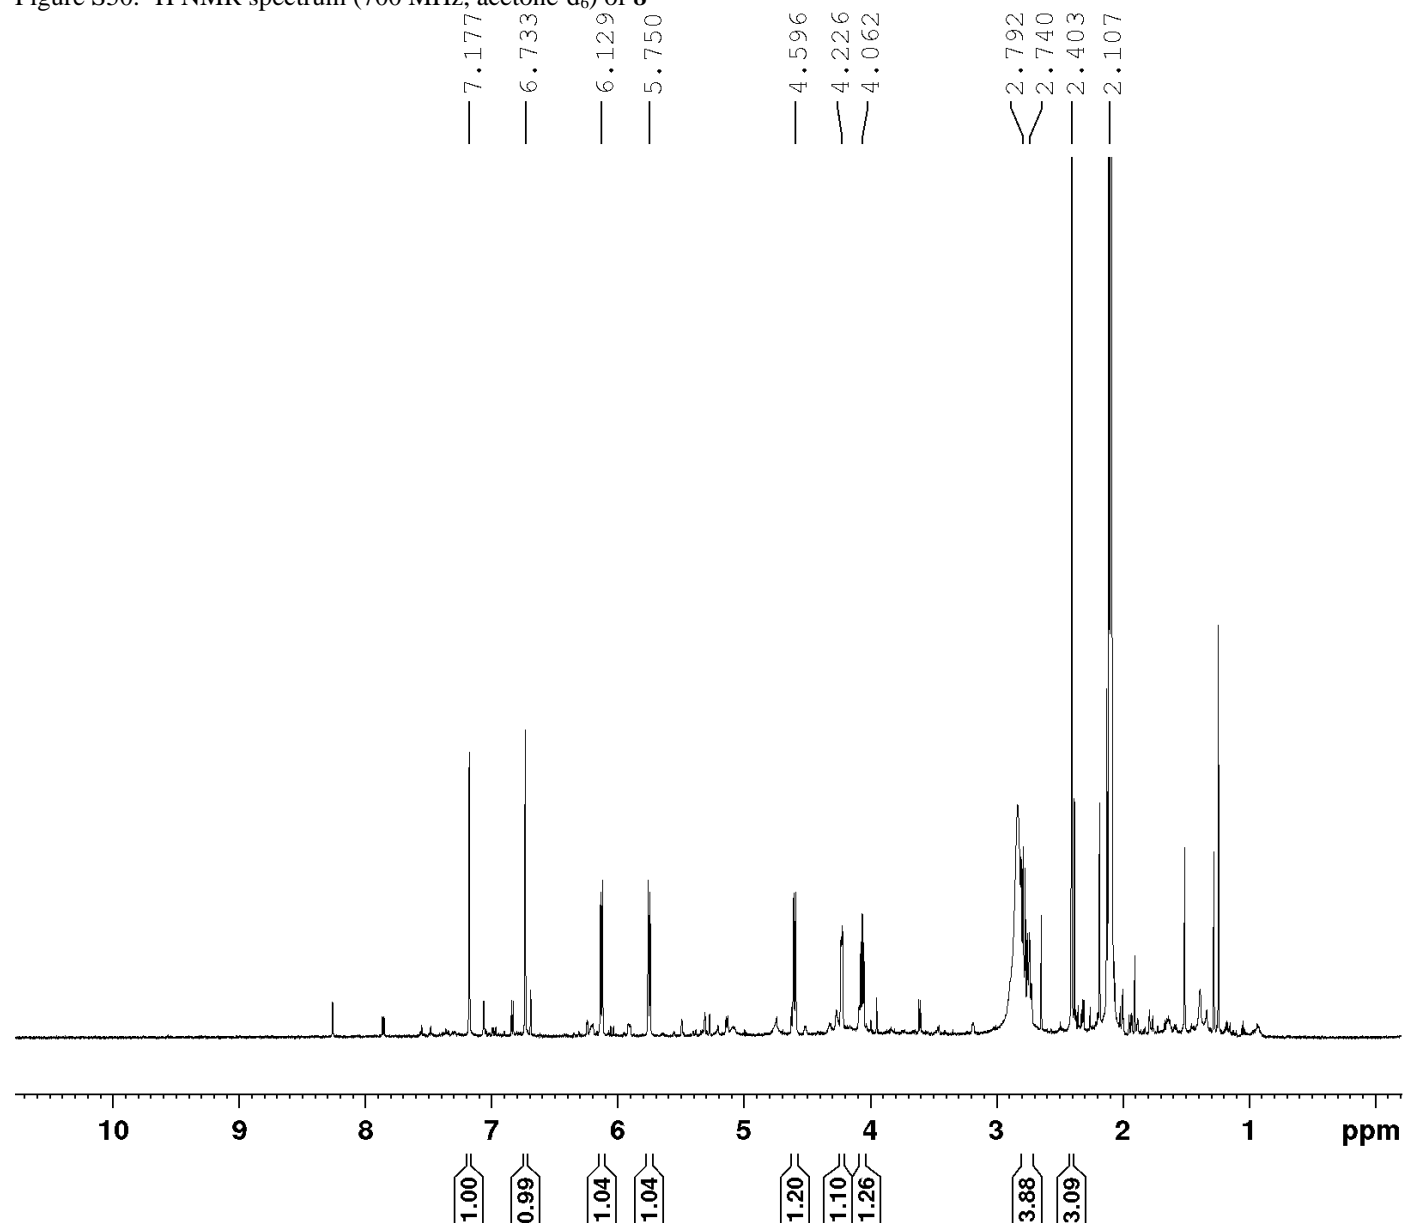

Current Data Parameters  
 NAME Aster-3  
 EXPNO 1  
 PROCNO 1

F2 - Acquisition Parameters  
 Date\_ 20210211  
 Time 16.27 h  
 INSTRUM spect  
 PROBHD Z112726\_0001 (   
 PULPROG zg30  
 TD 32768  
 SOLVENT Acetone  
 NS 8  
 DS 2  
 SWH 11160.714 Hz  
 FIDRES 0.681196 Hz  
 AQ 1.4680064 sec  
 RG 203  
 DW 44.800 usec  
 DE 6.50 usec  
 TE 303.1 K  
 D1 2.00000000 sec  
 TD0 1  
 SFO1 700.0053900 MHz  
 NUC1 1H  
 P0 4.20 usec  
 P1 12.60 usec  
 PLW1 39.81100082 W

F2 - Processing parameters  
 SI 32768  
 SF 699.9999836 MHz  
 WDW EM  
 SSB 0  
 LB 0.30 Hz  
 GB 0  
 PC 1.00

Figure S51.  $^{13}\text{C}$  NMR spectrum (176.04 MHz, acetone- $\text{d}_6$ ) of **8**

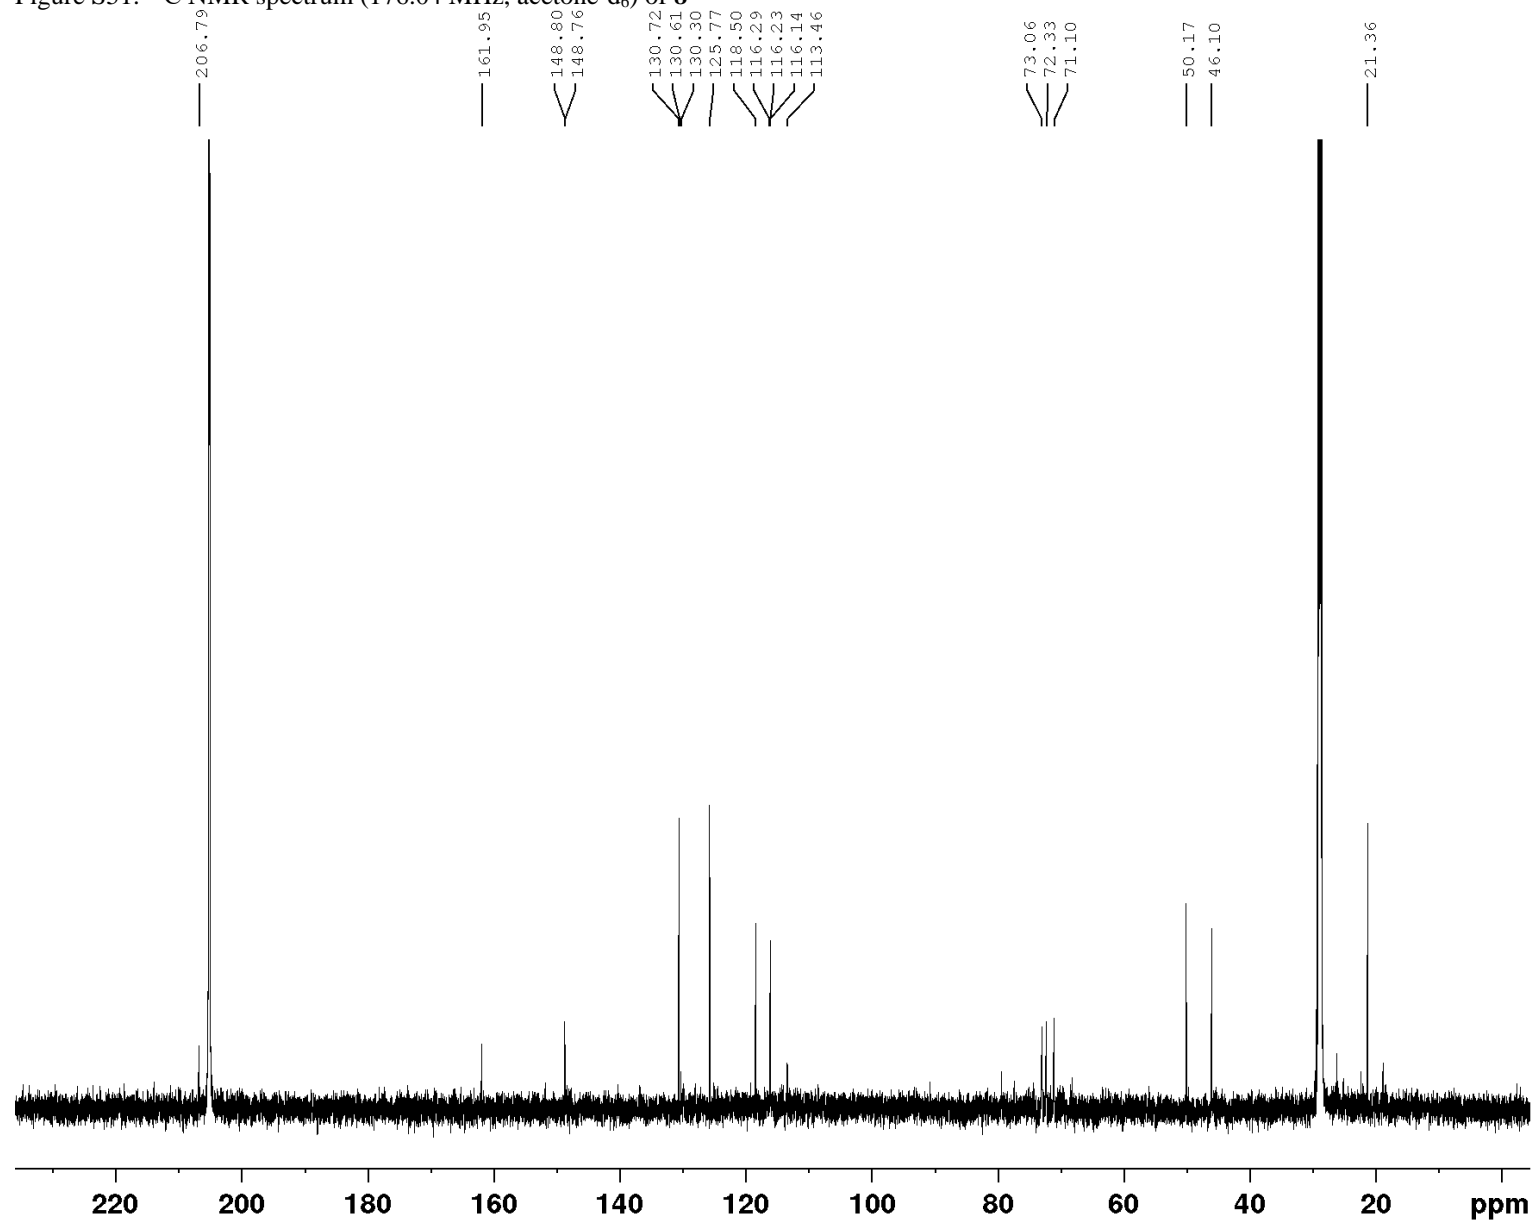

Current Data Parameters  
NAME Aster-3  
EXPNO 25  
PROCNO 1

F2 - Acquisition Parameters  
Date\_ 20210212  
Time 4.35 h  
INSTRUM spect  
PROBHD z112726\_0001 (  
PULPROG zgpg30  
TD 32768  
SOLVENT Acetone  
NS 5120  
DS 2  
SWH 42613.637 Hz  
FIDRES 2.600930 Hz  
AQ 0.3844779 sec  
RG 203  
DW 11.733 usec  
DE 6.50 usec  
TE 303.5 K  
D1 1.50000000 sec  
D11 0.03000000 sec  
TD0 64  
SFO1 176.0353807 MHz  
NUC1 13C  
P0 3.50 usec  
P1 10.50 usec  
PLW1 35.48099899 W  
SFO2 700.0035000 MHz  
NUC2 1H  
CPDPRG2 waltz16  
PCPD2 70.00 usec  
PLW2 39.81100082 W  
PLW12 1.43719995 W  
PLW13 0.83929998 W

F2 - Processing parameters  
SI 65536  
SF 176.0151411 MHz  
WDW EM  
SSB 0  
LB 1.50 Hz  
GB 0  
PC 1.40

Figure S52. DEPT-135 spectrum (176.04 MHz, acetone-d<sub>6</sub>) of 8

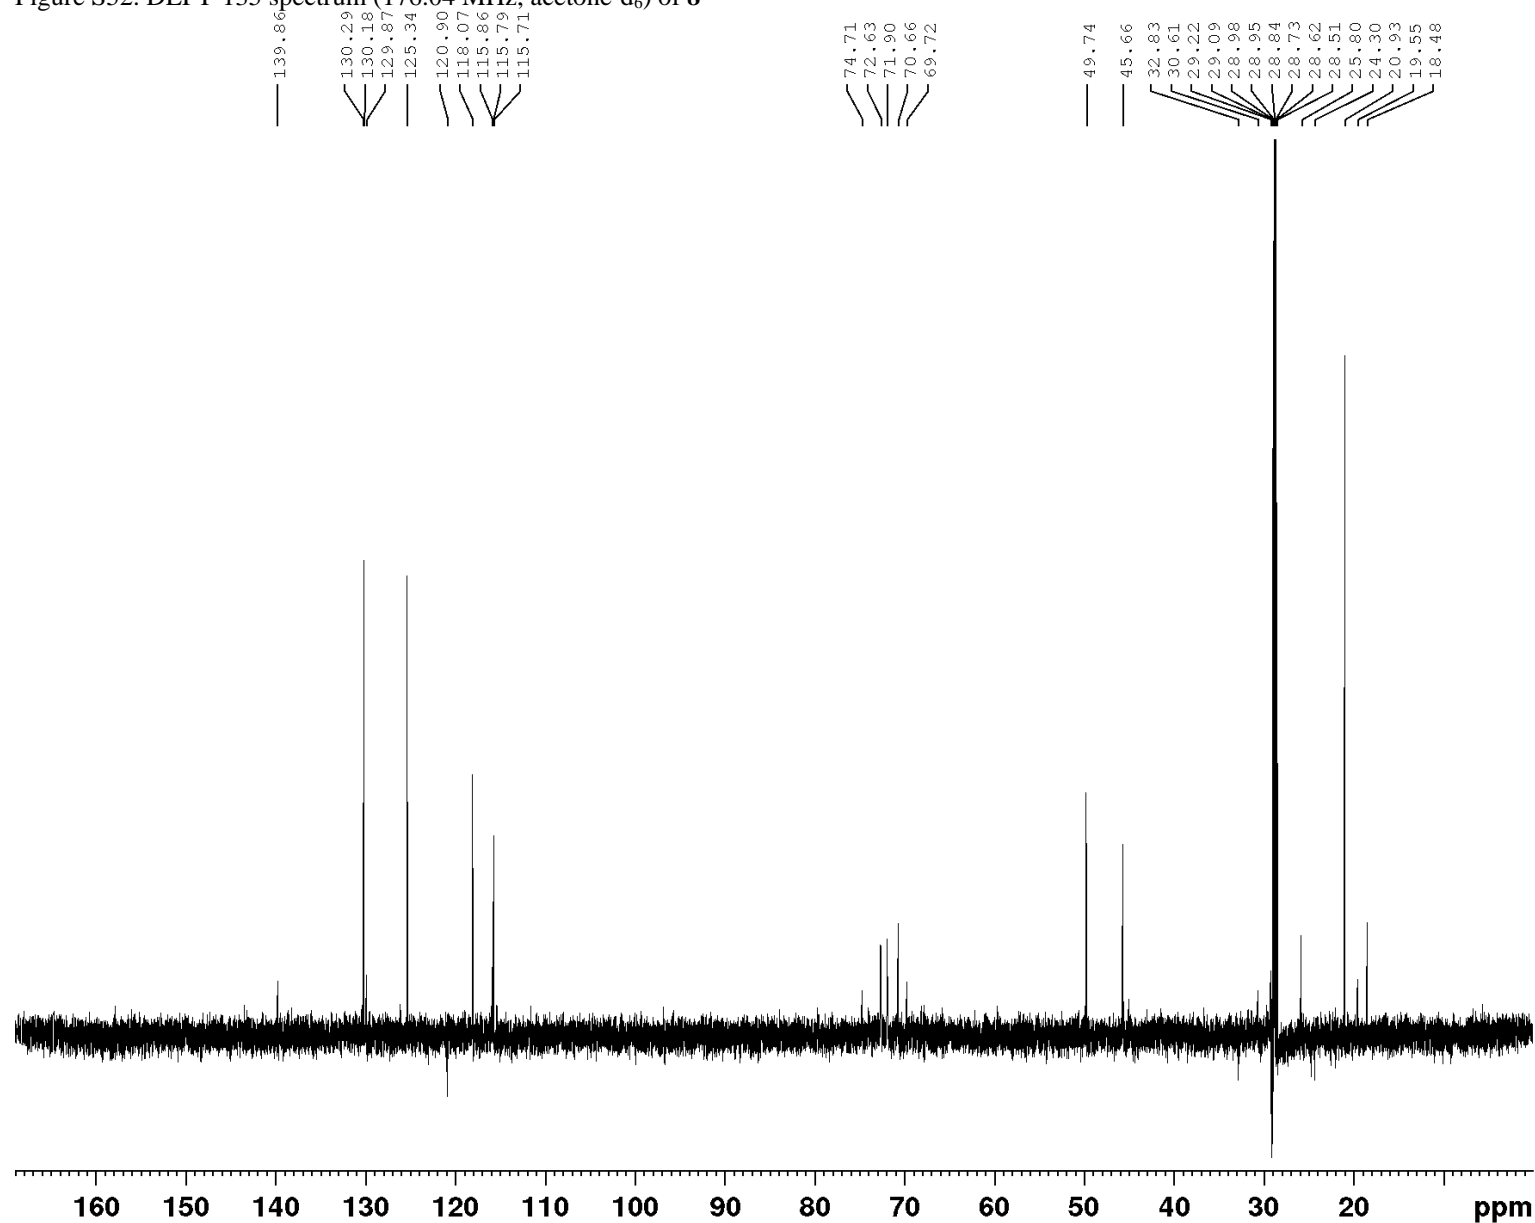

Current Data Parameters  
NAME Aster-3  
EXPNO 26  
PROCNO 1

F2 - Acquisition Parameters  
Date\_ 20210212  
Time 9.04 h  
INSTRUM spect  
PROBHD Z112726\_0001 (  
PULPROG deptap135  
TD 65536  
SOLVENT Acetone  
NS 5120  
DS 2  
SWH 29761.904 Hz  
FIDRES 0.908261 Hz  
AQ 1.1010048 sec  
RG 203  
DW 16.800 usec  
DE 6.50 usec  
TE 302.8 K  
CNST2 145.0000000  
D1 2.00000000 sec  
D2 0.00344828 sec  
D12 0.00002000 sec  
TD0 64  
SFO1 176.0301003 MHz  
NUC1 13C  
P1 10.50 usec  
P13 2000.00 usec  
PLW0 0 W  
PLW1 35.48099899 W  
SPNAM[5] Crp80comp.4  
SFOALS 0.500  
SPOFFS5 0 Hz  
SPW5 7.96899986 W  
SFO2 700.0028000 MHz  
NUC2 1H  
CPDPRG[2] waltz16  
P3 13.30 usec  
P4 26.60 usec  
PCPD2 70.00 usec  
PLW2 39.81100082 W  
PLW12 1.43719995 W

F2 - Processing parameters  
SI 65536  
SF 176.0152175 MHz  
WDW EM  
SSB 0  
LB 1.00 Hz  
GB 0  
PC 1.40

Figure S53. COSY-45 spectrum (700 MHz, acetone-d<sub>6</sub>) of **8**

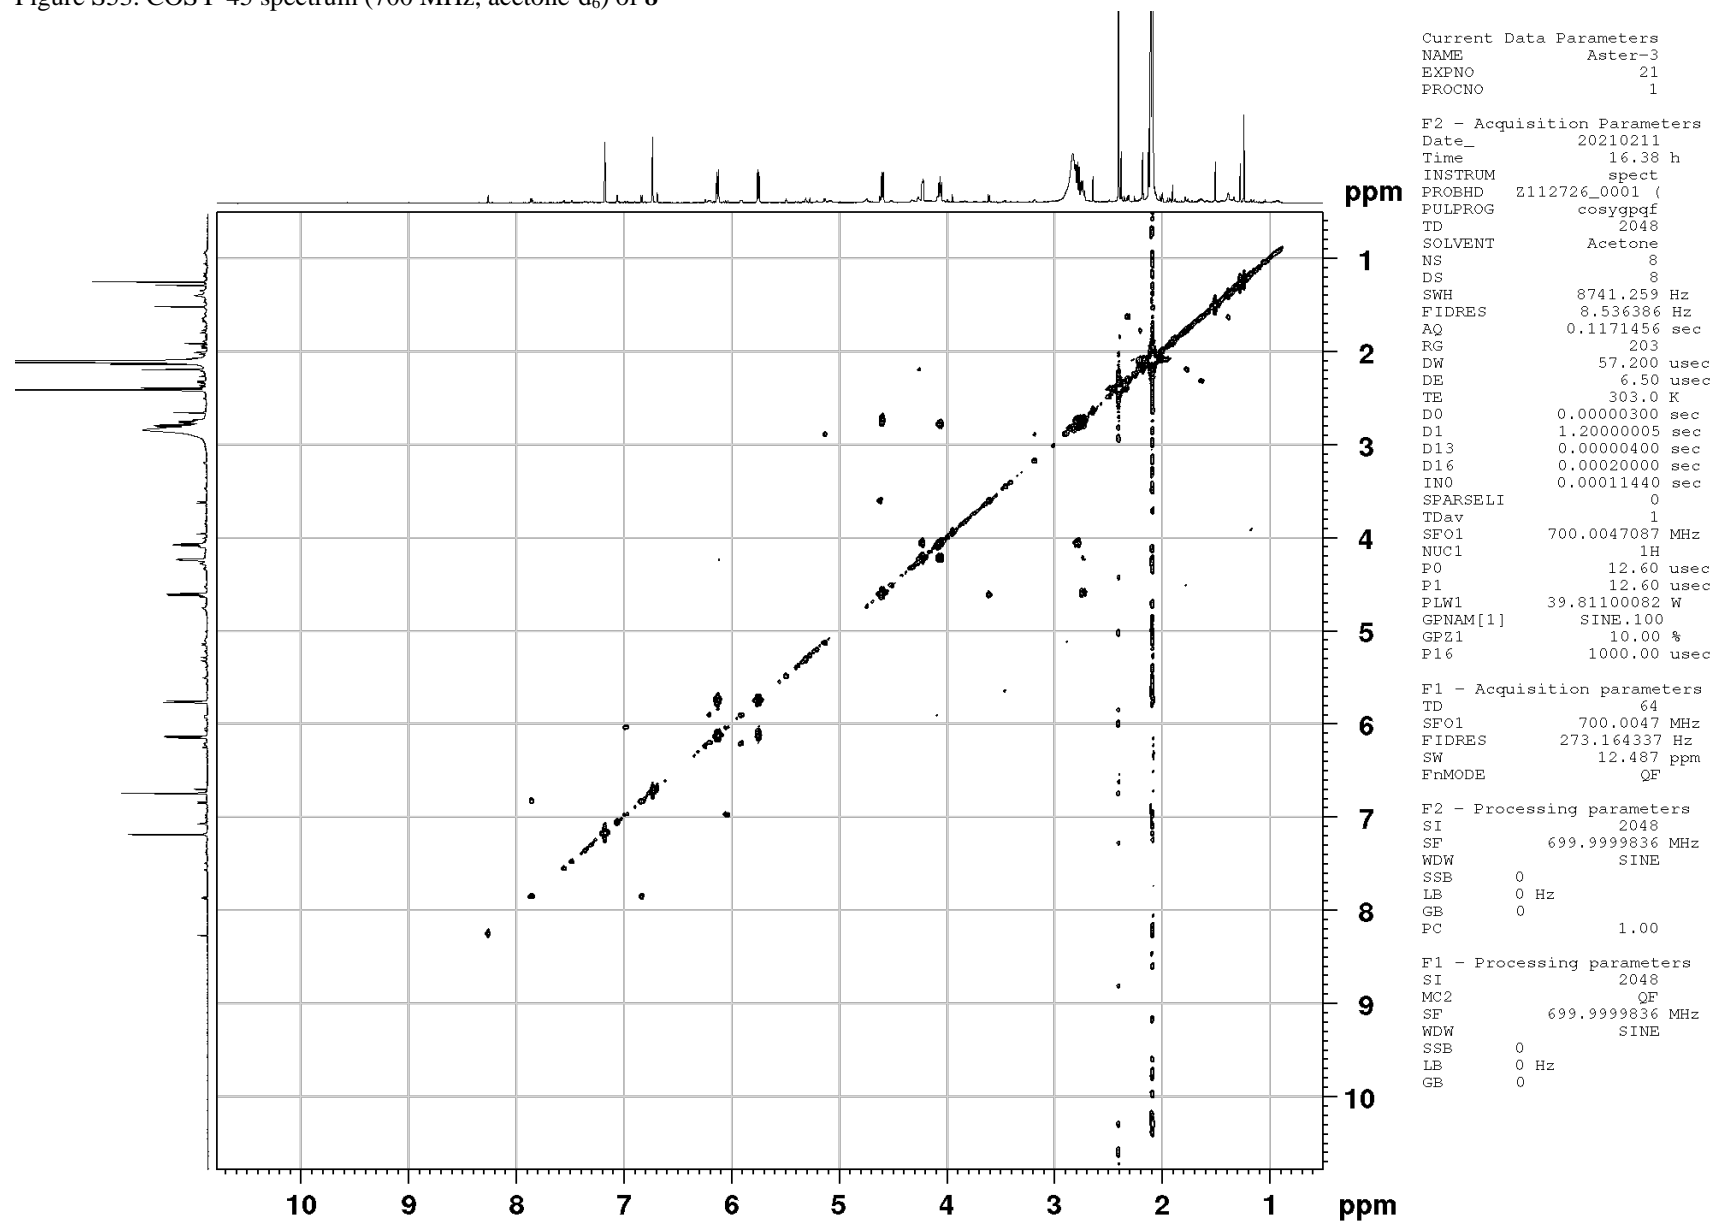

Figure S54. HSQC spectrum (700 MHz, acetone-d<sub>6</sub>) of **8**

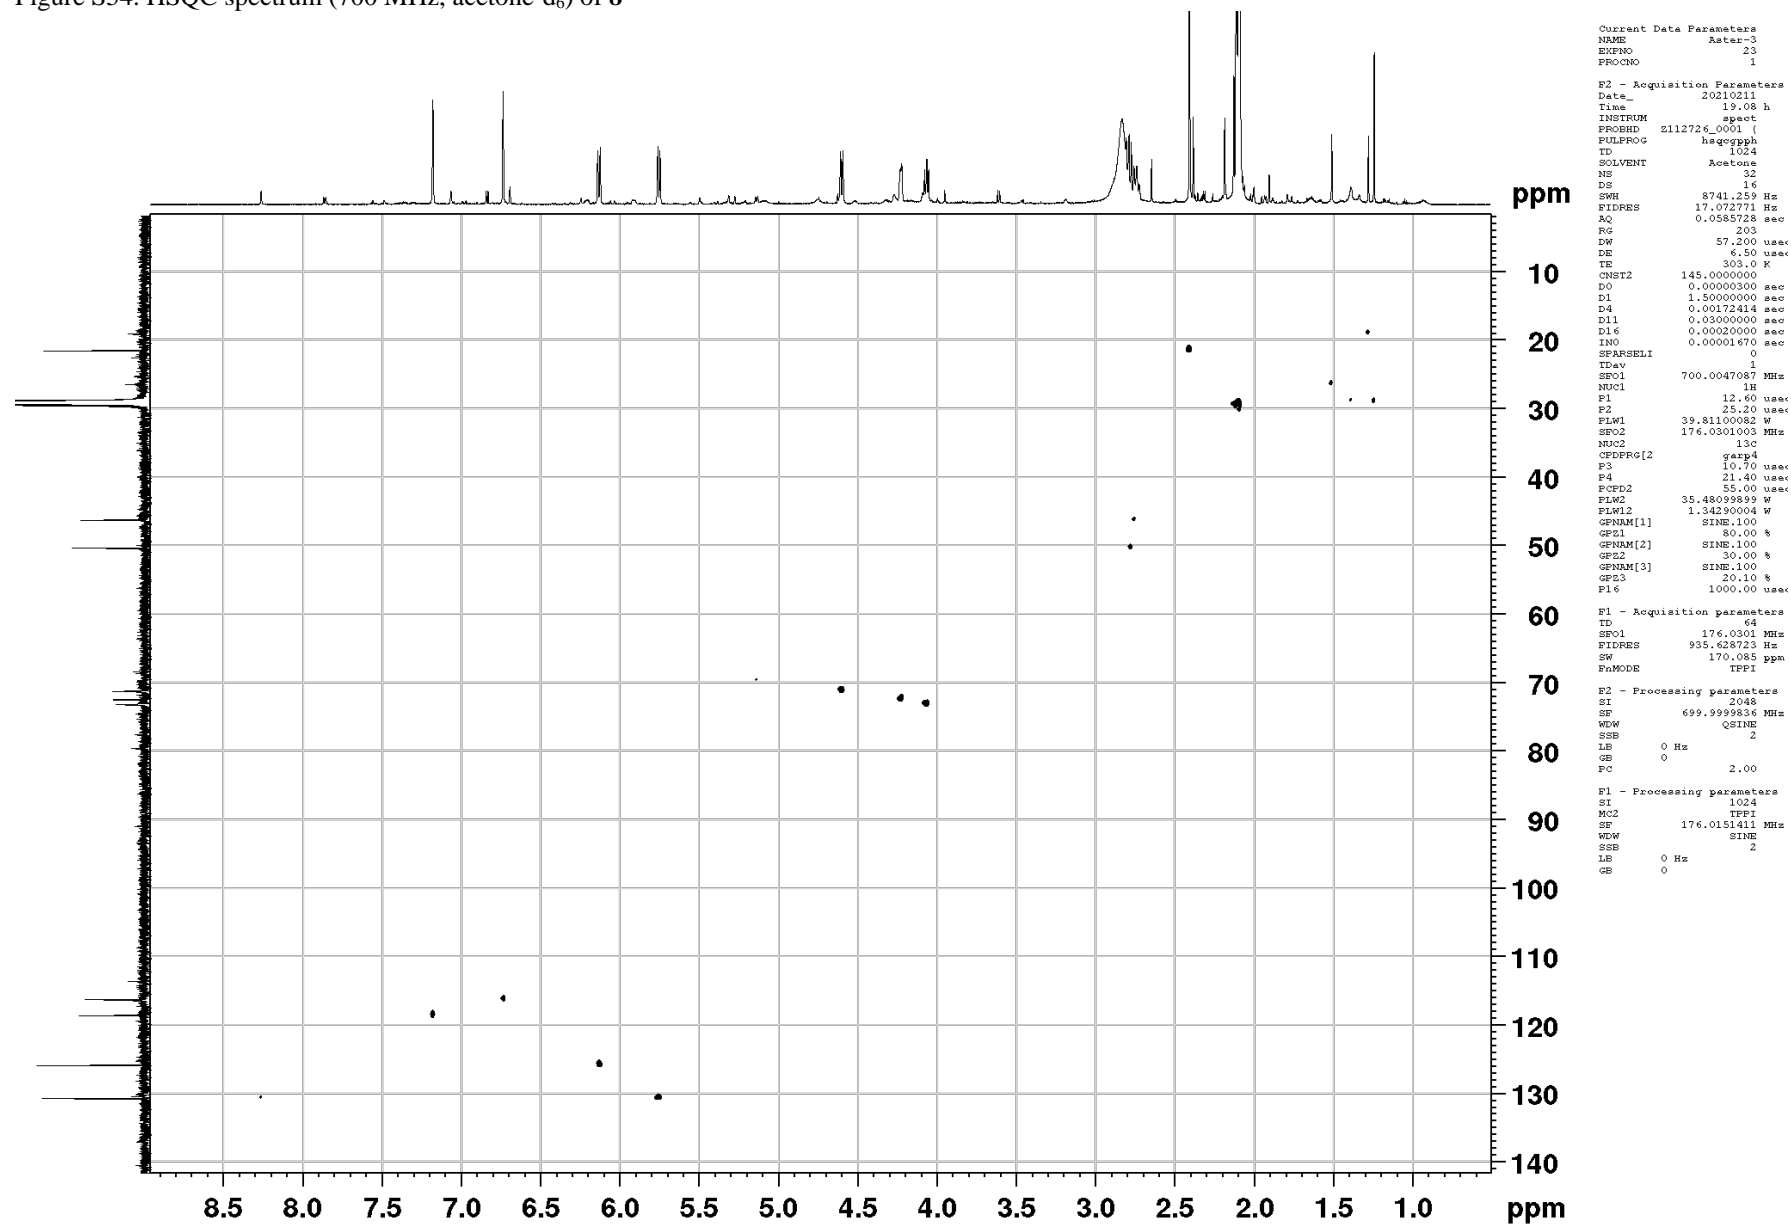



Figure S55. HMBC spectrum (700 MHz, acetone-d<sub>6</sub>) of **8**

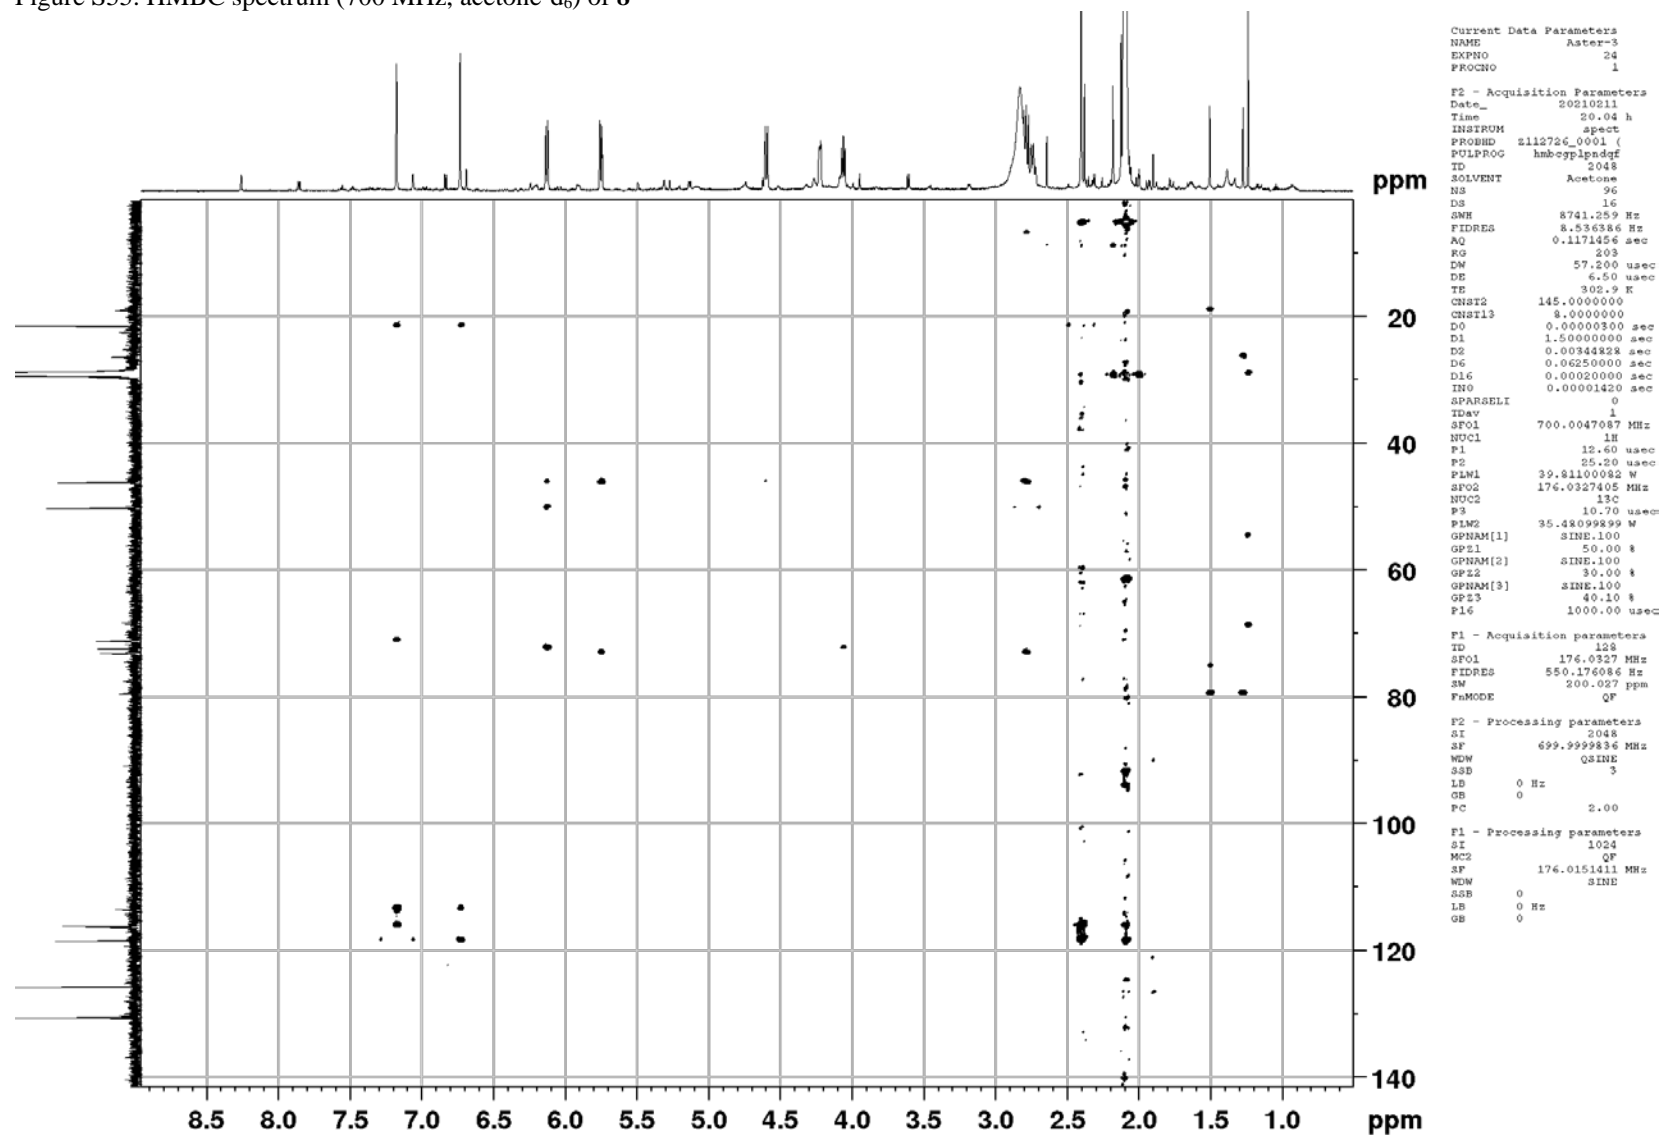

Figure S56. ROESY spectrum (700 MHz, acetone-d<sub>6</sub>) of **8**

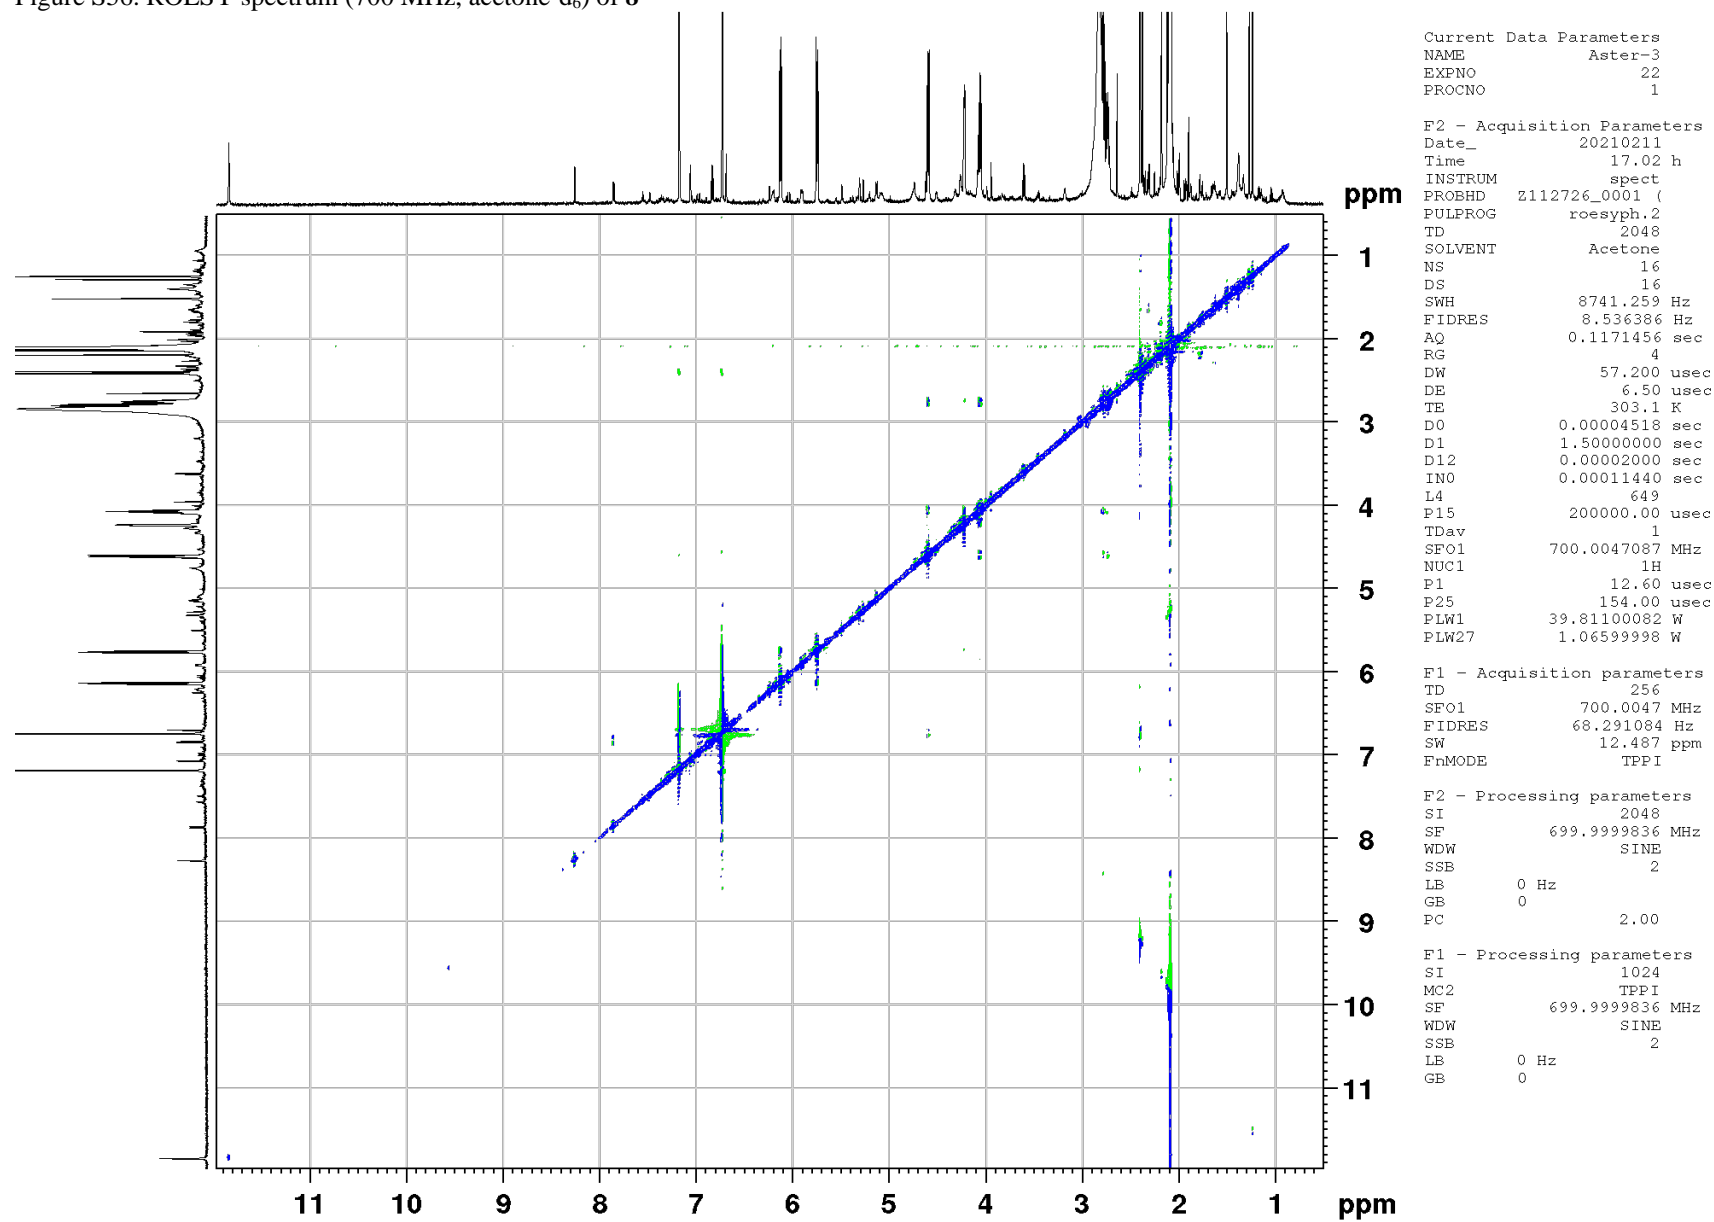

Figure S57. <sup>1</sup>H NMR spectrum (500 MHz, acetone-d<sub>6</sub>) of **9**

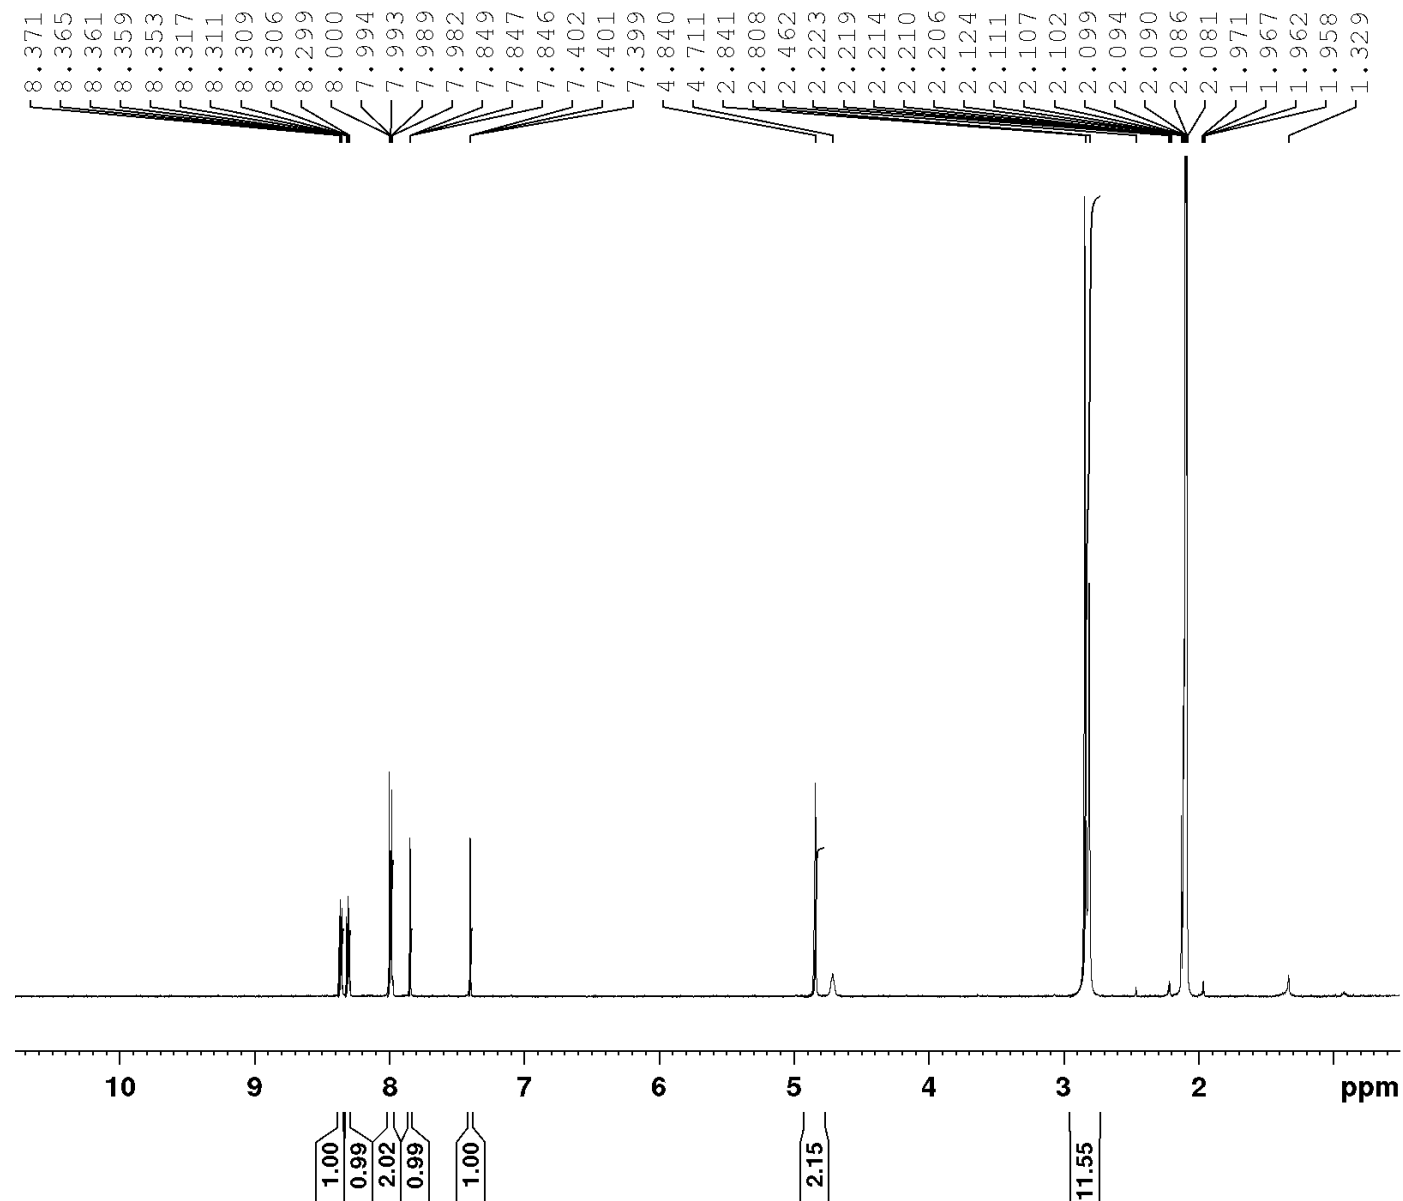

Current Data Parameters

|        |          |
|--------|----------|
| NAME   | Aster-12 |
| EXPNO  | 5        |
| PROCNO | 1        |

F2 - Acquisition Parameters

|         |                 |
|---------|-----------------|
| Date_   | 20210218        |
| Time    | 15.12 h         |
| INSTRUM | spect           |
| PROBHD  | Z113652_0155 (  |
| PULPROG | zg30            |
| TD      | 32768           |
| SOLVENT | Acetone         |
| NS      | 1               |
| DS      | 2               |
| SWH     | 6493.506 Hz     |
| FIDRES  | 0.396332 Hz     |
| AQ      | 2.5231359 sec   |
| RG      | 119.65          |
| DW      | 77.000 usec     |
| DE      | 6.50 usec       |
| TE      | 303.2 K         |
| D1      | 2.00000000 sec  |
| TD0     | 1               |
| SFO1    | 500.1334933 MHz |
| NUC1    | 1H              |
| P0      | 3.88 usec       |
| P1      | 11.65 usec      |
| PLW1    | 15.84899998 W   |

F2 - Processing parameters

|     |                 |
|-----|-----------------|
| SI  | 65536           |
| SF  | 500.1299935 MHz |
| WDW | EM              |
| SSB | 0               |
| LB  | 0.30 Hz         |
| GB  | 0               |
| PC  | 1.00            |

Figure S58.  $^{13}\text{C}$  NMR spectrum (125.77 MHz, acetone- $\text{d}_6$ ) of **9**

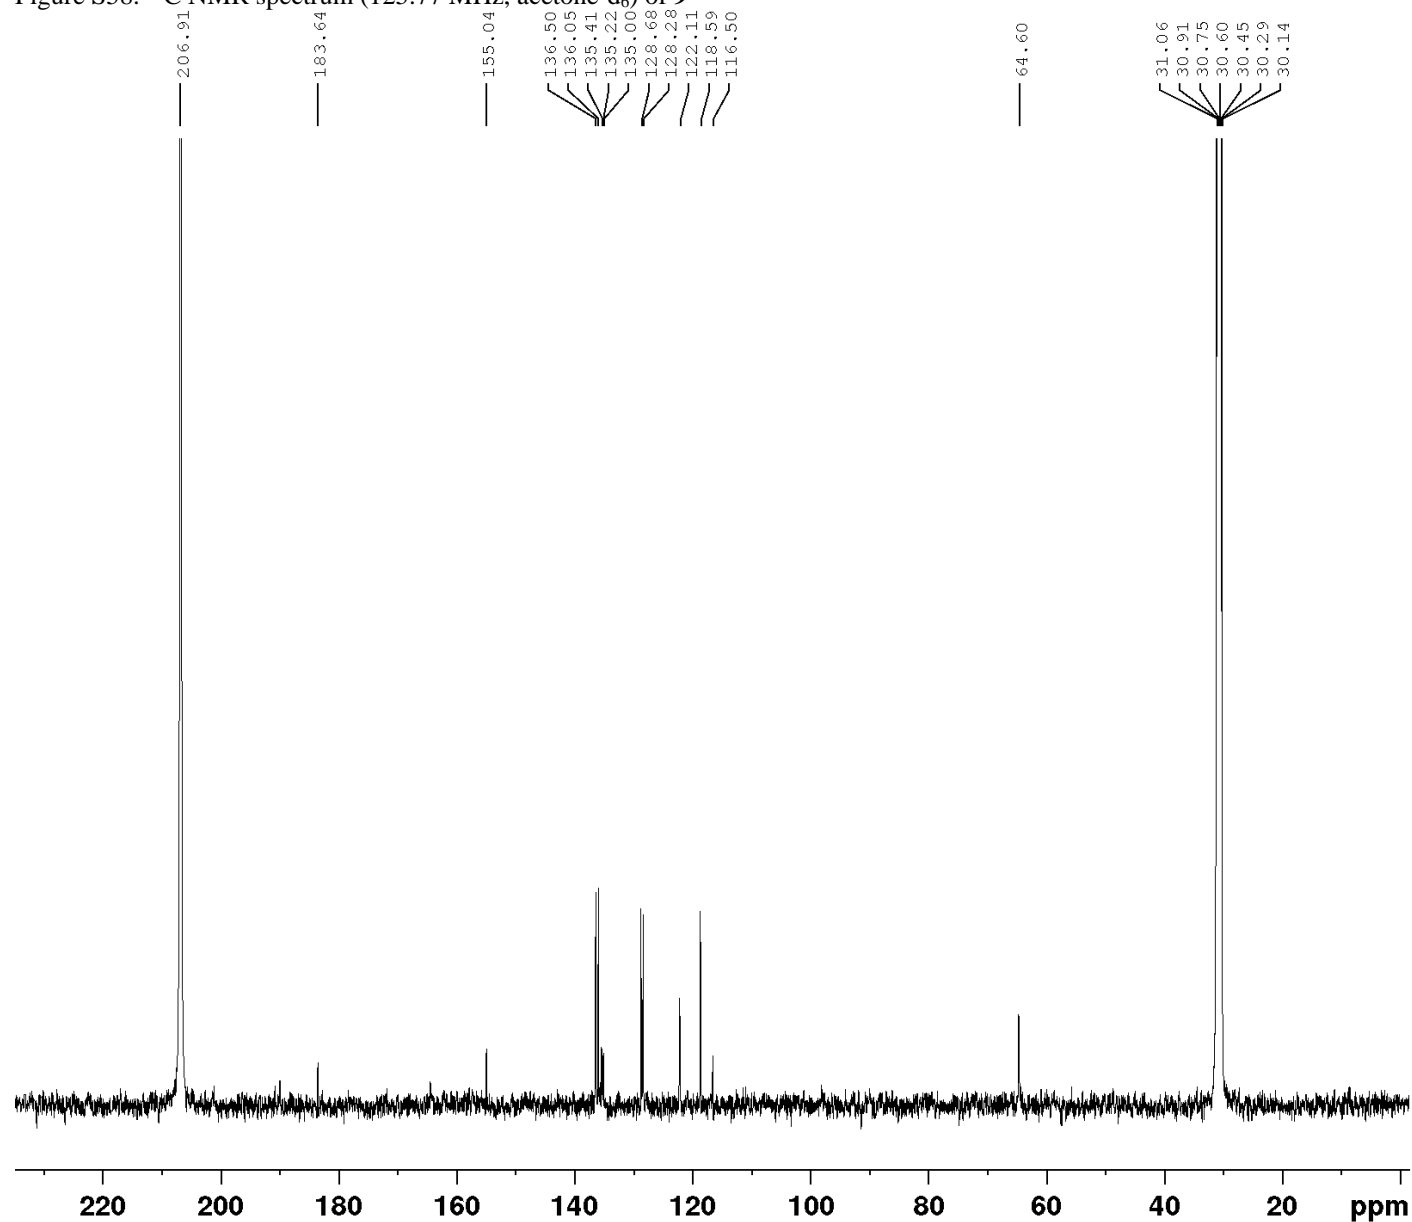

Current Data Parameters  
NAME Aster-12  
EXPNO 25  
PROCNO 1

F2 - Acquisition Parameters  
Date\_ 20210219  
Time 7.35 h  
INSTRUM spect  
PROBHD Z113652\_0155 (  
PULPROG zgpg30  
TD 32768  
SOLVENT Acetone  
NS 2560  
DS 4  
SWH 29761.904 Hz  
FIDRES 1.816522 Hz  
AQ 0.5505024 sec  
RG 196.84  
DW 16.800 usec  
DE 6.50 usec  
TE 303.1 K  
D1 1.50000000 sec  
D11 0.03000000 sec  
TD0 32  
SFO1 125.7722511 MHz  
NUC1  $^{13}\text{C}$   
P0 4.03 usec  
P1 12.10 usec  
PLW1 79.43299866 W  
SFO2 500.1320005 MHz  
NUC2  $^1\text{H}$   
CPDPRG[2] waltz16  
PCPD2 80.00 usec  
PLW2 15.84899998 W  
PLW12 0.33610001 W  
PLW13 0.16906001 W

F2 - Processing parameters  
SI 65536  
SF 125.757577 MHz  
WDW EM  
SSB 0  
LB 5.00 Hz  
GB 0  
PC 1.30

Figure S59. DEPT-135 spectrum (125.77 MHz, acetone-d<sub>6</sub>) of **9**

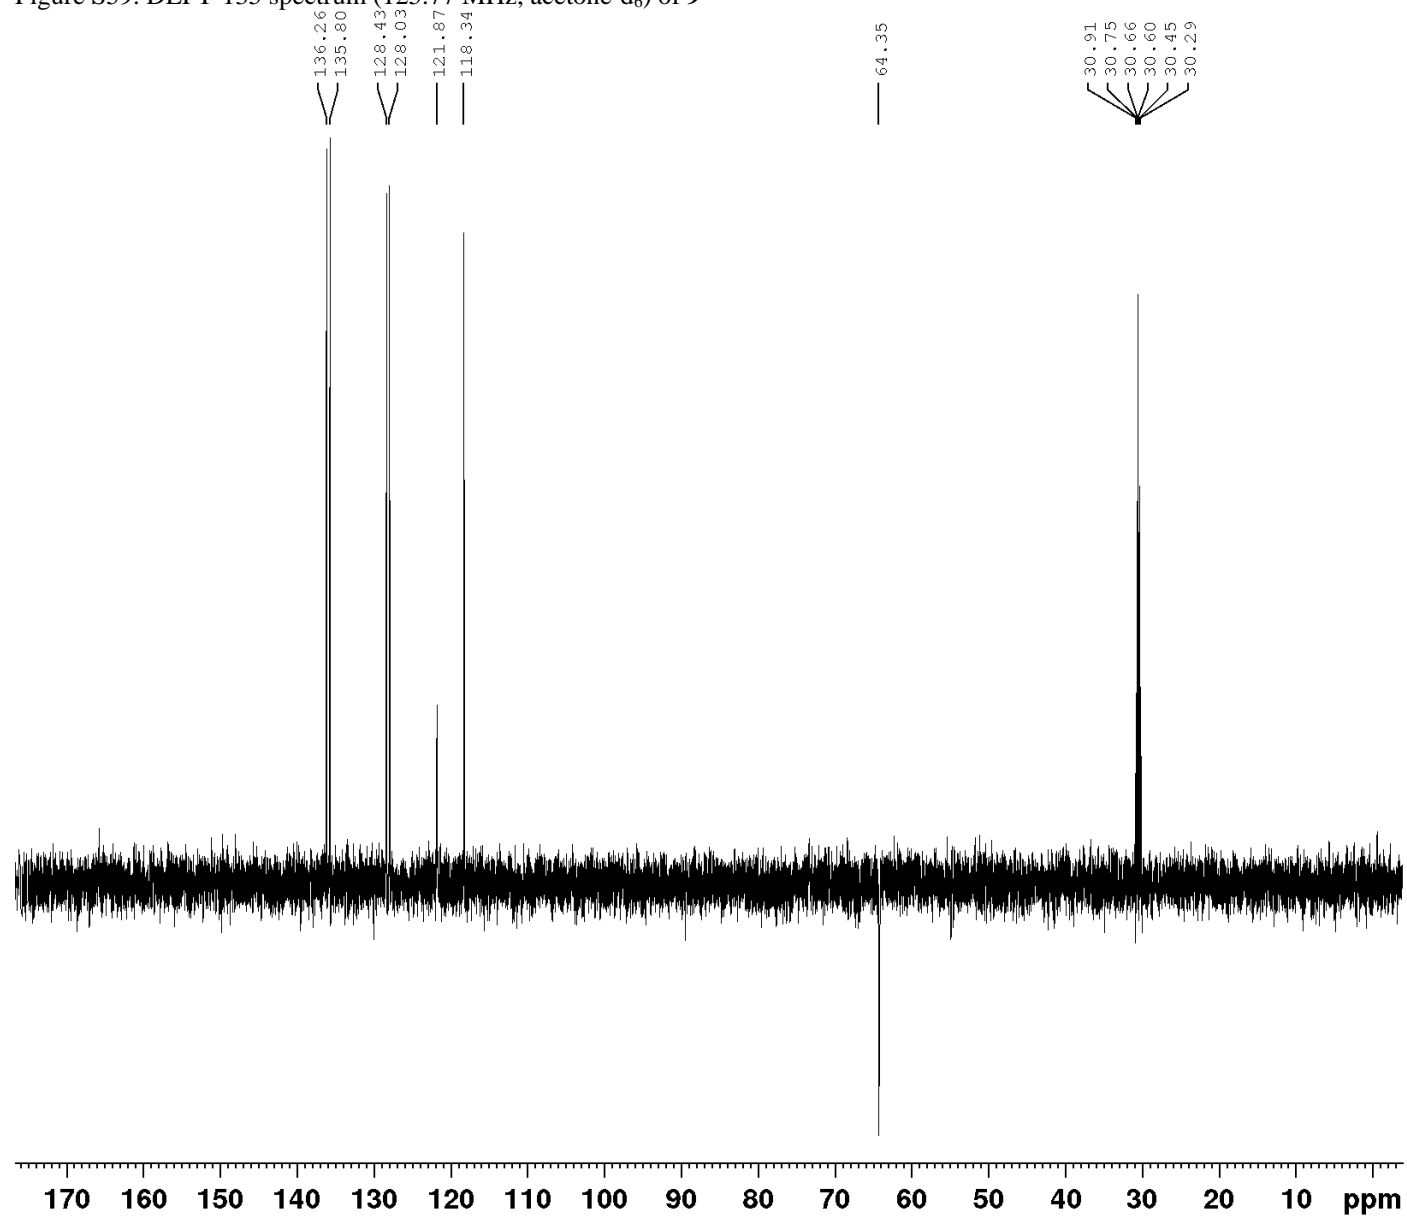

Current Data Parameters  
NAME Aster-12  
EXPNO 26  
PROCNO 1

F2 - Acquisition Parameters  
Date\_ 20210219  
Time 10.01 h  
INSTRUM spect  
PROBHD Z113652\_0155 (  
PULPROG deptspl35  
TD 32768  
SOLVENT Acetone  
NS 3880  
DS 2  
SWH 22727.273 Hz  
FIDRES 1.387163 Hz  
AQ 0.7208960 sec  
RG 196.84  
DW 22.000 usec  
DE 6.50 usec  
TE 303.2 K  
CNST2 145.0000000  
D1 1.50000000 sec  
D2 0.00344828 sec  
D12 0.00002000 sec  
TD0 4096  
SFO1 125.7684784 MHz  
NUC1 13C  
P1 12.10 usec  
P13 2000.00 usec  
PLW0 0 W  
PLW1 79.43299866 W  
SPNAM[5] Crp60comp.4  
SFOAL5 0.500  
SPOFFS5 0 Hz  
SPW5 17.76899910 W  
SFO2 500.1320005 MHz  
NUC2 1H  
CPDPRG[2] waltz16  
P3 11.65 usec  
P4 23.30 usec  
PCPD2 80.00 usec  
PLW2 15.84899998 W  
PLW12 0.33610001 W

F2 - Processing parameters  
SI 65536  
SF 125.7576090 MHz  
WDW EM  
SSB 0  
LB 1.00 Hz  
GB 0  
PC 1.40

Figure S60. COSY-45 spectrum (500 MHz, acetone-d<sub>6</sub>) of **9**

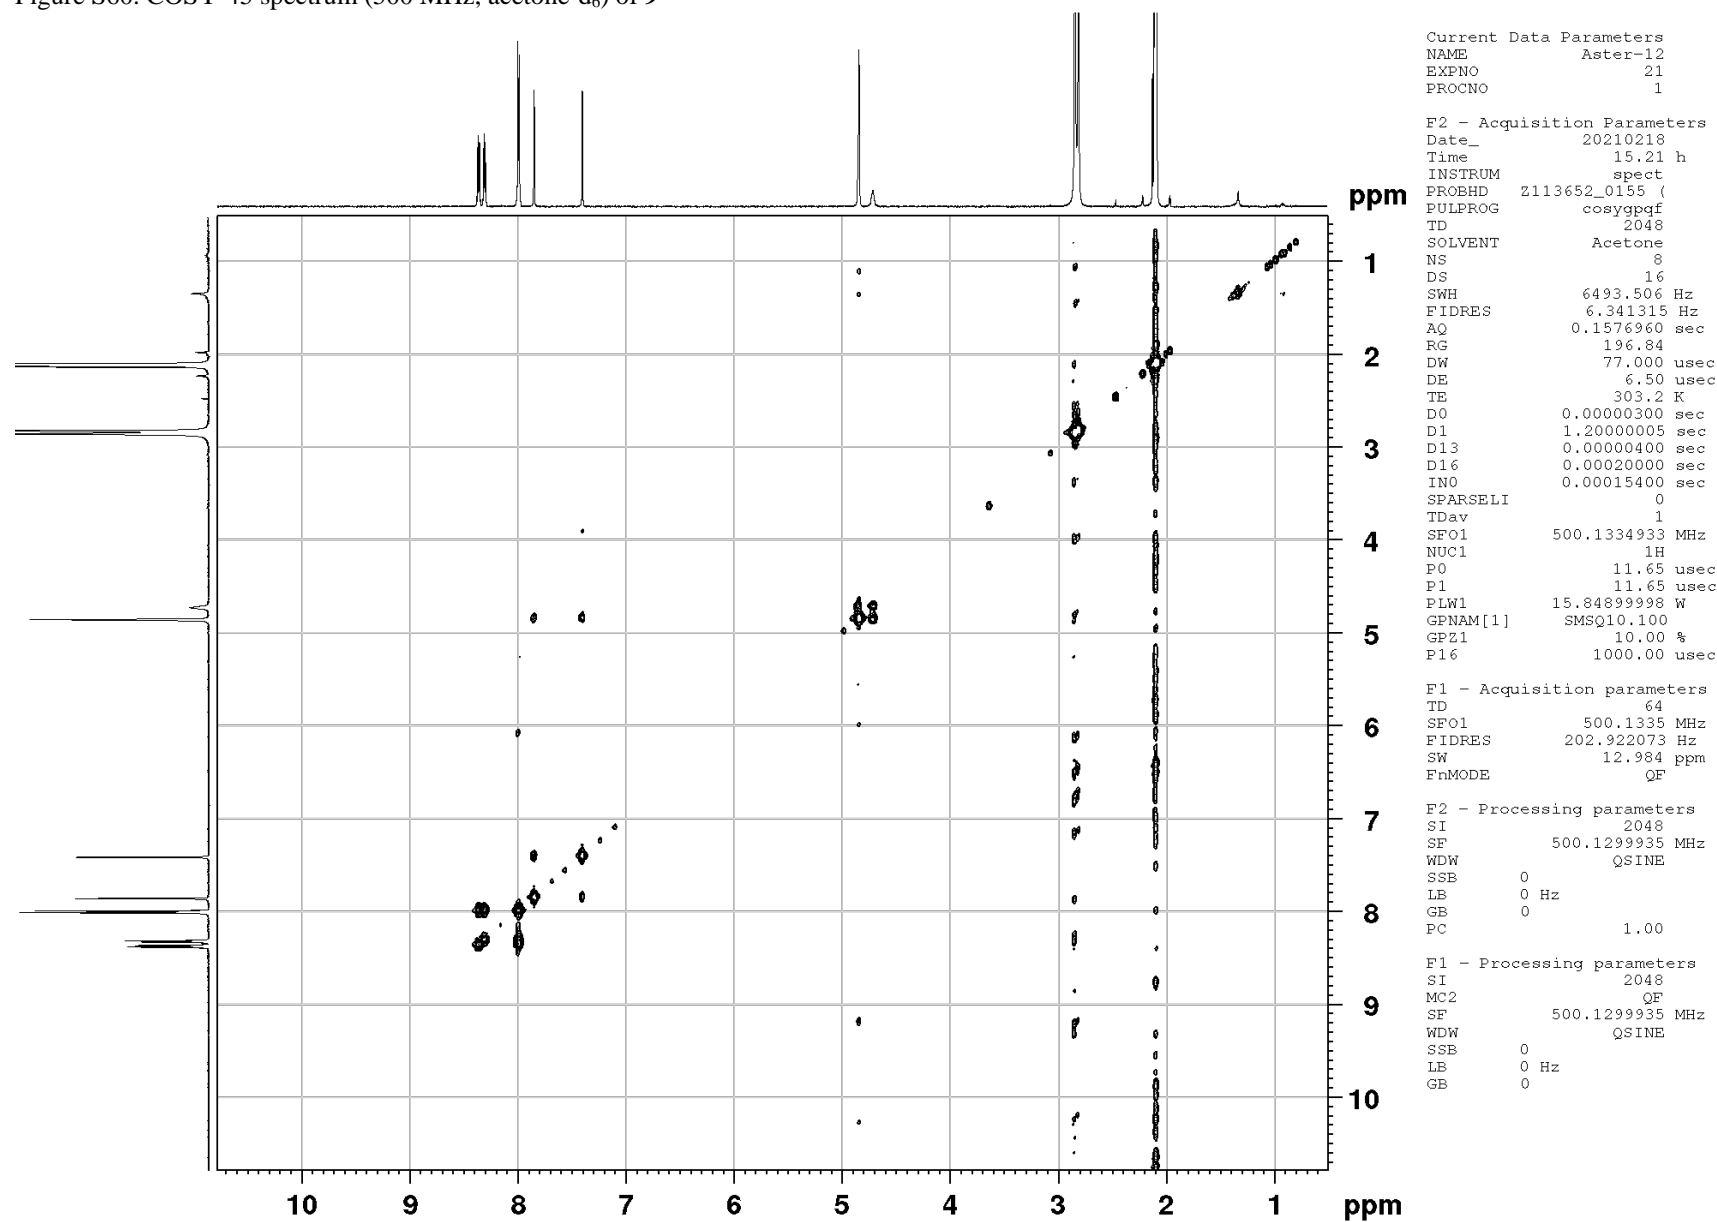

Figure S61. HSQC spectrum (500 MHz, acetone-d<sub>6</sub>) of **9**

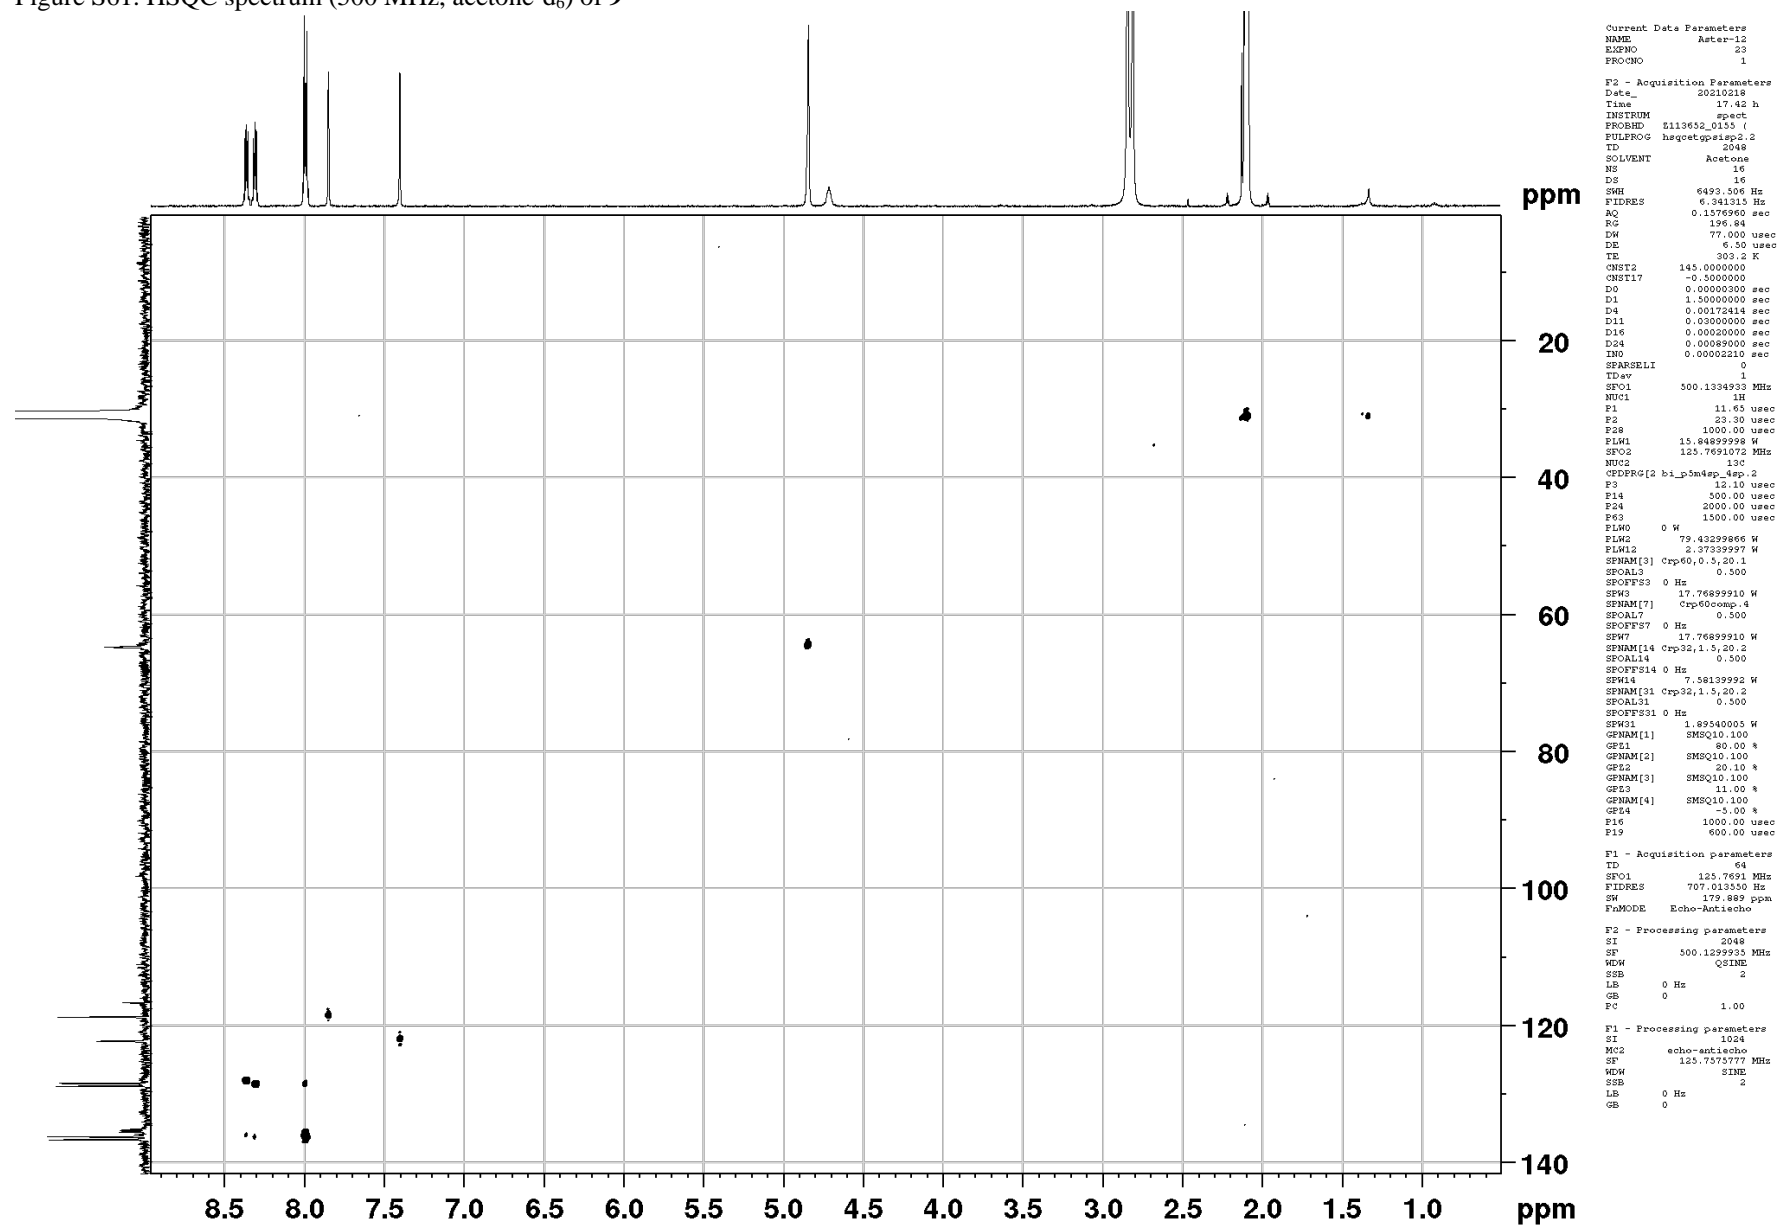

Figure S62. HMBC spectrum (500 MHz, acetone-d<sub>6</sub>) of **9**

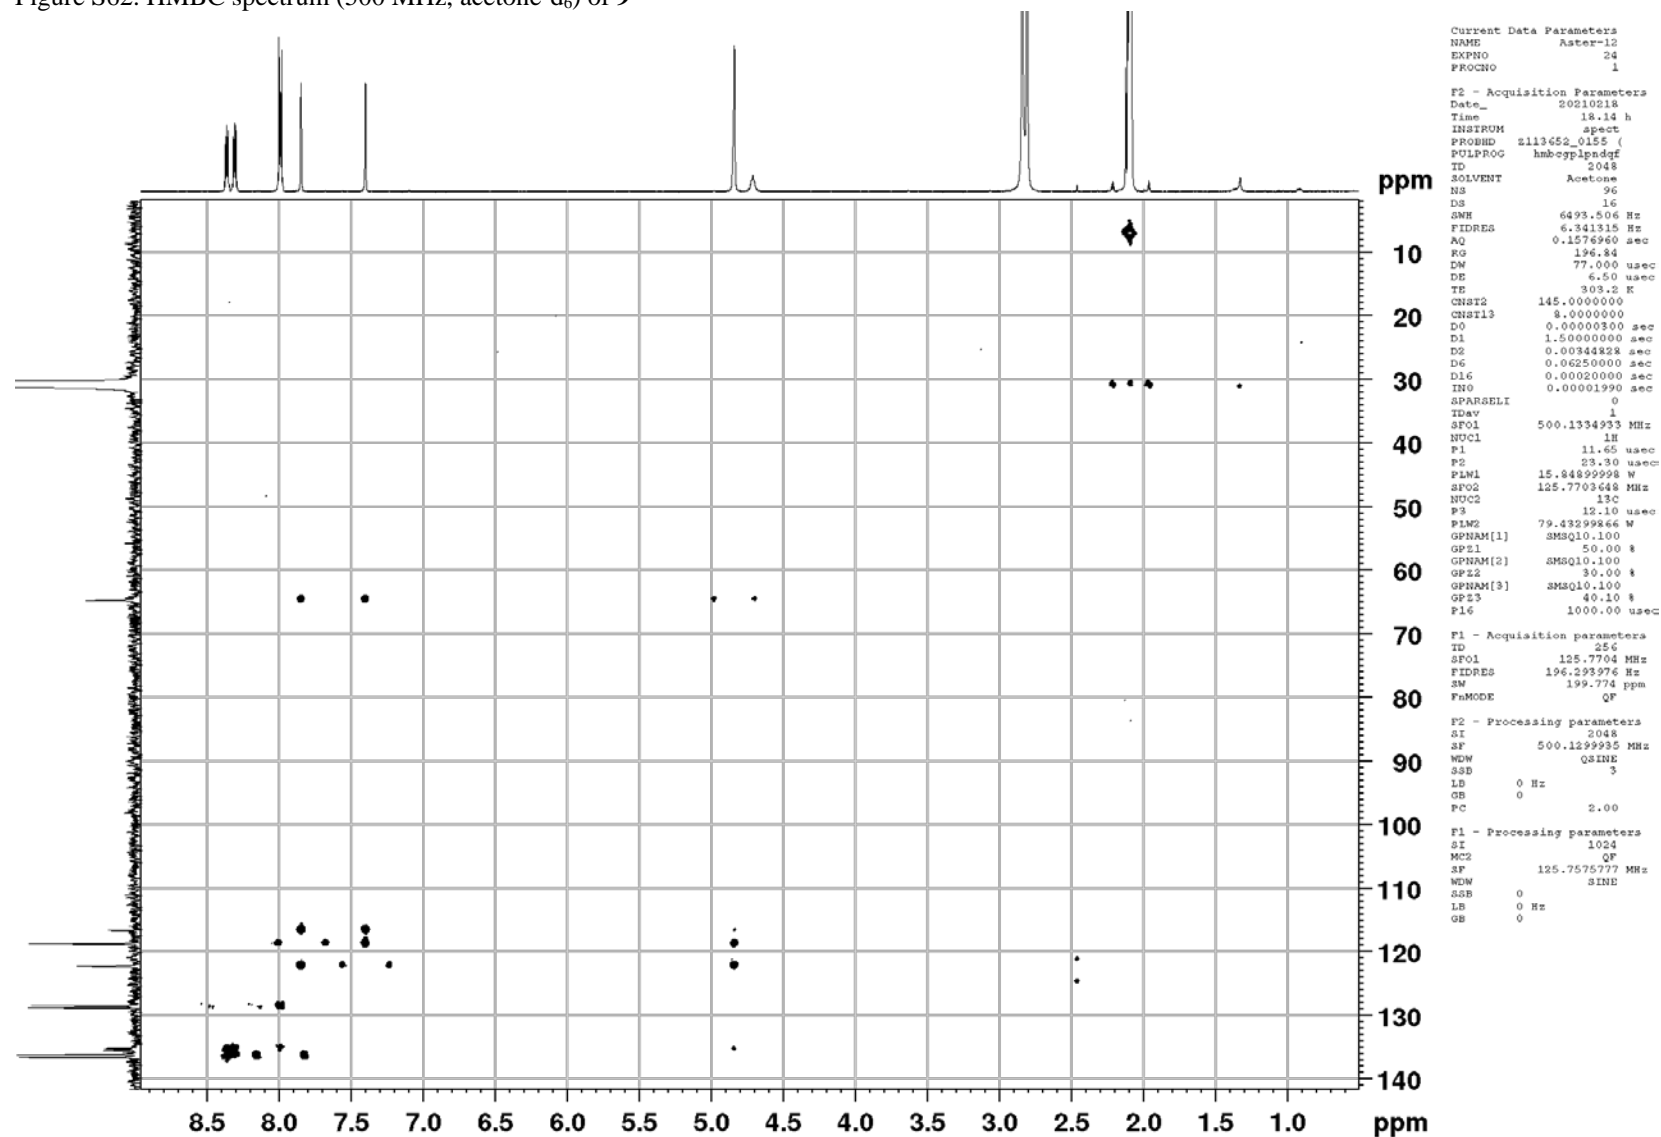



Figure S63. ROESY spectrum (500 MHz, acetone-d<sub>6</sub>) of **9**

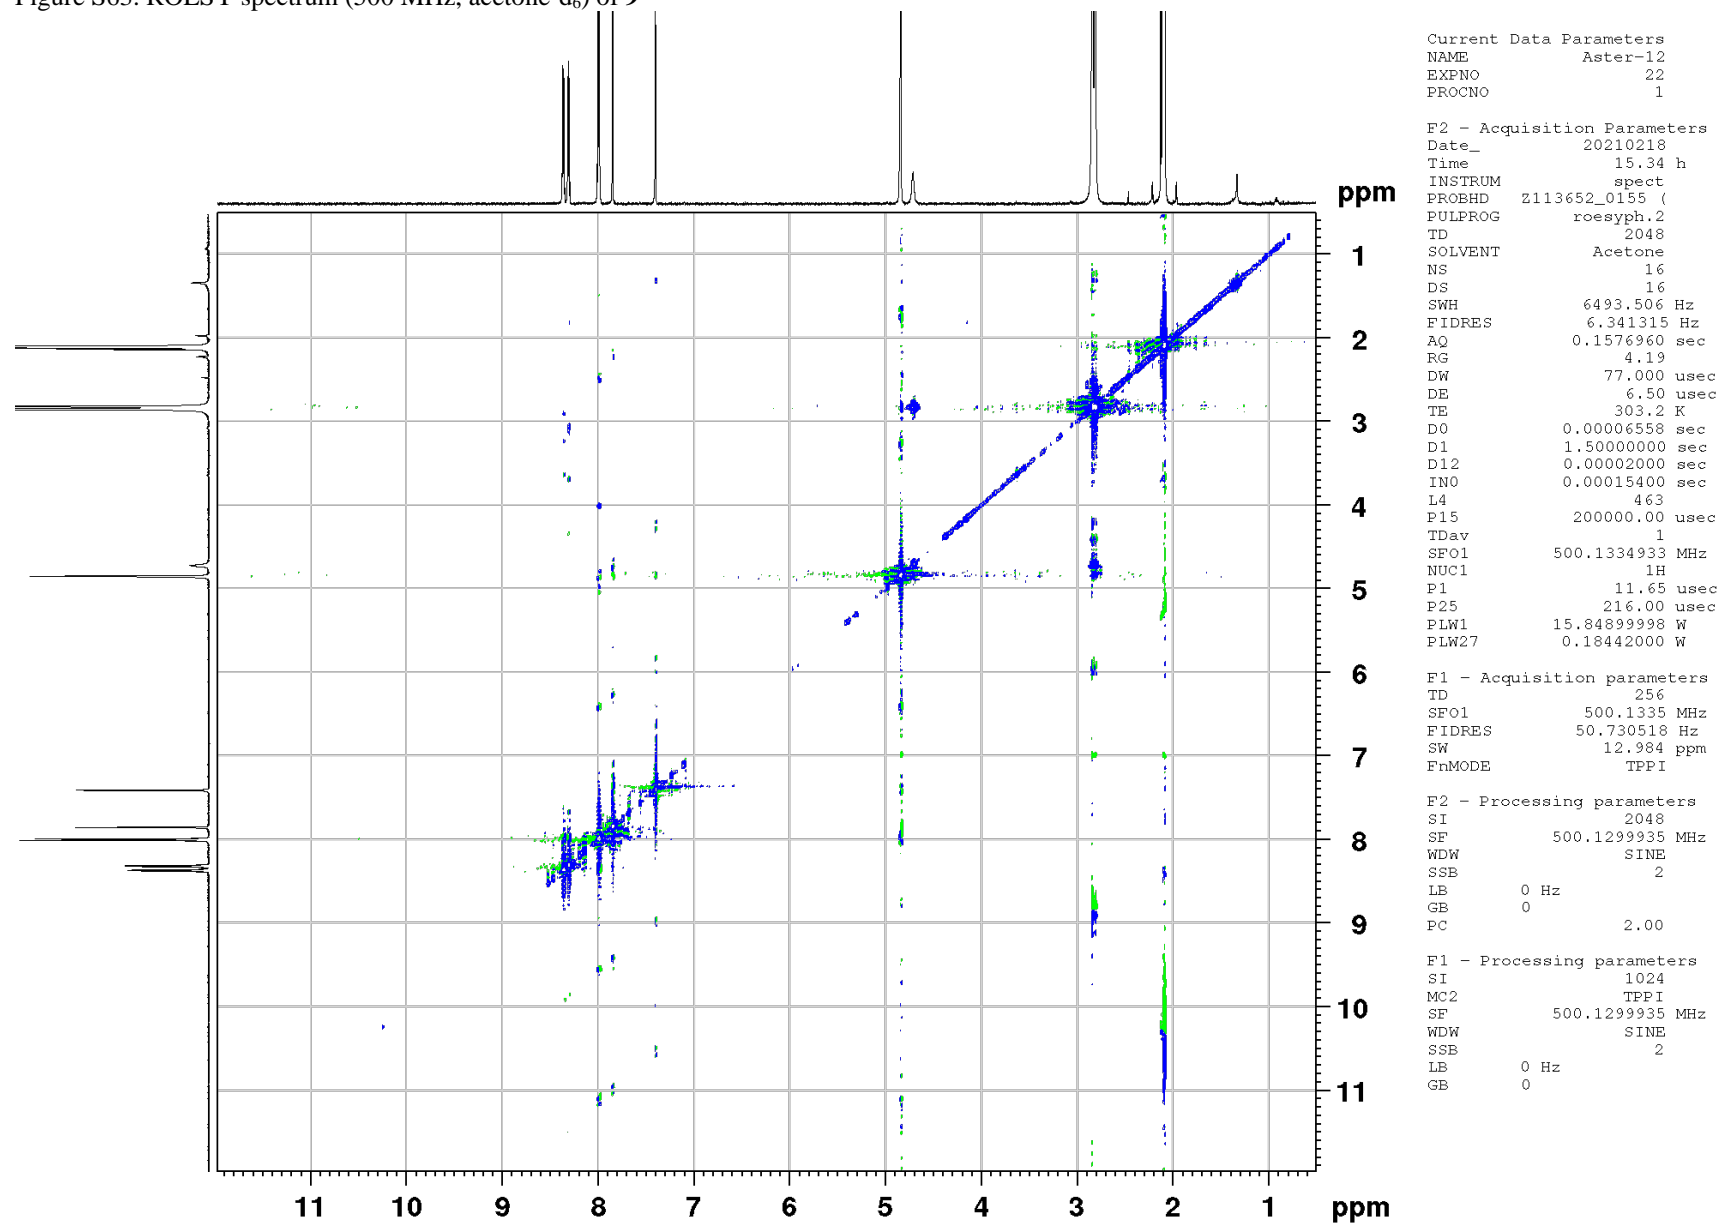

Figure S64. <sup>1</sup>H NMR spectrum (500 MHz, acetone-d<sub>6</sub>) of **10**

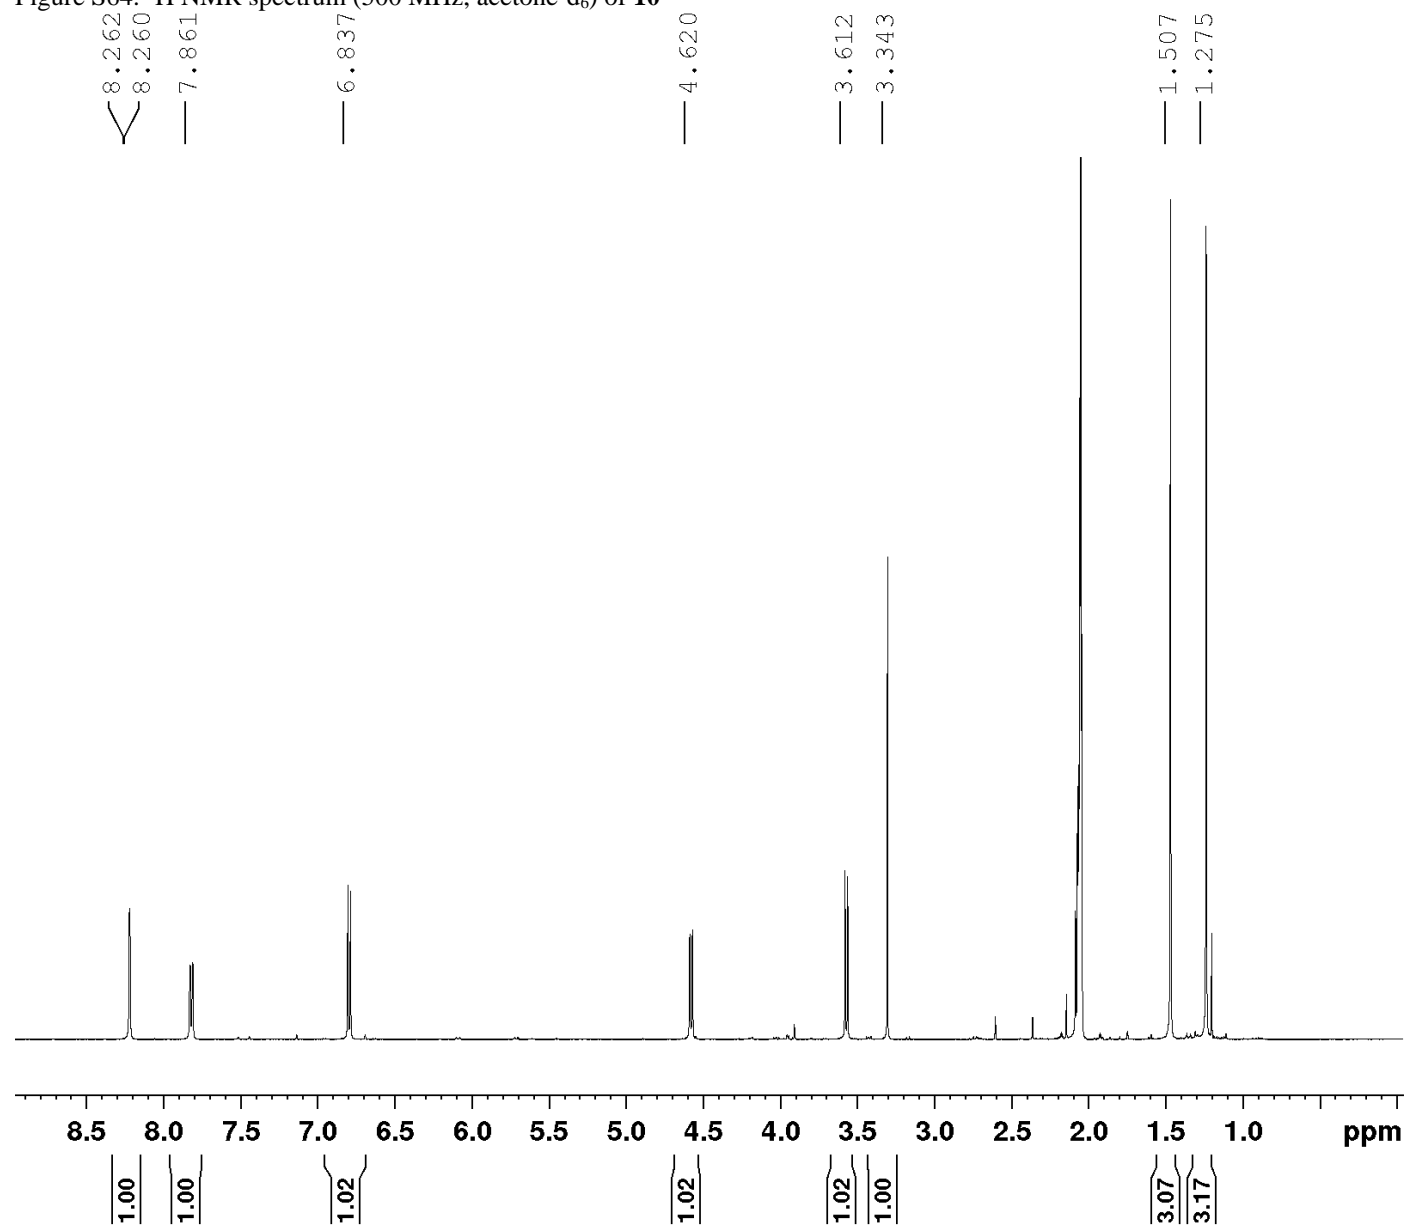

Current Data Parameters  
 NAME Aster-4  
 EXPNO 5  
 PROCNO 1

F2 - Acquisition Parameters  
 Date\_ 20210129  
 Time 12.57 h  
 INSTRUM spect  
 PROBHD Z113652\_0155 (   
 PULPROG zg30  
 TD 32768  
 SOLVENT Acetone  
 NS 1  
 DS 2  
 SWH 4504.504 Hz  
 FIDRES 0.274933 Hz  
 AQ 3.6372480 sec  
 RG 119.65  
 DW 111.000 usec  
 DE 6.50 usec  
 TE 303.1 K  
 D1 2.00000000 sec  
 TD0 1  
 SFO1 500.1322447 MHz  
 NUC1 1H  
 P0 3.88 usec  
 P1 11.65 usec  
 PLW1 15.84899998 W

F2 - Processing parameters  
 SI 65536  
 SF 500.1300134 MHz  
 WDW EM  
 SSB 0  
 LB 0.30 Hz  
 GB 0  
 PC 1.00

Figure S65.  $^{13}\text{C}$  NMR spectrum (125.77 MHz, acetone- $\text{d}_6$ ) of **10**

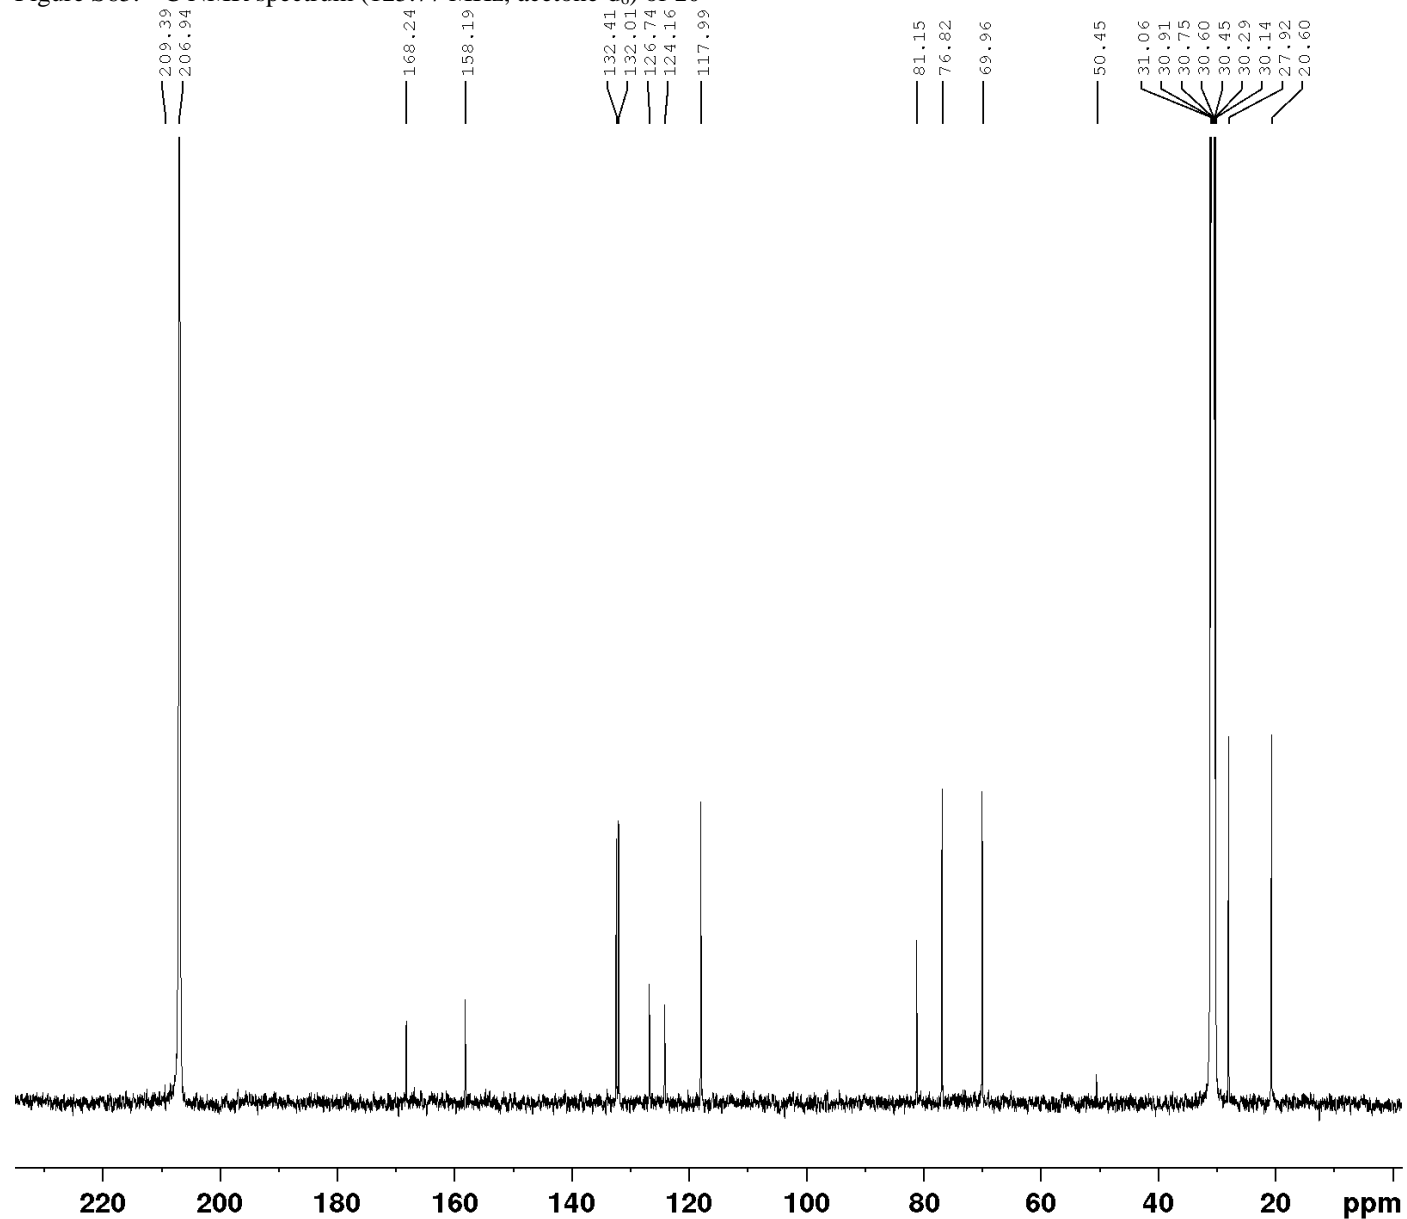

Current Data Parameters  
 NAME Aster-4  
 EXPNO 12  
 PROCNO 1

F2 - Acquisition Parameters  
 Date\_ 20210128  
 Time 15.05 h  
 INSTRUM spect  
 PROBHD Z113652\_0155 (   
 PULPROG zgpg30  
 TD 32768  
 SOLVENT Acetone  
 NS 1650  
 DS 4  
 SWH 29761.904 Hz  
 FIDRES 1.816522 Hz  
 AQ 0.5505024 sec  
 RG 196.84  
 DW 16.800 usec  
 DE 6.50 usec  
 TE 303.1 K  
 D1 1.50000000 sec  
 D11 0.03000000 sec  
 TD0 4096  
 SFO1 125.7722511 MHz  
 NUC1  $^{13}\text{C}$   
 P0 4.03 usec  
 P1 12.10 usec  
 PLW1 79.43299866 W  
 SFO2 500.1320005 MHz  
 NUC2  $^1\text{H}$   
 CPDPRG[2] waltz16  
 PCPD2 80.00 usec  
 PLW2 15.84899998 W  
 PLW12 0.33610001 W  
 PLW13 0.16906001 W

F2 - Processing parameters  
 SI 65536  
 SF 125.7575787 MHz  
 WDW EM  
 SSB 0  
 LB 5.00 Hz  
 GB 0  
 PC 1.30

Figure S66. DEPT-135 spectrum (125.77 MHz, acetone-d<sub>6</sub>) of **10**

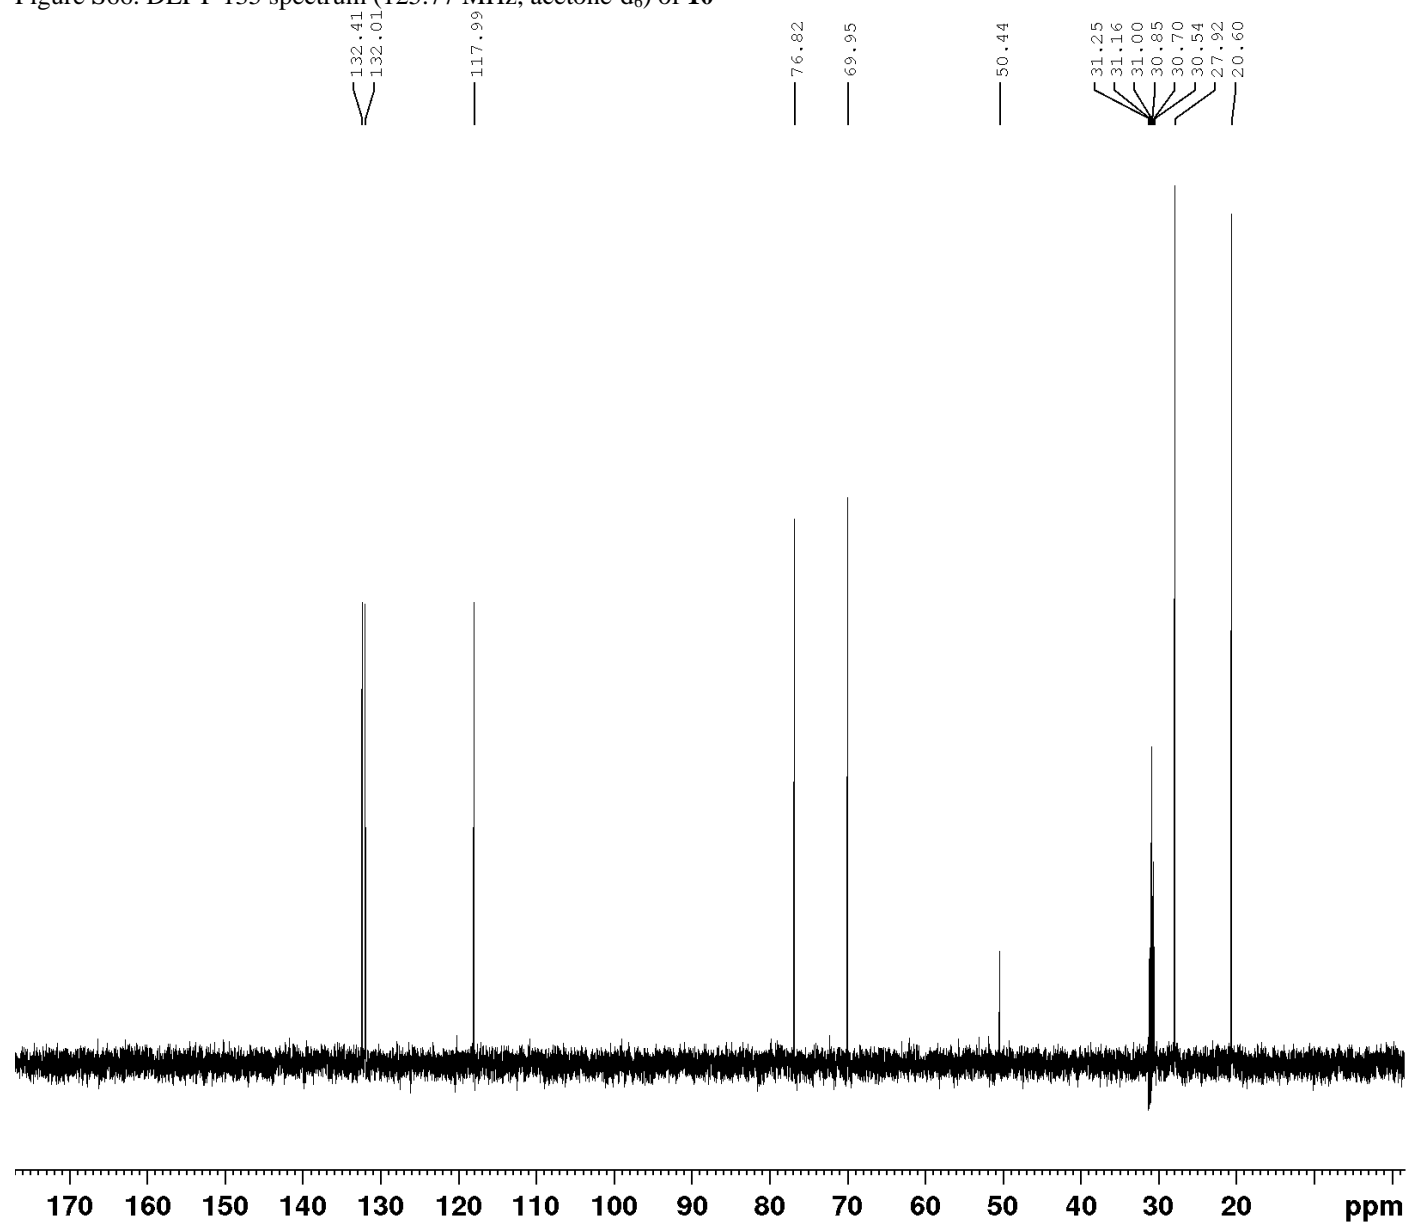

```

Current Data Parameters
NAME          Aster-4
EXPNO         13
PROCNO        1

F2 - Acquisition Parameters
Date_         20210128
Time          15.22 h
INSTRUM       spect
PROBHD        Z113652_0155 (
PULPROG       deptsp135
TD            32768
SOLVENT       Acetone
NS            335
DS            2
SWH           22727.273 Hz
FIDRES        1.387163 Hz
AQ            0.7208960 sec
RG            196.84
DW            22.000 usec
DE            6.50 usec
TE            303.1 K
CNST2         145.0000000
D1            1.50000000 sec
D2            0.00344828 sec
D12           0.00002000 sec
TD0           4096
SFO1          125.7684784 MHz
NUC1          13C
P1            12.10 usec
P13           2000.00 usec
PLW0          0 W
PLW1          79.43299866 W
SPNAM[5]      Crp60comp.4
SFOAL5        0.500
SPOFFS5       0 Hz
SPW5          17.76899910 W
SFO2          500.1320005 MHz
NUC2          1H
CPDPRG[2]     waltz16
P3            11.65 usec
P4            23.30 usec
PCPD2         80.00 usec
PLW2          15.84899998 W
PLW12         0.33610001 W

F2 - Processing parameters
SI            65536
SF            125.7575786 MHz
WDW           EM
SSB           0
LB            1.00 Hz
GB            0
PC            1.40
    
```



Figure S68. HSQC spectrum (500 MHz, acetone-d<sub>6</sub>) of **10**

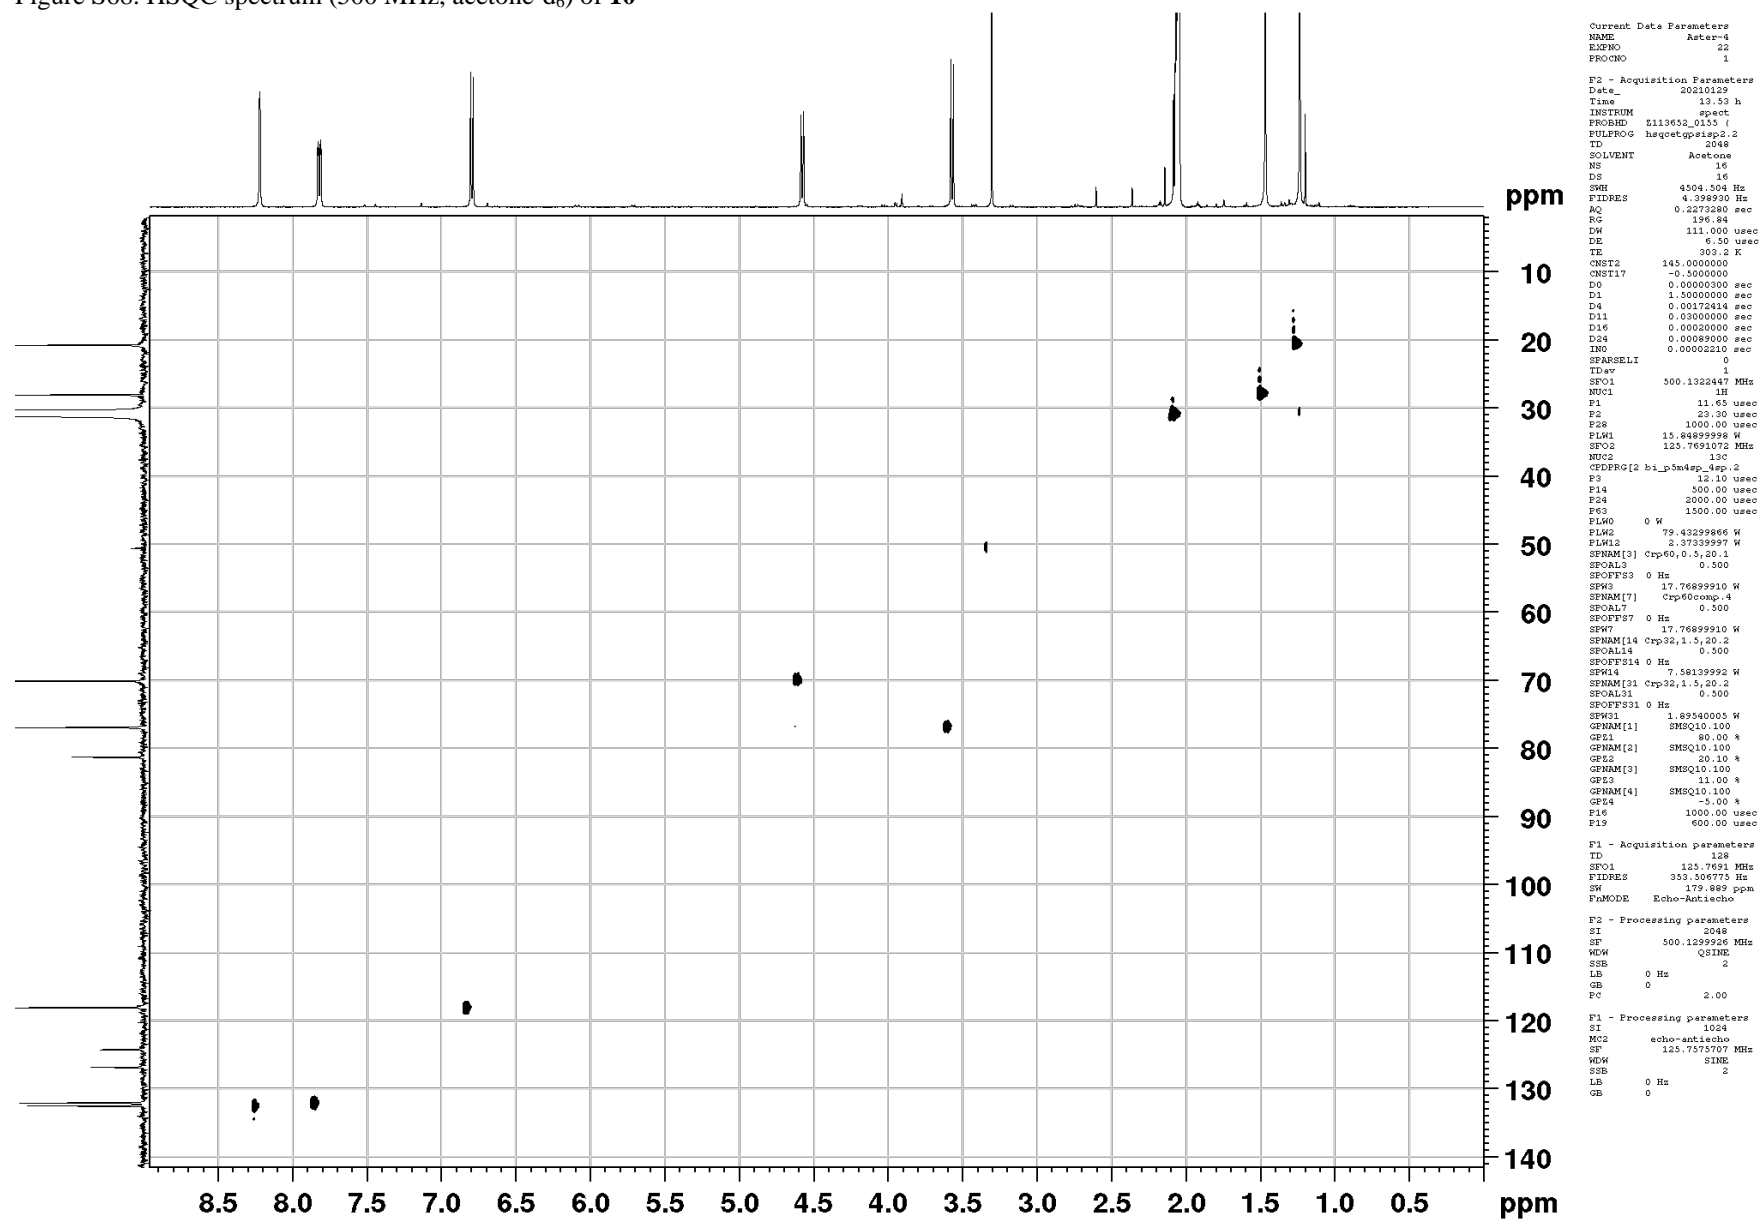

Figure S69. HMBC spectrum (500 MHz, acetone-d<sub>6</sub>) of **10**

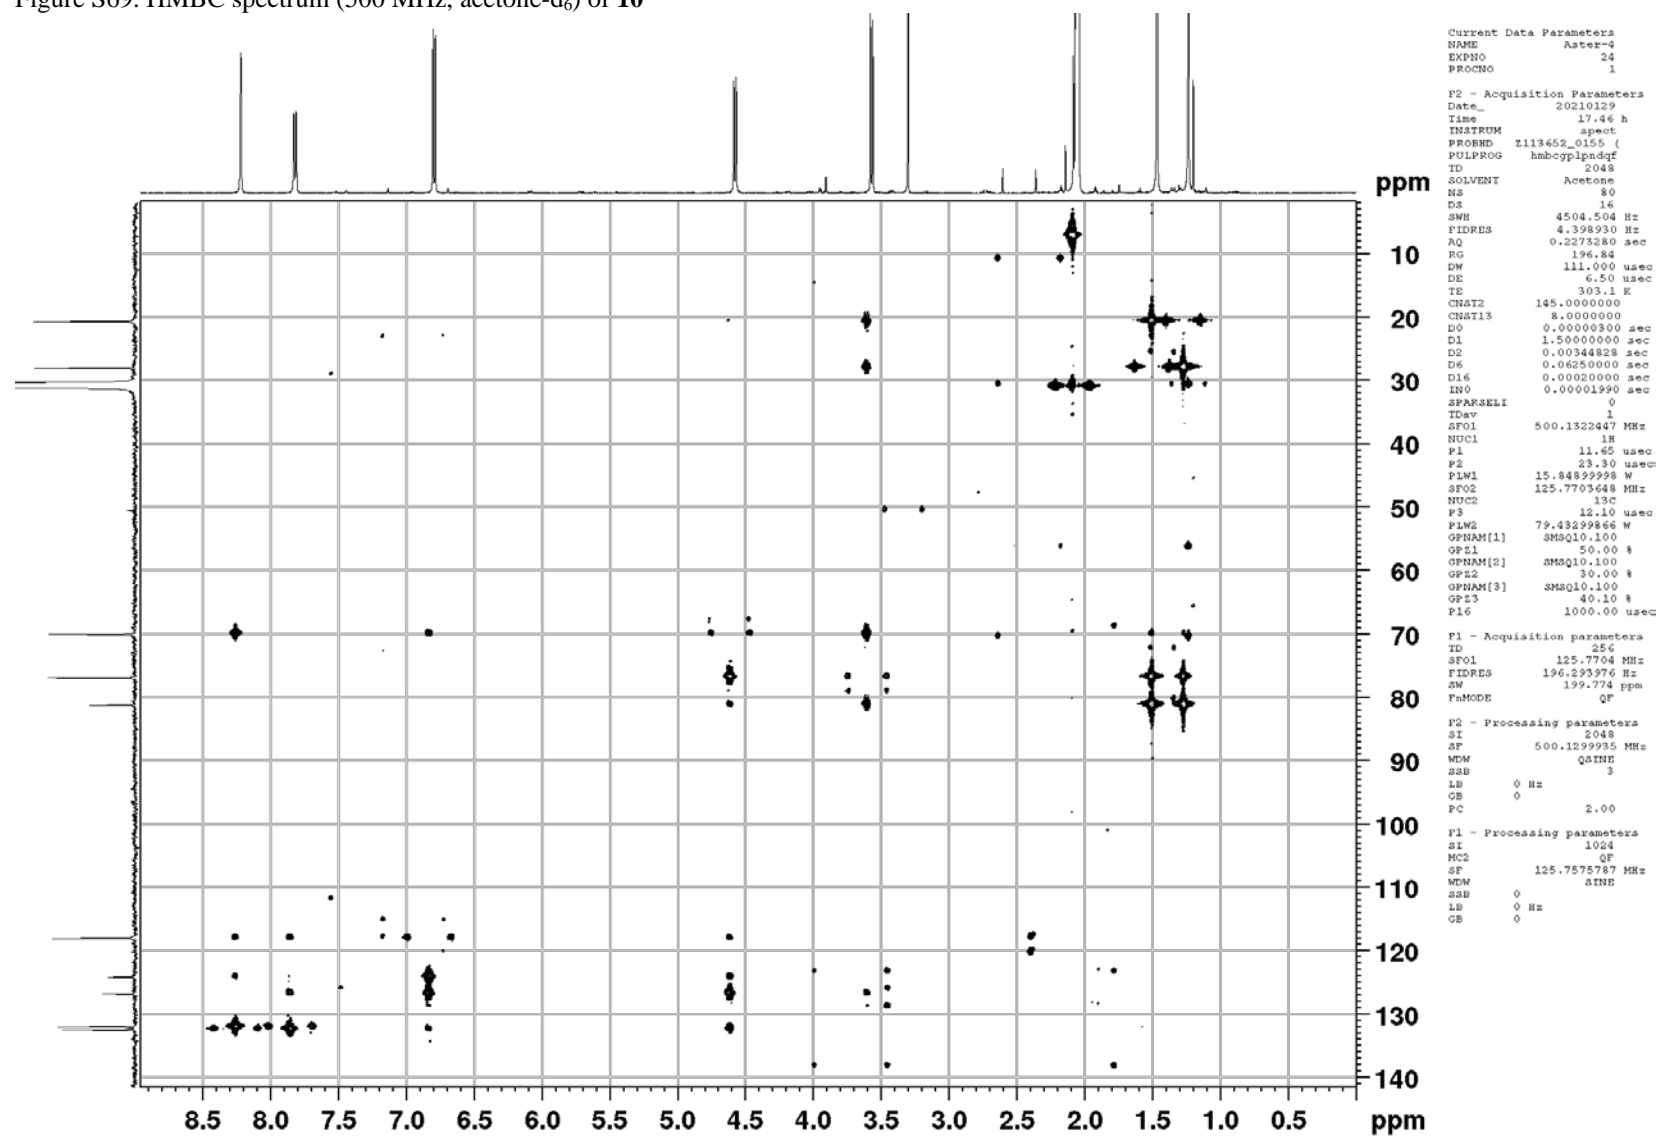

Figure S70. ROESY spectrum (500 MHz, acetone-d<sub>6</sub>) of **10**

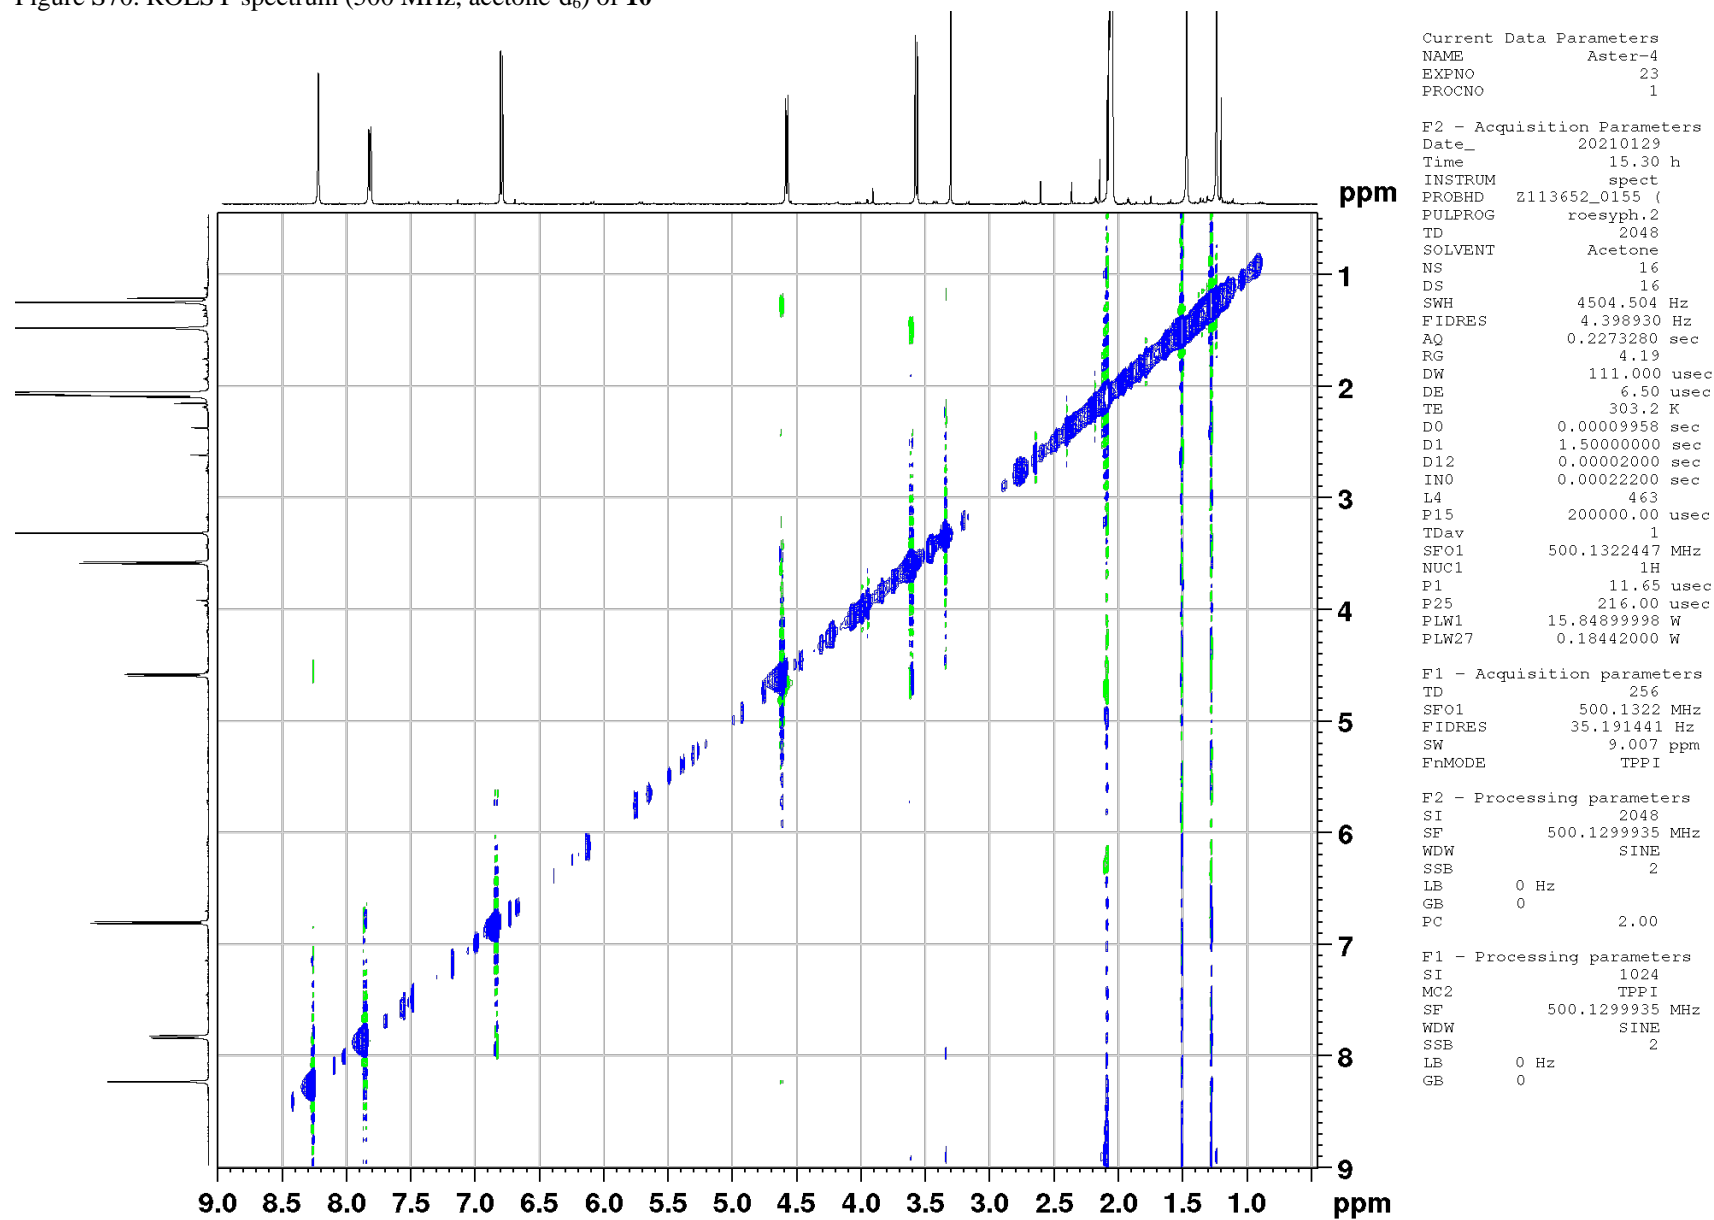



Figure S71. <sup>1</sup>H NMR spectrum (700 MHz, acetone-d<sub>6</sub>) of **11**

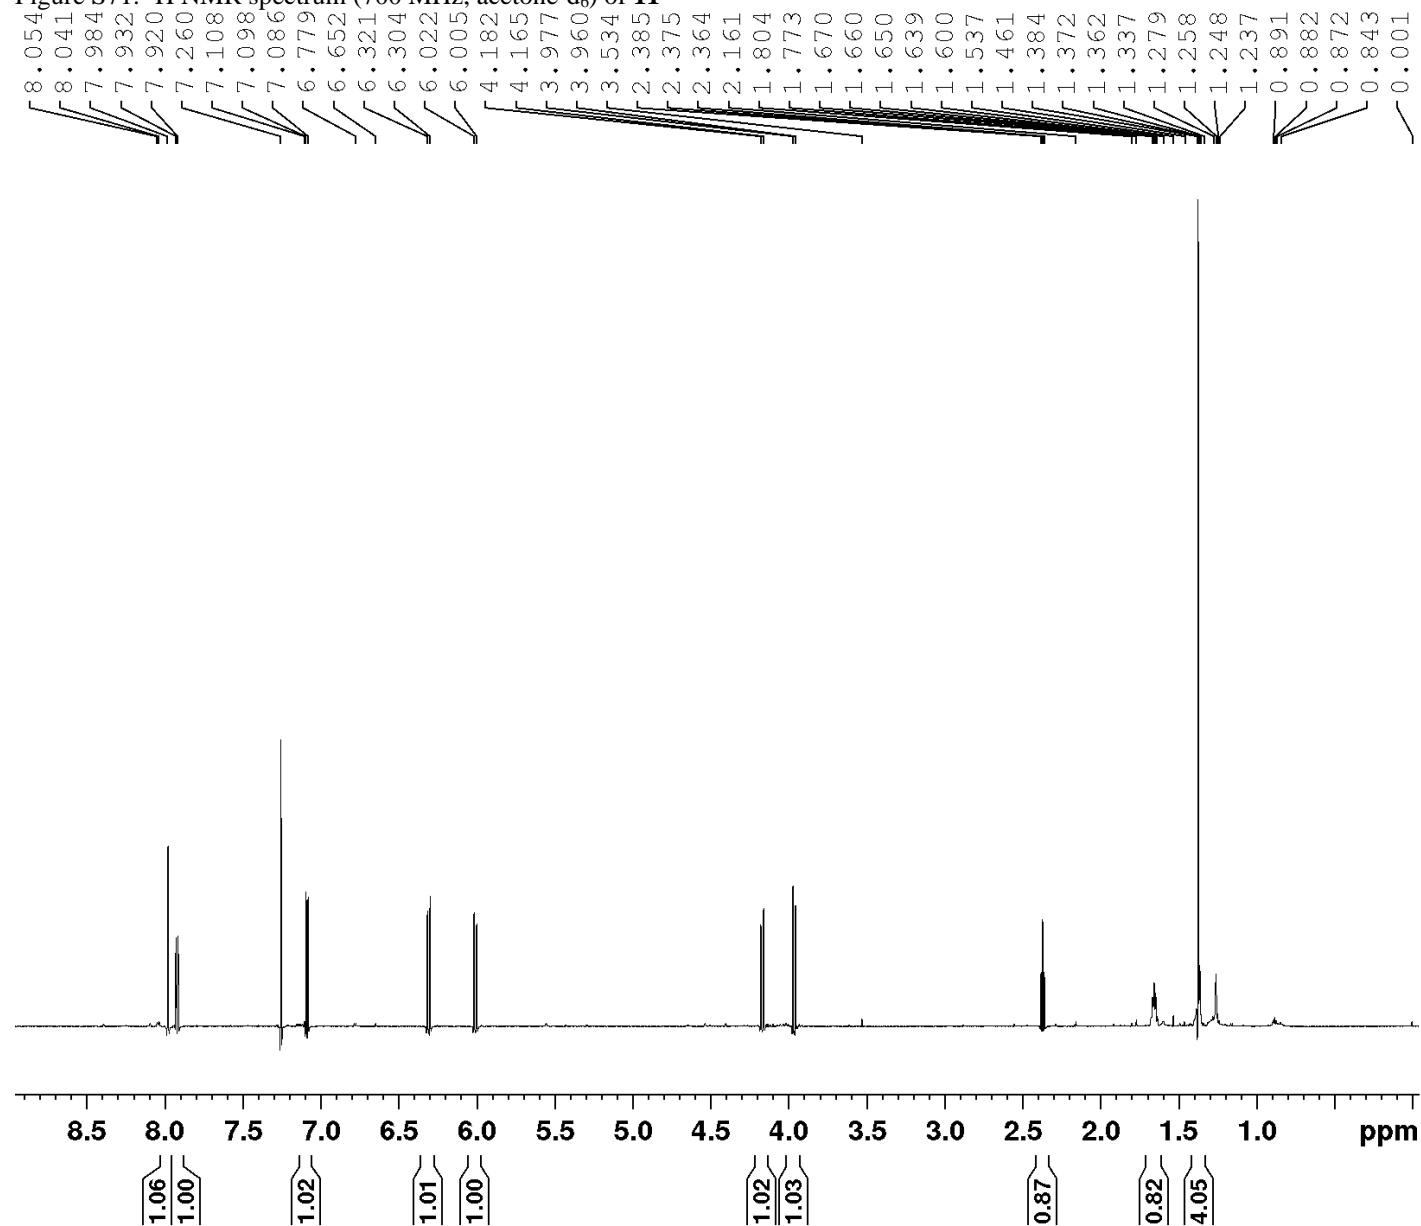

```

Current Data Parameters
NAME          Aster-38
EXPNO         1
PROCNO        1

F2 - Acquisition Parameters
Date_         20210501
Time          16.49 h
INSTRUM       spect
PROBHD        Z112726_0001 (
PULPROG       zg
TD            32768
SOLVENT       CDC13
NS            1
DS            0
SWH           11160.714 Hz
FIDRES        0.681196 Hz
AQ            1.4680064 sec
RG            181
DW            44.800 usec
DE            6.50 usec
TE            303.0 K
D1            0 sec
TD0           1
SFO1          700.0053900 MHz
NUC1          1H
P1            12.60 usec
PLW1          39.81100082 W

F2 - Processing parameters
SI            32768
SF            700.0000165 MHz
WDW           GM
SSB           0
LB            -2.50 Hz
GB            0.08
PC            4.00
  
```

Figure S72.  $^{13}\text{C}$  NMR spectrum (176.04 MHz, acetone- $\text{d}_6$ ) of **11**

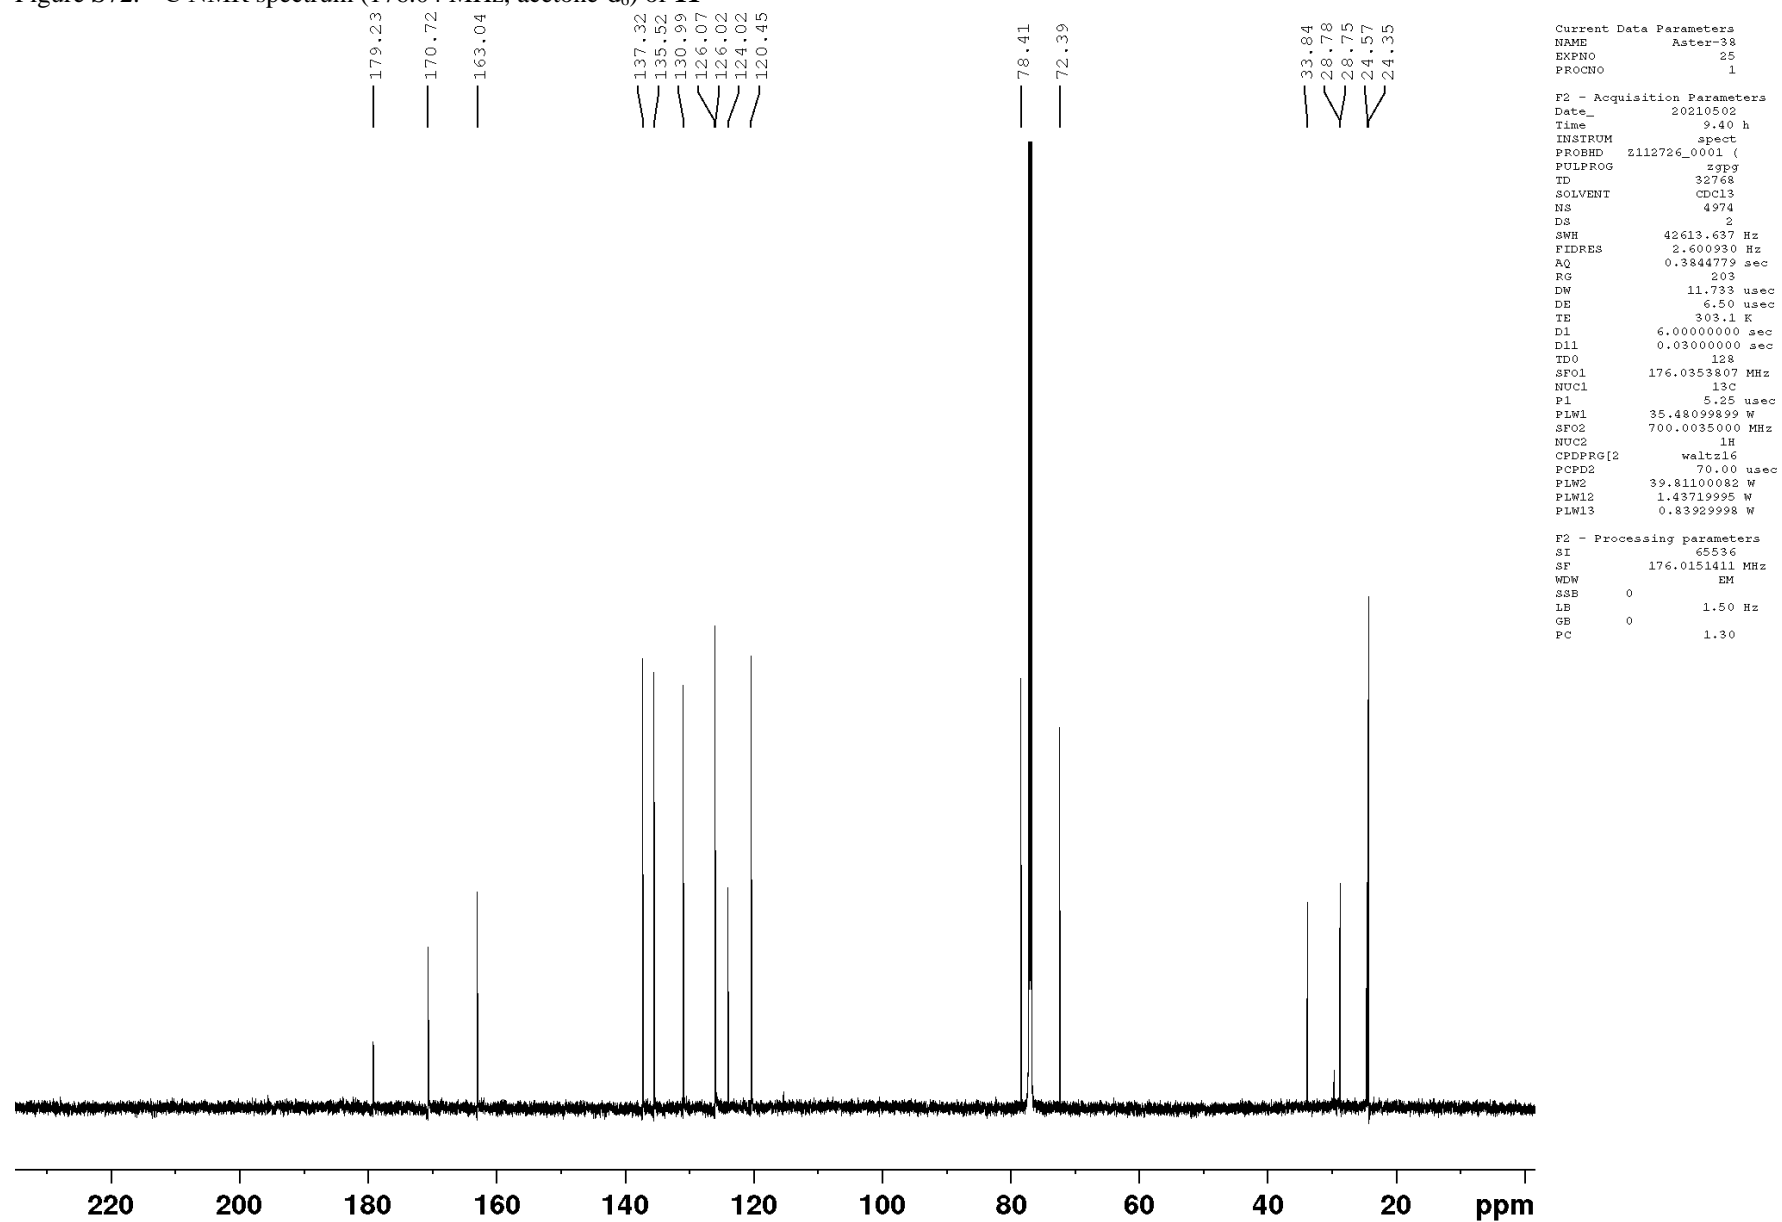

Figure S73. DEPT-135 NMR spectrum (176.04 MHz, acetone-d<sub>6</sub>) of **11**

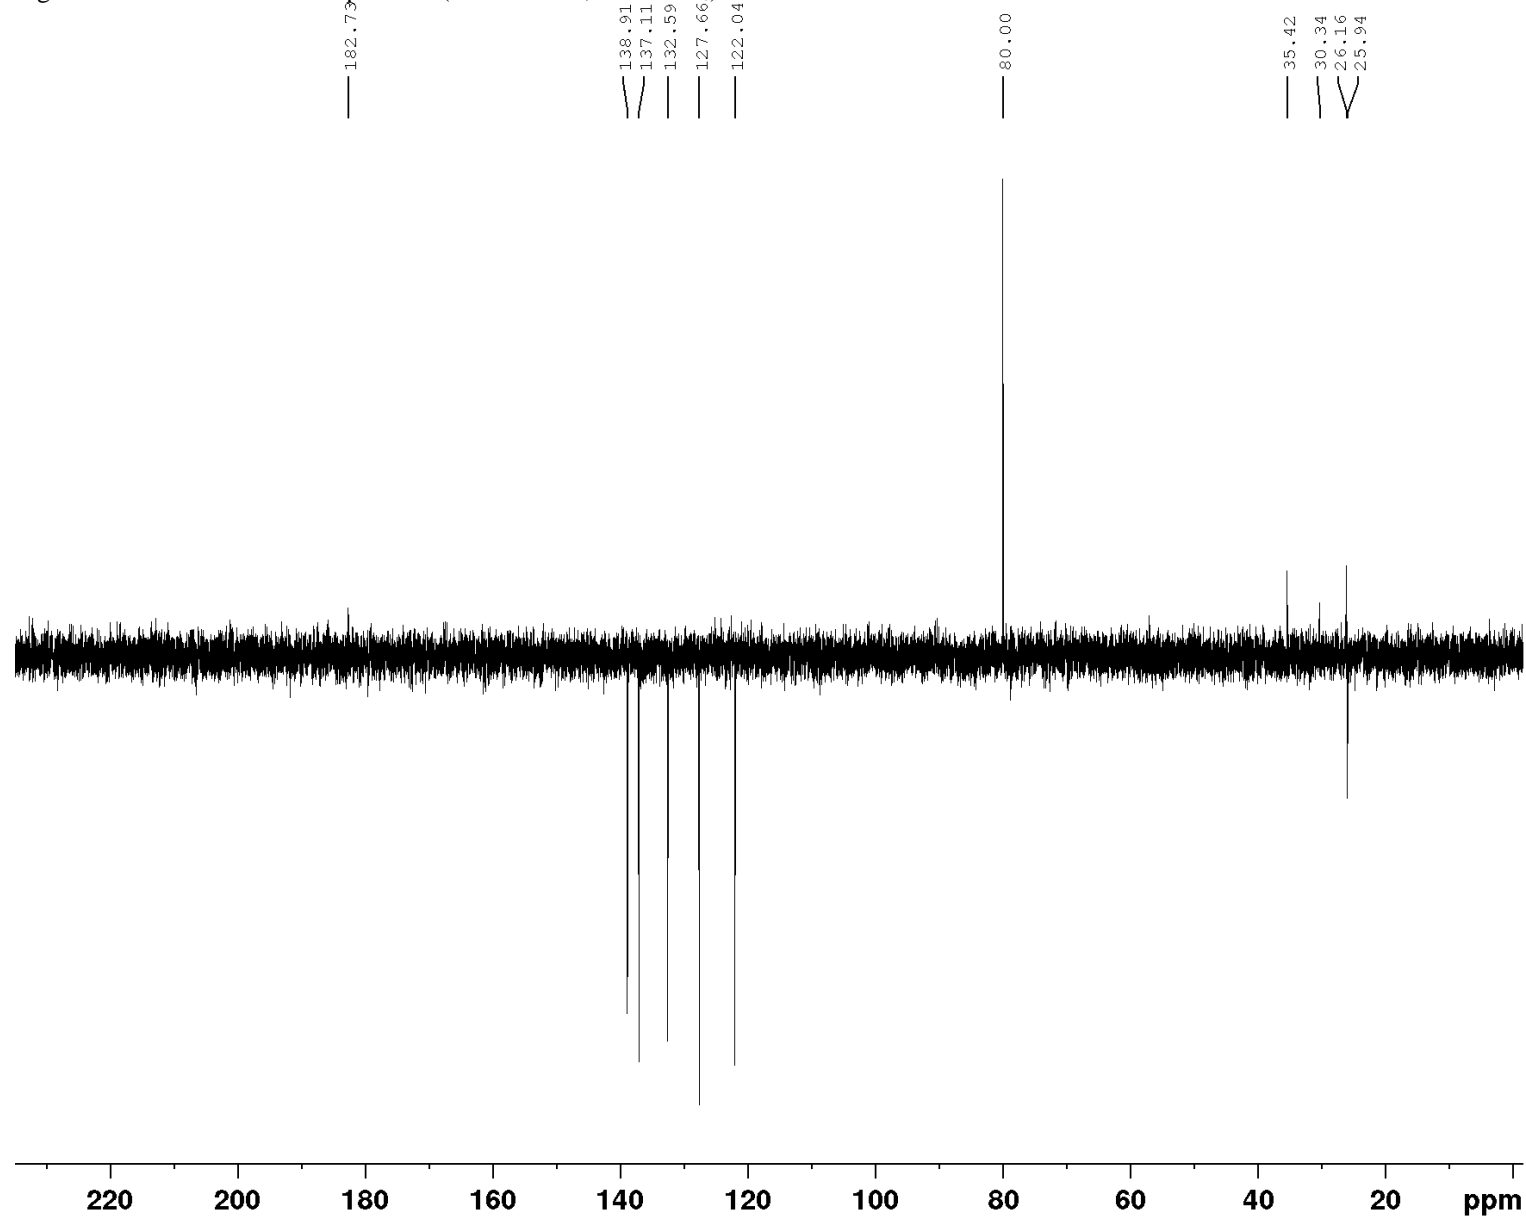

Current Data Parameters  
NAME Aster-38  
EXPNO 75  
PROCNO 1

F2 - Acquisition Parameters  
Date\_ 20210501  
Time 17.05 h  
INSTRUM spect  
PROBHD Z112726\_0001 (   
PULPROG dept135  
TD 32768  
SOLVENT CDCl3  
NS 205  
DS 32  
SWH 42613.637 Hz  
FIDRES 2.600930 Hz  
AQ 0.3844779 sec  
RG 203  
DW 11.733 usec  
DE 6.50 usec  
TE 303.1 K  
CNST2 145.0000000  
D1 2.00000000 sec  
D2 0.00344828 sec  
D12 0.00002000 sec  
TD0 128  
SFO1 176.0353807 MHz  
NUC1 13C  
P1 10.50 usec  
P2 21.00 usec  
PLW1 35.48099899 W  
SFO2 700.0035000 MHz  
NUC2 1H  
CPDPRG2 waltz16  
P3 13.30 usec  
P4 26.60 usec  
PCPD2 70.00 usec  
PLW2 39.81100082 W  
PLW12 1.43719995 W

F2 - Processing parameters  
SI 65536  
SF 176.0148619 MHz  
WDW EM  
SSB 0  
LB 1.50 Hz  
GB 0  
PC 1.30

Figure S74. COSY-45 spectrum (700 MHz, acetone-d<sub>6</sub>) of **11**

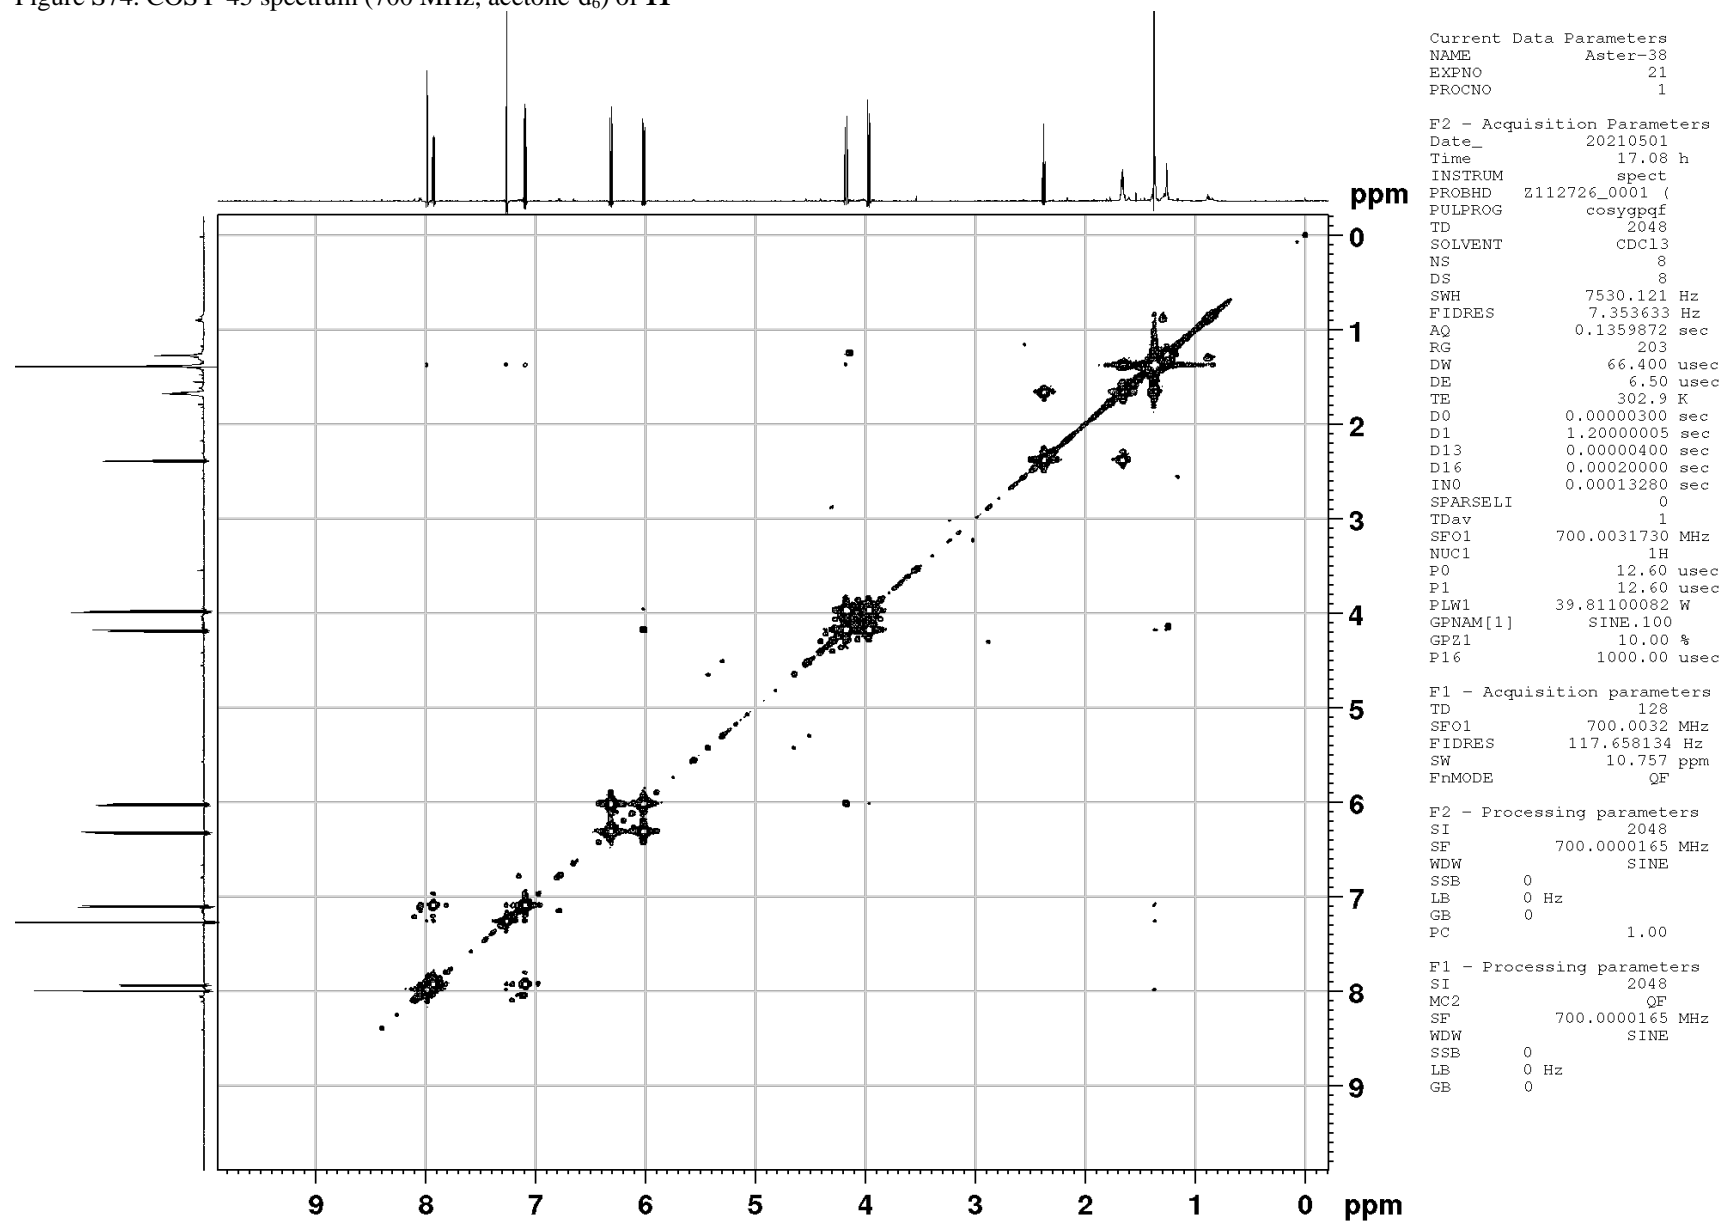

Figure S75. HSQC spectrum (700 MHz, acetone-d<sub>6</sub>) of **11**

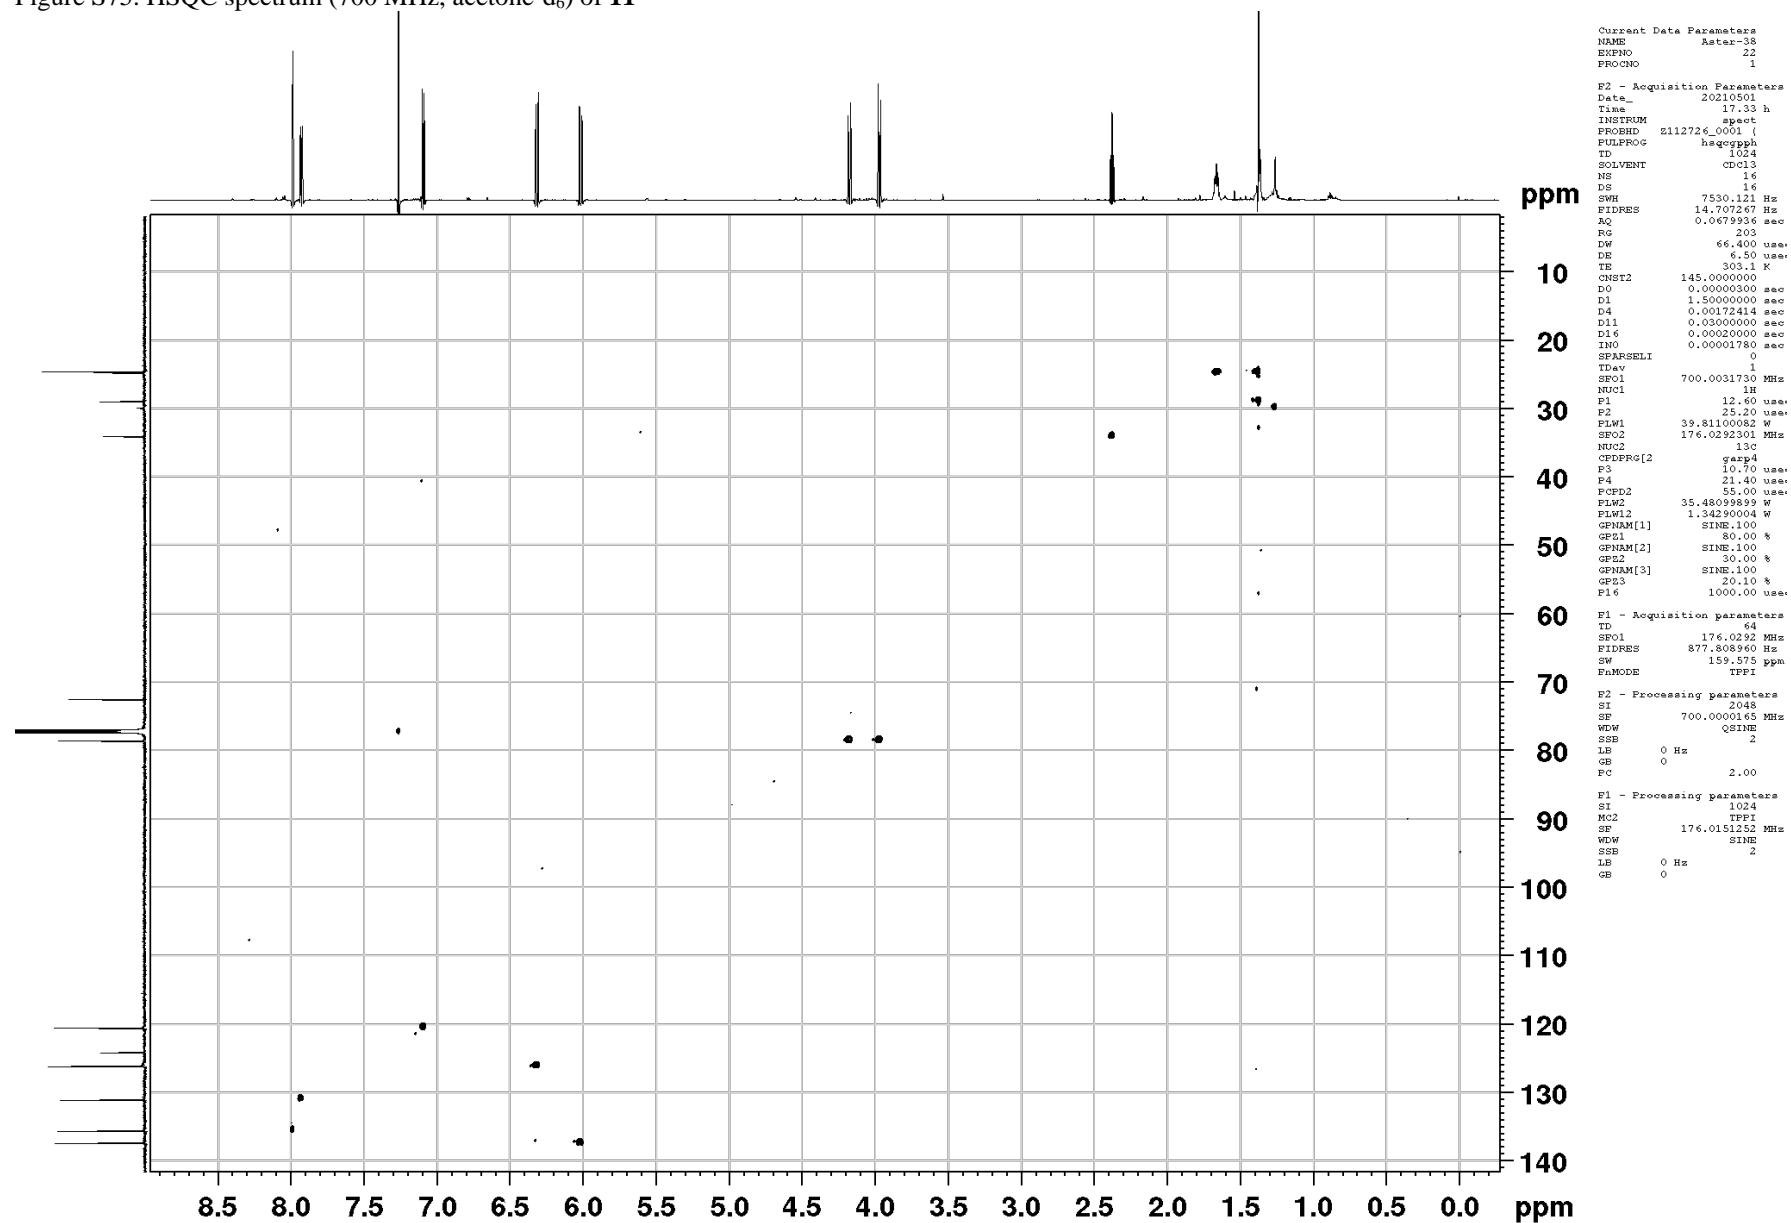

Figure S76. HMBC spectrum (700 MHz, acetone-d<sub>6</sub>) of **11**

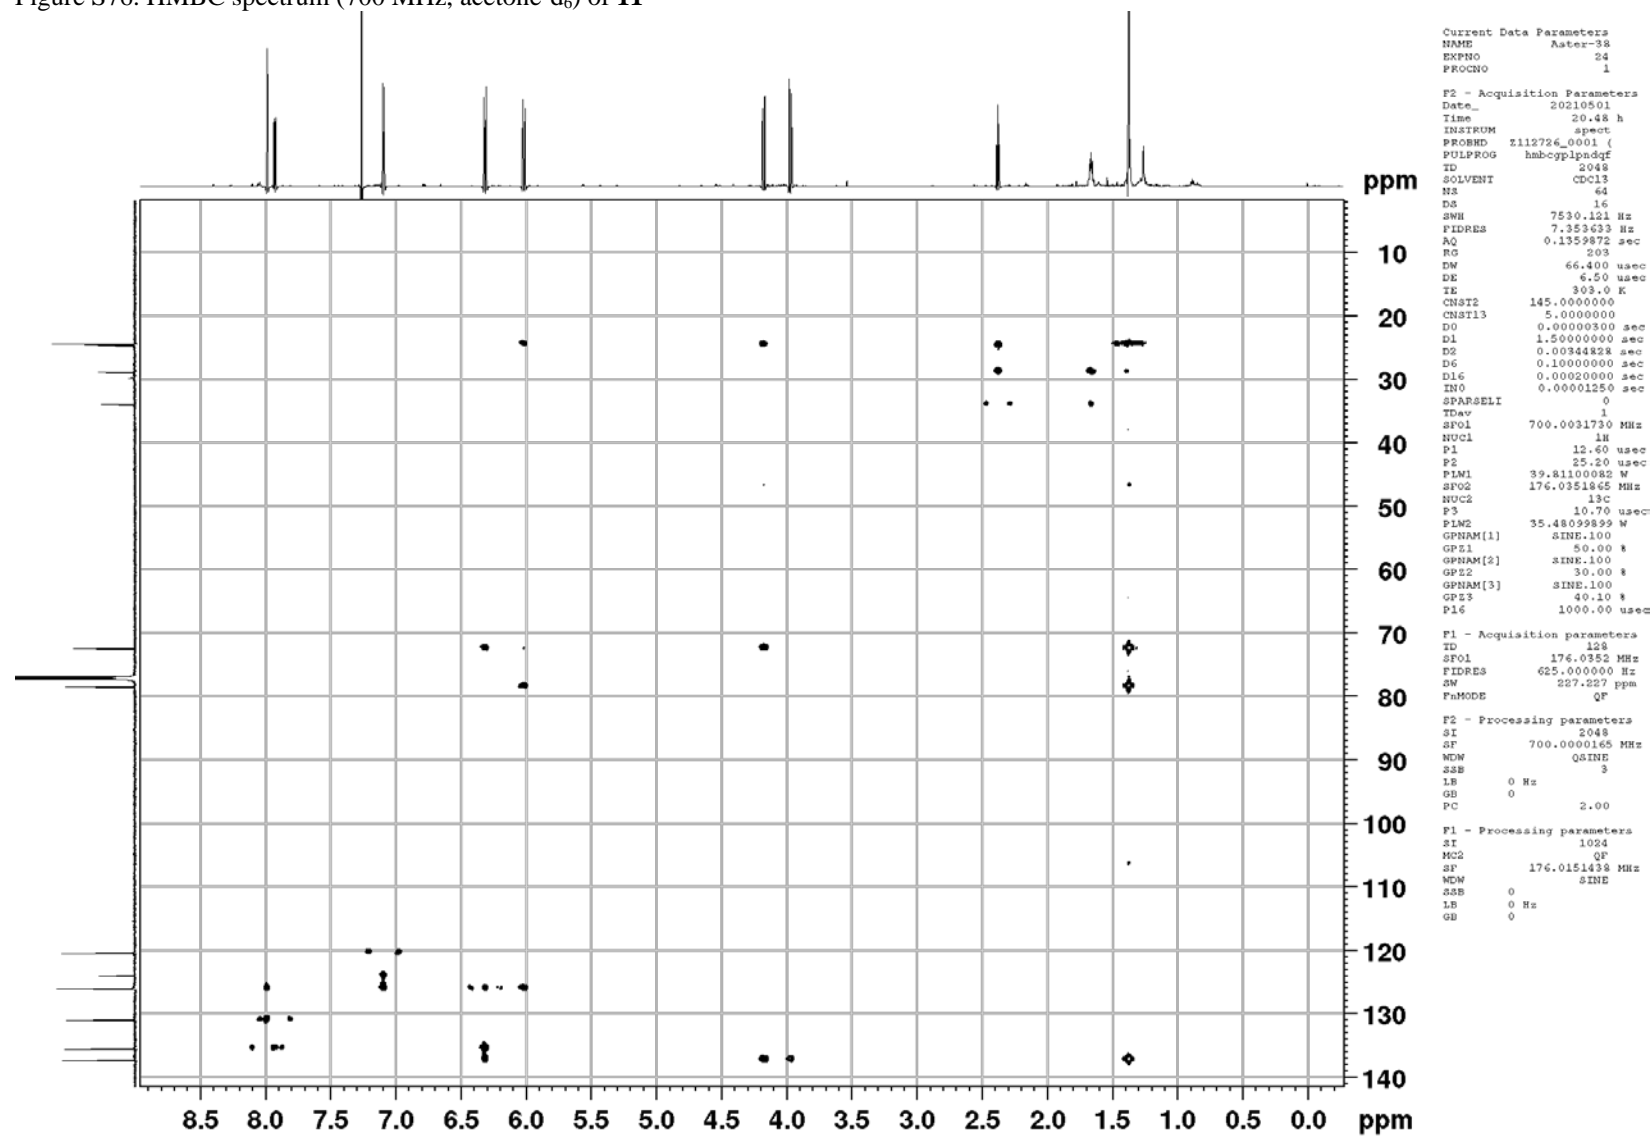

Figure S77. ROESY spectrum (700 MHz, acetone-d<sub>6</sub>) of **11**

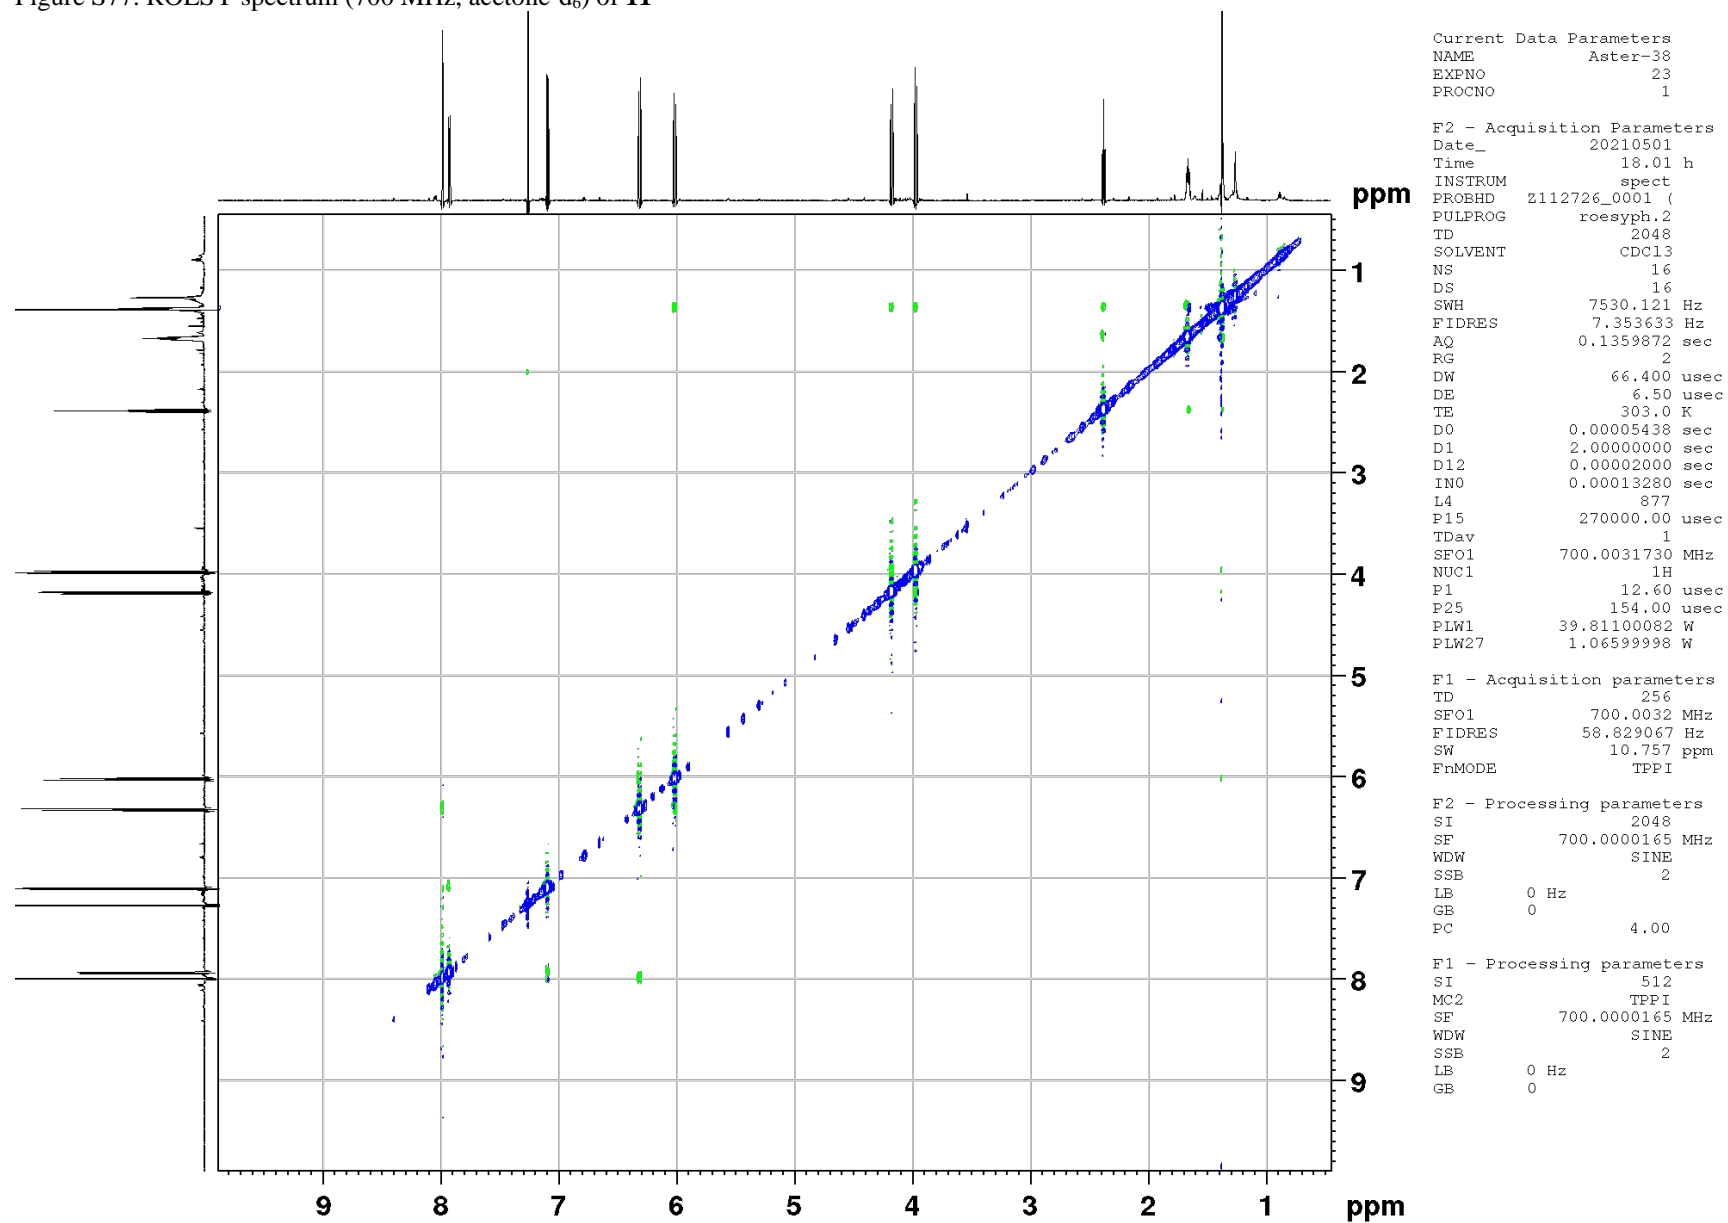

Figure S78. <sup>1</sup>H NMR spectrum (500 MHz, acetone-d<sub>6</sub>) of **12**

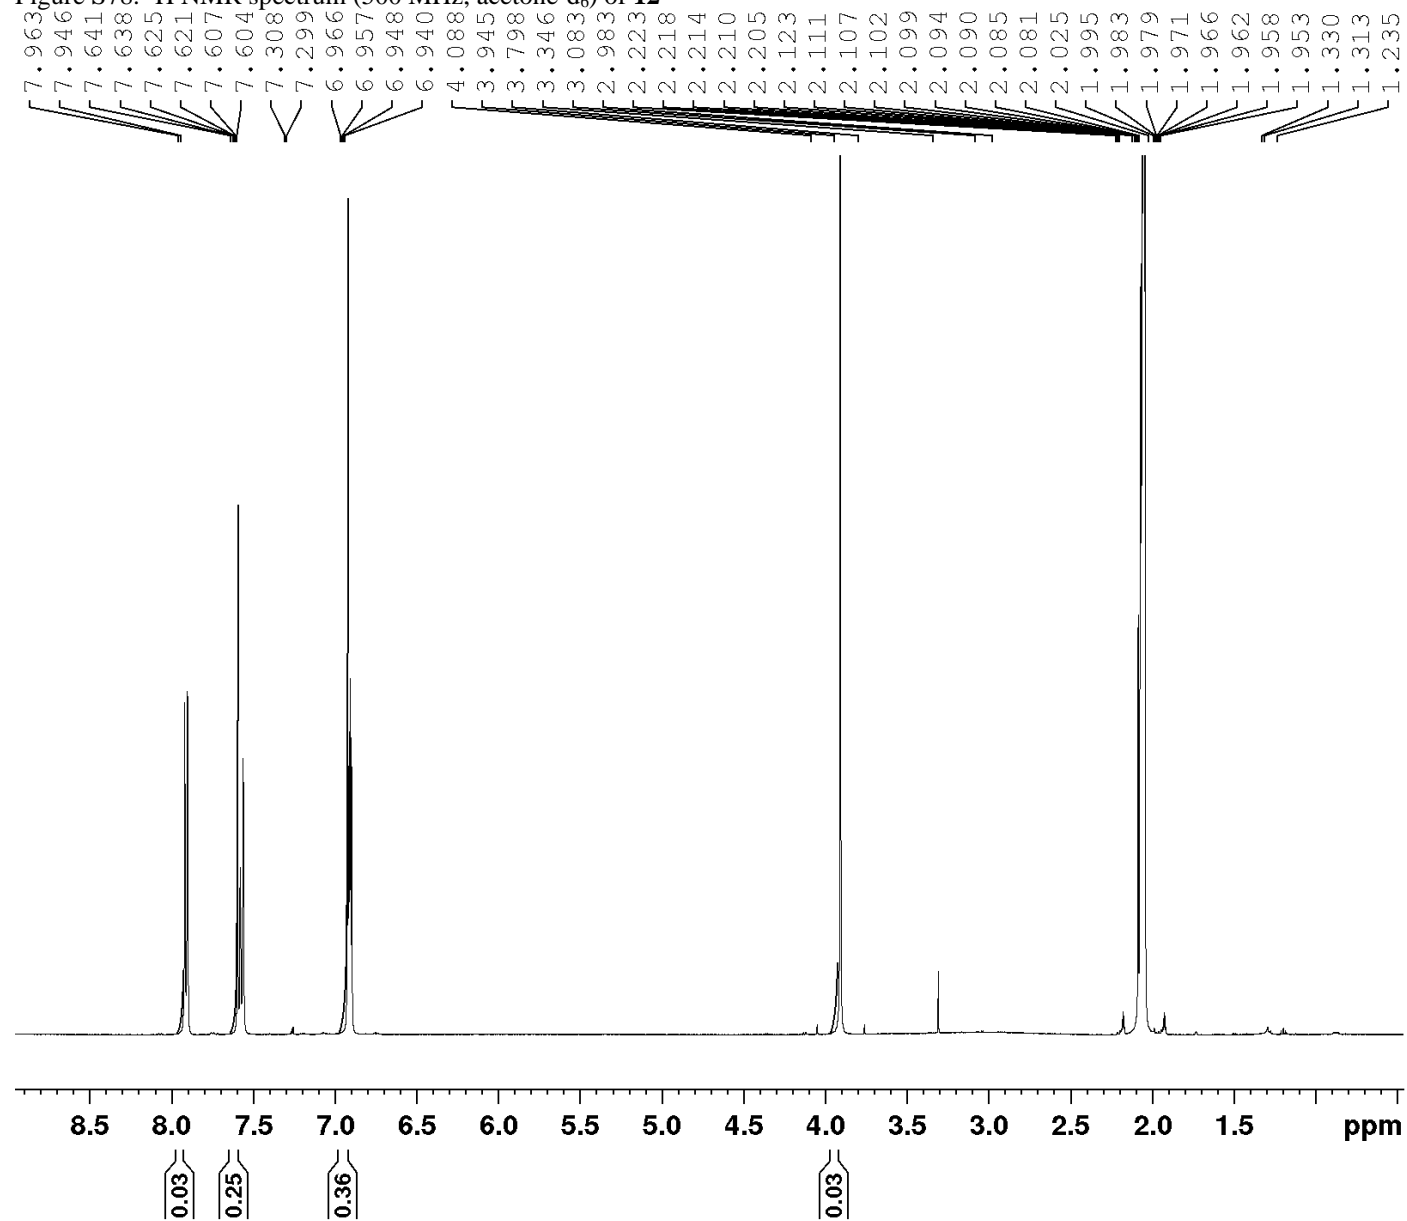

Current Data Parameters  
NAME Aster-8a  
EXPNO 5  
PROCNO 1

F2 - Acquisition Parameters  
Date\_ 20210218  
Time 12.50 h  
INSTRUM spect  
PROBHD Z113652\_0155 (   
PULPROG zg30  
TD 32768  
SOLVENT Acetone  
NS 8  
DS 2  
SWH 4251.701 Hz  
FIDRES 0.259503 Hz  
AQ 3.8535168 sec  
RG 119.65  
DW 117.600 usec  
DE 6.50 usec  
TE 303.1 K  
D1 2.00000000 sec  
TD0 1  
SFO1 500.1323695 MHz  
NUC1 1H  
P0 3.88 usec  
P1 11.65 usec  
PLW1 15.84899998 W

F2 - Processing parameters  
SI 65536  
SF 500.1300134 MHz  
WDW EM  
SSB 0  
LB 0.30 Hz  
GB 0  
PC 1.00



Figure S79.  $^{13}\text{C}$  NMR spectrum (125.77 MHz, acetone- $d_6$ ) of **12**

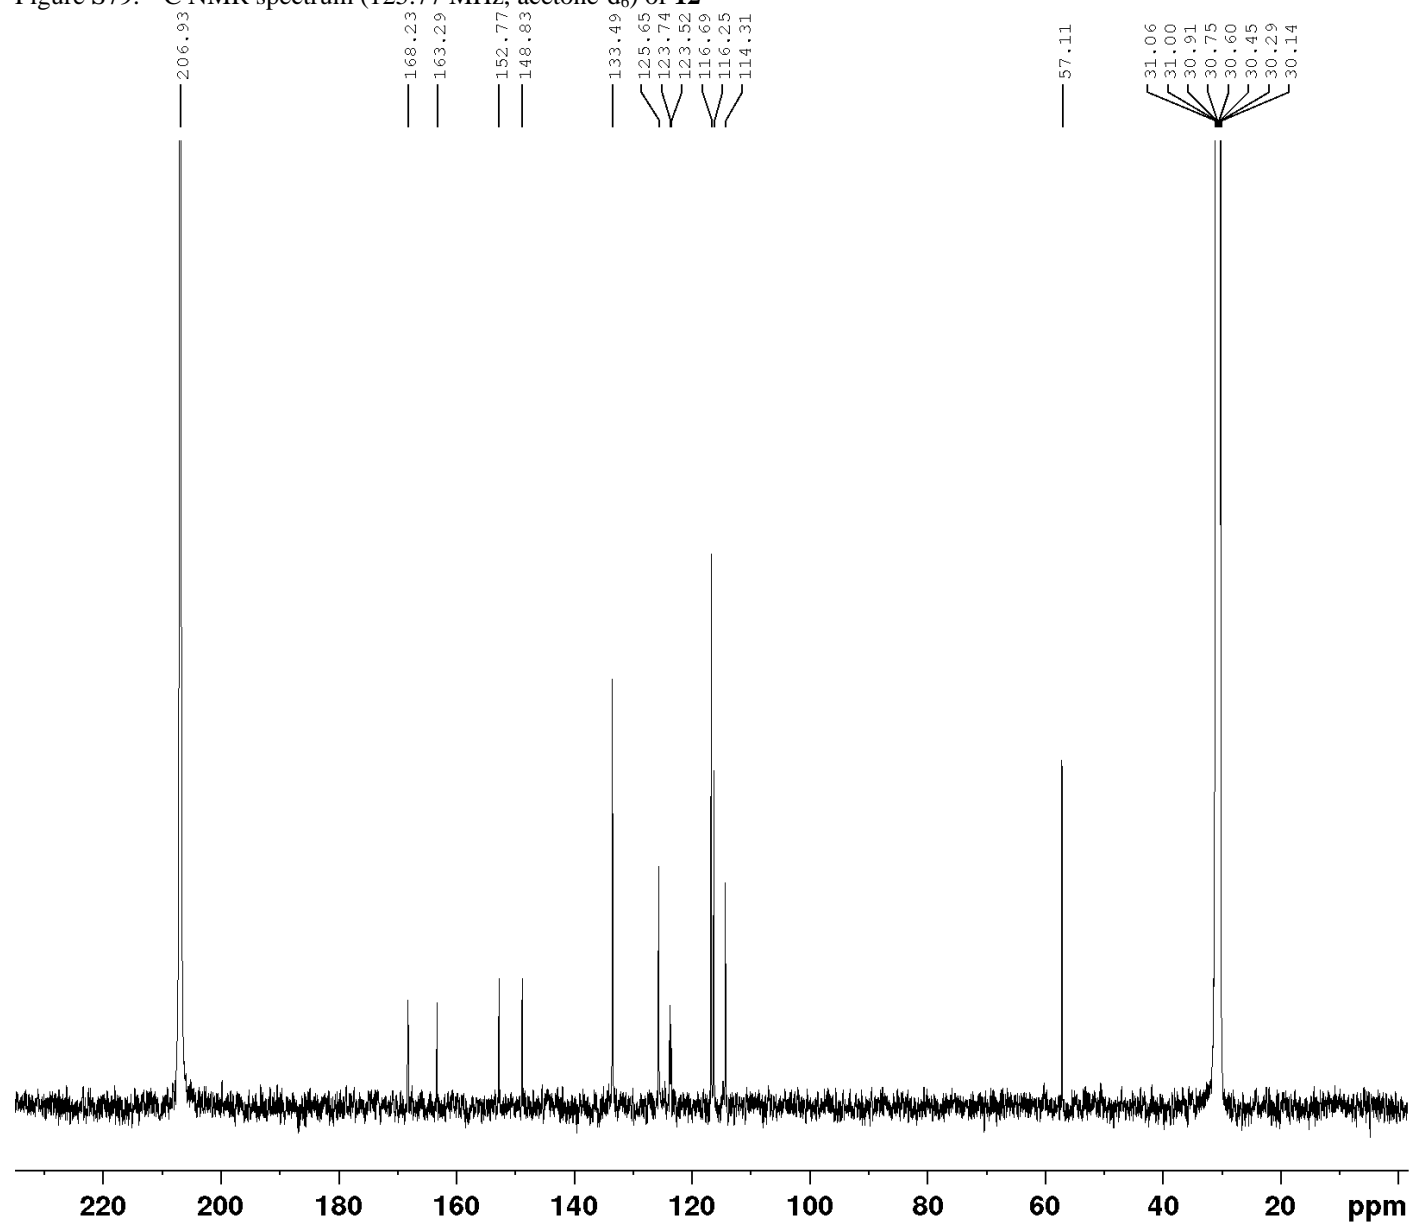

Current Data Parameters  
NAME Aster-8a  
EXPNO 11  
PROCNO 1

F2 - Acquisition Parameters  
Date\_ 20210218  
Time 14.23 h  
INSTRUM spect  
PROBHD Z113652\_0155 (  
PULPROG zgpg30  
TD 32768  
SOLVENT Acetone  
NS 2283  
DS 4  
SWH 29761.904 Hz  
FIDRES 1.816522 Hz  
AQ 0.5505024 sec  
RG 196.84  
DW 16.800 usec  
DE 6.50 usec  
TE 303.1 K  
D1 1.50000000 sec  
D11 0.03000000 sec  
TD0 32  
SFO1 125.7722511 MHz  
NUC1  $^{13}\text{C}$   
P0 4.03 usec  
P1 12.10 usec  
PLW1 79.43299866 W  
SFO2 500.1320005 MHz  
NUC2  $^1\text{H}$   
CPDPRG[2] waltz16  
PCPD2 80.00 usec  
PLW2 15.84899998 W  
PLW12 0.33610001 W  
PLW13 0.16906001 W

F2 - Processing parameters  
SI 65536  
SF 125.7575778 MHz  
WDW EM  
SSB 0  
LB 5.00 Hz  
GB 0  
PC 1.30

Figure S80. COSY-45 spectrum (500 MHz, acetone-d<sub>6</sub>) of **12**

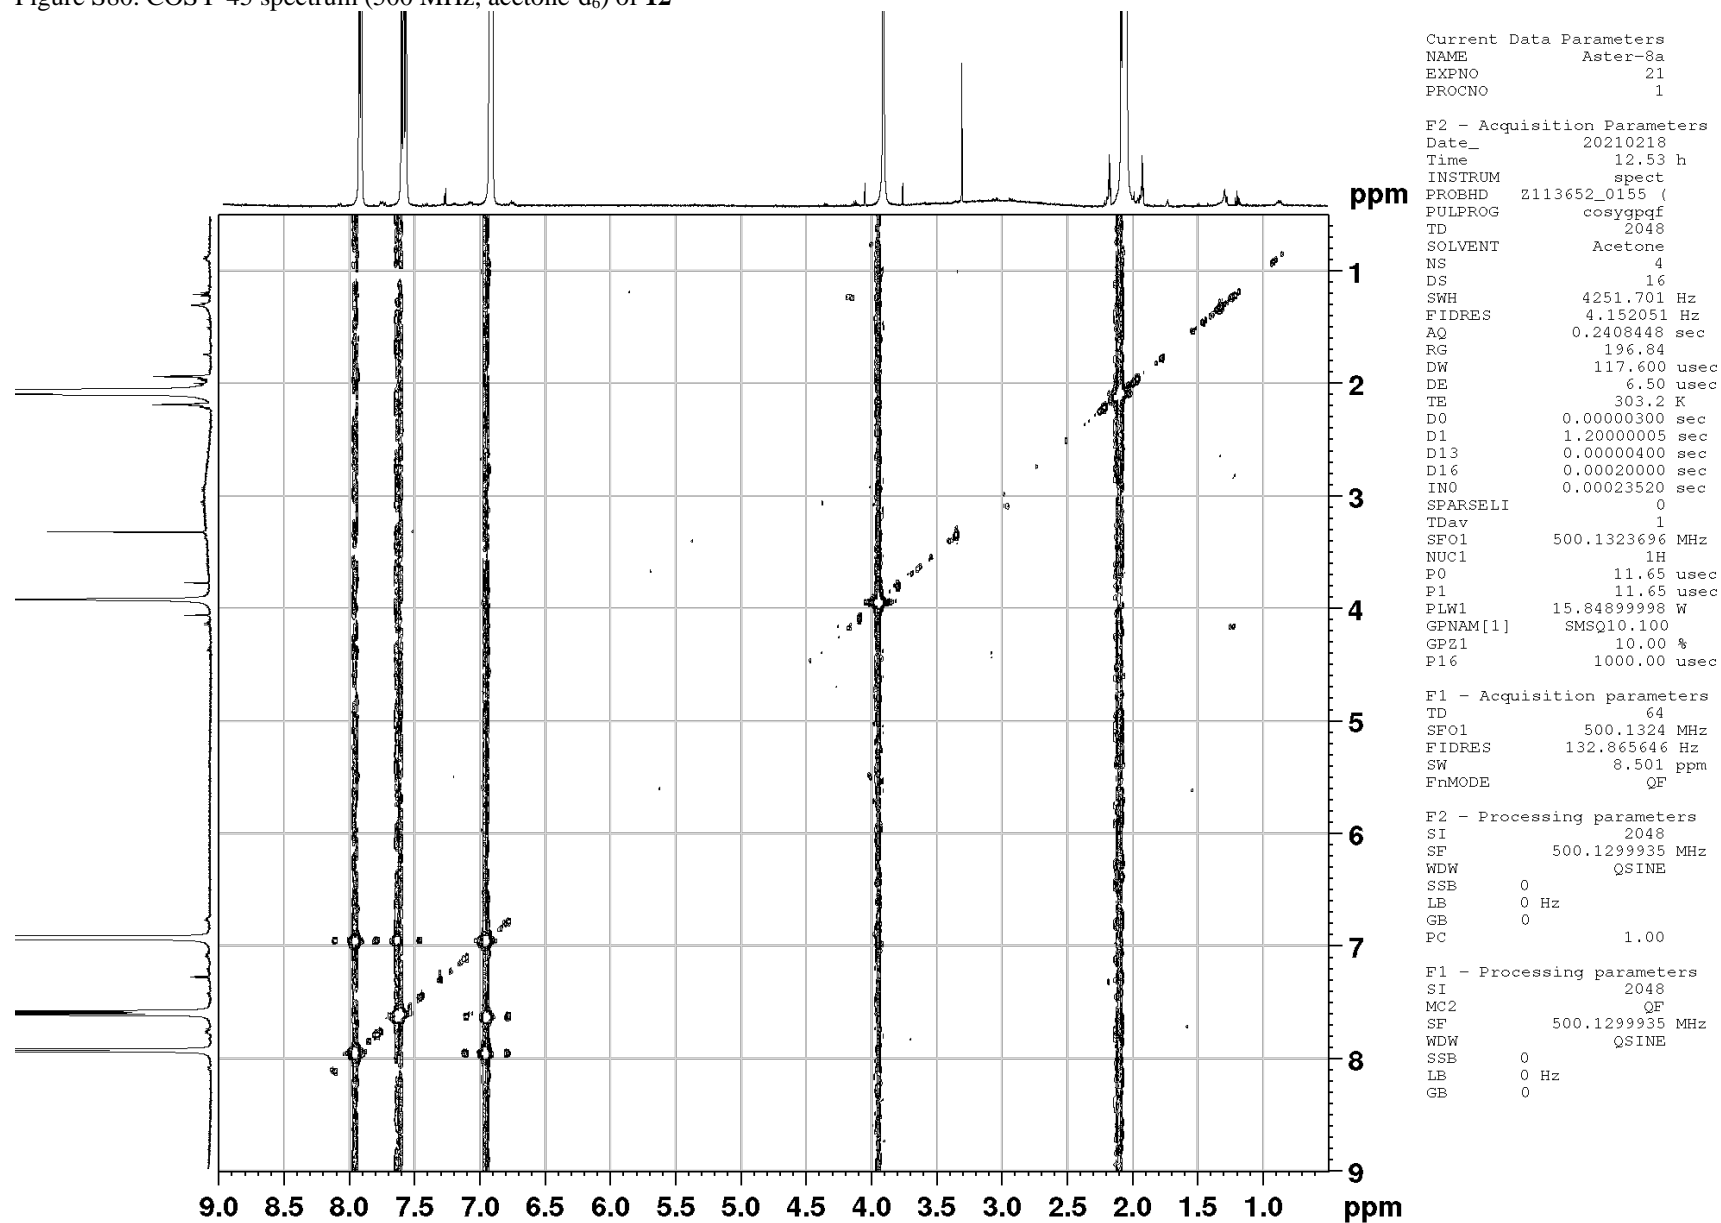

Figure S81. HSQC spectrum (500 MHz, acetone-d<sub>6</sub>) of **12**

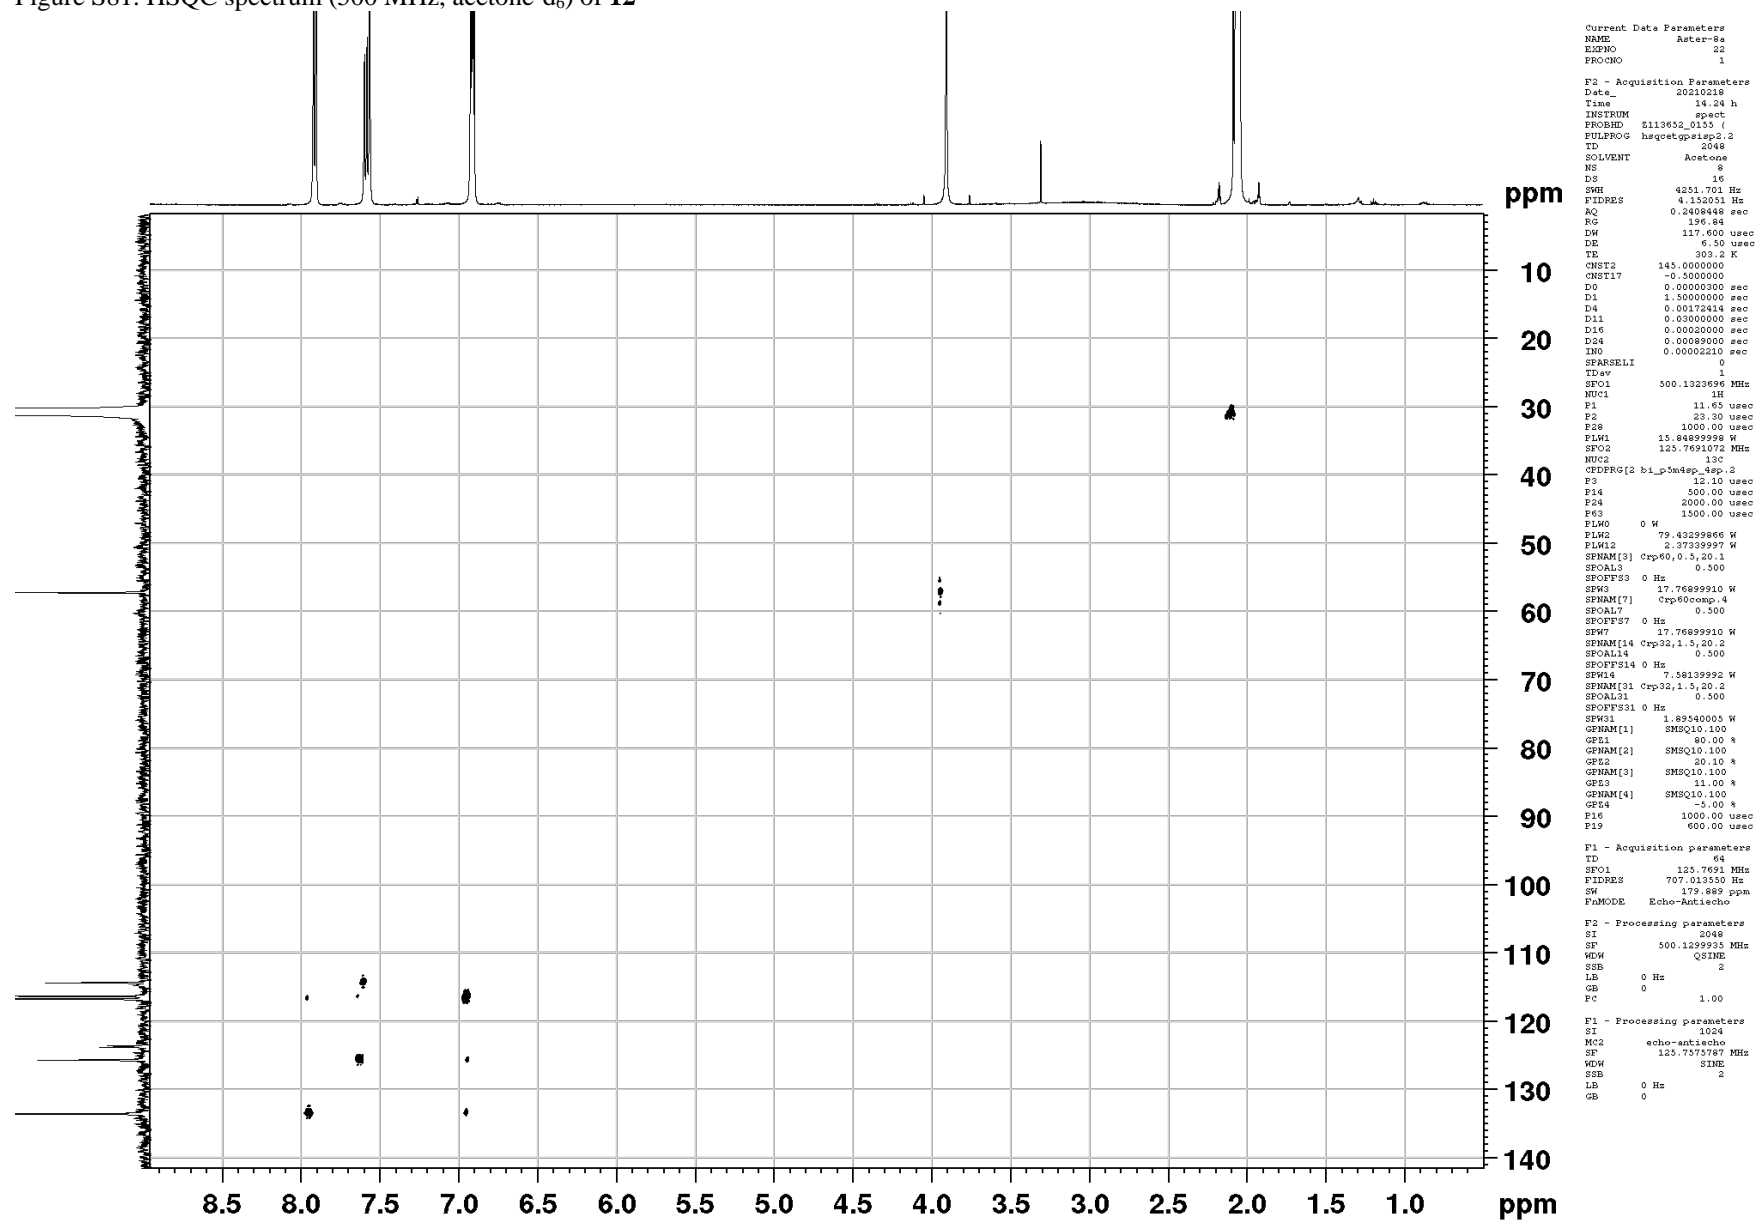

Figure S82. HMBC spectrum (700 MHz, acetone-d<sub>6</sub>) of **12**

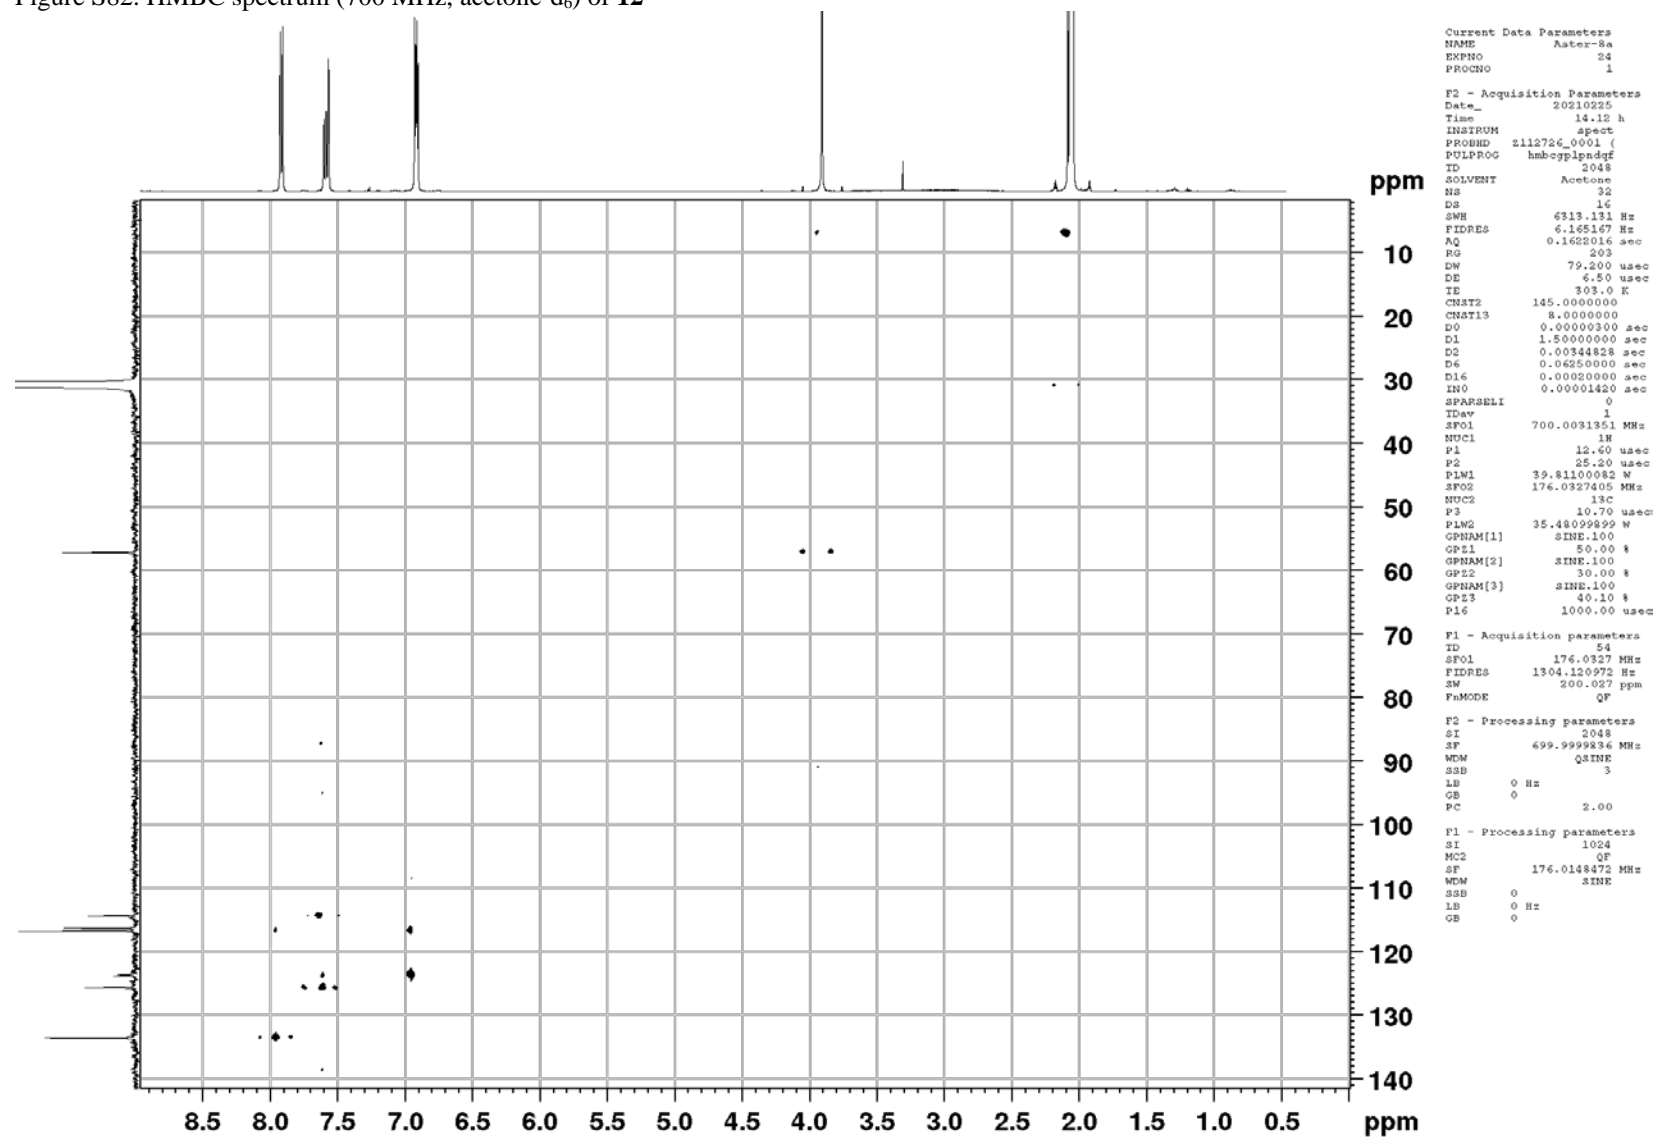

Figure S83. ROESY spectrum (700 MHz, acetone-d<sub>6</sub>) of **12**

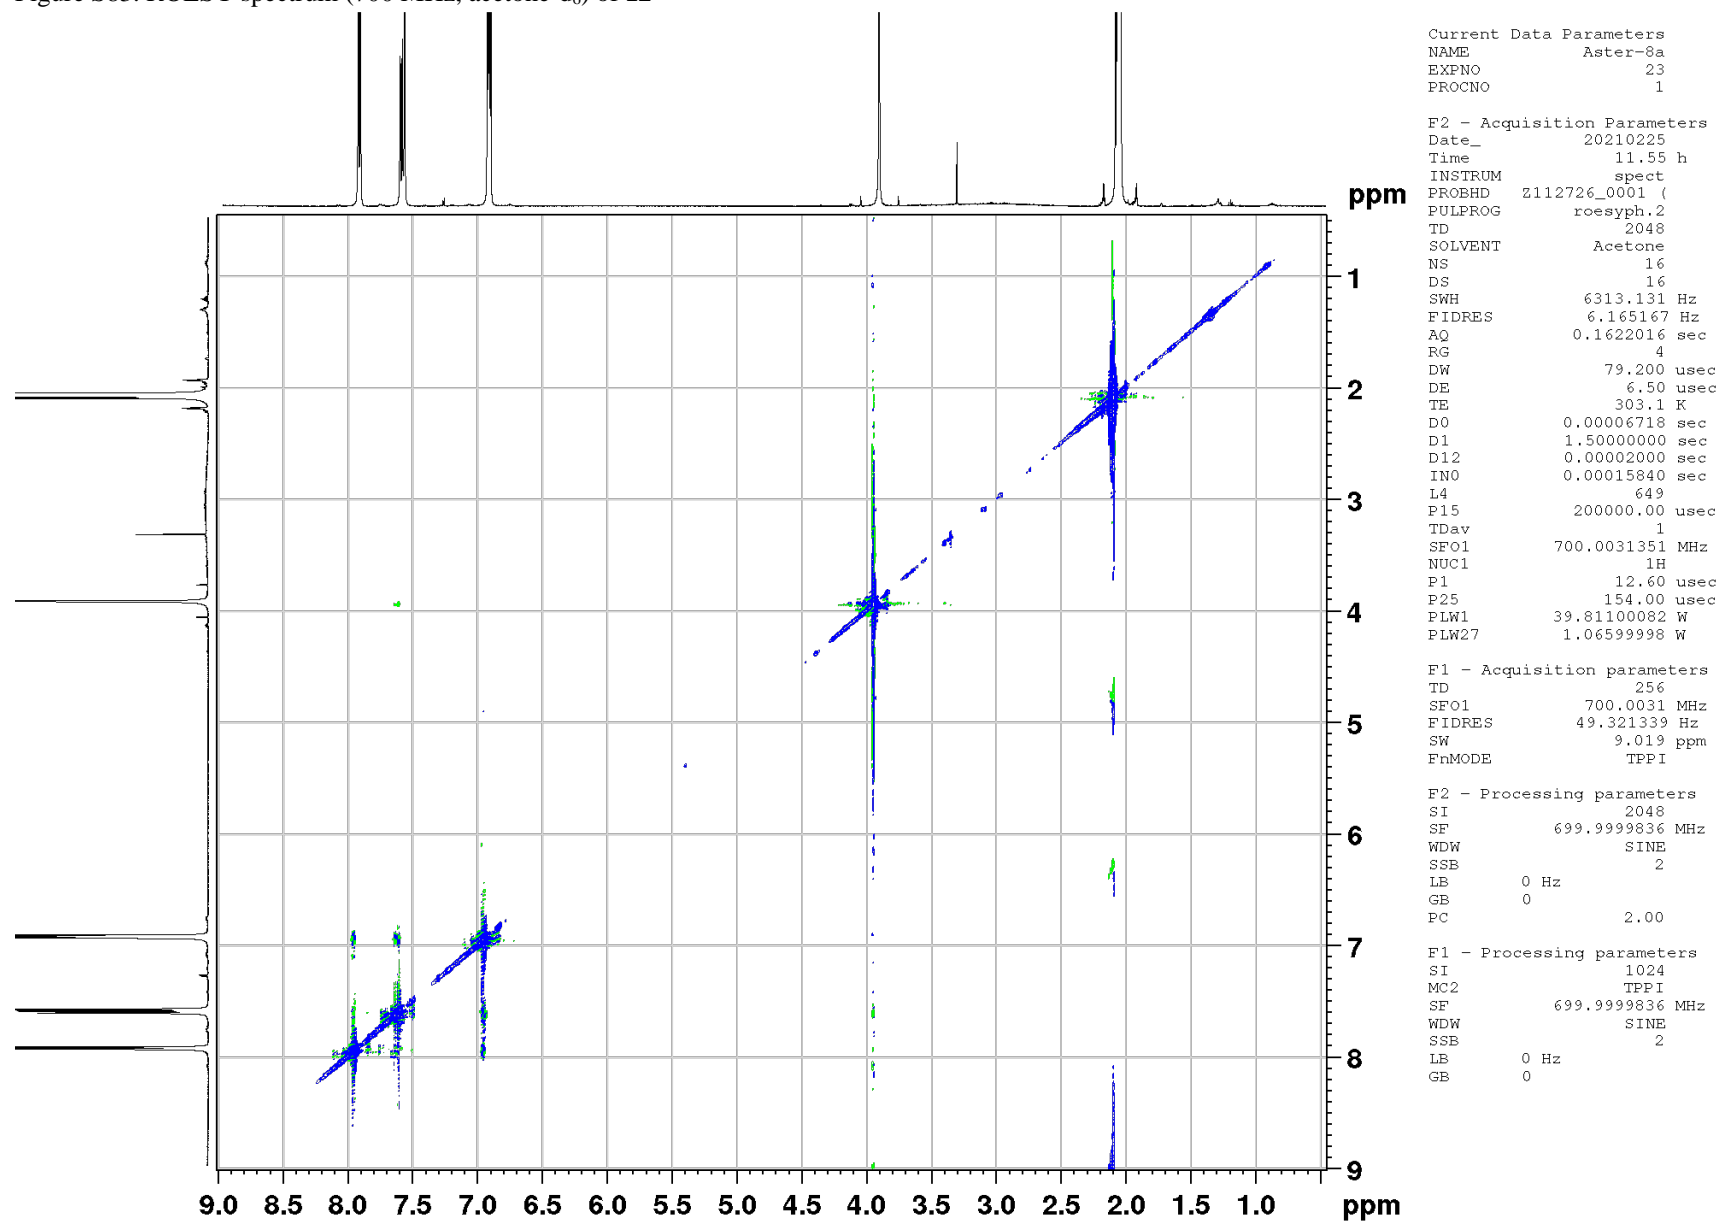

Figure S84.  $^1\text{H}$  NMR spectrum (700 MHz,  $\text{CDCl}_3$ ) of **13**

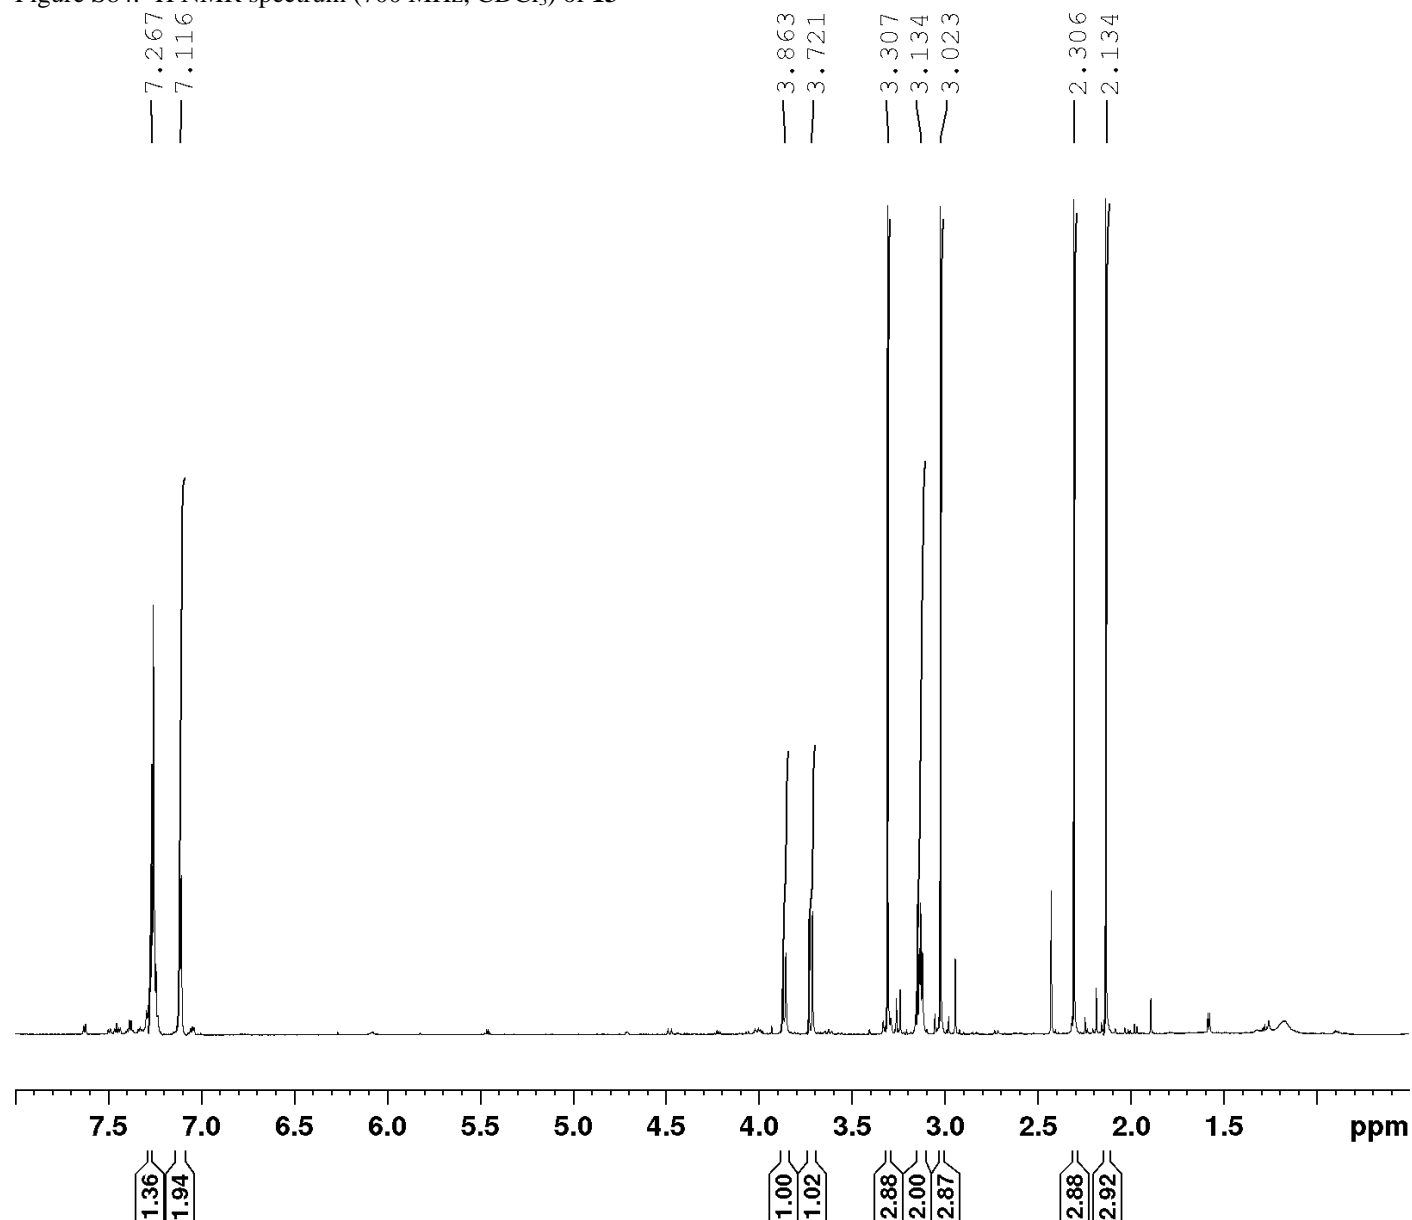

Current Data Parameters  
NAME Aster-5  
EXPNO 5  
PROCNO 1

F2 - Acquisition Parameters  
Date\_ 20210201  
Time 13.54 h  
INSTRUM spect  
PROBHD Z112726\_0001 (  
PULPROG zg30  
TD 32768  
SOLVENT  $\text{CDCl}_3$   
NS 8  
DS 2  
SWH 5252.101 Hz  
FIDRES 0.320563 Hz  
AQ 3.1195135 sec  
RG 203  
DW 95.200 usec  
DE 6.50 usec  
TE 302.6 K  
D1 2.00000000 sec  
TD0 1  
SFO1 700.0029934 MHz  
NUC1  $^1\text{H}$   
P0 4.20 usec  
P1 12.60 usec  
PLW1 39.81100082 W

F2 - Processing parameters  
SI 32768  
SF 700.0000161 MHz  
WDW EM  
SSB 0  
LB 0.30 Hz  
GB 0  
PC 1.00

Figure S85.  $^{13}\text{C}$  NMR spectrum (176.04 MHz,  $\text{CDCl}_3$ ) of **13**

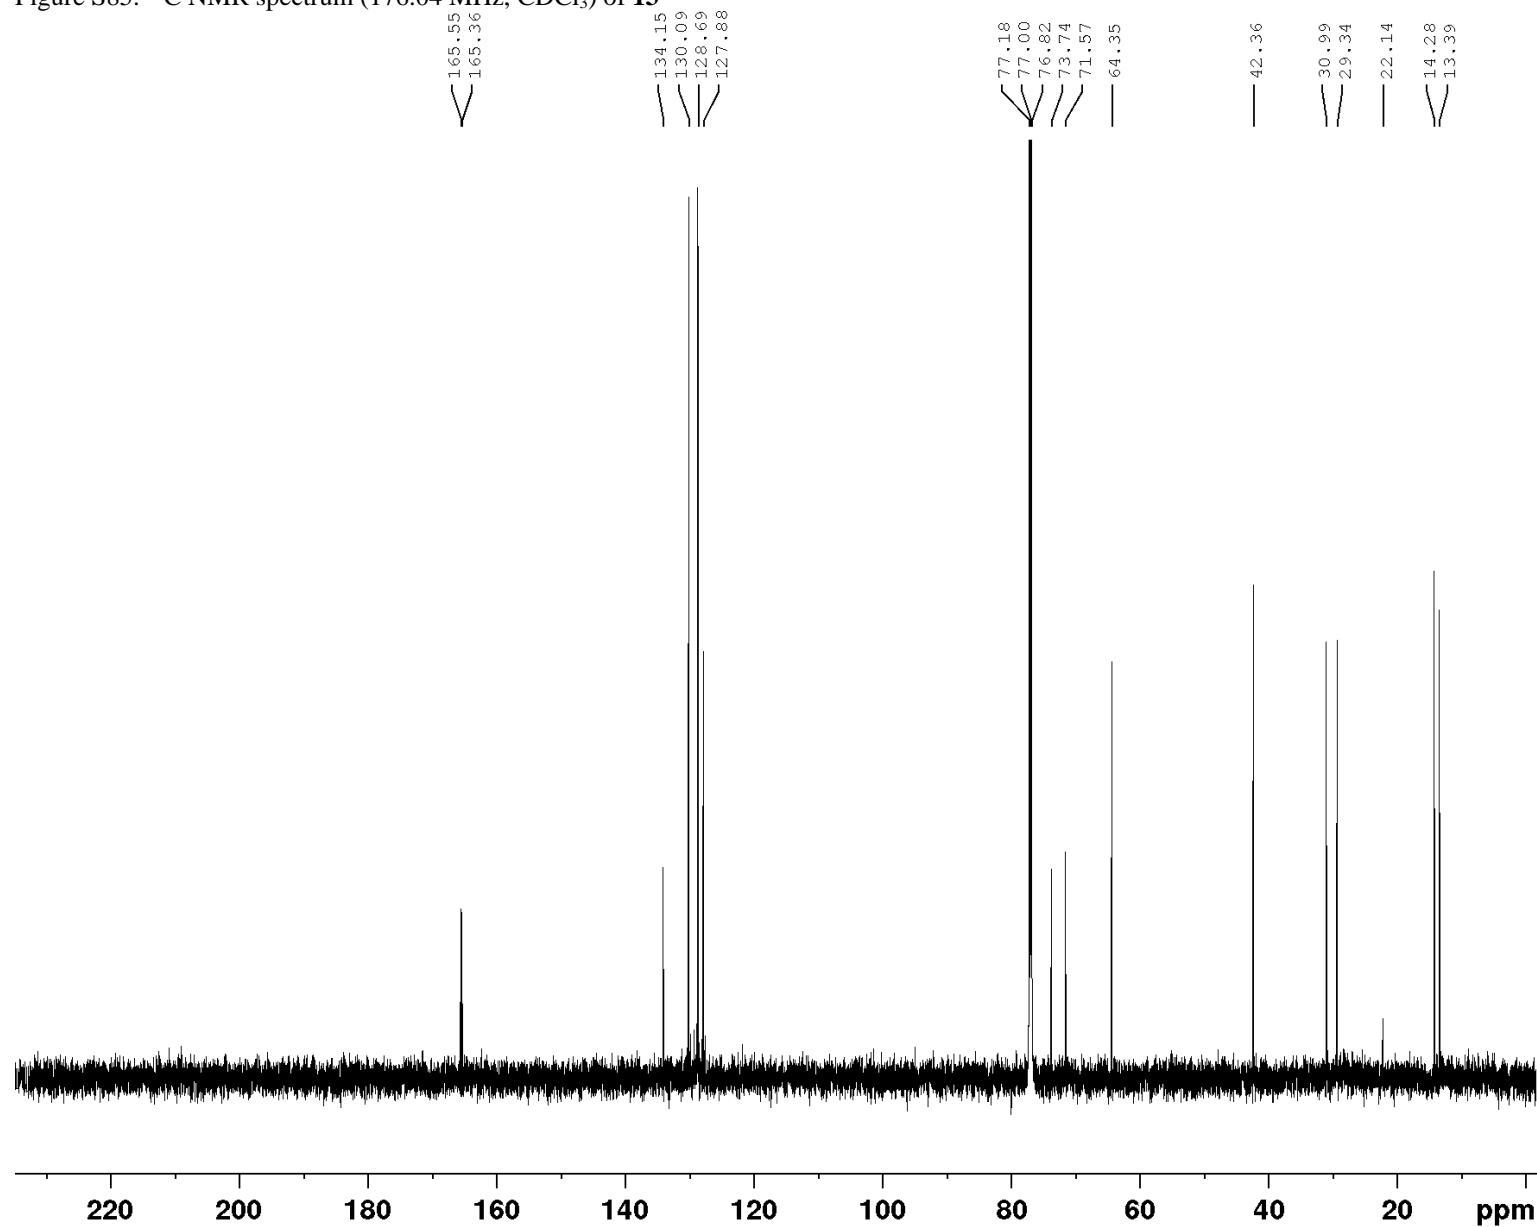

```

Current Data Parameters
NAME          Aster-5
EXPNO         11
PROCNO        1

F2 - Acquisition Parameters
Date_         20210201
Time          13.49 h
INSTRUM       spect
PROBHD        Z112726_0001 (
PULPROG       zgpg30
TD            32768
SOLVENT       CDCl3
NS            1142
DS            2
SWH           42613.637 Hz
FIDRES        2.600930 Hz
AQ            0.3844779 sec
RG            203
DW            11.733 usec
DE            6.50 usec
TE            303.4 K
D1            1.50000000 sec
D11           0.03000000 sec
TD0           4096
SFO1          176.0353807 MHz
NUC1          13C
P0            3.50 usec
P1            10.50 usec
PLW1          35.48099899 W
SFO2          700.0035000 MHz
NUC2          1H
CPDPRG[2]    waltz16
PCPD2         70.00 usec
PLM2          39.81100082 W
PLM12         1.43719995 W
PLM13         0.83929998 W

F2 - Processing parameters
SI            65536
SF            176.0151411 MHz
WDW           EM
SSB           0
LB            1.50 Hz
GB            0
PC            1.40
    
```

Figure S86. DEPT-135 NMR spectrum (176.04 MHz, CDCl<sub>3</sub>) of **13**

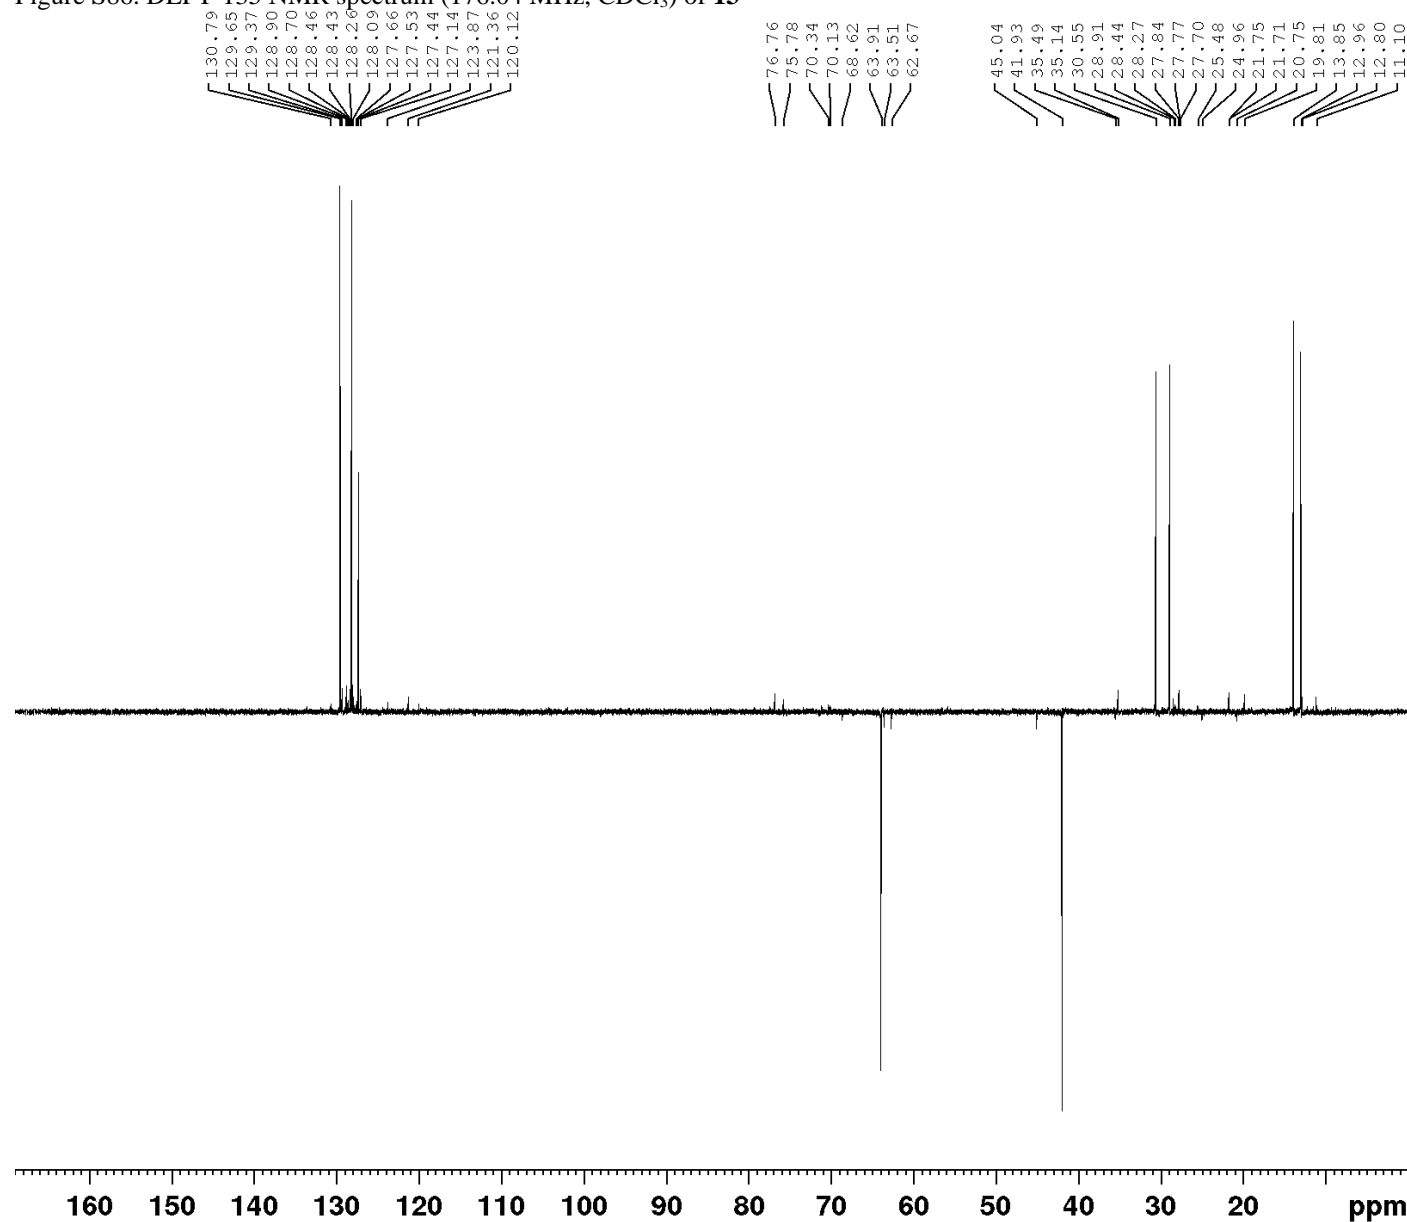

Current Data Parameters  
NAME Aster-5  
EXPNO 25  
PROCNO 1

F2 - Acquisition Parameters  
Date\_ 20210202  
Time 9.40 h  
INSTRUM spect  
PROBHD z112726\_0001 (  
PULPROG deptsp135  
TD 65536  
SOLVENT CDCl3  
NS 6029  
DS 2  
SWH 29761.904 Hz  
FIDRES 0.908261 Hz  
AQ 1.1010048 sec  
RG 203  
DW 16.800 usec  
DE 6.50 usec  
TE 303.2 K  
CNST2 145.0000000  
D1 2.00000000 sec  
D2 0.00344828 sec  
D12 0.00002000 sec  
TDO 4096  
SFO1 176.0301003 MHz  
NUC1 13C  
P1 10.50 usec  
P13 2000.00 usec  
PLW0 0 W  
PLW1 35.48099899 W  
SPNAM[5] Crp80comp.4  
SFOAL5 0.500  
SPOFFS5 0 Hz  
SPW5 7.96899986 W  
SFO2 700.0028000 MHz  
NUC2 1H  
CPDPRG[2] waltz16  
P3 13.30 usec  
P4 26.60 usec  
PCPD2 70.00 usec  
PLW2 39.81100082 W  
PLW12 1.43719995 W

F2 - Processing parameters  
SI 65536  
SF 176.0152175 MHz  
WDW EM  
SSB 0  
LB 1.00 Hz  
GB 0  
PC 1.40



Figure S87. COSY-45 spectrum (700 MHz, CDCl<sub>3</sub>) of **13**

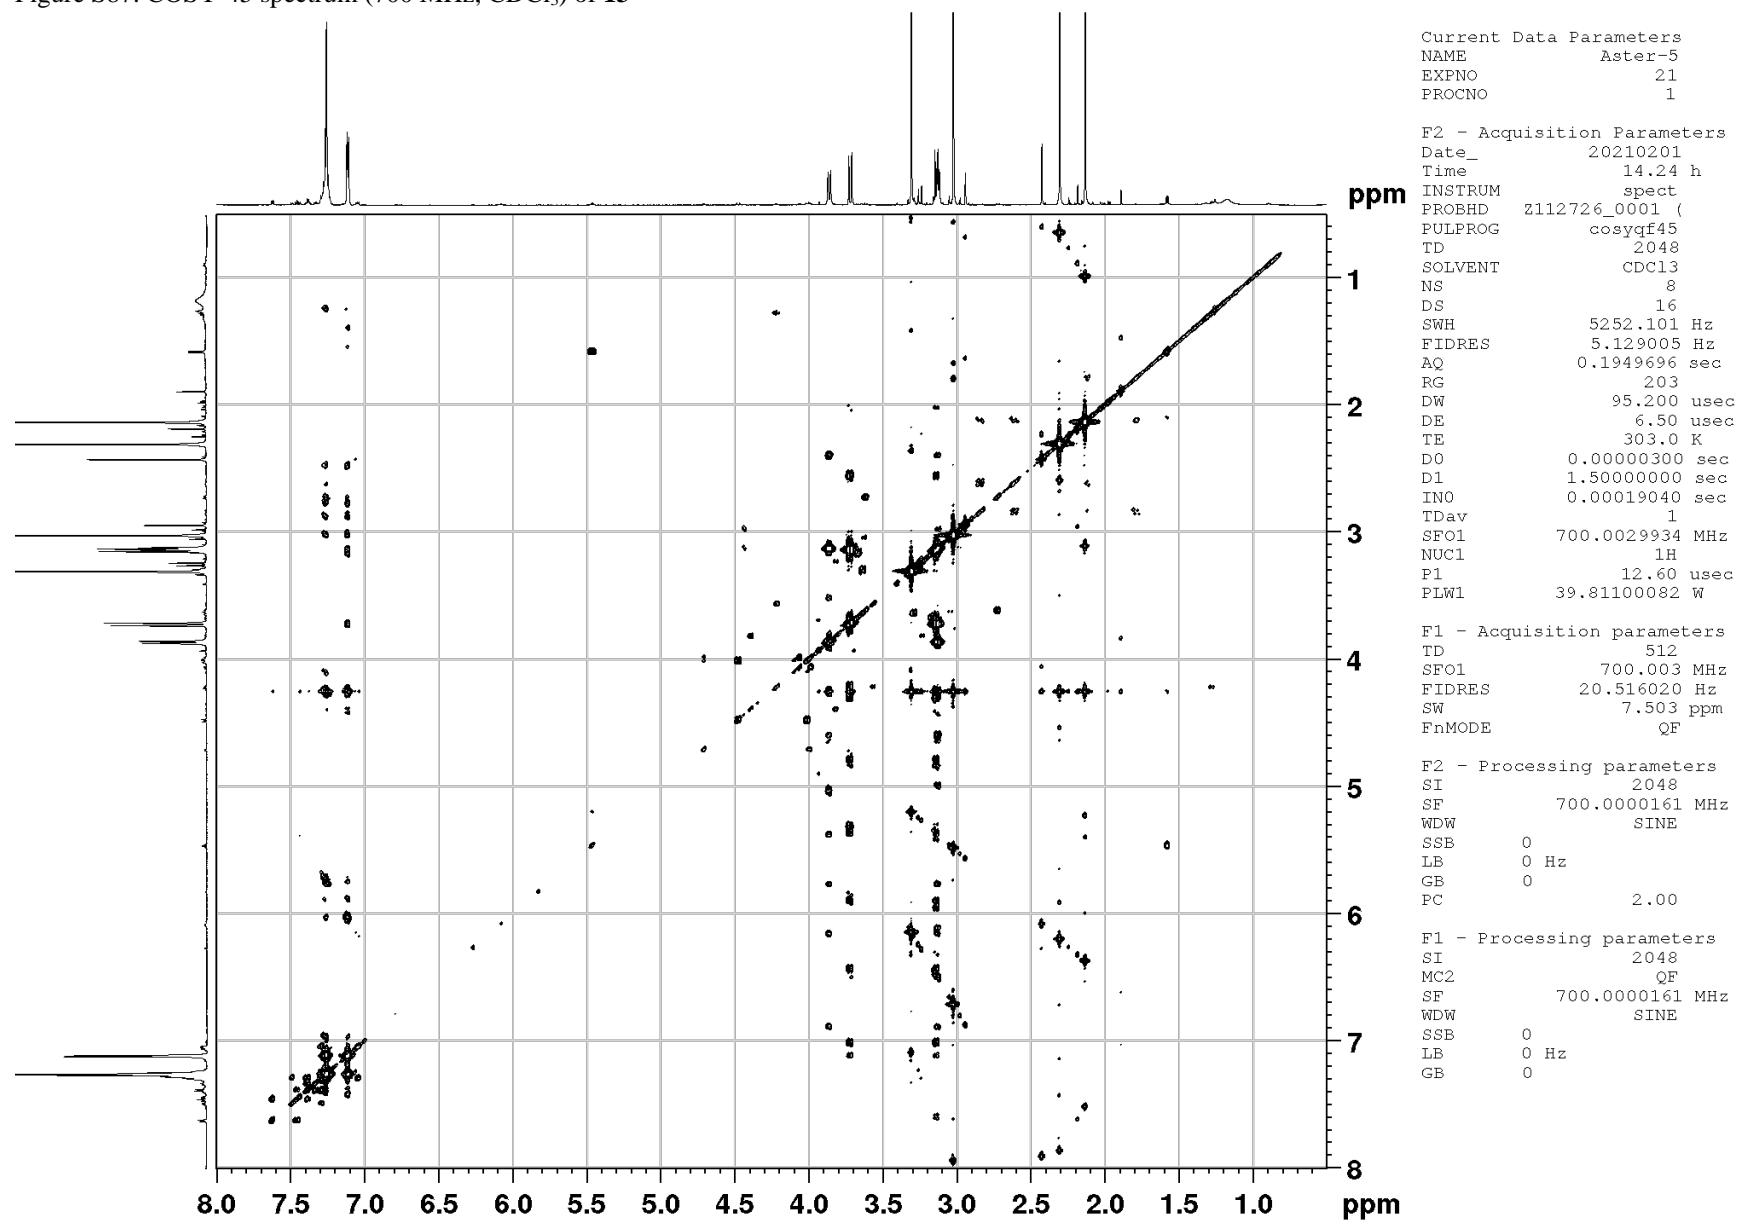

Figure S88. HSQC spectrum (700 MHz, CDCl<sub>3</sub>) of **13**

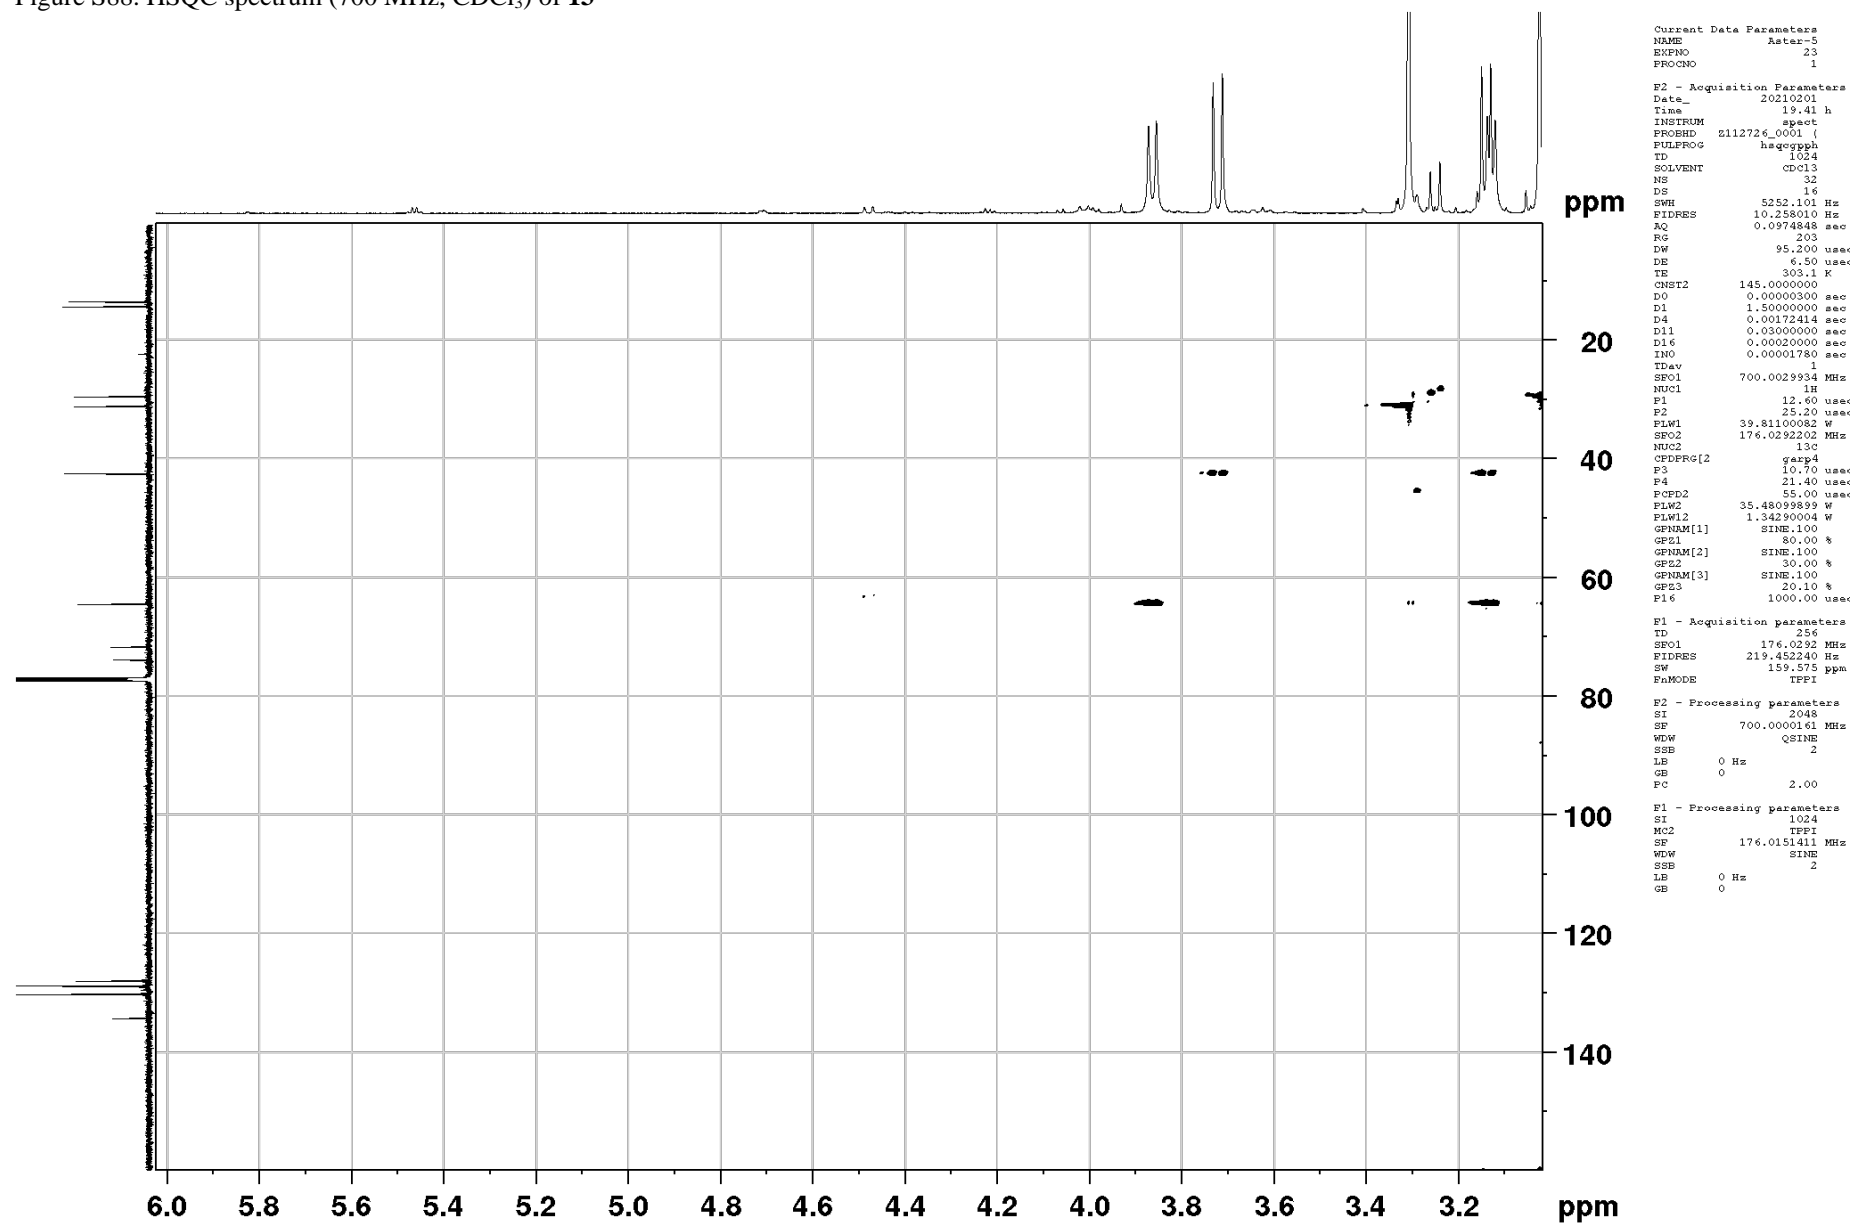

Figure S89. HMBC spectrum (700 MHz, CDCl<sub>3</sub>) of **13**

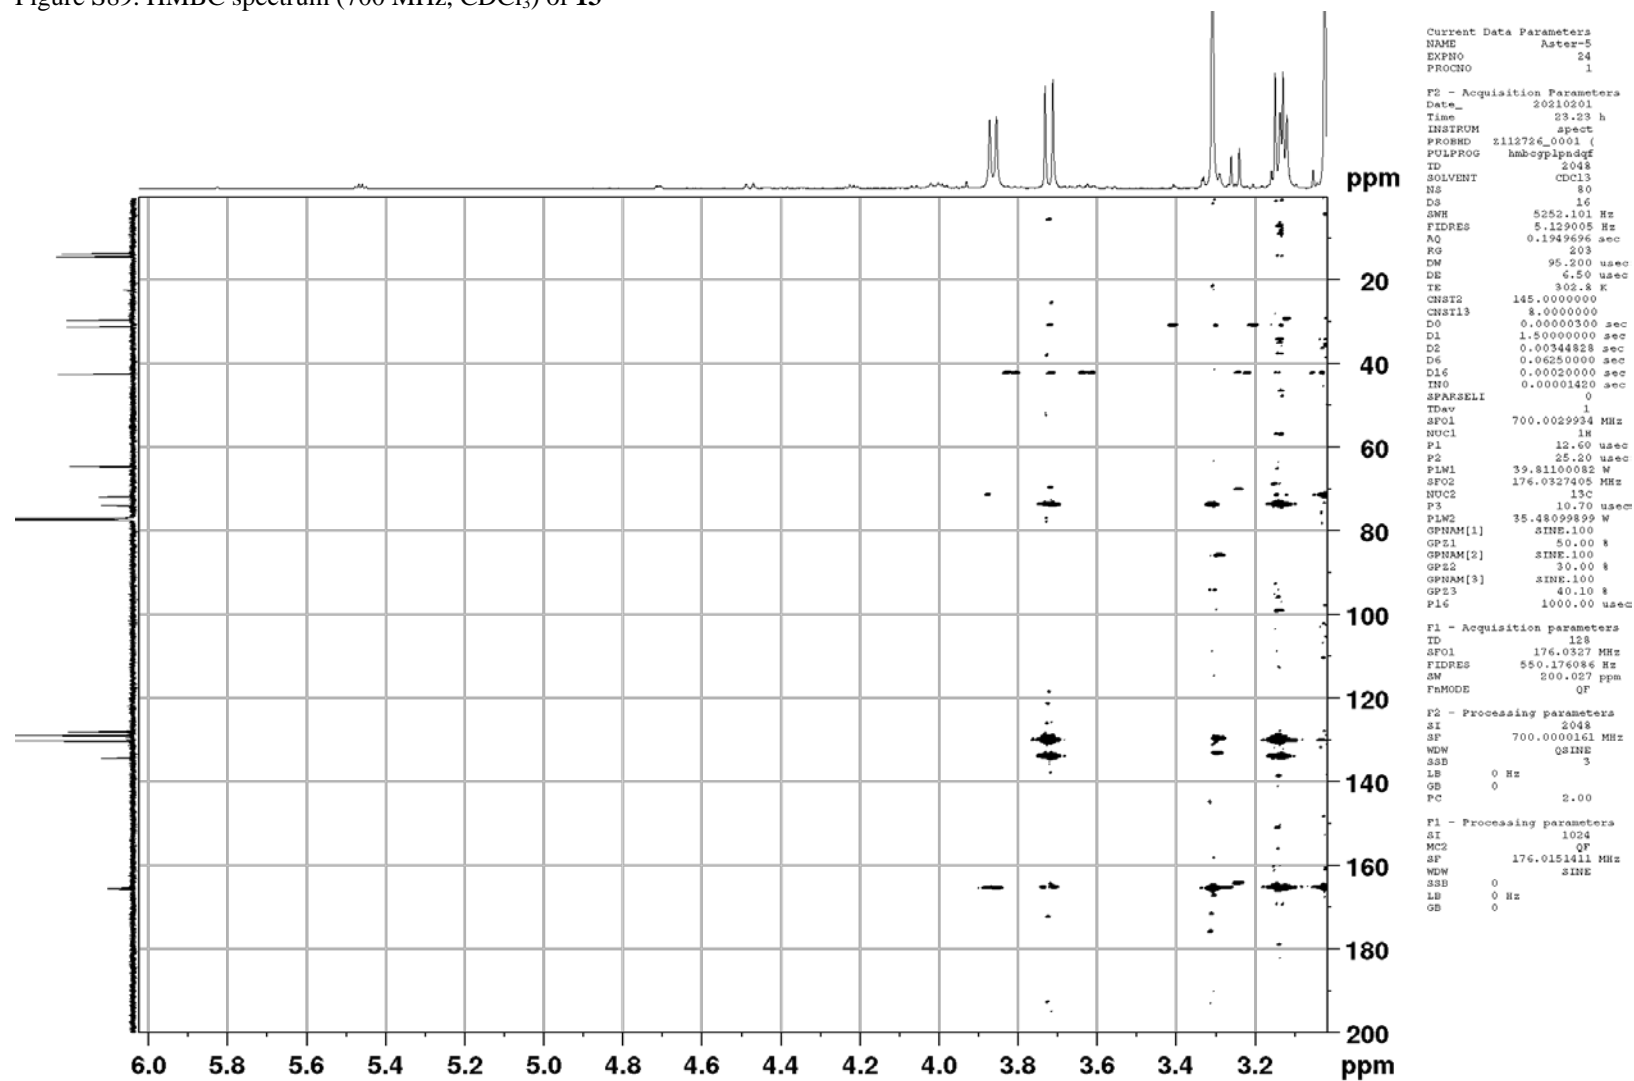

Figure S90. ROESY spectrum (700 MHz, CDCl<sub>3</sub>) of **13**

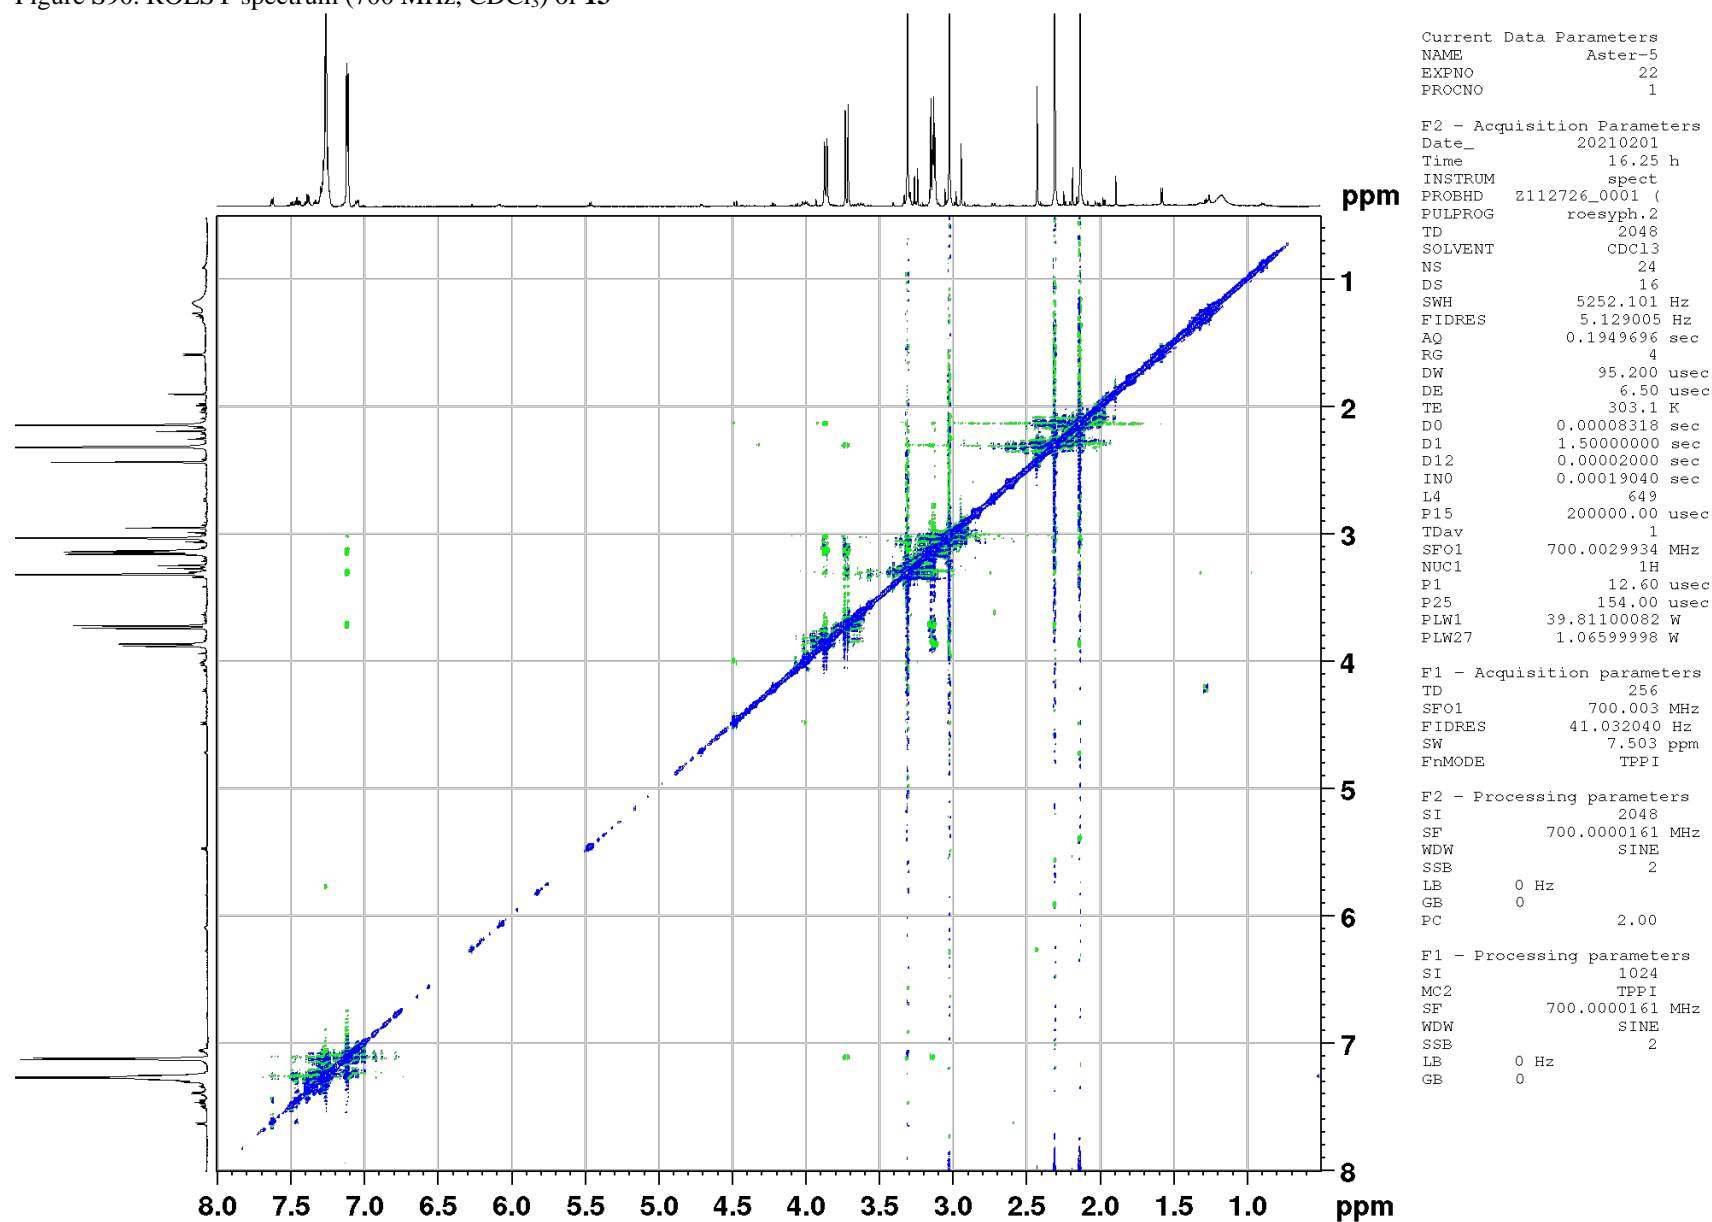

Figure S91. (+) ESI MS of **1**

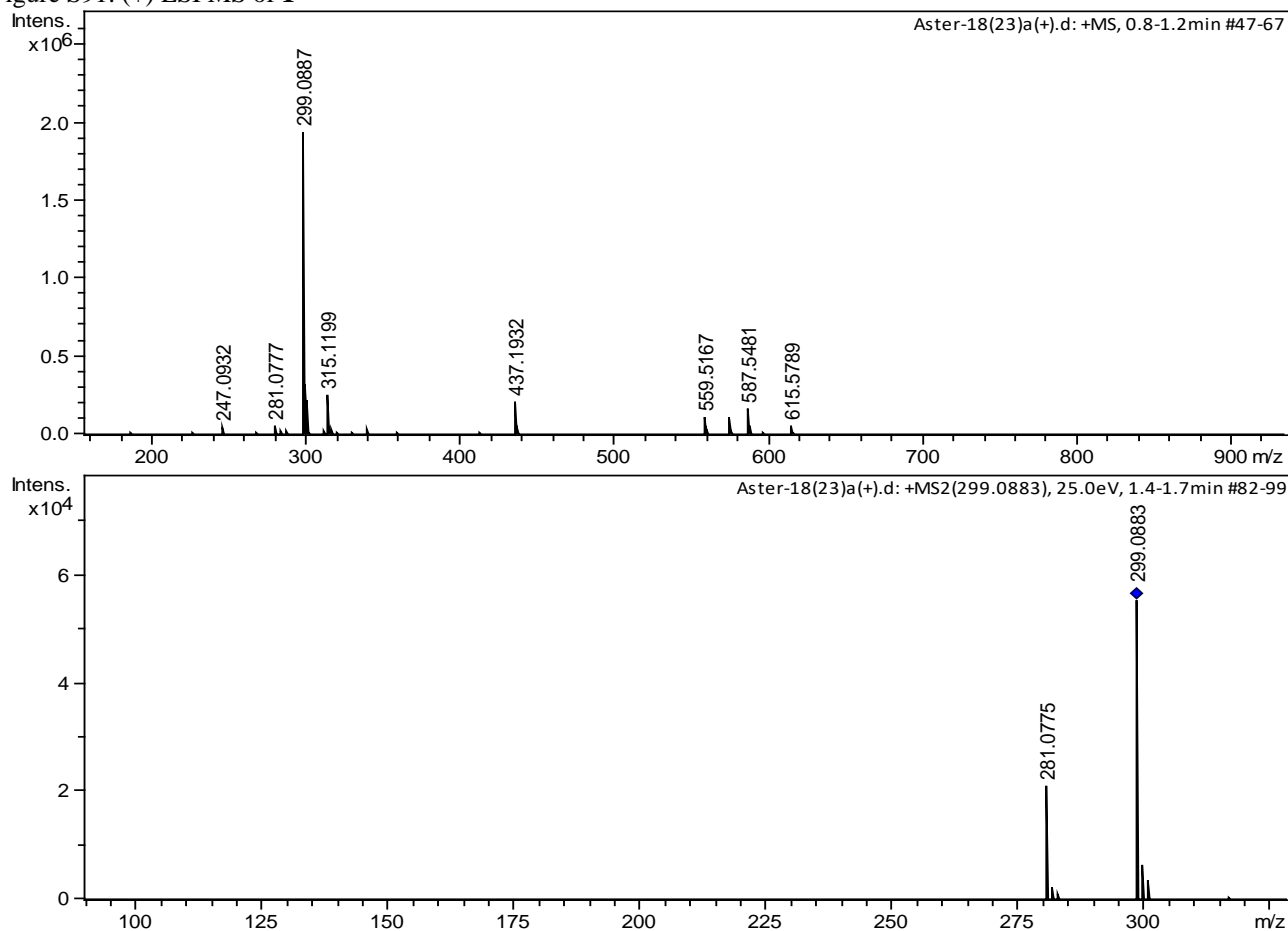

Figure S92. (-) ESI MS of **1**

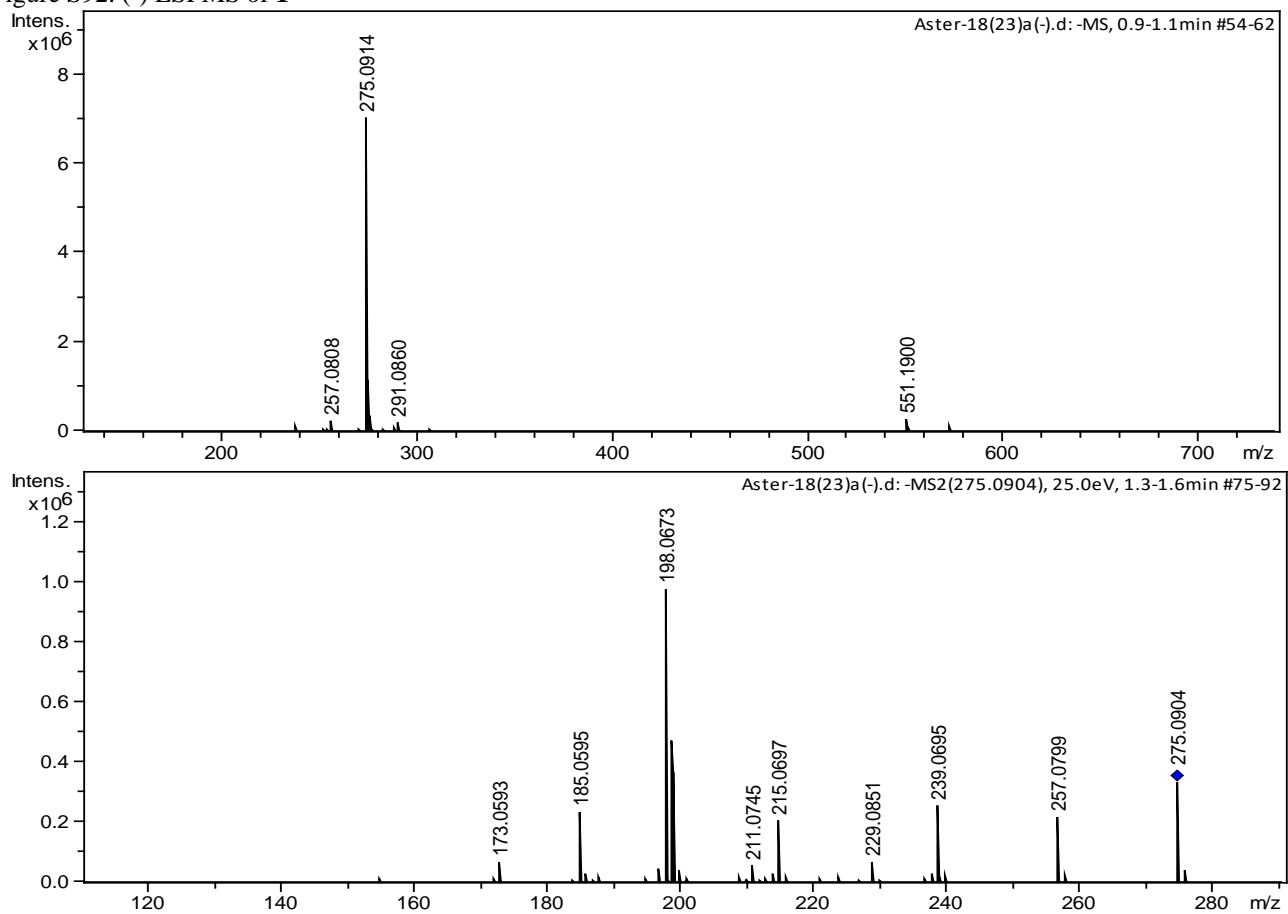

Figure S93. (+) ESI MS of **2**

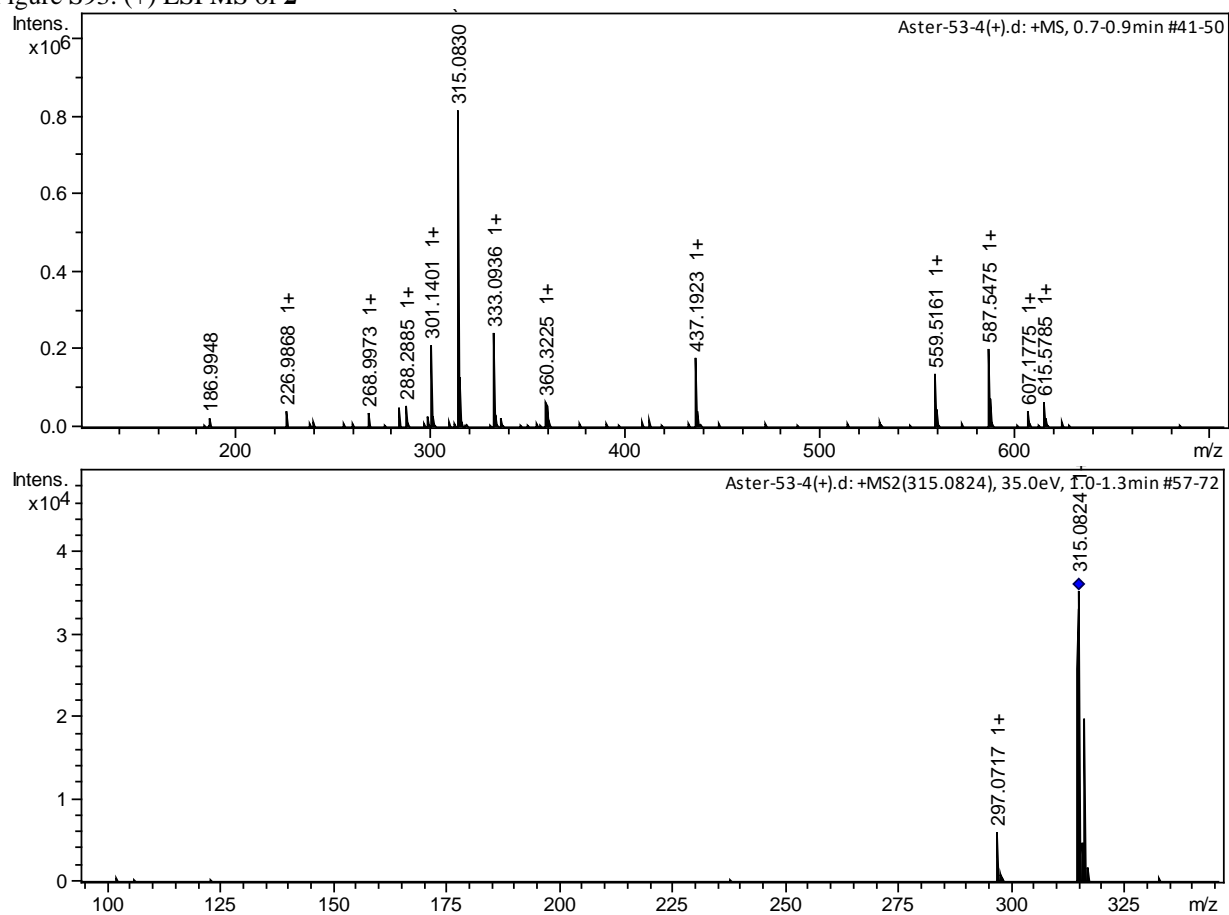

Figure S94. (-) ESI MS of **2**

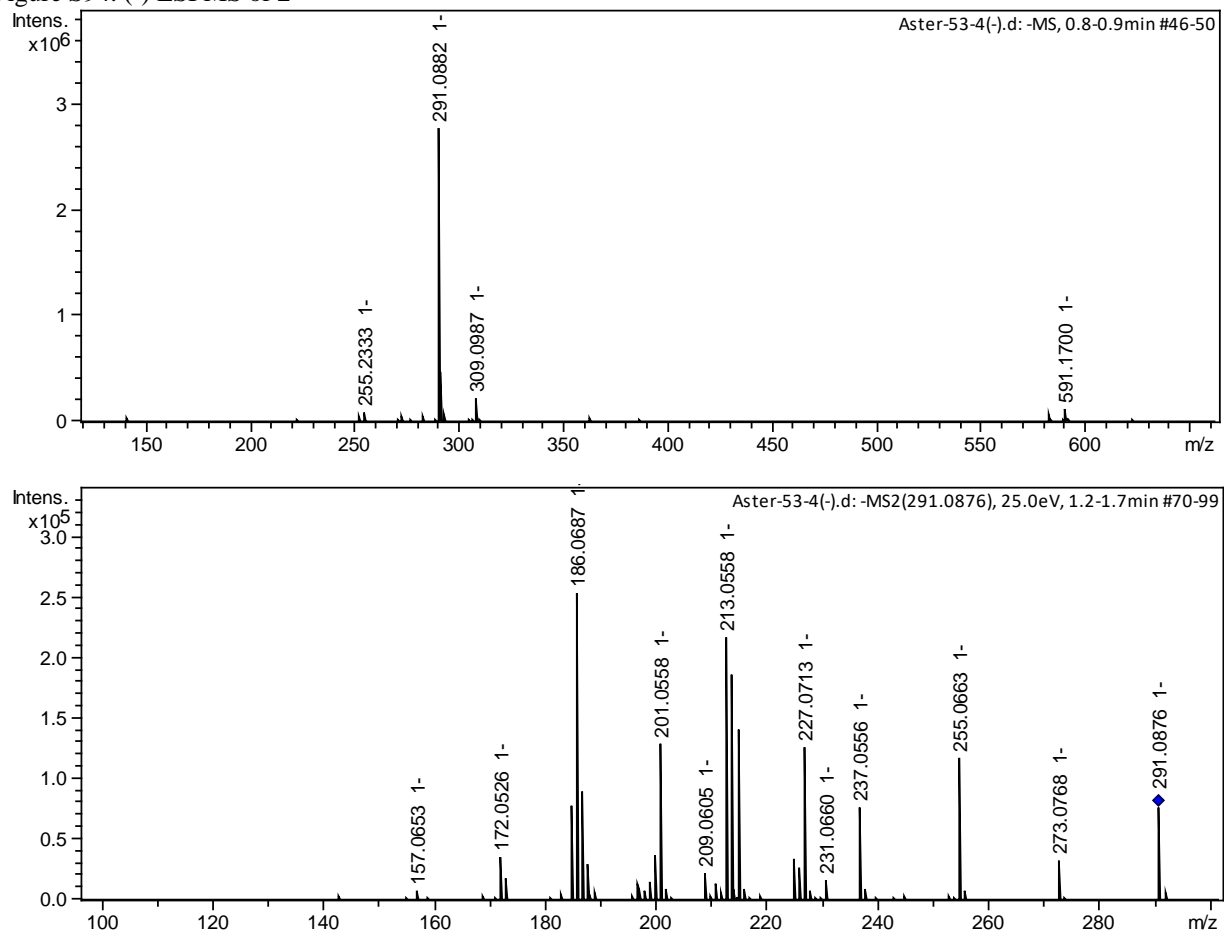

Figure S95. (+) ESI MS of **3**

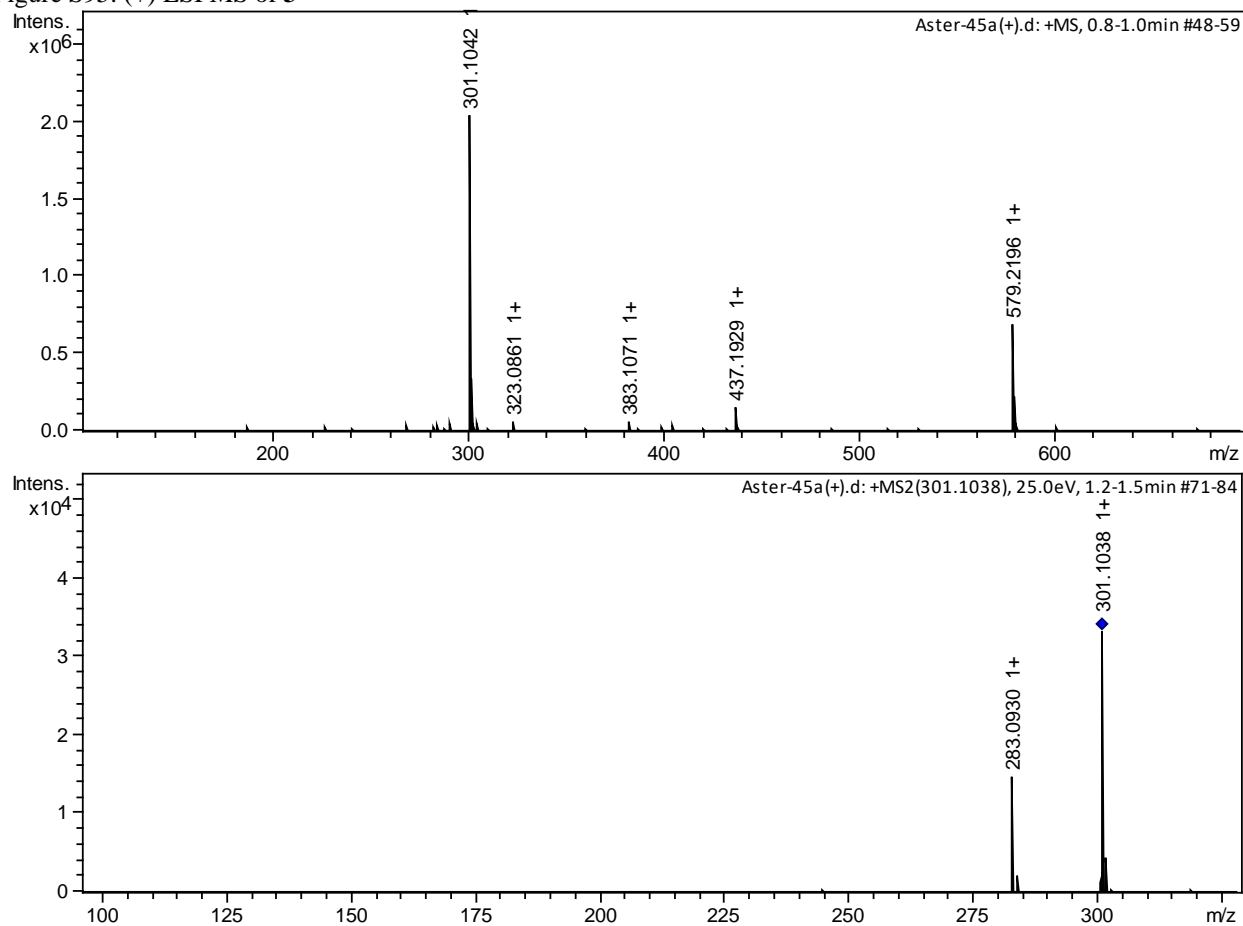

Figure S96. (-) ESI MS of **3**

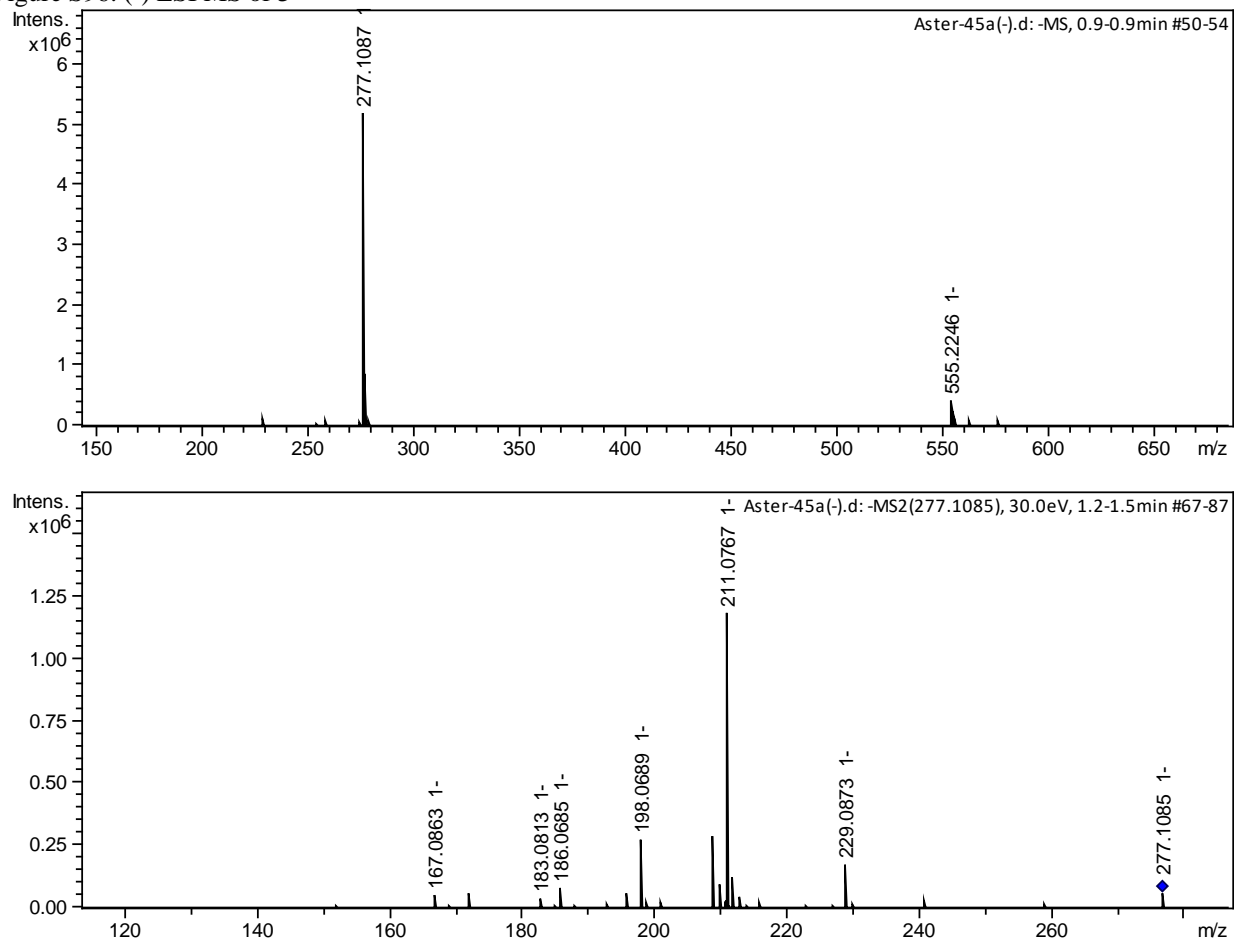

Figure S97. (+) ESI MS of **6**

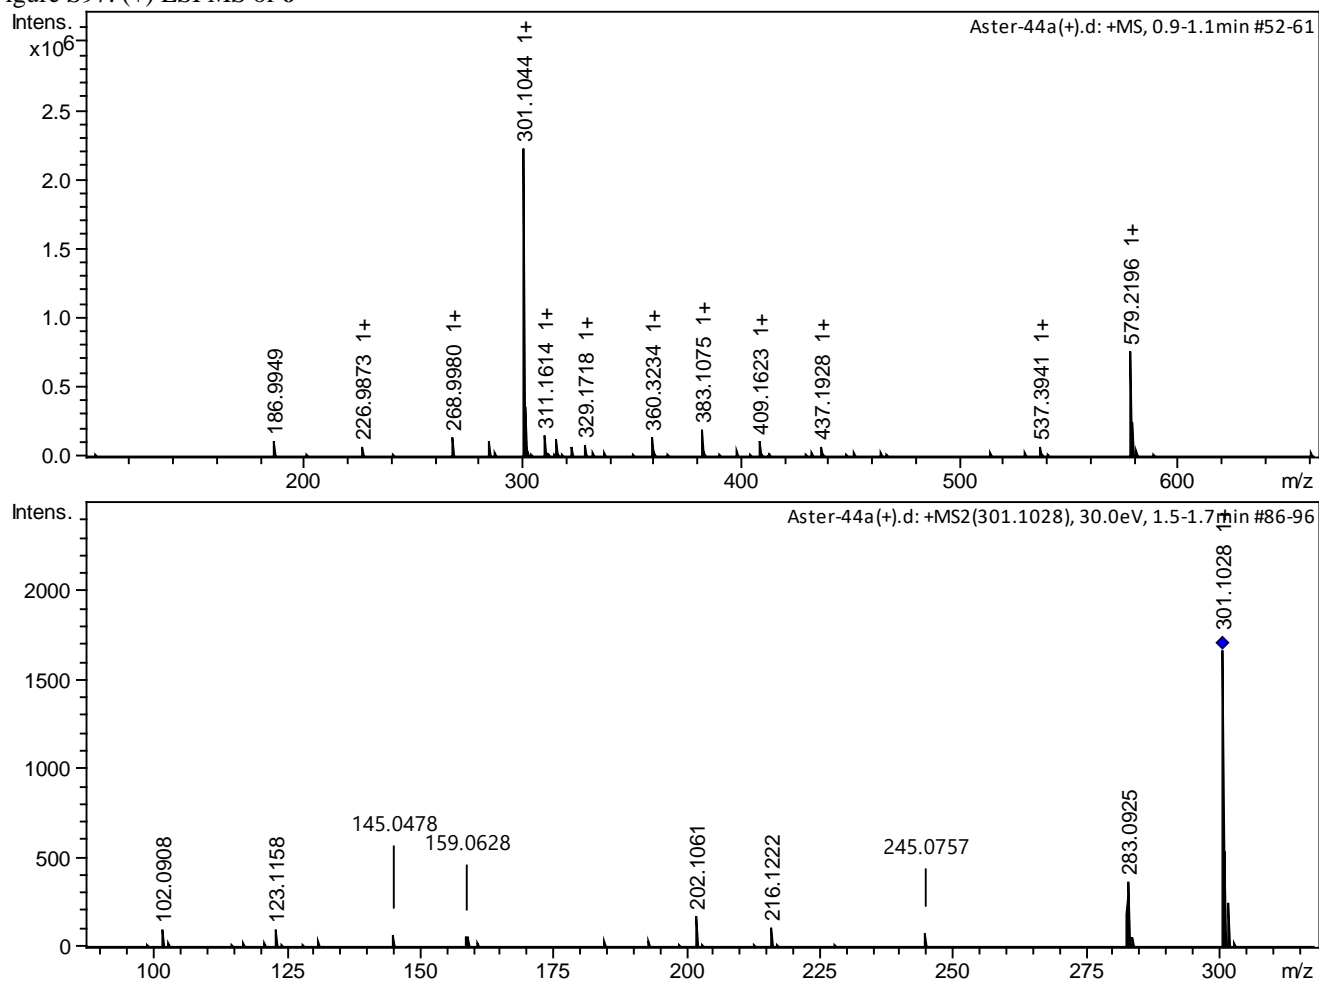



Figure S98. (+) ESI MS of 7

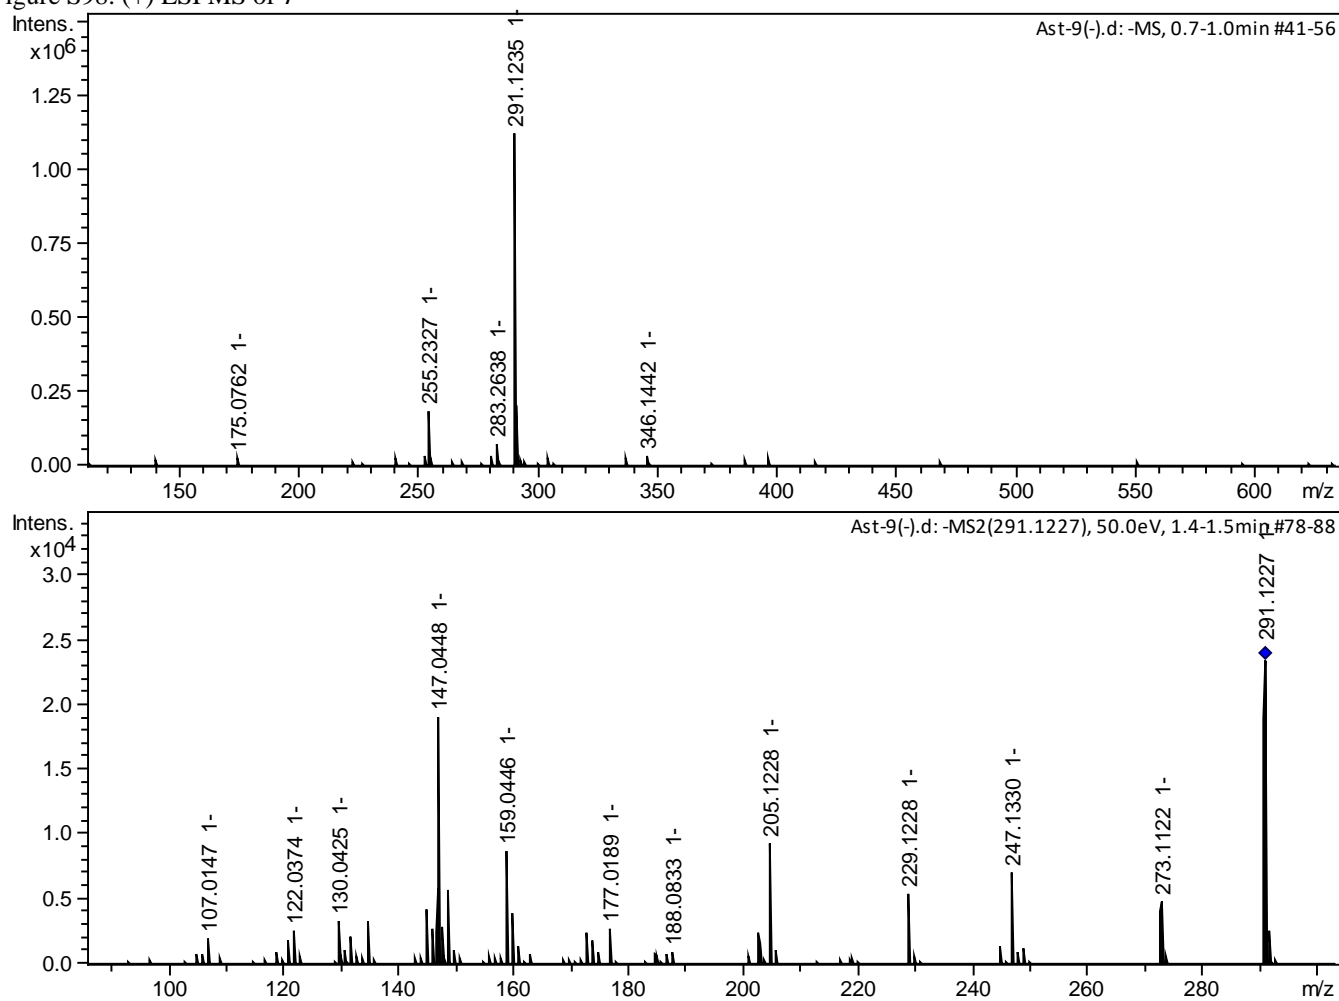

Figure S99. (+) ESI MS of **8**

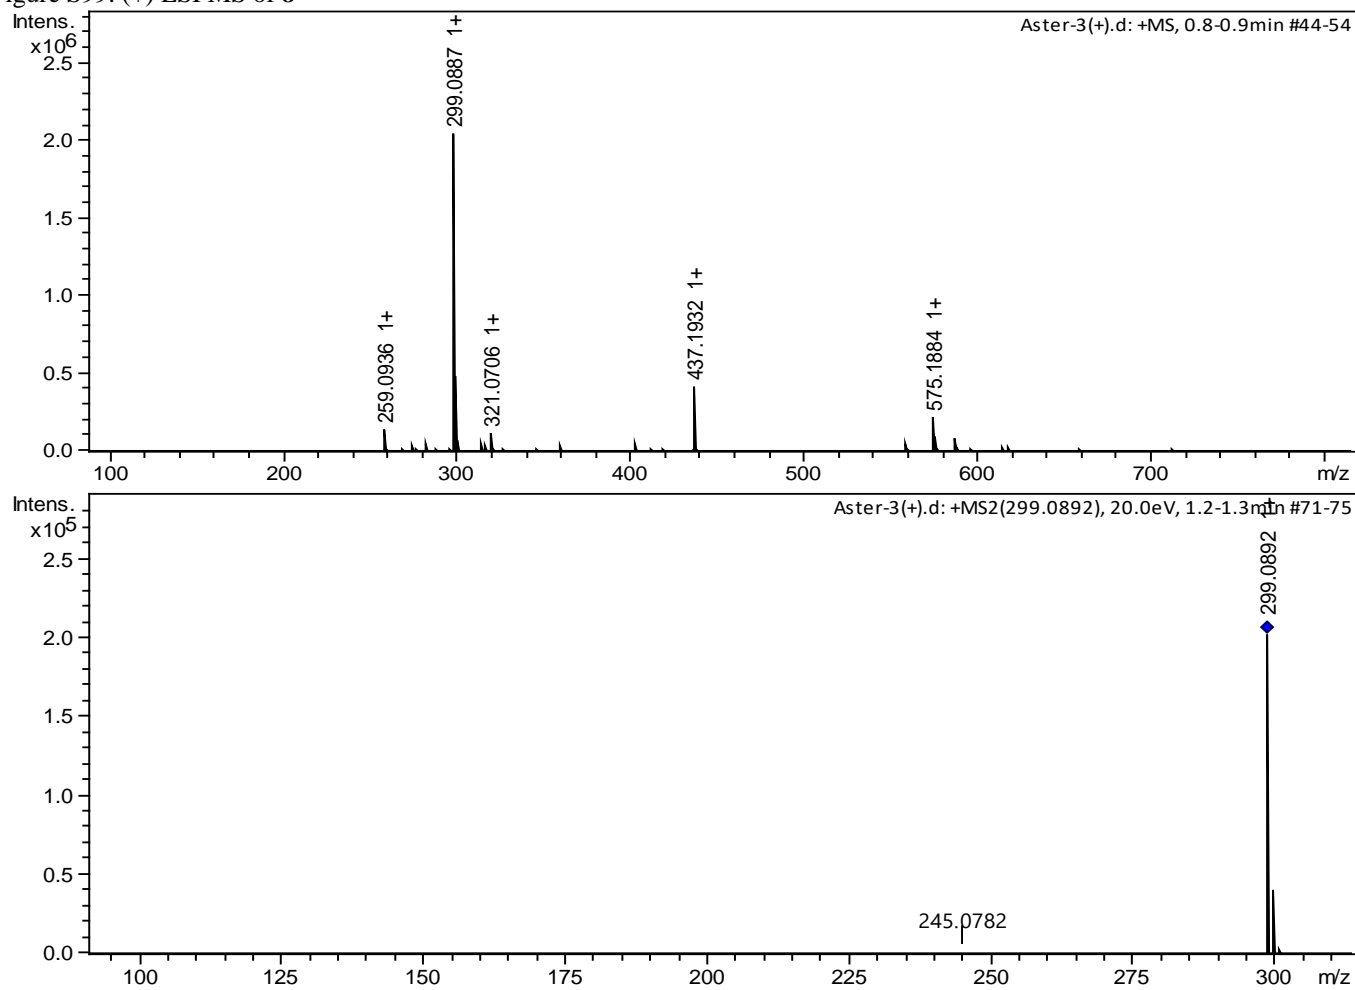

Figure S100. (-) ESI MS of **9**

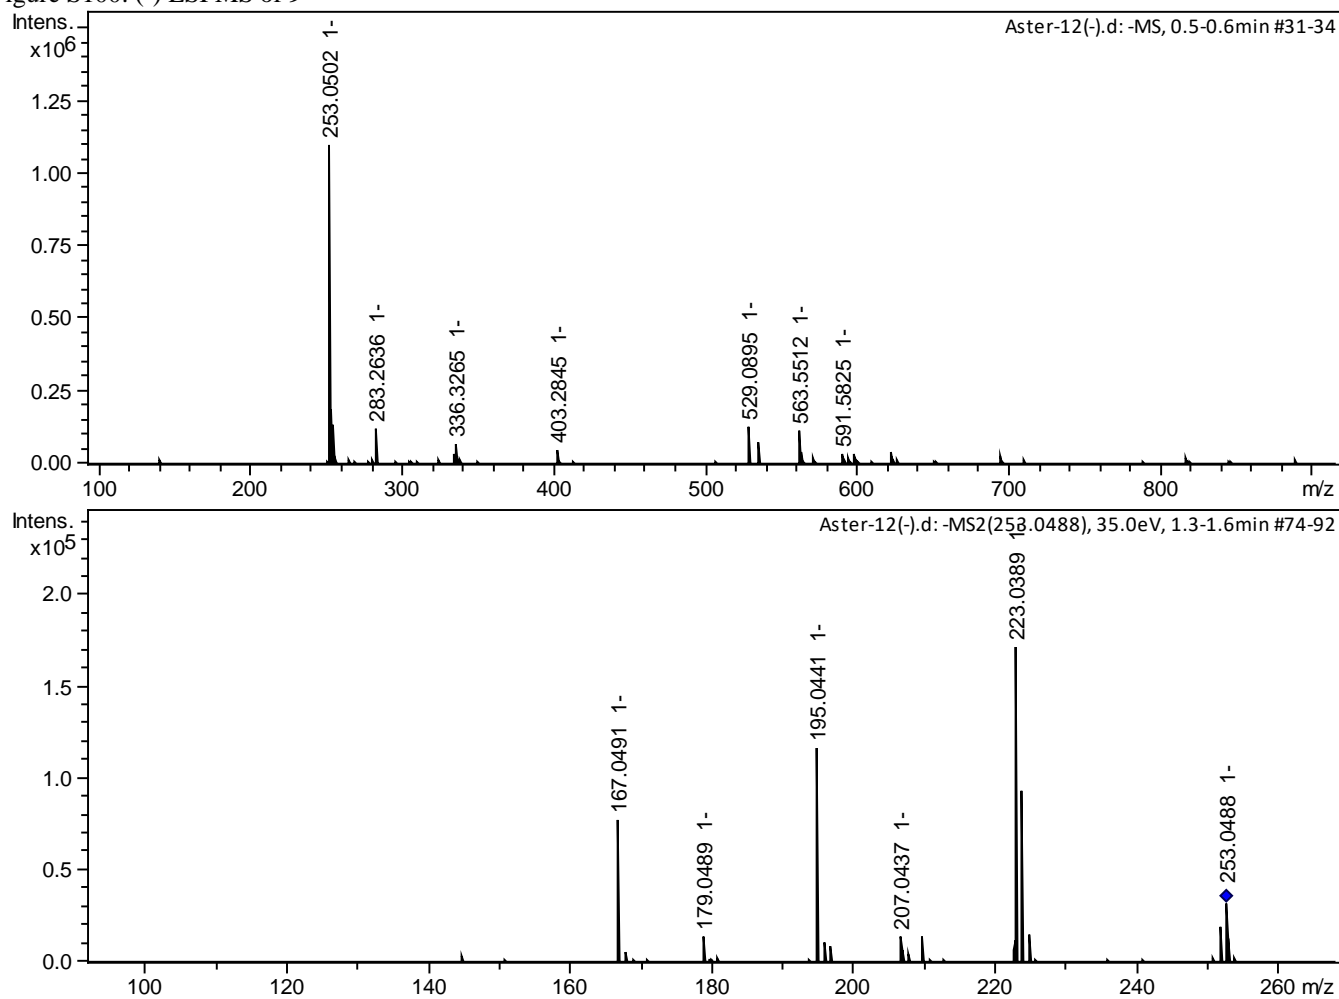

Figure S101. (-) ESI MS of **10**

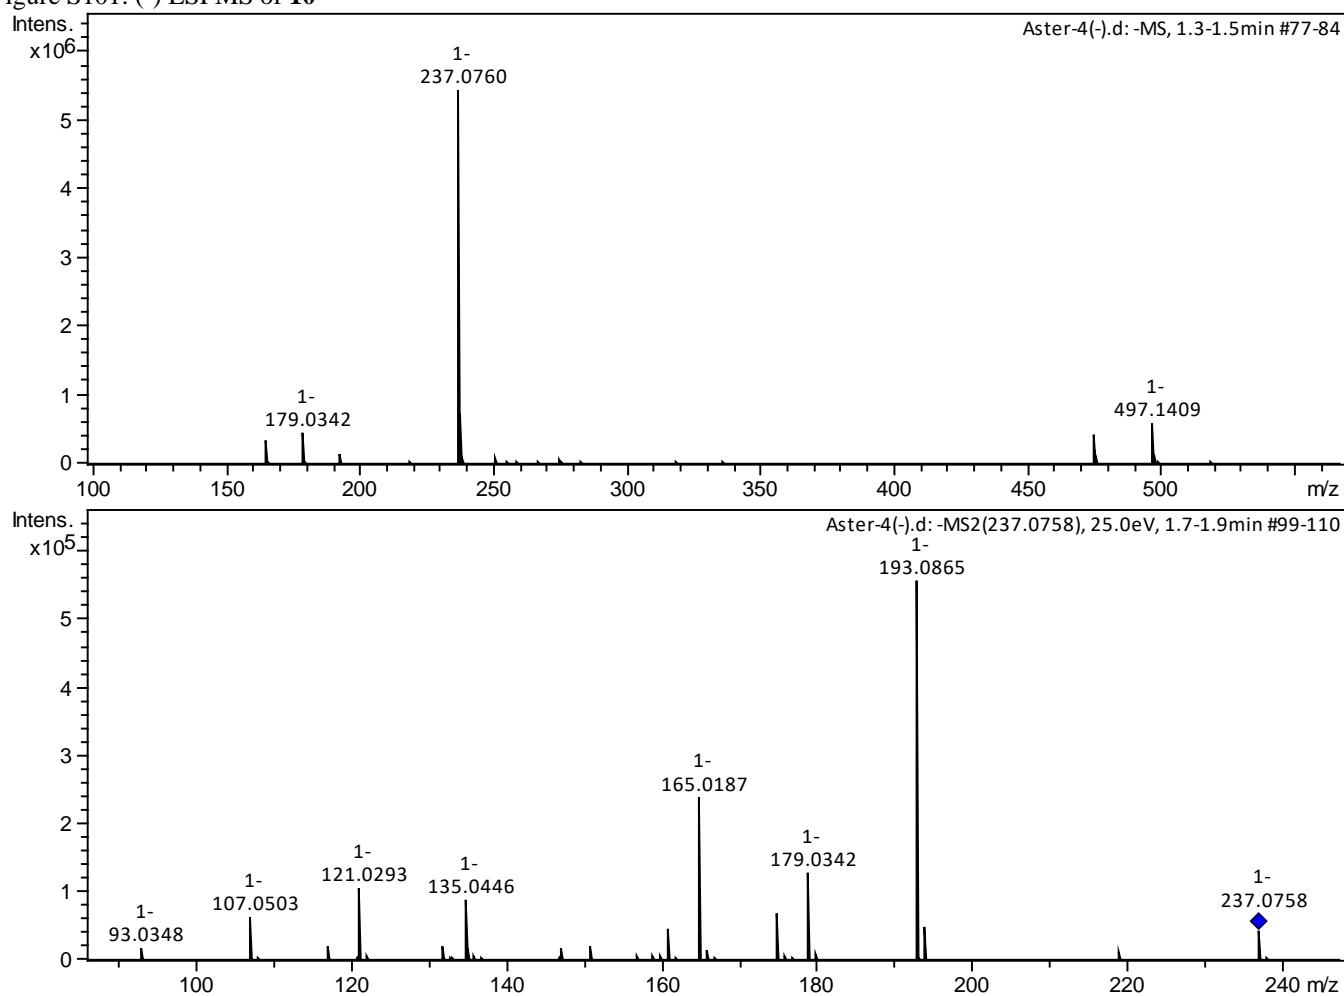

Figure S102. (-) ESI MS of **11**

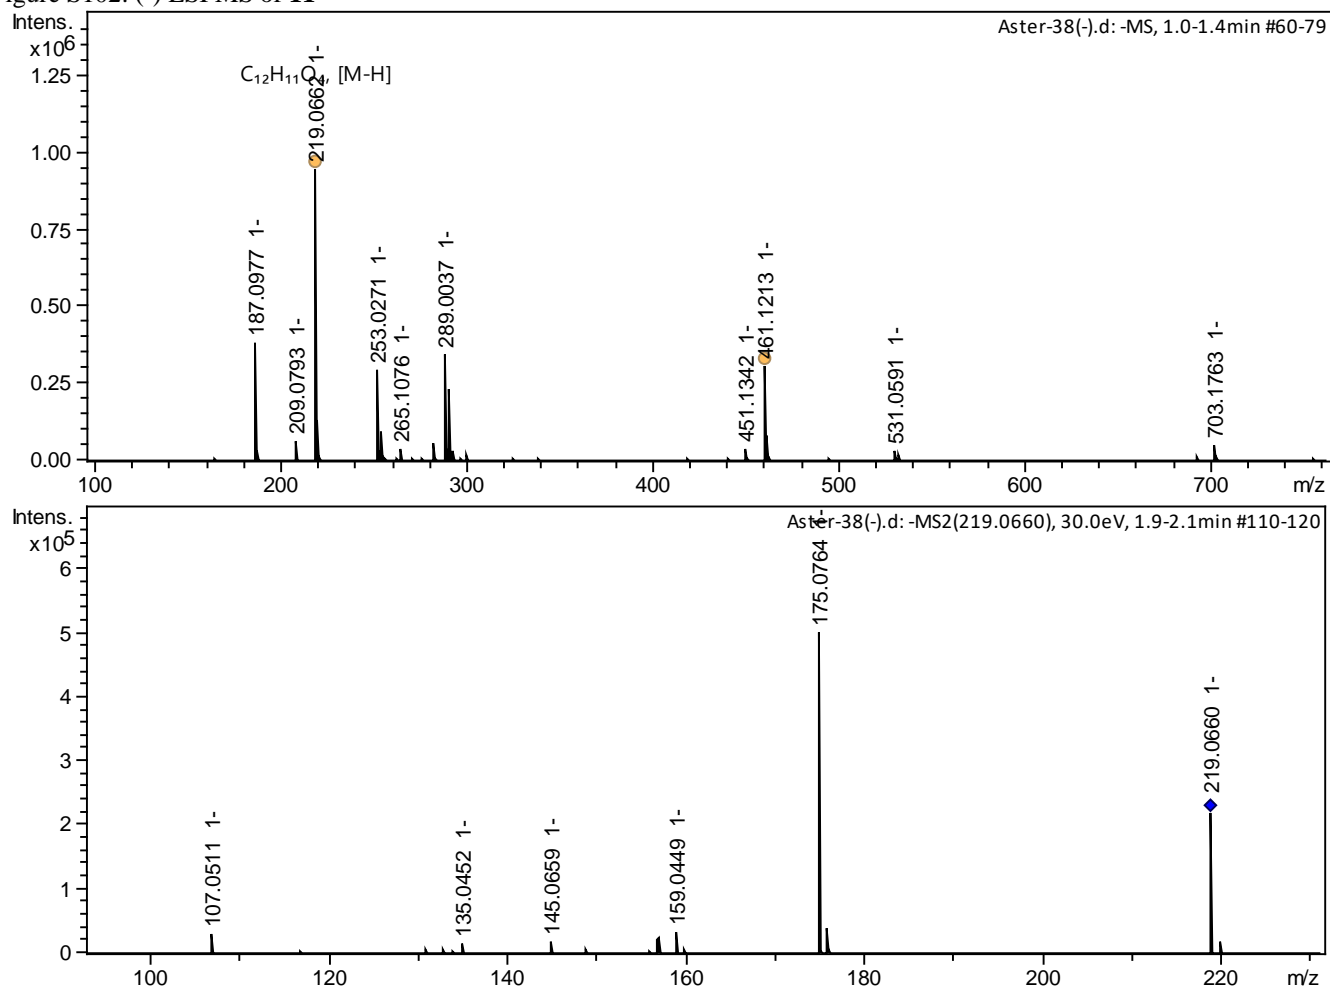

Figure S103. (+) ESI MS of **12**

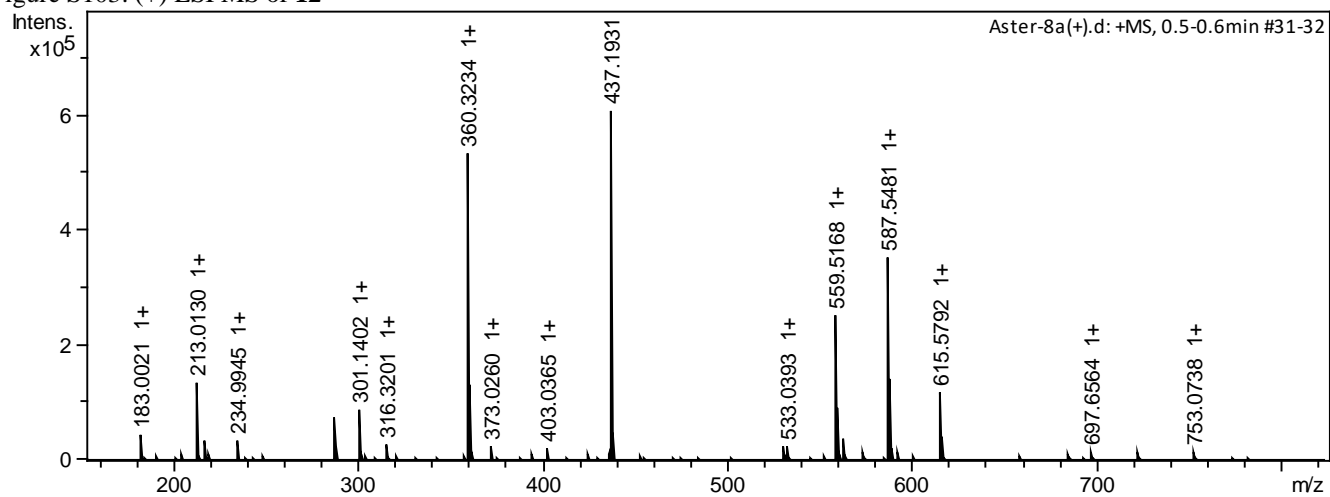

Figure S104. (+) ESI MS of **13**

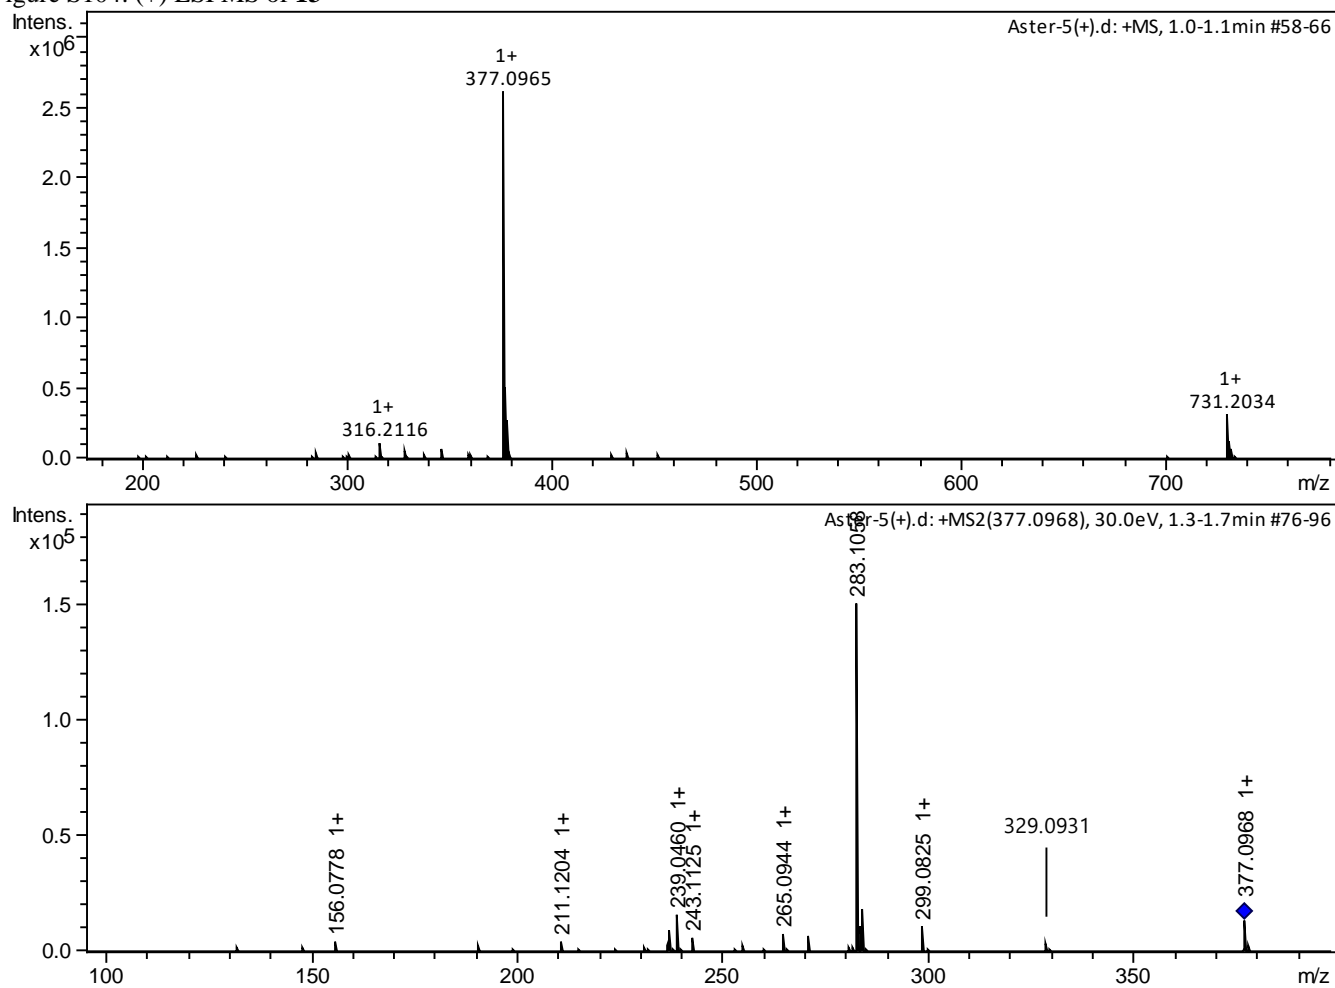

Supplement: s1 [file s1]
